# Supplementary material for: Subgroup analysis of proinsulin and insulin levels reveals novel correlations to metabolic indicators of type 2 diabetes
Source: publisher site journal article supplement (doi:10.18632/aging.103289), 2020-06-12
Supplement: Supplementary file 1 [file aging-v12i11-103289-supplementary-material-SD3.xls]

## Sheet: aging-12-103289-s003
Supplementary Table 2. Data used in this study after removing invalid data points.
ID	location	sex	Age	DiabeteFamily	diabeteHistory	HighBloodPressure	HighBloodLipid	HighUrineAcid	Gout	Hight	weight	BMI	systolicPressure	diastolicPressure	waist	HeartBeat	FPG	OGTT2hPG	Tryglyceride	TotalCholesterol	LDL	HDL	BloodUrineAcide	HbA1c	VitaminD3	FastProIns	X2hProIns	FastIns	X2hIns	HighbloodUrineAcid	Diabetes	GestatioDiabetes	DiabeteHistory	GlycationOver6.3	GlycationOver6.5	IFG	IGT	FastP.I	X2hP.I	ProInsIncrease	InsIncrease	Matsuda	FastInsmu	X2hInsmu	FPGmg	X2hPG
1	B	2	72	2	2	2	7	3	3	138	48	25.2	134	77	74	78	5	5.7	2.4	5.71	3.2	1.65	270	5.7	40.7	7.06	23.65	46.73	255.7	0	0	NA	0	0	0	0	0	0.15	0.09	3.35	5.47	8.90003	6.70926	36.7121	90	102.6
3	B	1	75	2	2	2	7	3	3	158	55	22.03	151	75	81	77	5.6	13	2.18	5	2.63	1.54	364	6.4	54.1	13.8	72.21	33.31	350.2	0	1	NA	0	1	0	0	0	0.41	0.21	5.23	10.51	6.70892	4.78248	50.28	100.8	234
4	B	2	52	2	2	2	7	3	3	145	57	27.11	130	88	82	86	5.4	9.3	2.13	5.39	3.35	1.37	317	5.5	28.6	11.3	40.27	74.71	519.7	0	0	NA	0	0	0	0	1	0.15	0.08	3.56	6.96	4.12184	10.7265	74.6159	97.2	167.4
5	B	2	55	1	1	1	3	3	3	153	60	25.63	135	78	83	85	6.5	11	2.21	6.94	4.45	1.69	496	6.3	42.6	29.9	114.22	96.32	877.6	1	0	NA	0	0	0	0	1	0.31	0.13	3.82	9.11	2.3691	13.8291	126.001	117	198
6	A	2	30	1	2	2	1	2	2	166	62	22.5	100	60	83	70	4.1	6.5	0.6	3.8	1.48	1.75	335	5.4	35.9	13.53	52.01	41.31	342.3	0	0	NA	0	0	0	0	0	0.33	0.15	3.84	8.29	9.32527	5.93108	49.1457	73.8	117
7	B	2	52	2	2	1	7	2	2	156	66	27.12	152	91	89	76	5.3	8.8	1.47	5.06	2.59	1.74	377	6.6	30.1	25.09	51.41	170.7	711.6	0	0	NA	0	1	1	0	1	0.15	0.07	2.05	4.17	2.30678	24.5083	102.168	95.4	158.4
8	A	1	40	2	2	2	2	2	3	170	69	23.88	125	80	83	76	4.7	6.3	1.62	4.97	2.62	1.42	422	5.8	30.8	11.82	41.69	54.95	361.7	1	0	NA	0	0	0	0	0	0.22	0.12	3.53	6.58	7.11318	7.88945	51.9311	84.6	113.4
9	B	2	55	2	2	2	6	2	2	160	57	22.27	124	65	80	80	5.4	4.5	4.86	5.12	2.41	1.23	345	5.7	28.7	17.89	78.34	94.16	1402	0	0	NA	0	0	0	0	0	0.19	0.06	4.38	14.89	2.81995	13.519	201.292	97.2	81
10	A	2	27	1	1	2	3	2	2	158	44	17.63	90	60	71	78	5.2	5	0.48	5.81	3.01	1.94	328	5.8	34.2	7.46	19.79	28.64	310	0	0	1	0	0	0	0	0	0.26	0.06	2.65	10.82	10.79	4.11199	44.5083	93.6	90
11	B	2	53	2	2	2	1	2	1	153	73	31.18	130	82	90	91	5.3	5.1	1.13	5.41	3.37	1.5	382	5.6	41.6	26.44	38.95	131.8	109.2	0	0	NA	0	0	0	0	0	0.2	0.36	1.47	0.83	5.84868	18.9232	15.6784	95.4	91.8
12	B	2	52	2	2	3	7	3	1	155	59	24.56	122	95	89	100	5.1	4.1	2.81	6.9	3.98	1.83	293	5.7	43.6	11.93	19.55	126	42.53	0	0	NA	0	0	0	0	0	0.09	0.46	1.64	0.34	7.75311	18.0905	6.10625	91.8	73.8
13	B	1	49	2	2	2	7	3	3	162	70	26.67	108	77	92	74	5	6.1	1.64	5.82	3.83	1.37	346	5.5	38.7	13.48	38.14	79.71	698.8	0	0	NA	0	0	0	0	0	0.17	0.05	2.83	8.77	4.17007	11.4444	100.33	90	109.8
14	A	1	53	1	2	2	34	2	2	170	60	20.76	125	80	80	72	5	5.5	1.2	6.62	3.49	2	399	5.8	48.9	14.89	53.88	126.5	151.4	0	0	NA	0	0	0	0	0	0.12	0.36	3.62	1.2	5.69652	18.1622	21.7373	90	99
15	B	2	56	2	2	2	3	3	3	150	45	20	118	76	61	71	4.4	8.8	1.54	6.13	3.43	1.85	286	5.7	35	3.35	12.84	33.64	356.3	0	0	NA	0	0	0	0	1	0.1	0.04	3.83	10.59	8.86622	4.82986	51.1558	79.2	158.4
16	A	2	25	2	2	2	1	2	2	158	55	22.03	110	76	78	89	2.9	4.4	0.4	3.53	1.43	1.22	207	4.8	30.8	13.4	34.9	81.88	310.88	0	0	NA	0	0	0	0	0	0.16	0.11	2.6	3.8	9.3792	11.7559	44.6346	52.2	79.2
17	B	1	70	2	2	1	1	3	3	168	77	27.28	175	87	95	78	6.2	11.9	2.76	7.32	4.85	1.39	452	5.9	63.7	16.83	70.36	66.67	768.3	1	1	NA	0	0	0	0	0	0.25	0.09	4.18	11.52	3.0963	9.57215	110.309	111.6	214.2
18	A	2	34	1	1	2	3	2	2	162	41	15.62	110	80	66	70	4.55	7.3	0.72	5.4	2.69	1.87	251	5.8	25	11.96	63.32	41.86	294.5	0	0	1	0	0	0	0	0	0.29	0.22	5.29	7.04	8.88202	6.01005	42.2828	81.9	131.4
19	B	2	57	2	2	2	7	3	3	161	70	27.01	140	92	88	91	4.9	7.1	1.84	5.91	3.54	1.65	377	5.4	39	13.52	67.21	87.77	639.1	0	0	NA	0	0	0	0	0	0.15	0.11	4.97	7.28	3.99566	12.6016	91.7588	88.2	127.8
21	B	1	55	2	2	2	7	3	3	156	57	23.42	133	73	75	71	4.4	7.9	2.17	4.59	2.51	1.2	351	6	47.6	6.8	28.76	38.18	249.3	0	0	NA	0	0	0	0	1	0.18	0.12	4.23	6.53	10.041	5.48169	35.7933	79.2	142.2
22	A	2	32	1	2	2	4	2	2	168	59	20.9	110	60	80	72	4	5.6	1.09	5.09	1.19	3.24	280	5	15.5	12.28	58.77	61.8	770.2	0	0	NA	0	0	0	0	0	0.2	0.08	4.79	12.46	5.50753	8.87294	110.581	72	100.8
23	B	2	50	2	2	2	7	3	3	152	60	25.97	120	83	72	85	5.8	7.4	1.88	4.81	2.16	1.7	333	5.9	43.2	11.43	31.01	51.23	284.8	0	0	NA	0	0	0	0	0	0.22	0.11	2.71	5.56	6.74103	7.35535	40.8902	104.4	133.2
24	A	2	54	2	2	2	2	1	2	155	55	22.89	134	90	80	76	5.2	7.3	5.13	4.65	1.74	1.12	563	6.4	35.6	22.62	53.88	295.2	348.6	1	0	NA	0	1	0	0	0	0.08	0.15	2.38	1.18	2.20185	42.3833	50.0503	93.6	131.4
25	B	2	39	2	2	2	1	3	3	151	57	25	109	68	74	85	4.9	6.2	2.02	5.56	3.21	1.6	298	5.5	31.7	10.19	48.61	70.08	342.4	0	0	NA	0	0	0	0	0	0.15	0.14	4.77	4.89	6.17192	10.0617	49.1601	88.2	111.6
26	B	1	51	2	2	2	1	3	3	178	74	23.36	107	66	82	60	4.7	4.8	1.44	4.57	2.45	1.52	386	5.7	51.1	11.62	37.58	74.54	207	0	0	NA	0	0	0	0	0	0.16	0.18	3.23	2.78	7.99472	10.7021	29.72	84.6	86.4
27	A	2	27	2	2	2	1	2	2	150	47	20.89	93	59	71	77	4.5	5.1	0.53	4.73	1.9	2.16	212	4.7	23.4	9.26	25.9	23.76	316.4	0	0	NA	0	0	0	0	0	0.39	0.08	2.8	13.32	13.097	3.41134	45.4271	81	91.8
28	B	2	53	2	2	2	1	3	1	160	60	23.44	134	84	79	92	5.6	10.2	1.64	5.84	3.25	1.81	320	5.1	33.9	16.3	85.36	97.62	813.8	0	0	NA	0	0	0	0	1	0.17	0.1	5.24	8.34	2.75821	14.0158	116.841	100.8	183.6
29	B	2	60	2	2	1	7	2	1	155	65	27.06	109	73	86	71	6.8	10.1	5.12	4.46	1.88	0.83	282	6.2	42.4	27.57	88.47	86.58	520.7	0	0	NA	0	0	0	0	1	0.32	0.17	3.21	6.01	3.14831	12.4307	74.7595	122.4	181.8
30	B	1	59	2	2	1	1	3	3	167	70	25.1	167	78	79	53	6.9	11.9	2.42	6.47	3.37	2.04	385	6.1	47.7	15.71	63.74	80.79	618.1	0	1	NA	0	0	0	0	0	0.19	0.1	4.06	7.65	2.85951	11.5994	88.7437	124.2	214.2
31	A	2	24	2	2	2	1	2	2	163	53	19.95	94	60	68	70	3.7	5.4	0.68	3.98	1.48	1.8	272	5.2	40.6	8.45	18.43	30.2	263.8	0	0	NA	0	0	0	0	0	0.28	0.07	2.18	8.74	14.154	4.33597	37.8751	66.6	97.2
32	B	2	36	2	2	2	1	2	2	149	49	22.07	112	68	70	71	5	8.9	1.43	4.41	2.44	1.36	229	5.2	28.1	6.48	22.86	68.98	323	0	0	NA	0	0	0	0	1	0.09	0.07	3.53	4.68	5.64537	9.9038	46.3747	90	160.2
33	B	2	51	2	2	1	7	3	3	150	49	21.78	160	93	68	94	5.1	6.5	1.92	5.2	3.14	1.41	322	5.6	49.7	11.97	43.48	56.3	1332	0	0	NA	0	0	0	0	0	0.21	0.03	3.63	23.66	3.59889	8.08327	191.242	91.8	117
34	B	2	66	2	2	2	1	3	3	158	61	24.44	120	73	80	66	5.3	6.4	1.88	6.36	3.96	1.75	273	5.6	37.3	5.95	14.63	54.47	193.5	0	0	NA	0	0	0	0	0	0.11	0.08	2.46	3.55	8.45609	7.82053	27.7818	95.4	115.2
35	B	2	34	2	2	2	7	3	3	152	79	34.19	130	87	91	94	5.1	8.5	1.88	4.86	2.64	1.54	364	5.2	37.4	11.81	33.64	118.9	879.2	0	0	NA	0	0	0	0	1	0.1	0.04	2.85	7.39	2.6974	17.0711	126.231	91.8	153
36	B	2	69	2	2	2	1	3	3	143	53	25.92	171	92	84	89	4.5	6.5	1.51	7.16	4.3	2.03	250	5.5	54.6	13.11	47.35	74.66	410.5	0	0	NA	0	0	0	0	0	0.18	0.12	3.61	5.5	5.77949	10.7193	58.9375	81	117
37	B	1	63	2	2	2	7	3	2	162	72	27.43	108	62	90	70	4.9	8.1	2.34	5.31	3.21	1.28	471	4.7	54.3	6.97	20.04	71.33	471	1	0	NA	0	0	0	0	1	0.1	0.04	2.88	6.6	4.92993	10.2412	67.6238	88.2	145.8
38	A	2	36	2	2	2	1	2	2	158	50	20.03	115	70	68	75	5.077	6.376	0.5	4.92	2.55	1.79	158	5.1	21.3	2.2	23.43	39.61	240.5	0	0	NA	0	0	0	0	0	0.06	0.1	10.65	6.07	9.63493	5.68701	34.5298	91.386	114.768
40	A	2	65	2	2	2	1	2	2	159	51	20.17	120	80	74	68	5.227	6.174	1.04	4.89	2.82	1.3	172	5.9	15.5	8.96	51.79	57.73	410.9	0	0	NA	0	0	0	0	0	0.16	0.13	5.78	7.12	6.09488	8.28859	58.995	94.086	111.132
41	B	1	56	2	2	2	7	3	1	168	59	20.9	110	82	81	87	4.9	7.8	1.77	3.92	1.73	1.54	325	5.5	65.4	9.66	38.62	39.47	459.3	0	0	NA	0	0	0	0	1	0.24	0.08	4	11.64	6.9919	5.66691	65.944	88.2	140.4
42	A	2	46	2	2	2	1	2	1	158	51	20.43	120	70	78	76	4.475	6.003	0.48	6.35	3.71	1.83	242	5.4	24.9	2.25	21.31	43.03	254.3	0	0	NA	0	0	0	0	0	0.05	0.08	9.47	5.91	9.99166	6.17803	36.5111	80.55	108.054
43	B	2	55	2	2	1	7	3	1	153	61	26.06	157	92	79	73	4.7	5.8	2.6	6.89	4.05	1.8	234	5.3	44.3	3.9	11.14	30.24	235	0	0	NA	0	0	0	0	0	0.13	0.05	2.86	7.77	12.3006	4.34171	33.7401	84.6	104.4
44	A	1	43	2	2	2	3	2	2	160	58	22.66	116	78	84	70	3.8	7.4	1.71	5.94	3.45	1.5	297	5.5	26.1	10.48	54.23	53.36	562.2	0	0	NA	0	0	0	0	0	0.2	0.1	5.17	10.54	6.54538	7.66116	80.7179	68.4	133.2
45	B	2	55	2	2	1	2	3	3	150	61	27.11	147	73	78	93	6	9.3	2.3	8.56	5.12	2	318	5.9	43.2	16.21	81.16	79.87	695.8	0	0	NA	0	0	0	0	1	0.2	0.12	5.01	8.71	3.24509	11.4673	99.8995	108	167.4
46	A	1	48	2	2	2	1	2	2	172	65	21.97	100	60	92	66	4.094	4.931	1.63	4.7	2.74	1.23	308	5.5	28.4	9.79	42.42	31.87	92.77	0	0	NA	0	0	0	0	0	0.31	0.46	4.33	2.91	20.2005	4.57574	13.3195	73.692	88.758
47	B	2	49	2	2	1	7	3	2	151	50	21.93	156	97	68	86	5	6	1.66	5.25	2.86	1.61	153	4.9	34.1	9.37	30.71	45.44	168	0	0	NA	0	0	0	0	0	0.21	0.18	3.28	3.7	10.596	6.52405	24.1206	90	108
48	B	2	45	2	2	2	1	2	2	150	54	24	110	76	67	77	4.7	7.4	2.41	5.84	3.44	1.56	293	5.5	33.1	9.6	50.84	81.49	944.9	0	0	NA	0	0	0	0	0	0.12	0.05	5.3	11.6	3.54837	11.6999	135.664	84.6	133.2
49	B	2	49	2	2	1	7	3	3	157	52	21.1	194	116	70	107	8.8	19.4	2.4	6	3.57	1.69	305	7.2	31.3	26.44	59.89	109.8	393.3	0	1	NA	0	1	1	0	0	0.24	0.15	2.27	3.58	2.09018	15.7645	56.4681	158.4	349.2
50	B	1	44	2	2	1	6	3	3	183	82	24.49	153	96	84	75	6.4	8.8	3.17	6.14	3.59	1.56	427	5.7	46.8	10.1	39.49	132.3	1044	1	0	NA	0	0	0	0	1	0.08	0.04	3.91	7.89	1.98897	18.995	149.892	115.2	158.4
51	A	2	47	2	2	2	1	2	2	151	50	21.93	90	60	87	60	4.834	6.149	1.19	3.89	1.82	1.48	303	5.4	21.3	0.22	17.71	32.96	179.6	0	0	NA	0	0	0	0	0	0.01	0.1	80.5	5.45	12.6891	4.73223	25.7861	87.012	110.682
52	B	2	16	2	2	2	1	3	3	164	55	20.45	108	75	67	96	4.3	6.2	1.83	4.87	2.88	1.47	324	5.4	29.1	12.66	65.26	64.89	1100	0	0	NA	0	0	0	0	0	0.2	0.06	5.15	16.95	4.18908	9.31658	157.933	77.4	111.6
53	B	2	37	2	2	2	7	3	2	150	63	28	102	62	89	66	5	6.4	2.41	4.85	2.93	1.27	257	4.8	40.8	7.76	19.34	124.3	406.9	0	0	NA	0	0	0	0	0	0.06	0.05	2.49	3.27	3.98912	17.8464	58.4207	90	115.2
54	A	1	32	1	2	2	2	2	2	181	87	26.56	130	80	88	70	4.4	6.5	1.15	4.98	3.2	1.34	391	5.4	41.8	12.52	38.4	65.39	163.7	0	0	NA	0	0	0	0	0	0.19	0.23	3.07	2.5	9.1302	9.38837	23.5032	79.2	117
55	B	2	32	2	2	2	7	3	3	155	51	21.23	100	61	69	65	4.5	5.9	1.86	4.01	2.18	1.26	304	4.4	28.5	9.7	58.38	41.22	439.4	0	0	NA	0	0	0	0	0	0.24	0.13	6.02	10.66	8.03713	5.91816	63.0869	81	106.2
56	B	2	26	2	2	2	1	2	2	150	42	18.67	99	73	63	104	4.5	4.8	1.67	5.11	2.8	1.65	344	5	35.6	8.15	40.63	94.76	535.6	0	0	NA	0	0	0	0	0	0.09	0.08	4.99	5.65	4.89468	13.6052	76.8988	81	86.4
57	A	2	34	2	2	2	1	2	2	152	45	19.48	120	70	68	60	4.889	3.251	1.48	7.17	3.96	2.14	258	5.5	27.7	5.97	32.44	36.14	105.3	0	0	NA	0	0	0	0	0	0.17	0.31	5.43	2.91	17.1584	5.1888	15.1184	88.002	58.518
58	B	1	56	2	2	2	7	3	3	164	51	18.96	113	74	70	86	5.1	9.5	1.97	8.03	4.83	2.09	265	6.3	30.3	12.53	44.38	23.76	249.2	0	0	NA	0	0	0	0	1	0.53	0.18	3.54	10.49	11.1364	3.41134	35.7789	91.8	171
59	A	1	36	2	2	1	1	2	2	173	69	23.05	126	90	85	71	5.1	7.4	1.42	3.81	1.99	1.11	373	5.6	39.7	15.36	45.6	82.93	352.9	0	0	NA	0	0	0	0	0	0.19	0.13	2.97	4.26	5.09829	11.9067	50.6676	91.8	133.2
60	B	2	51	2	2	3	1	3	3	148	50	22.83	94	65	69	61	4.7	5	1.78	6.03	2.83	2.17	252	5.5	34.5	9.44	32.98	39.92	156.5	0	0	NA	0	0	0	0	0	0.24	0.21	3.49	3.92	12.9436	5.73151	22.4695	84.6	90
61	A	1	37	1	2	2	7	3	3	162	65	24.77	120	80	95	80	5.384	5.998	9.92	7.29	3.82	1.13	625	5.9	34.5	17.88	42.94	86.78	337.8	1	0	NA	0	0	0	0	0	0.21	0.13	2.4	3.89	5.15024	12.4594	48.4996	96.912	107.964
62	B	2	52	2	2	1	7	3	2	150	59	26.22	164	109	79	90	5.3	7.1	2.05	5.85	3.18	1.83	419	5.5	35.1	14.35	58.67	78.94	488.9	0	0	NA	0	0	0	0	0	0.18	0.12	4.09	6.19	4.50888	11.3338	70.1938	95.4	127.8
64	B	2	56	2	2	2	7	3	3	152	62	26.84	144	78	75	67	3.7	6	2.6	6.24	3.49	1.66	251	5.8	45.7	9.78	46.11	68.13	329	0	0	NA	0	0	0	0	0	0.14	0.14	4.71	4.83	7.85338	9.78177	47.2362	66.6	108
65	A	2	51	1	2	2	23	2	2	154	51	21.5	126	78	80	78	4.908	5.41	2.51	5.5	2.78	1.45	309	5.3	30.8	3.75	25.18	73.88	319.3	0	0	NA	0	0	0	0	0	0.05	0.08	6.71	4.32	6.38072	10.6073	45.8435	88.344	97.38
66	B	1	53	2	2	2	7	3	3	151	65	28.51	145	71	93	83	5.1	8.2	1.68	3.83	2.56	0.91	467	6.5	45.8	10.11	25.14	59.42	270.5	1	0	NA	0	1	0	0	1	0.17	0.09	2.49	4.55	6.71115	8.53123	38.837	91.8	147.6
67	A	2	30	1	2	2	1	2	2	160	48	18.75	120	70	70	78	4.41	4.923	0.65	4.33	2.07	1.68	333	5.1	31.1	11.13	54.91	45.12	146.8	0	0	NA	0	0	0	0	0	0.25	0.37	4.93	3.25	12.963	6.4781	21.0768	79.38	88.614
68	B	2	67	2	2	2	7	3	3	140	44	22.45	119	66	76	104	4.1	7	2.53	4.77	2.43	1.51	414	5.9	33	13.12	66.71	42.15	282.8	0	0	NA	0	0	0	0	0	0.31	0.24	5.08	6.71	9.80208	6.05169	40.603	73.8	126
69	A	2	30	2	2	2	2	2	2	160	50	19.53	120	72	74	74	4.481	3.814	0.66	4.68	2.56	1.54	245	5	30	4.39	24.97	67.02	260.9	0	0	NA	0	0	0	0	0	0.07	0.1	5.69	3.89	8.56242	9.6224	37.4587	80.658	68.652
70	B	2	80	2	2	2	7	3	3	156	40	16.44	103	67	74	98	4.8	10.1	1.83	7.43	4.93	1.92	253	5.3	36.3	9.46	36.81	25.47	339	0	0	NA	0	0	0	0	1	0.37	0.11	3.89	13.31	9.49772	3.65686	48.6719	86.4	181.8
71	A	2	60	1	2	2	1	2	2	143	50	24.45	130	80	78	78	6.393	6.988	0.72	4.95	2.35	1.77	279	7.3	41.2	10.5	37.97	31.82	97.32	0	0	NA	0	1	1	1	0	0.33	0.39	3.62	3.06	13.0527	4.56856	13.9727	115.074	125.784
72	B	2	81	2	2	1	7	3	3	142	48	23.8	173	89	80	110	8.2	19.2	2.14	9.27	6.24	1.89	297	7.5	29.5	7.73	12.58	76.88	104.2	0	1	NA	0	1	1	0	0	0.1	0.12	1.63	1.36	4.37577	11.038	14.9605	147.6	345.6
73	A	2	29	2	2	2	6	2	2	162	60	22.86	135	90	92	80	3.417	4.074	0.79	5.72	3.4	1.44	281	4.6	21.8	1.68	6.03	53.78	52.71	0	0	NA	0	0	0	0	0	0.03	0.11	3.59	0.98	20.2126	7.72146	7.56784	61.506	73.332
74	B	2	71	2	2	2	7	3	3	150	57	25.33	137	78	100	81	5	8.8	2.3	7.02	4.54	1.65	337	5.9	34	21.7	46.45	80.39	239.7	0	0	NA	0	0	0	0	1	0.27	0.19	2.14	2.98	5.80787	11.542	34.4149	90	158.4
75	A	2	28	1	2	2	1	2	2	158	43	17.22	90	58	65	78	4.405	4.965	0.96	4.39	2.39	1.37	286	4.7	42.4	2.98	74.19	40.58	386.4	0	0	NA	0	0	0	0	0	0.07	0.19	24.9	9.52	9.15116	5.82627	55.4774	79.29	89.37
76	B	1	72	2	2	2	1	3	2	158	65	26.04	148	88	93	77	4.5	8.1	2.15	5.26	3.1	1.45	448	5.7	54.7	15.5	58.04	96.21	599.7	1	0	NA	0	0	0	0	1	0.16	0.1	3.74	6.23	3.97192	13.8134	86.1019	81	145.8
77	A	2	26	1	2	2	1	2	2	162	50	19.05	115	70	80	77	4.902	4.93	0.42	3.92	2.18	1.24	236	NA	28.8	5.94	16.14	64.44	99.64	0	0	NA	0	NA	NA	0	0	0.09	0.16	2.72	1.55	10.8409	9.25197	14.3058	88.236	88.74
78	B	2	69	2	2	1	1	3	2	149	56	25.22	165	71	84	75	4.7	7.9	2.21	6.95	4.24	1.86	421	5.7	35.5	17.03	89.28	47.92	556	1	0	NA	0	0	0	0	1	0.36	0.16	5.24	11.6	5.91148	6.88011	79.8277	84.6	142.2
79	A	2	37	1	2	2	3	2	2	155	53	22.06	110	70	80	70	5.107	6.514	0.99	5.54	2.88	1.85	251	5.6	21.1	4.91	43.92	49.85	330.7	0	0	NA	0	0	0	0	0	0.1	0.13	8.95	6.63	7.29349	7.15721	47.4803	91.926	117.252
80	B	2	48	1	2	2	7	3	2	149	46	20.72	119	82	67	84	5.5	8.6	1.73	4.47	2.51	1.43	294	5.6	33.2	9.61	46.01	74.37	537.2	0	0	NA	0	0	0	0	1	0.13	0.09	4.79	7.22	4.12065	10.6777	77.1285	99	154.8
81	A	2	23	2	2	2	1	2	2	163	50	18.82	100	90	77	70	4.403	5.039	0.79	5.02	2.61	1.7	304	5.3	23.8	12.06	30.13	53.43	116	0	0	NA	0	0	0	0	0	0.23	0.26	2.5	2.17	12.6149	7.67121	16.6547	79.254	90.702
82	B	1	54	1	2	2	2	3	2	166	53	19.23	126	69	75	87	5.2	6.1	1.59	5.04	3.01	1.37	324	6	59.9	9.69	36.12	34.06	220.3	0	0	NA	0	0	0	0	0	0.28	0.16	3.73	6.47	10.8465	4.89017	31.6296	93.6	109.8
83	A	1	26	1	2	2	1	2	2	175	100	32.65	120	85	110	82	4.557	9.721	2.05	6.3	3.84	1.39	488	5.6	22.3	48.86	225.34	81.64	1027	1	0	NA	0	0	0	0	1	0.6	0.22	4.61	12.58	3.18903	11.7215	147.452	82.026	174.978
84	B	2	59	2	1	3	6	3	3	150	49	21.78	114	82	74	79	6.4	6.6	2.8	4.51	2.48	1.22	271	6.9	26.3	13.46	27.08	52	116.3	0	1	NA	1	1	1	0	0	0.26	0.23	2.01	2.24	9.06929	7.4659	16.6978	115.2	118.8
85	A	2	59	1	2	2	6	1	1	160	62	24.22	125	78	90	68	3.5	6.294	1.29	7.74	5.02	1.44	293	5.6	31.3	10.48	36.51	34.64	182.8	1	0	NA	0	0	0	0	0	0.3	0.2	3.48	5.28	15.2302	4.97344	26.2455	63	113.292
86	B	1	55	2	2	2	6	3	2	181	96	29.3	129	90	103	89	5.2	8.3	12.4	6.84	0.89	1.18	517	6.4	43.9	21.4	55.55	47.46	195.8	1	0	NA	0	1	0	0	1	0.45	0.28	2.6	4.13	8.59629	6.81407	28.112	93.6	149.4
87	A	1	60	2	2	2	7	3	3	160	60	23.44	125	70	85	70	3.209	7.78	0.74	3.38	1.84	1	244	5.1	30.5	5.37	65.02	31.99	332	0	0	NA	0	0	0	0	0	0.17	0.2	12.11	10.38	12.0771	4.59296	47.6669	57.762	140.04
88	B	2	58	2	2	1	6	3	2	150	61	27.11	134	81	86	90	8	16.9	39.3	13.1	1.48	2.37	371	7.2	36.4	39.64	94.22	74.22	198.8	0	1	NA	0	1	1	0	0	0.53	0.47	2.38	2.68	3.85191	10.6561	28.5427	144	304.2
89	A	1	53	2	2	1	1	1	1	168	88	31.18	150	90	92	72	5.479	10.69	1.71	6.06	3.63	1.4	613	6.1	27	28.13	68.96	206.8	2915	1	0	NA	0	0	0	0	1	0.14	0.02	2.45	14.1	1.02331	29.6913	418.521	98.622	192.42
91	B	2	79	2	2	2	7	3	3	141	47	23.64	138	83	75	87	12.2	23.3	3.02	6.06	3.21	1.72	219	9.9	25.1	13.37	24.84	82.9	165.3	0	1	NA	0	1	1	0	0	0.16	0.15	1.86	1.99	2.59243	11.9024	23.733	219.6	419.4
92	B	1	58	2	2	2	1	1	2	161	49	18.9	134	82	69	76	5.9	5.5	2.08	7.07	4.79	1.48	453	6	47.1	9.02	24.89	48.08	110.8	1	0	NA	0	0	0	0	0	0.19	0.22	2.76	2.3	10.7965	6.90309	15.9081	106.2	99
93	A	2	27	2	2	2	4	2	2	151	53	23.24	118	63	74	85	4.219	9.336	1.85	5.85	2.99	1.63	428	6.3	25.4	31.05	171.87	73.49	734.2	1	0	NA	0	0	0	0	1	0.42	0.23	5.54	9.99	4.20037	10.5513	105.413	75.942	168.048
94	B	2	56	2	2	2	1	3	3	149	57	25.67	129	90	79	94	5.3	10.6	2.04	6.71	4.36	1.57	290	4.9	37.5	6.5	20.78	68.1	984.1	0	0	NA	0	0	0	0	1	0.1	0.02	3.2	14.45	3.14934	9.77746	141.292	95.4	190.8
95	A	1	21	2	2	2	1	2	2	175	80	26.12	126	74	92	70	4.471	4.941	0.99	5.2	3.34	1.16	626	5.1	25.9	7.79	47.29	65.74	329.5	1	0	NA	0	0	0	0	0	0.12	0.14	6.07	5.01	7.40099	9.43862	47.308	80.478	88.938
96	B	1	60	2	2	NA	7	3	3	154	58	24.46	146	104	81	79	4.7	5.4	1.78	5.96	3.77	1.67	405	4.6	51.5	11.76	41.98	34.69	180	0	0	NA	0	0	0	0	0	0.34	0.23	3.57	5.19	13.0155	4.98062	25.8435	84.6	97.2
97	A	2	21	2	2	2	1	2	2	155	44	18.31	98	67	65	90	4.165	5.335	2.81	3.91	2.14	0.92	278	4.8	33.6	0.22	50.38	35.63	403	0	0	NA	0	0	0	0	0	0.01	0.13	229	11.31	9.84129	5.11558	57.8607	74.97	96.03
98	B	1	80	2	2	2	1	2	1	151	54	23.68	118	70	82	68	4.9	7.8	2.15	6.89	3.83	1.87	403	6	41.4	11.93	45.51	38.03	265.5	0	0	NA	0	0	0	0	1	0.31	0.17	3.81	6.98	9.13092	5.46016	38.1192	88.2	140.4
99	A	2	41	2	2	2	1	2	2	158	60	24.03	130	80	80	70	5.009	7.425	0.47	4.96	2.7	1.54	252	5.3	20.5	0.4	15.75	30.69	167.3	0	0	NA	0	0	0	0	0	0.01	0.09	39.38	5.45	12.5799	4.40632	24.0201	90.162	133.65
100	B	2	34	2	2	2	7	3	3	164	75	27.89	111	72	86	61	5	5.7	1.86	5.04	2.89	1.45	355	5.5	43.6	6.96	16.49	89.96	268.7	0	0	NA	0	0	0	0	0	0.08	0.06	2.37	2.99	5.89027	12.916	38.5786	90	102.6
101	B	2	58	2	2	2	6	2	2	146	43	20.17	109	70	72	89	7.2	7.2	3.61	6.92	3.49	2.04	349	5.9	48	41.84	112.55	608.9	822.4	0	1	NA	0	0	0	0	0	0.07	0.14	2.69	1.35	0.814128	87.4228	118.076	129.6	129.6
102	B	1	48	2	2	2	1	3	2	166	67	24.31	109	75	89	76	4.5	3.9	1.7	3.97	1.89	1.39	366	5.4	41.6	13.39	51.96	40.81	104.4	0	0	NA	0	0	0	0	0	0.33	0.5	3.88	2.56	16.3513	5.8593	14.9892	81	70.2
103	A	2	37	1	2	2	7	3	3	150	46	20.44	120	80	80	80	5.24	5.014	1.2	7.33	4.22	2.09	462	5.3	32.4	6.62	11.23	47.93	40.39	1	0	NA	0	0	0	0	0	0.14	0.28	1.7	0.84	16.2268	6.88155	5.79899	94.32	90.252
104	B	2	39	2	2	2	1	3	3	150	49	21.78	105	67	71	80	4.3	5.7	1.73	5.68	2.81	2.09	208	5.2	33.9	10.74	34.26	68.25	416.5	0	0	NA	0	0	0	0	0	0.16	0.08	3.19	6.1	6.48835	9.79899	59.799	77.4	102.6
105	A	2	29	2	2	2	1	2	2	164	50	18.59	116	80	76	80	4.882	6.131	0.61	4.87	2.43	1.77	224	5.2	23.2	1.71	21.59	46.99	181.4	0	0	NA	0	0	0	0	0	0.04	0.12	12.63	3.86	10.1879	6.74659	26.0445	87.876	110.358
106	B	2	51	2	2	2	6	3	3	156	69	28.35	115	72	88	74	5.1	6.8	2.57	7.38	4.44	1.84	344	5.4	34.1	14.52	63.41	157.8	771.7	0	0	NA	0	0	0	0	0	0.09	0.08	4.37	4.89	2.59383	22.6561	110.797	91.8	122.4
107	A	1	24	2	2	2	1	2	2	169	68	23.81	110	80	88	78	4.873	4.355	0.69	5.21	3.18	1.37	304	5.44	48.1	5.9	22.57	70.07	271	0	0	NA	0	0	0	0	0	0.08	0.08	3.83	3.87	7.46515	10.0603	38.9088	87.714	78.39
108	B	2	35	2	2	2	7	3	2	141	56	28.17	124	84	73	75	4.4	9.2	1.66	4.61	2.38	1.61	332	5.5	29.4	13.54	83.72	54.02	373.8	0	0	NA	0	0	0	0	1	0.25	0.22	6.18	6.92	6.58074	7.75592	53.6683	79.2	165.6
109	A	1	37	2	2	2	1	2	2	169	67	23.46	120	70	88	78	5.248	3.665	1.06	3.9	1.2	1.91	214	5.6	57.7	8.94	31.94	83.3	265.3	0	0	NA	0	0	0	0	0	0.11	0.12	3.57	3.18	6.64024	11.9598	38.0905	94.464	65.97
110	B	2	23	2	2	2	7	3	3	148	57	26.02	94	61	73	92	4.6	6.8	1.74	5.02	2.77	1.62	361	5.6	17.8	11.68	59.62	60.97	446.1	0	0	NA	0	0	0	0	0	0.19	0.13	5.1	7.32	6.07792	8.75377	64.0488	82.8	122.4
111	A	2	26	2	2	2	1	2	2	162	47	17.91	120	90	67	78	4.675	4.11	1.3	4.03	2.13	1.23	190	5.1	28.3	8.83	15.89	65.83	293	0	0	NA	0	0	0	0	0	0.13	0.05	1.8	4.45	7.85707	9.45154	42.0675	84.15	73.98
112	B	1	50	2	2	2	7	3	2	165	62	22.77	140	86	82	71	5.6	6.1	1.54	3.99	2.1	1.35	447	5.3	43.2	12.07	32.13	35.49	107.1	1	0	NA	0	0	0	0	0	0.34	0.3	2.66	3.02	13.4398	5.09548	15.3769	100.8	109.8
113	A	1	29	2	2	2	1	2	2	169	78	27.31	110	70	76	70	4.478	4.15	0.76	4.96	2.48	1.79	363	5.1	32.6	5.2	36.57	24.63	176.8	0	0	NA	0	0	0	0	0	0.21	0.21	7.03	7.18	17.6761	3.53625	25.3841	80.604	74.7
114	B	2	55	2	2	2	7	3	2	151	73	32.02	140	90	86	71	4.4	4.7	2.18	6.27	3.66	1.74	285	5.5	28.6	16.45	31.89	167.1	163.6	0	0	NA	0	0	0	0	0	0.1	0.19	1.94	0.98	5.20267	23.9914	23.4889	79.2	84.6
115	A	2	65	2	2	2	1	2	2	157	70	28.4	130	80	102	67	4.741	7.524	1.96	4.93	2.53	1.52	362	5.6	36.9	14.31	68.14	85.27	97.88	0	0	NA	0	0	0	0	0	0.17	0.7	4.76	1.15	8.12098	12.2426	14.0531	85.338	135.432
116	B	2	58	2	2	2	6	3	3	153	66	28.19	123	71	83	82	5.5	10.7	2.78	7.26	4.28	1.84	288	5.5	30.7	16.8	52.94	126.8	1494	0	0	NA	0	0	0	0	1	0.13	0.04	3.15	11.78	1.80849	18.2053	214.501	99	192.6
117	A	2	50	2	2	2	1	2	2	169	71	24.86	120	70	90	68	5.208	5.416	1.27	4.86	2.42	1.74	135	5.3	28.9	0.22	11.87	53.56	496.1	0	0	NA	0	0	0	0	0	0	0.02	53.95	9.26	6.06362	7.68988	71.2276	93.744	97.488
118	B	2	78	2	2	1	7	3	3	155	60	24.97	115	68	87	77	9.1	10.8	2.07	3.57	1.59	1.3	298	6.3	39.1	82.94	112.27	286.7	376.7	0	1	NA	0	0	0	0	0	0.29	0.3	1.35	1.31	1.31865	41.163	54.0847	163.8	194.4
119	A	2	22	1	2	2	7	2	1	155	49	20.4	124	80	71	78	4.653	4.675	5.93	4.81	2.47	0.83	264	5	17.8	0.98	11.97	75.75	202.5	0	0	NA	0	0	0	0	0	0.01	0.06	12.21	2.67	8.09113	10.8758	29.0739	83.754	84.15
120	B	2	60	2	2	2	7	3	3	150	42	18.67	131	112	68	78	4.5	7	1.73	3.96	1.75	1.58	227	5.7	34.2	10.36	54.34	16.45	350.5	0	0	NA	0	0	0	0	0	0.63	0.16	5.25	21.31	13.8464	2.36181	50.323	81	126
122	B	2	61	2	2	2	1	2	2	154	67	28.25	129	77	91	72	13.2	26.2	2.64	7.75	4.8	1.89	329	9.6	43.7	24.13	55.57	67.93	192.2	0	1	NA	0	1	1	0	0	0.36	0.29	2.3	2.83	2.5528	9.75305	27.5951	237.6	471.6
123	A	1	25	2	2	2	1	3	3	171	60	20.52	110	65	65	68	3.918	5.504	0.44	4.41	2.21	1.62	324	5.1	29.2	8.7	12.37	39.58	112	0	0	NA	0	0	0	0	0	0.22	0.11	1.42	2.83	16.4443	5.6827	16.0804	70.524	99.072
124	B	2	56	2	2	1	3	3	2	151	70	30.7	133	85	91	81	4.9	7.5	2.76	6.12	3.29	1.34	428	5.8	37.5	15.18	76.39	71.91	779.2	1	0	NA	0	0	0	0	0	0.21	0.1	5.03	10.84	4.01312	10.3245	111.874	88.2	135
125	A	1	53	1	1	3	6	1	2	158	52	20.83	138	86	72	80	5.746	6.348	1.32	5.44	3.35	1.09	379	5.4	29.1	0.22	7.52	74.14	59.69	1	0	NA	0	0	0	0	0	0	0.13	34.18	0.81	9.31983	10.6447	8.56999	103.428	114.264
126	B	2	56	2	2	2	7	3	3	150	46	20.44	113	73	73	62	6.1	9.8	1.89	4.62	2.19	1.71	211	4.5	35.3	59.43	100.92	213.7	332.6	0	0	NA	0	0	0	0	1	0.28	0.3	1.7	1.56	2.29984	30.682	47.7531	109.8	176.4
127	A	2	24	1	2	2	1	2	2	158	50	20.03	124	80	68	78	5.061	6.164	0.97	5.62	3.43	1.45	356	5.2	15.8	0.22	12.75	75.19	66.21	0	0	NA	0	0	0	0	0	0	0.19	57.95	0.88	9.95778	10.7954	9.5061	91.098	110.952
128	B	2	45	2	2	2	1	2	2	158	47	18.83	113	76	69	83	5	6.5	2.51	3.87	1.54	1.57	194	4.7	34.9	13.1	50.27	36.9	241.2	0	0	NA	0	0	0	0	0	0.36	0.21	3.84	6.54	10.0747	5.29792	34.6303	90	117
129	A	2	24	2	2	2	1	2	2	162	52	19.81	102	78	68	70	4.285	5.083	0.51	4.54	2.3	1.58	190	4.9	22.1	0.72	14.44	84.56	369.5	0	0	NA	0	0	0	0	0	0.01	0.04	20.06	4.37	6.23362	12.1407	53.051	77.13	91.494
130	B	1	54	2	2	2	7	3	1	162	64	24.39	113	71	84	66	6.4	7.5	1.73	5.53	3.45	1.35	418	5.9	61.8	15.59	38.91	161.8	319.3	0	0	NA	0	0	0	1	0	0.1	0.12	2.5	1.97	2.94086	23.2304	45.8435	115.2	135
131	A	1	25	2	2	2	1	2	2	162	66	25.15	132	77	84	80	4.723	5.604	2.49	6.16	3.94	1.05	468	5.3	24.7	18.99	90.52	96.6	670.6	1	0	NA	0	0	0	0	0	0.2	0.13	4.77	6.94	4.07042	13.8693	96.2814	85.014	100.872
132	B	2	50	2	2	2	7	3	1	151	62	27.19	123	81	85	76	7	6.5	2.14	8.01	5.18	1.87	431	6.2	49.9	54.91	130.18	390.7	1061	1	1	NA	0	0	0	0	0	0.14	0.12	2.37	2.72	1.05707	56.0948	152.333	126	117
133	A	2	24	2	2	2	1	2	2	164	55	20.45	120	95	75	80	4.404	4.287	0.55	5.88	3.03	1.98	289	5.3	27.2	4.52	39.88	58.98	201.1	0	0	NA	0	0	0	0	0	0.08	0.2	8.82	3.41	10.0998	8.46805	28.8729	79.272	77.166
135	A	2	27	1	2	2	1	2	2	163	54	20.32	110	75	80	75	4.872	4.868	0.67	4.5	2.34	1.55	312	5.3	21.5	5.33	31.1	77.24	179.7	0	0	NA	0	0	0	0	0	0.07	0.17	5.83	2.33	7.97459	11.0897	25.8004	87.696	87.624
136	B	1	60	2	2	2	7	2	2	165	60	22.04	146	84	78	81	6.3	13.2	2.01	4.27	2.08	1.49	399	6.2	42.6	11.97	70.75	19.16	257.1	0	1	NA	0	0	0	0	0	0.62	0.28	5.91	13.42	9.59697	2.7509	36.9131	113.4	237.6
137	B	2	50	2	2	2	7	3	3	151	51	22.37	118	73	72	88	4.6	7.3	2.58	6.27	3.52	1.59	266	5.4	34.1	11.55	48.31	19.86	515.6	0	0	NA	0	0	0	0	0	0.58	0.09	4.18	25.96	10.1432	2.8514	74.0273	82.8	131.4
139	B	2	62	2	2	1	6	2	2	143	58	28.36	158	79	82	60	4.2	6.4	2.46	5.13	2.53	1.56	396	5.6	44.1	11.78	49.16	58.03	334.9	0	0	NA	0	0	0	0	0	0.2	0.15	4.17	5.77	7.68099	8.33166	48.0833	75.6	115.2
140	A	2	49	2	2	2	7	3	3	147	50	23.14	120	80	70	80	4.453	5.976	1.1	4.5	2.06	1.76	303	4.9	36.7	3.14	18.04	44.13	414.7	0	0	NA	0	0	0	0	0	0.07	0.04	5.75	9.4	7.98065	6.33597	59.5406	80.154	107.568
141	B	2	62	2	2	2	1	3	3	160	61	23.83	142	85	78	85	6	5.3	2.32	6.58	2.61	2.36	216	5.7	33.4	16.73	63.63	54.72	164.2	0	0	NA	0	0	0	0	0	0.31	0.39	3.8	3	8.58713	7.85642	23.575	108	95.4
142	A	2	40	2	2	2	1	2	2	157	55	22.31	110	70	78	78	4.173	4.72	0.83	4.58	2.23	1.64	225	5.1	26.9	3.39	12.93	83.88	112.1	0	0	NA	0	0	0	0	0	0.04	0.12	3.81	1.34	9.90821	12.0431	16.0948	75.114	84.96
143	B	2	53	2	2	2	7	3	3	158	65	26.04	112	68	78	84	5.1	6	2.3	4.07	1.3	1.81	323	5.6	31.1	8.46	25.23	33.72	160.6	0	0	NA	0	0	0	0	0	0.25	0.16	2.98	4.76	12.7066	4.84135	23.0581	91.8	108
145	B	2	51	2	2	1	6	2	2	145	57	27.11	165	85	82	98	5.6	11.6	1.98	7.08	4.19	2.06	352	5.9	38.5	8.51	23.48	78.34	700.5	0	1	NA	0	0	0	0	0	0.11	0.03	2.76	8.94	3.19231	11.2477	100.574	100.8	208.8
146	A	2	37	2	2	2	1	2	2	160	60	23.44	100	70	76	70	4.758	5.929	0.49	4.82	2.78	1.44	263	5.2	29	12.11	36.98	71.33	179.6	0	0	NA	0	0	0	0	0	0.17	0.21	3.05	2.52	8.11197	10.2412	25.7861	85.644	106.722
147	B	1	51	2	2	2	7	3	3	165	58	21.3	129	77	76	98	5.3	3.8	1.92	5.35	1.89	2.48	418	5.2	55.2	9.43	27.28	26.6	57.4	0	0	NA	0	0	0	0	0	0.35	0.48	2.89	2.16	23.5743	3.8191	8.24121	95.4	68.4
148	A	2	43	2	2	2	1	2	2	150	72	32	124	75	90	70	5.099	6.732	0.66	5.41	3.32	1.39	336	5.4	29.1	6.64	28.56	93.01	391.8	0	0	NA	0	0	0	0	0	0.07	0.07	4.3	4.21	4.69218	13.3539	56.2527	91.782	121.176
149	B	2	59	2	2	1	23	2	2	151	61	26.75	141	94	85	80	5	6.9	2.42	6.39	3.83	1.54	314	5.4	40.1	14.07	75.2	71.31	432.8	0	0	NA	0	0	0	0	0	0.2	0.17	5.34	6.07	5.29154	10.2383	62.1393	90	124.2
151	B	2	53	2	2	1	7	3	3	156	53	21.78	147	81	76	87	5	5.7	2.46	4.5	2.24	1.46	313	5.7	37	12.12	51.62	64.34	390	0	0	NA	0	0	0	0	0	0.19	0.13	4.26	6.06	6.18829	9.23762	55.9943	90	102.6
152	A	2	70	1	1	1	6	3	3	152	53	22.94	130	80	80	82	6.588	9.584	4.66	8.02	4.4	1.26	245	6.5	22.5	15.01	79.73	76.76	725.6	0	0	NA	0	1	0	0	1	0.2	0.11	5.31	9.45	3.02112	11.0208	104.178	118.584	172.512
153	B	2	52	2	2	2	6	2	2	152	63	27.27	120	71	81	88	5.3	8.7	4.57	5.94	2.82	1.51	345	5.2	33.5	5.71	17.68	75.76	976.9	0	0	NA	0	0	0	0	1	0.08	0.02	3.1	12.89	3.18136	10.8772	140.258	95.4	156.6
154	A	1	42	1	1	1	6	3	2	167	69	24.74	128	80	90	76	5.273	7.637	3	6.17	4	0.83	477	6	19.1	16.29	86.95	51.78	559.2	1	0	NA	0	0	0	0	0	0.31	0.16	5.34	10.8	5.27342	7.43431	80.2872	94.914	137.466
155	B	2	57	2	2	2	1	3	3	158	49	19.63	101	67	73	71	5.2	6.2	1.9	7.17	3.33	2.51	219	5.2	32.7	9.61	29.65	35.72	153.8	0	0	NA	0	0	0	0	0	0.27	0.19	3.09	4.31	12.2163	5.1285	22.0818	93.6	111.6
157	B	2	59	2	2	2	1	3	3	160	61	23.83	162	103	87	86	5.1	5.8	2.34	6.73	3.93	1.61	405	6.3	45.8	16.16	60.26	107.6	326.2	0	0	NA	0	0	0	0	0	0.15	0.18	3.73	3.03	4.80429	15.4487	46.8342	91.8	104.4
159	B	1	52	2	2	2	7	3	3	169	82	28.71	133	72	93	67	5.1	7.2	3.24	4.99	2.76	1.22	432	5.1	43.8	14.68	62.37	106.9	611	1	0	NA	0	0	0	0	0	0.14	0.1	4.25	5.72	3.52712	15.3482	87.7243	91.8	129.6
160	A	1	68	2	2	1	7	1	1	165	66	24.24	139	60	94	80	5.047	3.728	3.62	7.19	4.55	0.75	256	6	37.5	18.92	36.23	93.1	57.4	1	0	NA	0	0	0	0	0	0.2	0.63	1.91	0.62	9.82416	13.3668	8.24121	90.846	67.104
161	B	1	63	2	2	3	7	3	3	167	55	19.72	106	68	69	82	5.4	8.3	1.94	5.4	3.15	1.35	228	5.9	43.7	4.3	12.37	36.5	431.6	0	0	NA	0	0	0	0	1	0.12	0.03	2.88	11.82	6.88344	5.24049	61.967	97.2	149.4
162	A	2	50	2	2	2	1	2	2	160	75	29.3	126	77	100	76	6.13	8.571	0.99	5.45	3.24	1.39	373	6.5	23	12.31	34.93	74.02	221.9	0	0	NA	0	1	0	0	1	0.17	0.16	2.84	3	5.50824	10.6274	31.8593	110.34	154.278
163	B	2	57	2	2	NA	7	3	3	156	56	23.01	153	86	85	91	6.9	9	2.57	5.04	2.43	1.65	387	5.7	39.5	13.38	45.88	61.7	374	0	0	NA	0	0	0	0	1	0.22	0.12	3.43	6.06	4.50629	8.85858	53.6971	124.2	162
164	A	1	39	2	2	2	1	2	2	168	70	24.8	107	70	88	76	4.864	7.688	1.01	5.77	4	0.96	447	5.1	21.3	5.13	50.54	51.18	339.3	1	0	NA	0	0	0	0	0	0.1	0.15	9.85	6.63	7.00609	7.34817	48.715	87.552	138.384
165	B	2	50	2	2	2	7	3	1	155	54	22.48	118	81	73	68	4.7	5.7	2	6.06	3.7	1.56	355	5.5	50.1	11.23	46.31	43.69	375.6	0	0	NA	0	0	0	0	0	0.26	0.12	4.12	8.6	8.17833	6.27279	53.9268	84.6	102.6
166	A	2	35	2	2	2	1	2	2	166	50	18.14	100	70	81	70	5.14	5.919	3.54	4.5	2.27	0.76	264	5.3	29.5	13.85	57.26	85.37	291.8	0	0	NA	0	0	0	0	0	0.16	0.2	4.13	3.42	5.72029	12.257	41.8952	92.52	106.542
167	B	2	56	2	2	3	7	3	2	151	62	27.19	154	102	84	82	5	6	2.43	6.35	3.57	1.72	305	6	52.2	10.44	32.8	54.15	138	0	0	NA	0	0	0	0	0	0.19	0.24	3.14	2.55	10.2301	7.77459	19.8134	90	108
168	A	1	38	2	2	2	1	2	2	185	80	23.37	128	80	89	80	4.917	7.397	1.56	5.34	3.19	1.16	534	5.2	35.8	6.05	45.31	51.65	493.3	1	0	NA	0	0	0	0	0	0.12	0.09	7.49	9.55	5.9281	7.41565	70.8256	88.506	133.146
169	B	2	78	2	2	2	7	3	3	146	48	22.52	151	72	81	92	5.9	7.3	2.95	7.59	4.18	1.99	398	6.7	40.1	11	45.95	38.11	265.5	0	0	NA	0	1	1	0	0	0.29	0.17	4.18	6.97	8.15245	5.47164	38.1192	106.2	131.4
170	A	2	64	2	2	2	1	2	3	165	70	25.71	130	85	97	75	5.769	16.18	1.32	5.19	3.07	1.21	424	6.3	28	24.1	66.14	230.8	3629	1	1	NA	0	0	0	0	0	0.1	0.02	2.74	15.72	0.728653	33.1371	521.034	103.842	291.24
171	B	2	53	NA	2	2	7	3	3	141	53	26.66	103	73	78	96	5.2	6	1.83	5.51	3	1.69	235	5.6	39	8.66	47.26	39.5	320	0	0	NA	0	0	0	0	0	0.22	0.15	5.46	8.1	8.50981	5.67121	45.944	93.6	108
172	A	1	66	2	2	2	7	2	2	180	79	24.38	128	82	100	75	5.518	8.721	2.64	6.91	4.09	1.08	497	5.4	25	24.42	87.82	96.53	768.3	1	0	NA	0	0	0	0	1	0.25	0.11	3.6	7.96	3.0217	13.8593	110.309	99.324	156.978
173	B	1	46	2	2	2	7	3	2	166	63	22.86	120	85	81	95	6.1	5.9	2.23	5.17	2.92	1.38	338	5.7	39.8	14.16	83.34	50.22	234.3	0	0	NA	0	0	0	1	0	0.28	0.36	5.89	4.67	7.56708	7.21034	33.6396	109.8	106.2
174	B	1	59	2	2	2	7	3	3	158	59	23.63	111	66	82	78	5.7	7.9	2.09	5.92	3.26	1.76	355	4.6	56.4	11.82	36.85	43.85	226.6	0	0	NA	0	0	0	0	1	0.27	0.16	3.12	5.17	8.0713	6.29576	32.5341	102.6	142.2
175	B	2	60	2	2	2	7	3	2	151	45	19.74	135	83	67	85	6.6	12.6	2.73	8.07	4.87	1.72	315	5.7	29.3	14.64	65.3	32.54	253.9	0	1	NA	0	0	0	0	0	0.45	0.26	4.46	7.8	7.12083	4.67193	36.4537	118.8	226.8
177	B	2	62	2	2	2	7	3	3	160	52	20.31	118	76	74	115	16.7	28.3	2.55	7.54	4.39	1.99	156	13.2	35.5	16.38	28.98	46.27	118.8	0	1	NA	0	1	1	0	0	0.35	0.24	1.77	2.57	3.23021	6.64322	17.0567	300.6	509.4
178	A	1	41	2	1	2	67	3	3	173	67	22.39	130	74	85	65	5.38	7.118	0.98	5.62	3.38	1.54	382	5.5	47.5	18.31	80.41	55.64	392.1	0	1	NA	1	0	0	0	0	0.33	0.21	4.39	7.05	5.97944	7.98851	56.2958	96.84	128.124
179	B	2	59	2	2	2	7	3	3	146	40	18.77	121	66	70	95	5	7.2	2.46	6.86	3.58	2.13	305	5.6	45.1	13.63	39.68	46.18	259.6	0	0	NA	0	0	0	0	0	0.3	0.15	2.91	5.62	8.33839	6.63029	37.2721	90	129.6
180	A	2	62	1	2	3	7	3	2	150	40	17.78	140	80	68	76	5.677	11.76	1.48	6.34	3.47	1.81	448	7.3	34.4	3.66	12.62	28.02	83.66	1	1	NA	0	1	1	0	0	0.13	0.15	3.45	2.99	13.9047	4.02297	12.0115	102.186	211.68
181	B	2	47	2	2	2	1	3	3	162	66	25.15	115	71	82	84	5.3	5.4	1.88	5.56	2.7	1.97	316	5.3	36.2	13.56	47.85	41.38	158.2	0	0	NA	0	0	0	0	0	0.33	0.3	3.53	3.82	11.3082	5.94113	22.7136	95.4	97.2
182	A	2	64	2	2	NA	7	3	3	160	53	20.7	125	65	78	60	10.17	12.7	1.86	7.2	4.23	1.14	272	9.7	29.3	22.18	31.67	116.5	202.6	0	1	NA	0	1	1	0	0	0.19	0.16	1.43	1.74	2.63184	16.7265	29.0883	183.06	228.6
183	B	2	50	2	2	2	7	3	2	153	57	24.35	132	82	75	100	4.6	7.9	1.85	5.31	2.81	1.65	195	4.9	26	5.14	26.37	24.14	230.2	0	0	NA	0	0	0	0	1	0.21	0.11	5.13	9.54	13.0247	3.4659	33.051	82.8	142.2
184	A	1	34	2	2	2	7	2	2	170	63	21.8	110	80	82	75	4.764	8.941	1.69	5	2.68	1.23	369	5.6	25.9	7.35	81.86	46.46	562.5	0	0	NA	0	0	0	0	1	0.16	0.15	11.14	12.11	5.69402	6.6705	80.7609	85.752	160.938
185	B	2	48	2	2	2	7	3	1	153	77	32.89	128	89	100	90	5.1	7.3	3.62	6.86	3.94	1.64	355	5.8	31.2	20.93	82.47	159.7	1094	0	0	NA	0	0	0	0	0	0.13	0.08	3.94	6.85	2.17487	22.9289	157.071	91.8	131.4
186	A	1	24	1	2	2	1	2	2	170	62	21.45	121	70	78	74	4.658	5.647	0.74	5.16	2.7	1.68	395	4.8	22.5	10.32	37.46	49.35	274.7	0	0	NA	0	0	0	0	0	0.21	0.14	3.63	5.57	8.83294	7.08543	39.4401	83.844	101.646
187	B	1	51	2	2	1	7	3	1	168	74	26.22	119	81	93	83	5.5	8.3	2.07	5.53	3.48	1.27	538	5.8	48.5	26.54	90.22	120.4	1031	1	0	NA	0	0	0	0	1	0.22	0.09	3.4	8.56	2.38579	17.2864	148.026	99	149.4
188	A	2	34	1	2	2	7	2	2	162	56	21.34	110	70	80	70	4.823	5.975	1.76	5.45	3.13	1.38	310	5.5	34.9	12.06	55.8	55.88	260.2	0	0	NA	0	0	0	0	0	0.22	0.21	4.63	4.66	8.06904	8.02297	37.3582	86.814	107.55
189	B	1	60	2	2	1	7	3	3	151	67	29.38	172	96	93	77	5	12.1	2.02	5.89	3.71	1.56	306	5.7	38.2	13.78	71.87	104.6	1045	0	1	NA	0	0	0	0	0	0.13	0.07	5.22	9.99	2.41355	15.0179	150.036	90	217.8
190	A	2	62	2	2	2	3456	1	1	155	62	25.81	130	90	90	70	5.1	8.061	2.46	5.55	3.12	1.36	624	5.4	33	11.75	61.12	92.71	402.8	1	0	NA	0	0	0	0	1	0.13	0.15	5.2	4.34	4.40717	13.3108	57.832	91.8	145.098
191	B	2	67	2	2	2	2	3	3	151	58	25.44	164	80	83	71	4.9	8.8	1.36	6.81	3.63	2.12	242	5.8	38.2	15.24	48.22	53.59	517.4	0	0	NA	0	0	0	0	1	0.28	0.09	3.16	9.65	5.39963	7.69419	74.2857	88.2	158.4
192	A	2	39	1	2	2	1	2	2	156	58	23.83	96	59	84	78	5.118	7.525	0.84	4.26	1.82	1.9	253	5.2	25.4	13.26	40.75	146.9	460.2	0	0	NA	0	0	0	0	0	0.09	0.09	3.07	3.13	3.22153	21.0912	66.0732	92.124	135.45
193	B	1	70	2	2	2	2	2	2	160	63	24.61	94	58	80	70	5.2	7.3	0.95	5.59	2.82	1.87	212	5.5	53.5	15.19	59.5	54.47	351.4	0	0	NA	0	0	0	0	0	0.28	0.17	3.92	6.45	6.4558	7.82053	50.4523	93.6	131.4
194	A	1	50	2	2	2	3	2	2	169	71	24.86	108	60	94	70	5.173	5.684	1.34	5.47	3.58	0.88	354	5.4	26.1	9.71	36.04	84.32	258.6	0	0	NA	0	0	0	0	0	0.12	0.14	3.71	3.07	6.07282	12.1062	37.1285	93.114	102.312
195	B	1	34	2	2	2	7	3	3	172	71	24	114	63	87	102	4.4	3.9	1.85	4.29	1.55	1.86	219	5.6	42.7	19.14	47	70.01	93.22	0	0	NA	0	0	0	0	0	0.27	0.5	2.46	1.33	11.9793	10.0517	13.3841	79.2	70.2
196	A	2	23	1	2	2	1	1	3	158	50	20.03	103	74	68	88	4.516	4.533	1.07	4.29	2.39	1.22	231	5.4	29	2.14	25.82	50.02	240.5	1	0	NA	0	0	0	0	0	0.04	0.11	12.07	4.81	10.0425	7.18162	34.5298	81.288	81.594
197	B	2	50	2	2	2	6	2	1	153	60	25.63	124	76	81	96	4.8	7.4	1.68	6.25	3.67	1.6	353	5.1	45.5	7.78	43.39	44.29	609.4	0	0	NA	0	0	0	0	0	0.18	0.07	5.58	13.76	5.94346	6.35894	87.4946	86.4	133.2
199	B	1	41	2	2	1	7	3	3	160	64	25	147	105	89	91	5.2	5.4	2.61	6.89	4.12	1.69	469	5.3	35.7	6.75	30.42	74.95	492.7	1	0	NA	0	0	0	0	0	0.09	0.06	4.51	6.57	5.05357	10.7609	70.7394	93.6	97.2
201	B	2	64	2	2	1	1	3	3	154	52	21.93	168	87	79	85	8.1	14.2	3.09	6.29	3.33	1.71	344	7.8	35.7	21.98	53.4	68.61	368.2	0	1	NA	0	1	1	0	0	0.32	0.15	2.43	5.37	3.32616	9.85068	52.8643	145.8	255.6
202	A	1	27	2	2	2	7	2	2	160	60	23.44	135	80	85	78	4.611	10.41	1.29	5.89	3.64	1.36	572	5.2	20.8	15.34	136.51	73.83	1627	1	0	NA	0	0	0	0	1	0.21	0.08	8.9	22.04	2.62413	10.6001	233.597	82.998	187.38
203	B	2	66	2	2	1	7	3	1	154	59	24.88	158	56	74	75	6.1	10.2	1.85	6.21	3.3	1.81	433	4.7	47.6	14.31	33.08	59.76	152.1	1	0	NA	0	0	0	0	1	0.24	0.22	2.31	2.55	6.89747	8.58004	21.8378	109.8	183.6
204	A	1	65	2	2	2	1	3	3	160	55	21.48	117	75	90	70	6.012	5.976	2.45	5.53	3.03	1.13	500	6.5	54.3	23.11	56.12	62.03	178.7	1	0	NA	0	1	0	0	0	0.37	0.31	2.43	2.88	7.45984	8.90596	25.6569	108.216	107.568
205	B	1	79	2	2	1	1	2	2	150	52	23.11	185	68	80	89	4.9	8.8	1.23	5.68	3.48	1.5	446	5.4	64.1	12.32	35.02	42.73	173.7	1	0	NA	0	0	0	0	1	0.29	0.2	2.84	4.07	9.82189	6.13496	24.939	88.2	158.4
206	B	2	25	1	2	2	7	3	2	165	43	15.79	102	83	60	107	4.5	7.4	2.15	5.5	2.55	1.98	220	5.2	20.9	9.47	27.15	50.44	351.1	0	0	NA	0	0	0	0	0	0.19	0.08	2.87	6.96	7.43099	7.24192	50.4092	81	133.2
208	B	2	37	2	2	2	7	3	3	164	64	23.8	111	72	87	95	5.6	6.4	2.1	6.12	3.83	1.48	212	5.3	26.5	11.79	20.55	84.11	269.6	0	0	NA	0	0	0	0	0	0.14	0.08	1.74	3.21	5.47327	12.0761	38.7078	100.8	115.2
209	A	2	27	2	2	2	1	2	2	158	51	20.43	104	67	68	76	4.517	5.401	1.22	5.46	2.62	1.98	210	5.1	23.6	2.82	17.65	51.79	351.8	0	0	NA	0	0	0	0	0	0.05	0.05	6.26	6.79	7.99739	7.43575	50.5097	81.306	97.218
210	B	1	75	2	2	1	7	3	3	165	52	19.1	144	72	75	60	6.2	11.4	1.62	5.53	2.91	1.67	487	5.4	52.1	5.53	15.19	29.81	159.7	1	1	NA	0	0	0	0	0	0.19	0.1	2.75	5.36	9.85665	4.27997	22.9289	111.6	205.2
211	A	2	52	2	2	2	1	2	2	150	45	20	114	76	66	80	5.223	7.274	0.59	6.24	3.48	2	198	5.7	30.5	3.31	37.3	33.8	287.7	0	0	NA	0	0	0	0	0	0.1	0.13	11.27	8.51	9.18897	4.85284	41.3065	94.014	130.932
212	B	2	74	2	2	2	1	3	3	155	62	25.81	107	69	93	71	5.2	8	2.79	3.79	3.15	1.58	219	5.5	42.3	7.39	21.78	48.19	274.9	0	0	NA	0	0	0	0	1	0.15	0.08	2.95	5.7	7.486	6.91888	39.4688	93.6	144
213	A	1	30	2	2	2	7	2	2	173	70	23.39	112	72	90	80	4.911	6.421	1.97	4.74	2.65	1.13	317	5.1	31.6	10.54	42.64	85.52	367	0	0	NA	0	0	0	0	0	0.12	0.12	4.05	4.29	5.27336	12.2785	52.692	88.398	115.578
214	B	1	55	2	2	2	7	3	3	161	71	27.39	99	73	90	87	6.2	7	3.63	6.14	3.5	1.32	415	6.5	48.1	19.68	27.77	48.39	146.7	0	0	NA	0	1	0	1	0	0.41	0.19	1.41	3.03	8.80441	6.9476	21.0625	111.6	126
215	A	2	36	2	2	2	1	2	2	150	45	20	121	76	68	78	5.099	7.792	2.1	4.85	2.64	1.02	376	5.2	27.2	3.48	36.21	25.7	337.4	0	0	NA	0	0	0	0	0	0.14	0.11	10.41	13.13	9.88128	3.68988	48.4422	91.782	140.256
216	B	2	55	2	2	2	7	3	3	145	54	25.68	131	71	75	80	5.4	6.4	1.58	5.72	3.05	1.81	298	5.5	51.8	11.9	24.98	74.94	316.9	0	0	NA	0	0	0	0	0	0.16	0.08	2.1	4.23	5.65756	10.7595	45.4989	97.2	115.2
217	A	2	35	2	2	2	1	2	2	160	50	19.53	121	76	68	78	5.315	8.01	1.23	5.8	3.14	1.72	235	4.9	26.2	16.77	102.75	121	589.5	0	0	NA	0	0	0	0	1	0.14	0.17	6.13	4.87	3.13631	17.3726	84.6375	95.67	144.18
218	B	1	33	2	2	2	7	3	3	164	55	20.45	103	57	73	68	4.1	5.1	2.25	5.47	2.96	1.65	448	5.5	65.3	5.83	17.14	15.91	121.7	1	0	NA	0	0	0	0	0	0.37	0.14	2.94	7.65	26.9298	2.28428	17.4731	73.8	91.8
219	B	2	56	2	2	1	1	2	1	160	63	24.61	150	103	80	82	5.8	7.2	6.04	4.67	1.72	1.11	332	6	43	22.6	43.77	207.2	2094	0	0	NA	0	0	0	0	0	0.11	0.02	1.94	10.11	1.29069	29.7487	300.646	104.4	129.6
220	A	2	26	2	2	2	1	2	2	160	46	17.97	110	70	65	70	4.633	3.796	0.52	4.5	1.94	2	215	4.9	13.8	8.23	13.61	38.96	37.66	0	0	NA	0	0	0	0	0	0.21	0.36	1.65	0.97	22.6662	5.59368	5.40704	83.394	68.328
221	B	2	58	1	2	NA	1	2	1	158	64	25.64	148	79	83	87	5.6	8.9	1.86	5.46	3.14	1.59	336	6.1	41.3	13.73	39.13	78.17	380.9	0	0	NA	0	0	0	0	1	0.18	0.1	2.85	4.87	4.53358	11.2233	54.6877	100.8	160.2
222	B	2	53	2	2	2	7	2	1	152	68	29.43	126	77	86	74	4.7	6.3	1.77	5.18	2.78	1.64	311	5.5	32.6	14	33.51	49.14	179	0	0	NA	0	0	0	0	0	0.28	0.19	2.39	3.64	10.1652	7.05528	25.6999	84.6	113.4
223	A	2	44	2	2	2	1	2	2	157	53	21.5	110	70	64	85	5.946	7.202	1.19	5.74	3.34	1.61	382	5.9	35.9	7.18	47.17	77.12	769.7	0	0	NA	0	0	0	0	0	0.09	0.06	6.57	9.98	3.42497	11.0725	110.51	107.028	129.636
224	B	1	61	2	2	1	2	2	2	166	72	26.13	133	91	90	77	5.6	9	2.27	5.1	2.83	1.41	413	6.1	57.7	27.75	105.96	87.85	1594	0	0	NA	0	0	0	0	1	0.32	0.07	3.82	18.14	2.22661	12.6131	228.859	100.8	162
225	A	1	40	2	2	2	1	1	2	169	58	20.31	120	70	65	85	4.93	5.4	0.77	6.06	3.97	1.26	393	5.5	38.7	6.64	32.6	65.23	727.9	1	0	NA	0	0	0	0	0	0.1	0.04	4.91	11.16	4.7677	9.3654	104.508	88.74	97.2
226	B	2	64	2	2	1	7	3	3	146	50	23.46	141	87	78	83	4.9	7.2	3.37	5.7	3.28	1.43	497	5.8	50.5	26.85	126.67	98.8	800.6	1	0	NA	0	0	0	0	0	0.27	0.16	4.72	8.1	3.37158	14.1852	114.946	88.2	129.6
227	A	2	36	1	2	3	7	2	2	161	60	23.15	110	70	68	80	4.675	4.512	1.07	5.72	3.42	1.48	262	5.6	30.8	5.29	28.49	52.48	119.1	0	0	NA	0	0	0	0	0	0.1	0.24	5.39	2.27	12.4443	7.53482	17.0998	84.15	81.216
228	B	2	53	2	2	2	7	3	3	158	54	21.63	89	55	73	77	5.9	6.7	1.75	5.26	2.62	1.88	278	5.8	34.5	12.97	37.39	49.1	232.9	0	0	NA	0	0	0	0	0	0.26	0.16	2.88	4.74	7.62785	7.04953	33.4386	106.2	120.6
229	A	2	46	2	2	2	1	2	2	150	51	22.67	120	70	69	86	5.503	8.916	0.52	6.09	3.68	1.6	308	6.1	39.6	0.22	6.95	75.4	470.5	0	0	NA	0	0	0	0	1	0	0.01	31.59	6.24	4.28222	10.8256	67.552	99.054	160.488
230	B	2	77	2	2	1	7	3	3	150	53	23.56	188	79	84	88	6.2	17.1	2.53	6.72	3.99	1.6	336	7.1	47.3	33.24	87.04	80.76	803.6	0	1	NA	0	1	1	0	0	0.41	0.11	2.62	9.95	2.40931	11.5951	115.377	111.6	307.8
231	B	2	66	2	2	2	7	3	3	148	49	22.37	113	63	73	79	5	7.3	2.57	5.98	3.11	7.76	330	5.1	35.2	10.78	31.77	44.94	370.3	0	0	NA	0	0	0	0	0	0.24	0.09	2.95	8.24	7.22395	6.45226	53.1658	90	131.4
232	A	1	29	1	2	2	7	2	2	166	72	26.13	120	70	91	76	5.806	8.797	1.57	5.62	3.56	1.12	648	5.7	30.9	13.91	102.52	77.63	714.3	1	0	NA	0	0	0	0	1	0.18	0.14	7.37	9.2	3.3897	11.1457	102.556	104.508	158.346
233	B	2	80	2	2	1	7	3	3	151	54	23.68	151	91	82	115	5.9	7.8	2.02	7.72	4.87	1.7	293	6	35.2	11.97	42.42	43.4	207.7	0	0	NA	0	0	0	0	1	0.28	0.2	3.54	4.79	8.24563	6.23116	29.8205	106.2	140.4
234	A	2	28	2	2	2	1	2	2	162	52	19.81	87	56	84	NA	4.351	6.007	2.2	4.84	2.82	1.01	238	4.3	19.9	4.06	20.96	138	593.9	0	0	NA	0	0	0	0	0	0.03	0.04	5.16	4.3	3.62728	19.8134	85.2692	78.318	108.126
235	B	2	77	2	2	1	3	3	3	146	60	28.15	157	90	91	67	7.3	15.7	2.31	3.63	1.47	1.31	330	6.9	35.8	16.79	46.7	48.47	169.5	0	1	NA	0	1	1	0	0	0.35	0.28	2.78	3.5	5.81057	6.95908	24.336	131.4	282.6
237	B	1	83	2	2	1	7	3	3	157	50	20.28	136	79	77	74	4.8	7.9	2.01	4.48	1.89	1.71	484	5.6	55.8	6.01	14.33	31.92	169	1	0	NA	0	0	0	0	1	0.19	0.08	2.38	5.29	12.3769	4.58291	24.2642	86.4	142.2
238	A	2	26	2	2	2	1	2	2	170	58	20.07	128	75	89	75	4.807	7.189	1.09	4.66	2.89	1.09	254	5.5	32.1	9.54	51.87	117.3	1765	0	0	NA	0	0	0	0	0	0.08	0.03	5.44	15.05	2.16885	16.8413	253.41	86.526	129.402
239	B	2	54	2	2	2	7	3	3	161	56	21.6	126	71	76	87	5.5	8.2	2.8	7.28	4.65	1.65	380	6.1	29.5	10.78	28.16	70.31	549.7	0	0	NA	0	0	0	0	1	0.15	0.05	2.61	7.82	4.27001	10.0948	78.9232	99	147.6
240	B	2	32	2	2	2	7	3	3	148	59	26.94	103	60	84	97	4.6	2.8	1.75	5.65	2.83	1.87	319	5.4	42.6	4.52	10.06	60.23	48.7	0	0	NA	0	0	0	0	0	0.08	0.21	2.23	0.81	16.3758	8.64752	6.9921	82.8	50.4
241	A	2	62	2	2	2	1	2	2	165	65	23.88	126	76	80	75	5.461	6.7	1.49	6.72	4	1.78	248	5.6	26.3	3.07	28.68	34.81	286.1	0	0	NA	0	0	0	0	0	0.09	0.1	9.34	8.22	8.98492	4.99785	41.0768	98.298	120.6
242	B	2	60	2	2	2	7	3	3	150	58	25.78	144	74	83	66	5.7	7	2.42	6.88	4.29	1.55	262	6	24.4	5.03	11.14	64.35	294.5	0	0	NA	0	0	0	0	0	0.08	0.04	2.21	4.58	5.98561	9.23905	42.2828	102.6	126
244	B	2	59	2	2	2	7	3	1	153	52	22.21	117	62	77	70	4.9	7.1	2.08	5.04	2.41	1.66	274	5	50.3	11.89	40.66	37.65	642.9	0	0	NA	0	0	0	0	0	0.32	0.06	3.42	17.08	6.30489	5.4056	92.3044	88.2	127.8
245	A	2	32	2	2	2	1	2	2	165	53	19.47	110	75	65	80	4.602	6.477	0.92	5.05	2.58	1.75	209	5.1	35.1	8.77	48.95	72.74	464.9	0	0	NA	0	0	0	0	0	0.12	0.11	5.58	6.39	5.48053	10.4436	66.748	82.836	116.586
246	B	2	56	1	2	2	7	2	2	160	66	25.78	90	59	80	89	4.8	6.7	2.08	5.67	2.8	1.85	300	5.4	33	15.38	53.9	48.82	225.4	0	0	NA	0	0	0	0	0	0.32	0.24	3.5	4.62	9.00245	7.00933	32.3618	86.4	120.6
247	A	2	25	1	2	2	1	2	2	166	60	21.77	110	65	68	80	4.952	5.521	0.59	5.75	2.82	2.17	309	5.2	22.7	12.61	41.77	68	272.2	0	0	NA	0	0	0	0	0	0.19	0.15	3.31	4	7.06531	9.7631	39.0811	89.136	99.378
248	B	1	55	2	2	1	2	2	2	155	54	22.48	142	65	79	65	5.1	8.7	3.19	5.71	3.43	1.27	381	5.6	47	14.52	59.55	96.14	806.1	0	0	NA	0	0	0	0	1	0.15	0.07	4.1	8.38	3.13214	13.8033	115.736	91.8	156.6
249	B	2	48	2	2	2	7	3	1	165	57	20.94	113	81	73	73	4.5	7.2	2.23	5.4	3.04	1.53	398	5.2	38.9	22.5	82.96	132.2	935.5	0	0	NA	0	0	0	0	0	0.17	0.09	3.69	7.08	2.83883	18.9806	134.314	81	129.6
250	B	2	77	2	2	1	7	3	3	150	49	21.78	156	73	80	89	5.7	9.3	5.49	6.51	2.75	1.42	408	5.8	34.7	14.24	52.73	67.47	616.1	0	0	NA	0	0	0	0	1	0.21	0.09	3.7	9.13	3.89716	9.68701	88.4566	102.6	167.4
251	A	2	50	1	1	2	1	2	2	152	52	22.51	90	60	80	72	8.959	18.59	1.7	5.72	3.51	1.45	377	7.6	17.6	26.95	101	67.83	524.1	0	1	NA	1	1	1	0	0	0.4	0.19	3.75	7.73	2.45838	9.73869	75.2477	161.262	334.62
252	B	2	49	2	2	1	7	2	1	164	73	27.14	143	92	87	94	5.1	6	2.03	5.89	3.19	1.72	315	5.2	25.1	22.41	61.41	99.97	664.7	0	0	NA	0	0	0	0	0	0.22	0.09	2.74	6.65	3.72015	14.3532	95.4343	91.8	108
253	A	2	44	2	2	2	1	2	2	159	55	21.76	95	65	76	84	4.863	7.23	0.62	5.06	3.07	1.34	296	5.5	26	9.84	28.06	40.22	172.1	0	0	NA	0	0	0	0	0	0.24	0.16	2.85	4.28	10.9205	5.77459	24.7093	87.534	130.14
254	B	2	65	1	2	2	1	3	3	148	51	23.28	142	59	79	94	9.1	14.1	3.4	5.27	2.47	1.59	297	11.1	42.1	102.88	84.32	284.1	269.2	0	1	NA	0	1	1	0	0	0.36	0.31	0.82	0.95	1.34338	40.7897	38.6504	163.8	253.8
255	A	2	55	2	2	2	1	2	2	156	60	24.65	120	70	85	72	5.995	7.578	0.99	5.76	3.44	1.46	351	6.4	34.8	20.81	52.16	243.5	2027	0	0	NA	0	1	0	0	0	0.09	0.03	2.51	8.32	1.15381	34.9605	291.027	107.91	136.404
256	B	2	50	2	2	2	7	2	1	160	54	21.09	94	48	77	89	4.6	6.1	1.52	4.17	1.81	1.59	333	5.1	26.5	10.42	36.76	46.92	298.6	0	0	NA	0	0	0	0	0	0.22	0.12	3.53	6.36	8.66348	6.73654	42.8715	82.8	109.8
257	A	1	58	2	2	2	1	2	2	169	51	17.86	120	70	70	70	5.501	5.104	1.38	6.09	3.42	1.6	270	5.3	46.4	11.63	38.01	29.81	166.6	0	0	NA	0	0	0	0	0	0.39	0.23	3.27	5.59	13.2416	4.27997	23.9196	99.018	91.872
258	B	2	59	2	2	2	7	3	3	157	65	26.37	131	73	79	73	4.8	6.3	1.5	5.16	2.75	1.6	319	5.7	40.5	7.57	17.34	50.65	245.7	0	0	NA	0	0	0	0	0	0.15	0.07	2.29	4.85	8.65375	7.27207	35.2764	86.4	113.4
259	A	2	31	2	2	2	1	2	2	160	63	24.61	91	65	85	75	4.661	6.129	1.04	5.26	2.96	1.39	283	5.3	21.1	6.99	23.02	65.63	582.6	0	0	NA	0	0	0	0	0	0.11	0.04	3.29	8.88	5.29069	9.42283	83.6468	83.898	110.322
260	B	2	58	2	2	2	7	3	1	151	68	29.82	132	73	86	78	5.1	7.3	2.41	6.07	3.52	1.09	281	6.4	45.6	21.12	91.01	83.31	814.4	0	0	NA	0	1	0	0	0	0.25	0.11	4.31	9.78	3.55849	11.9612	116.927	91.8	131.4
261	A	2	30	1	2	2	1	2	2	158	80	32.05	104	65	97	56	4.81	5.219	1.15	4.93	3.15	1.03	432	5.4	19.8	13.85	43.01	101.2	605.4	1	0	NA	0	0	0	0	0	0.14	0.07	3.11	5.98	4.16678	14.5298	86.9203	86.58	93.942
262	B	2	54	2	2	2	7	3	3	152	59	25.54	121	83	82	110	5.1	9	3.08	7.05	3.59	2.14	273	4.1	43.3	6.66	17.84	72.77	415.1	0	0	NA	0	0	0	0	1	0.09	0.04	2.68	5.7	4.84346	10.448	59.598	91.8	162
263	A	2	39	1	2	2	1	2	2	156	57	23.42	110	90	76	80	4.76	4.598	0.49	5	2.43	1.92	297	5.3	29.1	15.35	78.48	44.63	288.8	0	0	NA	0	0	0	0	0	0.34	0.27	5.11	6.47	9.50534	6.40775	41.4645	85.68	82.764
264	B	1	68	2	2	2	7	3	3	166	52	18.87	128	87	69	79	5.8	7.7	1.86	5.14	3.02	1.29	335	5.7	50.3	5.38	18.1	23.84	198	0	0	NA	0	0	0	0	0	0.23	0.09	3.36	8.31	12.0261	3.42283	28.4279	104.4	138.6
265	A	2	45	1	2	2	7	3	3	152	75	32.46	116	68	98	70	4.846	5.05	2.27	6.54	4.12	1.22	420	5.8	31.2	18.79	52.96	149.4	224.1	0	0	NA	0	0	0	0	0	0.13	0.24	2.82	1.5	4.73082	21.4501	32.1752	87.228	90.9
266	B	2	64	1	2	2	7	3	3	136	52	28.11	110	65	78	61	4.9	5.2	1.73	6.75	3.74	1.82	279	6	41.4	9.61	9.84	26.9	137.4	0	0	NA	0	0	0	0	0	0.36	0.07	1.02	5.11	16.5472	3.86217	19.7272	88.2	93.6
267	A	2	46	2	2	2	1	2	2	152	64	27.7	128	78	88	78	5.32	7.054	1.53	5.21	3.04	1.38	325	5.5	19.7	33.35	97.48	206.3	1177	0	0	NA	0	0	0	0	0	0.16	0.08	2.92	5.71	1.7855	29.6195	168.988	95.76	126.972
268	B	2	41	2	2	2	7	3	3	155	58	24.14	105	75	74	94	4.8	8	2.47	4.49	2.32	1.44	367	5.9	33.4	12.45	45.75	45.87	205.3	0	0	NA	0	0	0	0	1	0.27	0.22	3.67	4.48	9.19824	6.58579	29.476	86.4	144
269	A	1	33	2	2	2	1	2	3	170	58	20.07	123	74	88	75	5.059	7.23	0.98	5.23	3.23	1.37	406	5.8	21.8	13.3	59	56.55	440.7	0	0	NA	0	0	0	0	0	0.24	0.13	4.44	7.79	5.85308	8.11917	63.2735	91.062	130.14
270	B	1	57	1	2	1	7	3	1	160	75	29.3	148	94	95	86	4.9	7.8	3.08	5.12	2.61	1.39	376	4.5	51.3	25.91	113.53	79.79	763.1	0	0	NA	0	0	0	0	1	0.32	0.15	4.38	9.56	3.78285	11.4559	109.562	88.2	140.4
272	B	1	36	1	2	2	6	3	3	161	71	27.39	113	79	93	NA	5	5.8	3.82	5.37	2.7	1.22	448	5.4	68.3	20.25	74.14	53.16	292.5	1	0	NA	0	0	0	0	0	0.38	0.25	3.66	5.5	7.76899	7.63245	41.9957	90	104.4
273	A	2	48	2	2	2	7	2	3	153	65	27.77	98	60	85	70	4.967	5.464	1.31	4.89	2.77	1.31	489	5	25.7	13.91	39.12	49.27	203.9	1	0	NA	0	0	0	0	0	0.28	0.19	2.81	4.14	9.62656	7.07394	29.2749	89.406	98.352
274	B	2	37	1	1	1	7	3	3	149	50	22.52	111	72	76	70	4.8	5.7	1.87	4.98	2.47	1.64	323	4.9	38.8	7.87	22.99	56.51	291.2	0	0	NA	0	0	0	0	0	0.14	0.08	2.92	5.15	7.77664	8.11342	41.809	86.4	102.6
276	B	1	73	2	2	1	7	3	3	159	63	24.92	179	84	87	64	6.7	11.6	1.98	5.9	3.63	1.35	447	6.1	56.3	19.17	68.34	85.17	738.1	1	1	NA	0	0	0	0	0	0.23	0.09	3.56	8.67	2.63938	12.2283	105.973	120.6	208.8
277	A	1	30	2	2	2	7	2	2	170	70	24.22	110	75	90	80	4.574	5.337	2.17	6.95	4.62	1.03	343	15.6	24	10.55	30.77	95.37	518.7	0	0	NA	0	1	1	0	0	0.11	0.06	2.92	5.44	4.7496	13.6927	74.4724	82.332	96.066
278	B	2	47	2	2	2	7	3	3	153	46	19.65	111	72	66	87	4.8	5.6	1.91	5.15	2	2.16	272	5.5	40.7	9.63	28.11	30.88	193.8	0	0	NA	0	0	0	0	0	0.31	0.15	2.92	6.28	13.1498	4.4336	27.8248	86.4	100.8
279	A	1	45	2	2	1	7	3	3	172	80	27.04	130	85	100	75	4.667	3.981	1.68	5.17	3	1.38	414	5.1	31.3	12.18	17.32	49.1	83.68	0	0	NA	0	0	0	0	0	0.25	0.21	1.42	1.7	15.0867	7.04953	12.0144	84.006	71.658
280	B	2	70	2	2	1	7	3	3	151	58	25.44	119	77	86	111	4.8	10.1	1.76	6.74	3.91	1.89	319	5.6	41.5	17.52	82.79	68.61	949.3	0	0	NA	0	0	0	0	1	0.26	0.09	4.73	13.84	3.46271	9.85068	136.296	86.4	181.8
281	A	2	43	2	2	2	1	2	2	157	63	25.56	120	88	90	78	5.173	5.184	0.79	4.66	2.59	1.36	301	5.2	36.4	21.52	98.88	73.55	458	0	0	NA	0	0	0	0	0	0.29	0.22	4.59	6.23	5.34721	10.5599	65.7574	93.114	93.312
282	B	2	54	2	1	2	7	3	3	150	65	28.89	96	66	94	77	8.9	14	3.33	7.49	4.41	1.75	260	13.5	38.6	16.83	45.64	52.41	293.4	0	1	NA	0	1	1	0	0	0.32	0.16	2.71	5.6	4.02661	7.52477	42.1249	160.2	252
283	A	2	48	2	2	2	1	2	2	152	53	22.94	100	75	85	78	4.574	7.382	0.86	4.33	1.83	2.03	257	5.3	25.1	9.32	18.48	35.39	166.3	0	0	NA	0	0	0	0	0	0.26	0.11	1.98	4.7	12.3867	5.08112	23.8765	82.332	132.876
284	B	2	59	2	2	1	6	1	3	153	58	24.78	149	93	84	84	5.2	6.5	2	5.24	2.26	1.96	379	6.1	46.6	5.45	15.02	49.33	202.3	1	0	NA	0	0	0	0	0	0.11	0.07	2.76	4.1	8.90527	7.08256	29.0452	93.6	117
285	A	1	73	2	2	2	1	2	2	162	58	22.1	120	70	80	72	4.356	7.44	0.96	5.29	3.18	1.32	466	5.4	45.9	15.41	71.16	28.12	441.5	1	0	NA	0	0	0	0	0	0.55	0.16	4.62	15.7	9.39477	4.03733	63.3884	78.408	133.92
286	B	1	57	2	2	2	7	3	1	160	64	25	125	87	83	108	5	6.2	2.89	6.35	3.83	1.4	525	5.7	58.9	15.26	47.11	46.22	86.96	1	0	NA	0	0	0	0	0	0.33	0.54	3.09	1.88	13.1811	6.63604	12.4853	90	111.6
287	A	2	63	2	2	2	2	2	2	152	61	26.4	116	68	75	70	7.32	12.7	2.72	5.73	3.42	1.19	418	8.3	39.7	20.48	56.7	91.62	423.8	0	1	NA	0	1	1	0	0	0.22	0.13	2.77	4.63	2.94181	13.1543	60.8471	131.76	228.6
288	B	2	43	2	2	2	7	3	3	151	51	22.37	105	65	72	91	4.9	6.7	2.24	6.58	4.2	1.47	231	5.5	43.1	10.99	55.55	27.45	88.87	0	0	NA	0	0	0	0	0	0.4	0.63	5.05	3.24	18.1657	3.94113	12.7595	88.2	120.6
289	A	2	42	2	2	2	1	2	2	155	46	19.15	118	71	70	69	4.39	4.927	0.77	3.79	1.75	1.57	160	5.7	29.8	11.44	37.72	26.94	172	0	0	NA	0	0	0	0	0	0.42	0.22	3.3	6.38	16.5291	3.86791	24.6949	79.02	88.686
290	B	2	40	2	2	2	1	3	1	158	70	28.04	106	67	81	90	5.3	6.1	1.81	5	2.61	1.48	276	5.5	48.5	11.24	27.41	54.54	48.89	0	0	NA	0	0	0	0	0	0.21	0.56	2.44	0.9	13.2558	7.83058	7.01938	95.4	109.8
291	A	1	40	2	2	2	7	3	3	166	70	25.4	110	68	70	65	4.407	7.139	1.88	4.31	2.29	1.19	433	5.4	26.4	14.28	82.66	99.25	1311	1	0	NA	0	0	0	0	0	0.14	0.06	5.79	13.21	2.89987	14.2498	188.227	79.326	128.502
292	B	2	54	1	1	1	1	3	3	155	59	24.56	172	96	82	80	8.4	12.9	2.68	5.08	2.66	1.3	267	7.5	33.9	21.85	49.21	91.84	313.4	0	1	NA	0	1	1	0	0	0.24	0.16	2.25	3.41	2.999	13.1859	44.9964	151.2	232.2
293	A	2	40	2	2	2	7	3	3	160	50	19.53	120	72	88	72	5.006	16.53	0.92	4.4	2.51	1.31	330	6.8	16	16.26	74.11	78.01	532.7	0	1	NA	0	1	1	0	0	0.21	0.14	4.56	6.83	3.41474	11.2003	76.4824	90.108	297.54
294	B	2	44	2	2	2	7	3	1	154	60	25.3	120	72	80	82	4.6	7	1.64	5.48	2.39	2.01	373	5.4	26.8	7.43	26.61	35.13	301.9	0	0	NA	0	0	0	0	0	0.21	0.09	3.58	8.59	9.73638	5.04379	43.3453	82.8	126
295	A	2	44	1	2	2	1	2	2	159	65	25.71	120	80	75	66	4.7	8.269	0.92	5.03	2.53	1.78	322	2.9	27.2	9.64	36.62	70.54	729.9	0	0	NA	0	0	0	0	1	0.14	0.05	3.8	10.35	4.17152	10.1278	104.795	84.6	148.842
296	A	2	42	2	2	2	1	2	2	155	65	27.06	125	70	70	78	5.241	7.214	0.71	5.03	3.11	1.32	295	5.5	26.4	24.98	81.56	101.7	428.6	0	0	NA	0	0	0	0	0	0.25	0.19	3.27	4.21	4.12457	14.6016	61.5363	94.338	129.852
297	A	2	39	2	2	2	1	2	2	160	53	20.7	104	71	71	91	4.8	5.366	0.36	4.85	2.56	1.73	218	5.2	20.1	11.74	33.12	57.1	215.5	0	0	NA	0	0	0	0	0	0.21	0.15	2.82	3.77	8.87977	8.19813	30.9404	86.4	96.588
298	B	2	66	2	2	2	7	3	3	146	58	27.21	128	67	87	84	5.4	6	2.82	5.41	2.57	1.72	302	4.9	44.6	8.39	28.22	42.8	180.9	0	0	NA	0	0	0	0	0	0.2	0.16	3.36	4.23	10.0803	6.14501	25.9727	97.2	108
299	A	2	38	2	2	2	1	2	2	159	51	20.17	110	75	68	72	4.389	7.183	0.71	4.57	2.53	1.48	185	5.3	31.7	3.61	35.73	90.31	484.4	0	0	NA	0	0	0	0	0	0.04	0.07	9.9	5.36	4.7665	12.9663	69.5477	79.002	129.294
300	B	2	37	2	2	2	7	3	3	162	60	22.86	124	74	77	82	5.3	7	2.11	5.83	3.41	1.41	344	5.2	32.1	13.04	38.89	85.62	625.6	0	0	NA	0	0	0	0	0	0.15	0.06	2.98	7.31	3.88417	12.2929	89.8205	95.4	126
301	A	2	47	1	2	1	1	2	1	155	77	32.05	120	90	90	85	5.473	5.098	1.06	4.73	2.65	1.34	366	5.5	22.1	21.08	46.99	186.4	236.3	0	0	NA	0	0	0	0	0	0.11	0.2	2.23	1.27	3.62467	26.7624	33.9268	98.514	91.764
302	B	2	53	2	2	2	1	3	2	150	61	27.11	136	79	79	89	5.5	7	2.64	4.74	2.38	1.39	329	5.8	42	12.48	29.53	61.5	321.1	0	0	NA	0	0	0	0	0	0.2	0.09	2.37	5.22	6.0846	8.82986	46.1019	99	126
303	A	2	42	2	2	2	1	2	2	153	53	22.64	104	81	75	89	4.975	5.305	0.7	4.21	2.49	1.17	297	5.3	18.8	13.81	53.45	48.47	157	0	0	NA	0	0	0	0	0	0.28	0.34	3.87	3.24	10.8436	6.95908	22.5413	89.55	95.49
304	B	2	53	2	2	2	1	3	1	150	50	22.22	124	71	73	102	6.6	11.7	1.5	5.69	2.58	2.05	211	6.1	32.1	12.47	42.08	34.83	410.5	0	1	NA	0	0	0	0	0	0.36	0.1	3.37	11.79	5.6541	5.00072	58.9375	118.8	210.6
305	A	1	59	1	2	2	1	2	2	162	72	27.43	135	72	94	88	6.083	10.48	0.89	5	3	1.31	375	6.3	46.1	15.71	65.87	37.39	311.9	0	0	NA	0	0	0	0	1	0.42	0.21	4.19	8.34	6.74651	5.36827	44.781	109.494	188.64
306	B	1	60	2	2	2	7	3	3	164	49	18.22	116	76	64	101	4.2	7.6	2.96	4.65	2.38	1.32	298	5.7	36.6	39.25	39.35	206	268.1	0	0	NA	0	0	0	0	0	0.19	0.15	1	1.3	3.51758	29.5765	38.4925	75.6	136.8
307	B	1	49	2	2	2	1	2	2	164	76	28.26	118	59	88	72	6	8.6	2.21	5.25	3.07	1.29	465	6.2	42.2	15.04	46.19	71.13	479	1	0	NA	0	0	0	0	1	0.21	0.1	3.07	6.73	4.17992	10.2125	68.7724	108	154.8
308	A	2	47	2	2	2	1	2	2	160	50	19.53	110	70	70	NA	4.844	4.978	1.74	5.06	3.09	0.97	331	4.5	36	4.82	26.16	73.2	196.9	0	0	NA	0	0	0	0	0	0.07	0.13	5.43	2.69	7.97919	10.5097	28.2699	87.192	89.604
309	B	2	71	2	2	1	7	3	1	159	58	22.94	167	92	81	81	7.3	16.7	5.37	6.49	2.85	1.48	363	7.6	26.9	12.03	28.42	78.03	427.4	0	1	NA	0	1	1	0	0	0.15	0.07	2.36	5.48	2.94408	11.2032	61.364	131.4	300.6
310	A	2	66	2	2	2	1	3	3	162	66	25.15	116	70	100	69	5.204	7.11	0.85	5.67	3.33	1.53	293	5.9	23.5	9.86	36.44	34.36	170.2	0	0	NA	0	0	0	0	0	0.29	0.21	3.7	4.95	11.5312	4.93324	24.4365	93.672	127.98
312	B	2	54	1	1	2	1	3	3	152	61	26.4	122	59	90	70	6.4	8.8	1.67	4.97	1.7	2.28	292	5.8	43.6	48.19	132.65	136.4	1226	0	0	NA	0	0	0	0	1	0.35	0.11	2.75	8.99	1.82015	19.5836	176.023	115.2	158.4
313	A	2	51	2	2	2	1	2	2	150	50	22.22	115	68	78	65	4.548	6.94	1.07	4.68	2.88	1.56	313	6	15.4	6.73	12.01	30.23	283	0	0	NA	0	0	0	0	0	0.22	0.04	1.78	9.36	11.0026	4.34027	40.6317	81.864	124.92
314	B	2	51	2	2	2	1	3	1	152	45	19.48	124	68	66	74	5.4	6.6	1.52	4.54	2.41	1.34	231	5.9	33.8	6.88	28.09	29.81	253.4	0	0	NA	0	0	0	0	0	0.23	0.11	4.08	8.5	10.463	4.27997	36.3819	97.2	118.8
315	A	2	54	1	2	2	23	2	2	151	64	28.07	106	67	97	67	3.67	5.589	1.11	6.31	4.19	1.21	360	5.7	34.1	12.42	20.89	55.41	149.4	0	0	NA	0	0	0	0	0	0.22	0.14	1.68	2.7	12.4622	7.95549	21.4501	66.06	100.602
316	B	2	47	1	2	2	1	2	2	152	55	23.81	110	70	80	82	6	8.9	1.74	2.29	3.07	1.43	333	5.5	28.9	10.93	25.11	81.99	483.3	0	0	NA	0	0	0	0	1	0.13	0.05	2.3	5.89	3.80184	11.7717	69.3898	108	160.2
317	A	2	50	2	2	2	1	2	2	158	50	20.03	110	70	80	78	4.294	5.702	0.73	4.03	1.79	1.6	225	3.9	19.3	12.57	22.89	65.32	214.2	0	0	NA	0	0	0	0	0	0.19	0.11	1.82	3.28	8.74188	9.37832	30.7538	77.292	102.636
318	B	2	66	2	2	2	7	3	2	151	51	22.37	138	82	69	94	5	6.2	2.33	5.97	2.78	1.97	277	5.7	36.2	12.49	36.96	33.04	338.3	0	0	NA	0	0	0	0	0	0.38	0.11	2.96	10.24	9.33638	4.74372	48.5714	90	111.6
319	A	2	57	2	2	2	1	3	2	161	57	21.99	137	71	92	62	4.572	6.198	2.9	6.84	3.98	0.99	252	5.3	32.1	14.66	57.89	40.36	383.1	0	0	NA	0	0	0	0	0	0.36	0.15	3.95	9.49	8.43599	5.79469	55.0036	82.296	111.564
320	B	1	49	1	2	3	7	3	3	154	70	29.52	118	72	97	71	5	8.4	2.47	6.24	3.99	1.27	359	6	40.5	25.25	94.03	71.62	1478	0	0	NA	0	0	0	0	1	0.35	0.06	3.72	20.64	2.83799	10.2828	212.204	90	151.2
321	A	2	47	2	2	2	1	2	3	158	50	20.03	110	70	80	78	4.323	5.708	0.78	3.75	2.23	1.03	345	5.1	13.4	13.44	21.38	30.5	155	0	0	NA	0	0	0	0	0	0.44	0.14	1.59	5.08	15.624	4.37904	22.2541	77.814	102.744
322	B	2	48	1	1	2	1	2	2	158	51	20.43	132	72	95	70	5.6	6.4	1.98	6.06	3.14	1.96	339	5.1	36.2	14.71	20.1	56.31	211.3	0	0	NA	0	0	0	0	0	0.26	0.1	1.37	3.75	7.69042	8.08471	30.3374	100.8	115.2
323	A	1	53	2	2	2	1	2	2	165	55	20.2	108	68	70	68	5.232	6.703	1.14	6.32	4.28	1.13	385	5.8	33.2	18.64	66.85	72.99	547.3	0	0	NA	0	0	0	0	0	0.26	0.12	3.59	7.5	4.60261	10.4795	78.5786	94.176	120.654
324	B	2	20	2	2	2	1	3	1	158	59	23.63	117	75	82	75	6.5	6	1.78	3.95	2.14	1.1	323	5.1	46	12.65	21.67	184.1	237.4	0	0	NA	0	0	0	1	0	0.07	0.09	1.71	1.29	3.08206	26.4322	34.0847	117	108
325	A	2	42	2	2	2	1	2	3	160	53	20.7	112	72	73	70	4.247	6.845	1.34	5.63	3.27	1.56	260	5.5	19.8	16.07	57.64	47.25	227.3	0	0	NA	0	0	0	0	0	0.34	0.25	3.59	4.81	9.89967	6.78392	32.6346	76.446	123.21
326	B	1	45	2	2	2	7	3	2	171	80	27.36	124	72	94	80	5.1	3.4	1.94	3.88	1.59	1.43	357	5.4	60.5	12.43	25.28	35.35	61.84	0	0	NA	0	0	0	0	0	0.35	0.41	2.03	1.75	20.053	5.07538	8.87868	91.8	61.2
327	A	2	39	2	2	2	1	2	2	150	48	21.33	118	76	78	72	5.152	6.017	1.58	6.74	4.11	1.56	270	5.7	20.7	11.29	13.93	46.62	257.1	0	0	NA	0	0	0	0	0	0.24	0.05	1.23	5.51	8.57355	6.69347	36.9131	92.736	108.306
328	B	2	81	2	2	1	7	3	3	147	54	24.99	183	78	87	90	4	10.1	2.21	5.41	2.81	1.58	369	6.1	36.9	11.77	83.1	34.71	1568	0	0	NA	0	0	0	0	1	0.34	0.05	7.06	45.17	4.36902	4.98349	225.126	72	181.8
329	A	2	40	2	2	2	1	2	2	156	52	21.37	108	68	72	70	4.739	5.669	0.63	4.56	2.38	1.59	221	5.5	25.5	12.35	23.71	59.76	363	0	0	NA	0	0	0	0	0	0.21	0.07	1.92	6.07	6.93265	8.58004	52.1177	85.302	102.042
330	B	2	57	2	2	2	7	3	3	146	46	21.58	110	67	76	81	5.3	8.6	2.97	7.23	4.07	1.82	329	6	31.3	7.37	34.75	41.54	575.1	0	0	NA	0	0	0	0	1	0.18	0.06	4.72	13.84	5.63358	5.96411	82.57	95.4	154.8
331	A	2	50	2	2	1	7	3	3	151	65	28.51	150	85	86	75	5.879	9.655	0.8	6.39	4.31	1.32	379	6	40.2	17.46	61.03	55.55	294.6	0	0	NA	0	0	0	0	1	0.31	0.21	3.5	5.3	5.80652	7.97559	42.2972	105.822	173.79
332	B	2	57	2	2	1	6	3	1	149	49	22.07	126	78	78	101	6.3	5.7	1.78	5.28	2.09	2.03	265	5.4	52.5	54.21	65.95	306.6	307.6	0	0	NA	0	0	0	1	0	0.18	0.21	1.22	1	2.05105	44.0201	44.1637	113.4	102.6
333	A	2	64	2	2	1	7	2	2	162	59	22.48	170	75	82	72	4.398	6.392	1.14	4.36	2.26	1.46	279	5.8	36	17.3	50.31	83.99	791.8	0	0	NA	0	0	0	0	0	0.21	0.06	2.91	9.43	4.14216	12.0589	113.683	79.164	115.056
334	B	2	52	2	2	1	7	2	2	155	47	19.56	169	106	73	110	4.9	6.3	2.66	7.86	4.9	1.7	302	5.2	43.7	5.7	16.53	36.06	502.7	0	0	NA	0	0	0	0	0	0.16	0.03	2.9	13.94	7.49482	5.17732	72.1752	88.2	113.4
336	B	1	57	1	1	1	7	3	3	165	64	23.51	160	89	86	79	8.2	13.9	2.68	6.34	4.17	1.22	285	9.8	33	22.06	41.73	45.41	125.1	0	1	NA	0	1	1	0	0	0.49	0.33	1.89	2.75	6.53318	6.51974	17.9612	147.6	250.2
338	B	1	64	2	2	2	7	3	3	165	59	21.67	135	84	74	97	5.5	9.7	2.41	5.19	3.13	1.2	487	4.4	69	12.94	62.43	53.66	1219	1	0	NA	0	0	0	0	1	0.24	0.05	4.82	22.72	3.23887	7.70424	175.018	99	174.6
339	A	1	30	2	2	2	1	2	2	170	78	26.99	120	80	88	81	4.338	6.274	2.53	5.71	3.5	1.09	479	5.1	50.7	17.44	47.55	97.26	526.4	1	0	NA	0	0	0	0	0	0.18	0.09	2.73	5.41	4.63121	13.9641	75.5779	78.084	112.932
340	A	1	38	2	2	2	1	2	3	166	69	25.04	122	76	82	NA	4.741	5.437	0.51	5.42	3.33	1.39	375	5.5	33.8	11.21	17.22	28.55	115.1	0	0	NA	0	0	0	0	0	0.39	0.15	1.54	4.03	17.3963	4.09907	16.5255	85.338	97.866
341	A	1	54	1	2	2	1	2	2	158	66	26.44	136	87	94	80	6.105	13.56	2.21	6.05	3.78	1.35	331	6.5	38	12.3	29.64	47.67	617.9	0	1	NA	0	1	0	0	0	0.26	0.05	2.41	12.96	3.96524	6.84422	88.715	109.89	244.08
342	A	1	49	2	2	1	23	2	2	160	55	21.48	125	68	70	70	5.165	5.981	0.91	3.64	1.91	1.25	317	5.6	33.2	12.67	48.62	78.93	255.7	0	0	NA	0	0	0	0	0	0.16	0.19	3.84	3.24	6.27596	11.3324	36.7121	92.97	107.658
343	B	2	18	2	1	2	7	3	3	163	67	25.22	126	82	96	74	5.8	8.5	1.67	5.83	3.44	1.47	427	6.3	37.7	13.8	67.79	47.31	235	1	0	NA	0	0	0	0	1	0.29	0.29	4.91	4.97	7.35287	6.79253	33.7401	104.4	153
344	A	2	49	2	2	2	1	2	2	160	70	27.34	126	78	88	76	4.632	5.691	1.11	4.44	2.34	1.34	350	5.8	34.9	9.19	18.81	75.15	400.2	0	0	NA	0	0	0	0	0	0.12	0.05	2.05	5.33	5.92134	10.7897	57.4587	83.376	102.438
345	B	1	68	2	2	2	6	1	2	159	57	22.55	137	81	85	96	6.7	9.3	1.83	4.78	2.34	1.63	505	7.43	44.5	14.85	68.51	23.91	82.87	1	0	NA	0	1	1	0	1	0.62	0.83	4.61	3.47	14.7927	3.43288	11.8981	120.6	167.4
346	A	1	53	2	2	2	1	2	2	180	68	20.99	119	79	90	72	4.536	4.067	1.36	5.66	2.92	1.96	413	5.9	24.9	11.95	6.3	29.93	10.56	0	0	NA	0	0	0	0	0	0.4	0.6	0.53	0.35	35.5869	4.2972	1.51615	81.648	73.206
347	B	1	48	2	1	2	7	3	2	157	54	21.91	111	83	85	NA	19	26.3	3.05	4.81	2.44	1.18	309	9.5	40.4	31.85	84.76	40.43	70.22	0	1	NA	1	1	1	0	0	0.79	1.21	2.66	1.74	3.94389	5.80474	10.0818	342	473.4
348	A	1	41	1	2	2	1	2	2	160	76	29.69	97	60	98	76	4.582	8.314	2.04	6.25	4.1	0.82	444	5.3	28.4	25.14	72.82	110.9	801.6	1	0	NA	0	0	0	0	1	0.23	0.09	2.9	7.23	3.16476	15.9225	115.09	82.476	149.652
349	B	2	60	2	2	2	6	3	3	151	52	22.81	118	68	79	92	5.7	6.7	2.16	6.26	3.87	1.49	403	5.8	43.5	14.2	97.5	51.73	659.9	0	0	NA	0	0	0	0	0	0.27	0.15	6.87	12.76	4.79769	7.42714	94.7452	102.6	120.6
350	A	2	48	2	2	2	7	3	3	165	65	23.88	140	90	86	80	4.297	7.061	1.05	6.04	3.56	1.55	269	5.1	34	19	54.61	162.1	491.3	0	0	NA	0	0	0	0	0	0.12	0.11	2.87	3.03	3.4038	23.2735	70.5384	77.346	127.098
351	B	2	47	2	2	2	7	3	3	155	56	23.31	103	74	87	NA	4.6	9.1	2.55	4.46	2.35	1.17	427	5.1	37.2	13.1	102.5	50.33	1097	1	0	NA	0	0	0	0	1	0.26	0.09	7.82	21.8	4.05678	7.22613	157.502	82.8	163.8
352	A	2	32	2	2	2	1	2	2	158	52	20.83	90	60	90	70	4.493	5.715	0.78	2.57	0.82	1.2	267	5.2	16.5	11.79	26.01	52.51	348.8	0	0	NA	0	0	0	0	0	0.22	0.07	2.21	6.64	7.87189	7.53912	50.079	80.874	102.87
353	B	1	44	2	2	2	7	3	3	157	52	21.1	107	77	70	97	4.3	6.4	0.91	5.4	3.38	1.39	357	5.4	41.3	7.73	88.3	9.96	256.6	0	0	NA	0	0	0	0	0	0.78	0.34	11.42	25.76	22.1424	1.43001	36.8413	77.4	115.2
354	A	1	80	2	2	2	1	2	2	165	55	20.2	122	57	88	79	5.005	3.834	0.47	3.76	1.84	1.52	588	5.9	45.2	9.27	15.86	21.14	89.26	1	0	NA	0	0	0	0	0	0.44	0.18	1.71	4.22	24.0845	3.03518	12.8155	90.09	69.012
355	B	2	77	2	1	1	1	3	3	153	76	32.47	180	91	102	76	10	14.1	1.53	6.66	4.51	1.29	366	7.8	35.2	19.14	81.24	86.78	222.9	0	1	NA	1	1	1	0	0	0.22	0.36	4.24	2.57	3.04091	12.4594	32.0029	180	253.8
356	A	2	46	2	2	1	34	2	1	153	53	22.64	130	100	90	90	4.968	8.503	0.99	6.54	4.14	1.52	344	5.1	38.2	11.44	25.45	35.82	412.3	0	0	NA	0	0	0	0	1	0.32	0.06	2.22	11.51	7.46669	5.14286	59.196	89.424	153.054
357	B	2	62	2	2	2	1	3	3	157	45	18.26	136	91	78	80	5.6	6	0.48	4.87	2.48	1.8	325	5.5	48.8	12.8	66.15	30.16	111.7	0	0	NA	0	0	0	0	0	0.42	0.59	5.17	3.7	14.6795	4.33022	16.0373	100.8	108
358	A	2	59	2	2	3	7	3	3	146	55	25.8	130	80	70	78	6.501	7.19	1.7	6.51	3.74	1.84	325	6.9	40.5	13.8	23.41	34.38	145.4	0	0	NA	0	1	1	1	0	0.4	0.16	1.7	4.23	10.4339	4.93611	20.8758	117.018	129.42
359	B	1	67	2	2	2	1	2	2	167	58	20.8	128	82	93	77	5.1	7.4	1.26	3.97	1.67	1.65	378	5.2	52.5	11.85	63.76	51.57	386.2	0	0	NA	0	0	0	0	0	0.23	0.17	5.38	7.49	6.45085	7.40416	55.4487	91.8	133.2
360	A	2	28	2	2	3	7	3	3	163	51	19.2	118	72	70	70	4.999	7.185	0.93	4.09	2.16	1.5	315	5.3	35.9	14.96	50.64	62.66	652.9	0	0	NA	0	0	0	0	0	0.24	0.08	3.39	10.42	4.683	8.99641	93.7401	89.982	129.33
361	B	1	27	2	2	2	1	2	2	168	55	19.49	140	91	76	94	4.6	8.1	1.41	3.76	1.53	1.6	341	4.7	30.9	13.1	106.88	33.95	455.7	0	0	NA	0	0	0	0	1	0.39	0.23	8.16	13.42	7.85299	4.87437	65.4271	82.8	145.8
362	A	2	30	2	2	3	7	2	2	163	48	18.07	115	68	68	65	4.333	3.68	0.57	4.1	1.8	1.84	370	5.2	29.1	11.11	29.84	21.2	209.3	0	0	NA	0	0	0	0	0	0.52	0.14	2.69	9.87	18.7881	3.04379	30.0503	77.994	66.24
364	A	1	55	2	2	1	6	2	2	165	70	25.71	135	90	90	85	5.272	7.517	1.63	6.77	4.59	1.16	412	5.6	27.1	9.84	16.53	103.1	855.3	0	0	NA	0	0	0	0	0	0.1	0.02	1.68	8.3	2.99826	14.8026	122.8	94.896	135.306
365	A	2	68	2	2	2	1	2	2	159	42	16.61	116	70	65	68	4.502	5.137	0.56	6.72	3.62	2.17	291	5.4	39.2	7.77	4.35	22.29	179.7	0	0	NA	0	0	0	0	0	0.35	0.02	0.56	8.06	17.5081	3.20029	25.8004	81.036	92.466
366	B	2	61	2	2	1	7	3	3	158	61	24.44	120	85	86	87	4.8	6.8	2.15	5.66	3.6	1.19	455	5.6	57.7	12.22	66.57	41.87	270.2	1	0	NA	0	0	0	0	0	0.29	0.25	5.45	6.45	9.07301	6.01149	38.794	86.4	122.4
367	A	2	26	2	2	2	1	2	2	159	46	18.2	100	60	65	63	4.222	4.931	0.79	4.93	2.64	1.57	332	5.5	20.6	11.88	23.1	47.05	237.6	0	0	NA	0	0	0	0	0	0.25	0.1	1.94	5.05	10.7573	6.7552	34.1134	75.996	88.758
368	B	2	64	2	2	1	7	3	3	155	61	25.39	153	85	87	73	5.4	9.6	2.76	6.9	4.2	1.61	355	5.8	36.6	15.79	87.33	75.15	583.7	0	0	NA	0	0	0	0	1	0.21	0.15	5.53	7.77	3.86437	10.7897	83.8047	97.2	172.8
369	A	2	23	2	2	2	1	2	2	160	45	17.58	100	60	78	NA	4.233	4.794	0.52	3.6	1.53	1.63	227	5.3	25.5	10.24	30.96	52.11	684.1	0	0	NA	0	0	0	0	0	0.2	0.05	3.02	13.13	6.39177	7.48169	98.2197	76.194	86.292
370	A	2	53	2	2	2	1	2	2	146	39	18.3	93	61	70	73	4.522	5.851	0.66	4.42	2.14	1.7	212	5.5	30.5	7.22	16.46	35.54	635.1	0	0	NA	0	0	0	0	0	0.2	0.03	2.28	17.87	7.3191	5.10266	91.1845	81.396	105.318
371	B	2	36	2	2	2	1	2	2	155	43	17.9	113	78	72	83	4.6	5	3.85	5.03	2.39	1.35	329	5	29.3	10.07	40.22	23.14	189.3	0	0	NA	0	0	0	0	0	0.44	0.21	3.99	8.18	16.6098	3.32233	27.1788	82.8	90
372	A	2	54	2	2	2	1	2	2	159	60	23.73	117	56	85	69	4.531	7.504	1.39	5	2.61	1.72	367	5.4	42.6	12.97	26.69	62.49	285.2	0	0	NA	0	0	0	0	0	0.21	0.09	2.06	4.56	7.1098	8.972	40.9476	81.558	135.072
373	B	1	60	2	2	1	7	3	3	161	75	28.93	186	109	101	85	6	8.8	2.01	4.33	2.31	1.29	462	5.7	50.1	17.54	103.22	37.03	201.2	1	0	NA	0	0	0	0	1	0.47	0.51	5.88	5.43	8.74374	5.31658	28.8873	108	158.4
374	A	2	56	2	2	2	7	3	3	166	70	25.4	85	61	88	77	5.144	6.189	0.72	4.95	3	1.31	402	5.8	37.3	11.67	23.97	63.01	260.8	0	0	NA	0	0	0	0	0	0.19	0.09	2.05	4.14	7.09587	9.04666	37.4444	92.592	111.402
375	B	2	47	2	2	2	1	3	3	158	66	26.44	133	78	84	76	5.2	8.1	0.88	4.86	2.86	1.43	315	5.5	26.3	15.97	193.5	78.36	2672	0	0	NA	0	0	0	0	1	0.2	0.07	12.12	34.1	2.00451	11.2505	383.632	93.6	145.8
376	A	2	56	2	2	2	2	1	3	151	62	27.19	114	72	89	80	5.731	11.74	2.2	5.96	3.7	1.27	456	6.1	28.6	22.87	80.84	115.1	1805	1	1	NA	0	0	0	0	0	0.2	0.04	3.53	15.68	1.64515	16.5255	259.153	103.158	211.32
377	B	2	45	2	2	2	1	3	2	157	50	20.28	115	86	73	85	4.6	8.2	2.89	4.08	1.93	1.23	279	4.6	28.7	13.87	66.1	33.72	320.7	0	0	NA	0	0	0	0	1	0.41	0.21	4.77	9.51	9.22554	4.84135	46.0445	82.8	147.6
378	A	2	76	2	2	1	2	2	2	168	70	24.8	137	69	89	80	5.153	7.795	2.51	6.58	4.29	0.86	430	5.7	32.7	1.85	16.24	117.81	721.7	1	0	NA	0	0	0	0	0	0.02	0.02	8.78	6.13	3.01261	16.9146	103.618	92.754	140.31
379	B	1	39	2	2	2	7	3	3	163	78	29.36	130	80	87	76	4.9	4.8	8.82	5.32	0.89	0.93	508	5.4	30.8	15.97	85.17	62.62	223.6	1	0	NA	0	0	0	0	0	0.26	0.38	5.33	3.57	8.38471	8.99067	32.1034	88.2	86.4
380	A	2	74	2	2	1	23	2	2	150	50	22.22	133	52	69	68	6.031	11.44	2.52	7.08	4.37	1.14	457	5.7	32.6	9	67.17	61.74	1410	1	1	NA	0	0	0	0	0	0.15	0.05	7.46	22.84	2.50107	8.86432	202.441	108.558	205.92
381	A	1	77	2	2	1	7	3	3	161	70	27.01	121	62	95	61	5.12	9.632	2.02	5.03	3.24	0.82	488	6.2	39.6	44.22	149.79	107.6	941.7	1	0	NA	0	0	0	0	1	0.41	0.16	3.39	8.75	2.6501	15.4487	135.205	92.16	173.376
382	B	2	38	2	2	2	1	2	2	152	48	20.78	143	110	68	NA	4.9	6.9	0.98	5.16	2.89	1.5	269	5	36.9	13.05	94.26	50.66	548.1	0	0	NA	0	0	0	0	0	0.26	0.17	7.22	10.82	5.8436	7.27351	78.6935	88.2	124.2
383	A	2	72	1	1	1	3	2	2	147	47	21.75	150	78	96	79	7.013	14.15	6.28	5.62	2.26	0.8	471	6.8	26.7	13.65	64.25	70.69	423.9	1	1	NA	1	1	1	0	0	0.19	0.15	4.71	6	3.39732	10.1493	60.8615	126.234	254.7
384	B	1	59	2	2	2	1	3	1	163	70	26.35	142	98	93	67	5	5.4	1.09	5.73	3.26	1.73	535	4.8	45.1	13.37	37.33	29.48	32.68	1	0	NA	0	0	0	0	0	0.45	1.14	2.79	1.11	25.0702	4.23259	4.69203	90	97.2
385	A	2	58	2	2	2	6	2	1	151	63	27.63	138	78	83	98	5.733	12.8	2.78	7.22	3.78	1.67	367	5.5	23.9	5.05	32.29	50.62	256	0	1	NA	0	0	0	0	0	0.1	0.13	6.39	5.06	6.02634	7.26777	36.7552	103.194	230.4
386	A	2	50	1	2	3	7	3	3	159	65	25.71	100	66	86	72	4.844	6.944	1.2	5.74	3.57	1.25	311	5.9	22.1	6.5	48.15	73.91	456.3	0	0	NA	0	0	0	0	0	0.09	0.11	7.41	6.17	5.17346	10.6116	65.5133	87.192	124.992
387	B	1	30	2	2	2	7	3	3	155	53	22.06	121	73	74	83	4.4	6.4	3.17	6	2.91	1.86	377	4.7	44.3	12.25	117.43	59.77	584.1	0	0	NA	0	0	0	0	0	0.2	0.2	9.59	9.77	5.72268	8.58148	83.8622	79.2	115.2
388	A	2	45	2	2	2	1	2	2	151	48	21.05	92	66	71	73	4.067	4.591	0.79	4.36	1.91	1.91	222	5.4	41.5	3.79	22.84	25.3	70.38	0	0	NA	0	0	0	0	0	0.15	0.32	6.03	2.78	26.5071	3.63245	10.1048	73.206	82.638
389	B	2	36	2	2	2	2	3	3	146	47	22.05	122	67	67	NA	5	6.3	1.14	5.04	2.78	1.64	315	4.7	41.4	8.27	79.59	32.56	198.9	0	0	NA	0	0	0	0	0	0.25	0.4	9.62	6.11	11.8597	4.6748	28.5571	90	113.4
390	A	2	65	2	2	1	7	2	2	156	NA	NA	130	62	87	58	4.772	8.679	0.7	5.96	2.79	2.42	270	5.5	24.5	0.41	31.87	21.04	236.2	0	0	NA	0	0	0	0	1	0.02	0.13	77.73	11.23	13.1298	3.02082	33.9124	85.896	156.222
391	B	1	45	2	1	2	7	3	3	171	66	22.57	139	101	83	101	12.8	24.4	2.15	3.99	2.31	0.96	382	11.2	52.3	6.91	33.31	11.96	18.22	0	1	NA	0	1	1	0	0	0.58	1.83	4.82	1.52	18.6671	1.71716	2.61594	230.4	439.2
392	A	2	62	2	2	1	7	3	1	151	51	22.37	133	42	84	75	5.175	7.832	0.7	4.35	2.24	1.56	299	5.6	29.7	3.2	20.68	62.07	186.3	0	0	NA	0	0	0	0	1	0.05	0.11	6.46	3	7.59704	8.9117	26.748	93.15	140.976
393	B	1	40	2	2	3	7	3	3	167	61	21.87	125	78	83	76	4.6	6.7	1.24	6.17	4.07	1.43	443	5.1	44.1	29.78	239	48.8	658.4	1	0	NA	0	0	0	0	0	0.61	0.36	8.03	13.49	5.77803	7.00646	94.5298	82.8	120.6
394	A	1	58	2	2	1	7	3	3	165	61	22.41	140	90	89	NA	5.63	6.068	1.56	6.5	4.25	1.1	424	5.8	43	3.75	32.13	30.89	297.5	1	0	NA	0	0	0	0	0	0.12	0.11	8.57	9.63	9.46814	4.43503	42.7136	101.34	109.224
395	B	2	43	2	2	1	7	3	2	150	58	25.78	174	110	81	85	4.7	5.9	1.44	5.78	3.08	1.71	381	5	40.2	11.54	102.01	29.52	389.1	0	0	NA	0	0	0	0	0	0.39	0.26	8.84	13.18	9.86299	4.23833	55.865	84.6	106.2
396	A	2	54	2	2	2	7	3	3	165	55	20.2	95	56	85	72	4.25	5.761	0.83	5.36	1.87	1.75	425	5	34.7	1.16	18.37	29.19	338.9	1	0	NA	0	0	0	0	0	0.04	0.05	15.84	11.61	11.4459	4.19095	48.6576	76.5	103.698
397	B	1	33	2	2	2	7	2	2	167	58	20.8	119	94	77	104	4.4	5.6	1.67	5.55	3.14	1.69	412	5	38.4	15.64	100.49	53.41	351.2	0	0	NA	0	0	0	0	0	0.29	0.29	6.43	6.58	7.93638	7.66834	50.4235	79.2	100.8
398	A	2	60	2	2	1	2	2	2	152	105	45.45	118	67	79	76	6.05	5.89	1.26	6.31	3.12	2.22	392	6.4	31.1	6.12	27.02	89.58	564.7	0	0	NA	0	1	0	0	0	0.07	0.05	4.42	6.3	3.76107	12.8615	81.0768	108.9	106.02
399	B	1	42	2	2	1	7	3	3	163	64	24.09	164	143	86	98	5.4	8.8	3.58	7.37	NA	1.67	365	5.4	53.4	17.21	96.3	64.94	684.3	0	0	NA	0	0	0	0	1	0.27	0.14	5.6	10.54	4.00655	9.32376	98.2484	97.2	158.4
400	A	2	42	1	2	2	7	2	3	156	110	45.2	107	75	79	67	5.124	7.283	1.6	6.14	3.79	1.52	148	5.4	20.4	6.61	37.55	53.88	296.3	0	0	NA	0	0	0	0	0	0.12	0.13	5.68	5.5	7.06612	7.73582	42.5413	92.232	131.094
401	B	1	50	2	2	2	7	3	3	165	58	21.3	90	49	82	76	5.7	7	2.23	4.36	1.97	1.42	426	5.2	65.1	9.35	64.07	10.96	103	1	0	NA	0	0	0	0	0	0.85	0.62	6.85	9.4	25.737	1.57358	14.7882	102.6	126
402	A	2	47	2	2	2	7	2	2	155	45	18.73	133	45	85	85	5.685	7.507	1	5.76	2.84	2.11	289	5.5	34.8	8.9	42.92	89.95	357.4	0	0	NA	0	0	0	0	0	0.1	0.12	4.82	3.97	4.45486	12.9146	51.3137	102.33	135.126
403	B	1	47	2	2	2	7	3	3	164	45	16.73	112	85	85	89	4	4.6	2.55	6.49	3.47	1.86	529	5.2	38.6	14	109.26	34.26	190	1	0	NA	0	0	0	0	0	0.41	0.58	7.8	5.55	15.0532	4.91888	27.2793	72	82.8
404	A	2	26	2	2	2	7	2	2	165	54	19.83	92	60	60	60	4.363	5.066	0.67	5.75	3.14	1.85	185	4.6	19	1.48	22.42	79.07	536.8	0	0	NA	0	0	0	0	0	0.02	0.04	15.15	6.79	5.46768	11.3525	77.0711	78.534	91.188
405	B	2	48	2	2	1	7	3	2	155	52	21.64	145	100	74	85	5.3	7.8	0.55	4.24	1.82	1.79	323	5.2	34.7	9.22	81.81	47.64	80.18	0	0	NA	0	0	0	0	1	0.19	1.02	8.87	1.68	11.902	6.83991	11.5118	95.4	140.4
406	A	1	32	2	2	2	7	3	3	171	67	22.91	109	57	81	92	4.896	5.595	0.56	5.15	3.11	1.45	421	5.5	34.4	4.1	30.16	50.06	161.9	1	0	NA	0	0	0	0	0	0.08	0.19	7.36	3.23	10.4828	7.18737	23.2448	88.128	100.71
407	B	1	58	2	2	NA	7	3	3	170	64	22.15	113	88	92	81	4.7	4.6	2.09	6.1	3.36	1.6	362	5.1	45.9	10.19	63.81	31.63	197.4	0	0	NA	0	0	0	0	0	0.32	0.32	6.26	6.24	13.7528	4.54128	28.3417	84.6	82.8
408	A	1	59	2	2	2	7	3	3	167	57	20.44	78	55	75	58	4.427	5.97	0.47	5.59	3.62	1.35	312	5.4	50.8	0.22	0.22	12.84	104	0	0	NA	0	0	0	0	0	0.02	0	1	8.1	29.4504	1.8435	14.9318	79.686	107.46
409	B	2	28	2	2	2	7	3	3	151	65	28.51	109	74	78	84	4.9	6.5	1.12	4.7	3.05	1.15	455	3.9	21.1	14.48	109.75	49.63	660.1	1	0	NA	0	0	0	0	0	0.29	0.17	7.58	13.3	5.51708	7.12563	94.7739	88.2	117
410	A	2	59	2	2	2	7	2	3	163	53	19.95	84	58	75	74	4.785	7.55	0.77	5.82	3.75	1.29	224	5.4	47.7	0.22	17.99	56.23	396.5	0	0	NA	0	0	0	0	0	0	0.05	81.77	7.05	6.31342	8.07322	56.9275	86.13	135.9
411	B	2	46	2	2	2	2	3	3	153	79	33.75	114	70	93	78	5.4	7.1	1.78	5.8	3.46	1.43	412	5.1	31.1	16.22	152.5	89.88	762.6	0	0	NA	0	0	0	0	0	0.18	0.2	9.4	8.48	3.40293	12.9045	109.49	97.2	127.8
412	B	2	55	2	2	1	1	3	3	160	71	27.73	113	76	94	97	5.3	9.9	0.94	4.52	2.92	1.14	536	4.7	34.6	28.15	143.5	78.45	1023	1	0	NA	0	0	0	0	1	0.36	0.14	5.1	13.04	2.93319	11.2635	146.877	95.4	178.2
413	A	1	54	2	2	2	1	2	2	162	55	20.96	120	76	86	72	4.487	4.477	1.12	5.27	3.11	1.43	344	5.5	21.8	2.76	23.78	89.59	390.5	0	0	NA	0	0	0	0	0	0.03	0.06	8.62	4.36	5.88381	12.8629	56.066	80.766	80.586
414	B	2	46	2	2	2	1	2	2	143	50	24.45	126	82	76	84	5	5.3	1.51	8.09	4.87	1.96	472	5.2	42.2	12.86	84.69	47.33	438.5	1	0	NA	0	0	0	0	0	0.27	0.19	6.59	9.26	7.11156	6.79541	62.9576	90	95.4
415	A	2	75	2	2	2	1	2	2	158	45	18.03	110	80	63	78	4.716	5.547	1.44	6.34	3.68	1.59	257	5.7	42.8	0.36	9.51	24.18	127.8	0	0	NA	0	0	0	0	0	0.01	0.07	26.42	5.29	18.3499	3.47164	18.3489	84.888	99.846
416	B	1	45	2	2	2	7	2	2	167	61	21.87	133	98	85	NA	4.8	6.8	3.17	6.46	3.54	1.52	477	5.2	29.1	13.28	62.8	37.46	305	1	0	NA	0	0	0	0	0	0.35	0.21	4.73	8.14	9.15673	5.37832	43.7904	86.4	122.4
417	A	1	60	2	2	2	1	2	2	165	70	25.71	128	72	110	70	5.909	9.622	2.78	7.3	4.92	0.97	610	6.4	41	19.76	83.85	116.9	1135	1	0	NA	0	1	0	0	1	0.17	0.07	4.24	9.71	2.11169	16.7839	162.958	106.362	173.196
418	B	1	57	2	2	2	1	2	3	170	61	21.11	135	83	77	74	4.8	8.2	1.94	6.21	3.77	1.47	459	5.6	51.8	5.34	37.26	21.75	298.6	1	0	NA	0	0	0	0	1	0.25	0.12	6.98	13.73	11.7367	3.12276	42.8715	86.4	147.6
420	B	1	39	2	2	2	6	1	2	163	66	24.84	125	83	90	88	4.8	5.7	9	5.86	1.16	0.98	579	4.9	36.1	17.11	104.31	48.85	402.9	1	0	NA	0	0	0	0	0	0.35	0.26	6.1	8.25	7.33807	7.01364	57.8464	86.4	102.6
421	A	2	37	2	2	2	1	2	2	165	66	24.24	96	70	86	80	5.729	5.705	0.75	5.57	3.68	1.16	350	5.5	28.1	10.55	39.85	167.3	1088	0	0	NA	0	0	0	0	0	0.06	0.04	3.78	6.5	2.0865	24.0201	156.21	103.122	102.69
422	B	2	46	2	2	2	7	3	2	148	64	29.22	126	87	85	73	4.8	7.6	0.53	4.32	2.62	1.28	340	5	35.6	14.12	85.35	48.89	436.6	0	0	NA	0	0	0	0	0	0.29	0.2	6.04	8.93	6.51099	7.01938	62.6849	86.4	136.8
423	A	2	58	2	1	2	1	2	2	157	58	23.53	100	64	83	75	8.878	10.28	2.97	4.27	2.24	1	302	7.7	18.1	0.48	7	38.16	125.7	0	1	NA	0	1	1	0	0	0.01	0.06	14.58	3.29	7.50422	5.47882	18.0474	159.804	185.04
424	A	1	55	2	2	2	1	2	2	177	71	22.66	122	75	100	74	4.334	8.836	1.93	5.42	3.34	1.19	351	5.8	30.4	0.22	20.55	31.43	438.2	0	0	NA	0	0	0	0	1	0.01	0.05	93.41	13.94	8.43123	4.51256	62.9146	78.012	159.048
425	B	1	28	2	2	2	1	2	2	173	71	23.72	126	78	86	87	4.6	6.5	1.18	4.06	2.3	1.21	459	5	56.7	15.42	69.92	38.78	449.4	1	0	NA	0	0	0	0	0	0.4	0.16	4.53	11.59	7.87126	5.56784	64.5226	82.8	117
426	A	2	53	1	1	2	1	2	2	166	56	20.32	91	61	90	81	5.058	9.016	0.43	3.01	1.64	1.05	267	6.4	53.4	2	26.61	38.68	551.2	0	1	NA	1	1	0	0	0	0.05	0.05	13.31	14.25	6.07233	5.55348	79.1385	91.044	162.288
427	B	1	69	2	2	2	7	3	3	180	54	16.67	122	81	88	74	7	7.8	0.58	5.08	3.04	1.51	500	6.3	33.6	12.5	87.22	45.33	172.4	1	1	NA	0	0	0	0	0	0.28	0.51	6.98	3.8	7.65326	6.50826	24.7523	126	140.4
428	A	2	50	1	2	2	1	3	3	165	61	22.41	107	62	90	78	4.479	6.459	1.09	4.52	2.1	1.4	241	5.3	35.9	4.8	27.52	45.96	281.9	0	0	NA	0	0	0	0	0	0.1	0.1	5.73	6.13	9.0071	6.59871	40.4738	80.622	116.262
429	B	1	58	2	2	2	7	3	3	161	58	22.38	140	82	77	86	29.8	36.9	3.58	5.97	3.21	1.4	321	12.1	34	42.25	72.21	72.79	122.4	0	1	NA	0	1	1	0	0	0.58	0.59	1.71	1.68	1.45627	10.4508	17.5736	536.4	664.2
430	A	2	66	2	2	2	7	3	3	155	60	24.97	111	64	80	71	4.374	5.447	0.52	6.01	3.57	1.72	373	5.9	37.5	0.22	2.69	56.73	142.8	0	0	NA	0	0	0	0	0	0	0.02	12.23	2.52	11.0982	8.14501	20.5025	78.732	98.046
431	B	2	38	2	2	2	7	3	3	147	52	24.06	103	68	71	76	4.3	6.7	0.25	4.26	2.12	1.67	344	5.1	22.8	9.28	32.11	24.78	184.9	0	0	NA	0	0	0	0	0	0.37	0.17	3.46	7.46	15.6106	3.55779	26.547	77.4	120.6
432	A	1	68	2	2	1	2	2	2	158	53	21.23	78	44	90	40	4.161	7.623	0.95	4.33	2.65	1.03	384	4.5	46.2	1.94	27.64	44.89	470.1	0	0	NA	0	0	0	0	0	0.04	0.06	14.25	10.47	7.26874	6.44508	67.4946	74.898	137.214
433	B	1	40	2	2	2	7	3	3	162	52	19.81	120	78	69	74	4.4	5	1.5	5.31	2.83	1.58	426	4.9	68.2	6.46	30.47	15.96	202.5	1	0	NA	0	0	0	0	0	0.4	0.15	4.72	12.69	20.3791	2.29146	29.0739	79.2	90
434	A	2	46	2	2	2	1	2	2	163	60	22.58	116	67	85	76	6.266	4.074	1.84	4.55	2.42	1.06	316	5.8	30.2	2.27	17.18	69.86	177.4	0	0	NA	0	0	0	1	0	0.03	0.1	7.57	2.54	7.3153	10.0302	25.4702	112.788	73.332
435	B	1	46	2	2	2	7	3	3	167	79	28.33	138	83	97	75	5.4	7.3	1.85	5.03	3.13	1.22	454	5.3	32.2	23.98	72.71	90.36	1463	1	0	NA	0	0	0	0	0	0.27	0.05	3.03	16.19	2.49434	12.9734	210.05	97.2	131.4
436	A	1	50	2	1	2	1	2	2	166	62	22.5	119	69	75	79	15.23	26.76	2.25	5.67	3.6	0.99	288	12.5	37.5	12.44	19.1	18.83	60.86	0	1	NA	1	1	1	0	0	0.66	0.31	1.54	3.23	7.90003	2.70352	8.73798	274.14	481.68
437	B	2	41	NA	2	2	7	3	3	157	60	24.34	123	83	83	82	4.7	7.9	15.8	8.27	1.85	1.07	388	4.4	43.2	14.41	74.79	94.25	795.6	0	0	NA	0	0	0	0	1	0.15	0.09	5.19	8.44	3.47252	13.5319	114.228	84.6	142.2
438	A	1	52	2	2	2	1	2	2	163	53	19.95	107	62	76	92	4.237	5.348	1.13	6.68	4.39	1.25	328	5.5	49.5	0.22	10.13	34.69	208.9	0	0	NA	0	0	0	0	0	0.01	0.05	46.05	6.02	13.2106	4.98062	29.9928	76.266	96.264
439	B	1	55	2	2	NA	7	3	3	158	69	27.64	121	86	97	79	4.9	7.7	2.06	7.16	4.54	1.52	464	5.3	47.8	12.48	44.52	45.35	455.5	1	0	NA	0	0	0	0	0	0.28	0.1	3.57	10.04	6.53511	6.51113	65.3984	88.2	138.6
440	A	2	44	2	2	2	1	2	2	159	54	21.36	97	60	74	97	5.15	7.355	0.97	5.78	3.31	1.56	282	5.3	35.4	7.66	37.1	68.54	421.6	0	0	NA	0	0	0	0	0	0.11	0.09	4.84	6.15	5.2614	9.84063	60.5312	92.7	132.39
441	B	2	22	2	2	2	7	3	3	158	53	21.23	95	66	69	82	4.9	7.4	0.87	4.55	2.16	1.6	304	5	39.8	11.39	55.28	80.95	649.8	0	0	NA	0	0	0	0	0	0.14	0.09	4.85	8.03	4.0986	11.6224	93.295	88.2	133.2
442	A	1	52	2	2	2	1	2	2	167	65	23.31	90	72	90	76	5.055	6.798	3.44	3.77	1.91	0.65	385	5.5	47	0.22	18.88	70.07	544	0	0	NA	0	0	0	0	0	0	0.03	85.82	7.76	4.8198	10.0603	78.1048	90.99	122.364
443	B	2	47	2	2	2	7	2	2	156	45	18.49	110	66	69	63	4.8	4.5	0.47	4.39	2.22	1.6	266	4.3	41.3	9.9	43.88	55.86	489.2	0	0	NA	0	0	0	0	0	0.18	0.09	4.43	8.76	6.6381	8.0201	70.2369	86.4	81
444	A	1	58	2	2	2	1	2	2	177	71	22.66	159	66	94	87	5.593	6.988	2	6.19	3.94	1.02	340	4.8	38.9	8.99	50.13	122.3	570.1	0	0	NA	0	0	0	0	0	0.07	0.09	5.58	4.66	3.17035	17.5592	81.8521	100.674	125.784
445	B	1	51	2	2	2	7	3	2	169	74	25.91	125	85	87	74	13.7	25.2	1.2	6.38	4.15	1.55	500	10.6	51.2	29.57	13.08	55.11	89.16	1	1	NA	0	1	1	0	0	0.54	0.15	0.44	1.62	3.75959	7.91242	12.8011	246.6	453.6
446	A	2	25	2	2	2	1	2	2	152	48	20.78	99	54	65	85	4.606	5.103	1.47	3.52	1.71	1.31	282	5.1	25.5	0.22	15.67	88.55	361.9	0	0	NA	0	0	0	0	0	0	0.04	71.23	4.09	5.79444	12.7136	51.9598	82.908	91.854
447	B	2	41	1	2	2	7	3	2	150	56	24.89	99	65	85	85	4.7	4.8	0.57	5.21	2.48	1.97	224	4.4	41.3	12.68	49.72	63.57	286.4	0	0	NA	0	0	0	0	0	0.2	0.17	3.92	4.51	7.76473	9.12706	41.1199	84.6	86.4
448	A	2	34	2	2	2	1	2	1	163	60	22.58	110	80	85	60	4.888	3.926	0.58	4.66	2.48	1.57	255	5.2	31	5.78	24.74	73.25	138.2	0	0	NA	0	0	0	0	0	0.08	0.18	4.28	1.89	9.47368	10.5169	19.8421	87.984	70.668
449	B	2	31	2	2	2	1	2	2	158	57	22.83	88	60	78	66	5.4	7.3	1.42	4.09	2.2	1.31	290	5	29.8	11.53	21.18	26.27	302.5	0	0	NA	0	0	0	0	0	0.44	0.07	1.84	11.52	10.0555	3.77172	43.4314	97.2	131.4
450	A	2	35	1	2	2	1	2	2	158	69	27.64	120	75	80	NA	4.75	7.287	1.42	4.46	2.78	0.94	287	5.2	28.9	9.21	47.53	117.3	865.2	0	0	NA	0	0	0	0	0	0.08	0.05	5.16	7.38	3.01479	16.8413	124.221	85.5	131.166
451	B	2	39	2	2	2	7	3	3	152	56	24.24	123	82	78	81	4.3	6	1.99	5.46	2.43	1.99	289	4.7	52.7	11.04	83.32	64.55	597.6	0	0	NA	0	0	0	0	0	0.17	0.14	7.55	9.26	5.6247	9.26777	85.8004	77.4	108
452	A	2	32	2	2	2	1	2	2	169	53	18.56	92	63	70	76	4.615	5.228	0.57	5.2	2.72	1.81	260	4.8	22.3	0.22	20.27	34.47	245.3	0	0	NA	0	0	0	0	0	0.01	0.08	92.14	7.12	11.6925	4.94903	35.219	83.07	94.104
453	A	2	42	2	2	2	1	2	2	161	43	16.59	76	59	65	92	5.131	5.574	0.32	4.09	1.79	1.84	213	5.3	33.8	5.96	56.77	45.5	584.1	0	0	NA	0	0	0	0	0	0.13	0.1	9.53	12.84	6.16945	6.53266	83.8622	92.358	100.332
454	B	2	40	2	2	2	7	3	3	165	73	26.81	114	73	86	82	4.8	6.5	1.03	5.73	2.94	2.02	206	5.1	34.8	10.89	17.93	40.06	291.4	0	0	NA	0	0	0	0	0	0.27	0.06	1.65	7.27	9.11901	5.75162	41.8378	86.4	117
455	A	2	53	2	2	1	1	2	2	155	68	28.3	133	59	93	71	5.203	9.043	1.67	5.25	3.21	1.37	457	6.1	26.2	19.36	77.14	157.2	1096	1	0	NA	0	0	0	0	1	0.12	0.07	3.98	6.97	2.0252	22.57	157.358	93.654	162.774
456	A	2	57	2	2	2	7	3	3	150	50	22.22	100	69	73	80	4.909	11.79	2.11	6.68	4.16	1.4	327	5.8	32.1	21.4	117.95	84.13	1077	0	1	NA	0	0	0	0	0	0.25	0.11	5.51	12.8	2.73477	12.079	154.63	88.362	212.22
457	B	2	49	2	2	2	7	3	3	151	63	27.63	133	76	85	68	4.8	5.7	2.34	4.56	2.26	1.38	301	4.8	35.9	10.66	14.73	21.31	102.8	0	0	NA	0	0	0	0	0	0.5	0.14	1.38	4.82	21.1967	3.05958	14.7595	86.4	102.6
458	A	2	37	1	2	2	1	2	3	160	65	25.39	107	65	68	70	4.313	6.881	1.22	3.6	2.17	1.13	372	5.2	33.6	9.79	45.03	187.8	1875	0	0	NA	0	0	0	0	0	0.05	0.02	4.6	9.98	1.78945	26.9634	269.203	77.634	123.858
459	B	2	42	2	2	2	3	3	3	147	48	22.21	103	69	63	96	5.5	8.5	0.54	5.34	2.21	2.33	278	5	37.1	4.01	12.31	30.28	543.5	0	0	NA	0	0	0	0	1	0.13	0.02	3.07	17.95	6.69087	4.34745	78.033	99	153
460	A	1	47	1	2	1	56	2	2	172	69	23.32	120	75	72	80	4.015	5.796	1.91	5.65	3.53	1.12	477	5.6	36.3	21.71	80.43	75.6	280.1	1	0	NA	0	0	0	0	0	0.29	0.29	3.7	3.71	7.51928	10.8543	40.2154	72.27	104.328
461	A	2	62	2	2	2	2	2	2	161	65	25.08	116	62	68	67	5.062	6.384	2.84	5.44	2.88	1.14	309	5.1	19.7	23.89	76.7	149.4	650.1	0	0	NA	0	0	0	0	0	0.16	0.12	3.21	4.35	2.94175	21.4501	93.3381	91.116	114.912
462	B	2	44	2	1	2	7	3	3	153	48	20.5	126	78	73	101	4.8	7.3	0.71	3.29	1.69	1.16	411	2.7	61.8	11.49	48.07	31.08	385.2	0	0	NA	0	0	0	0	0	0.37	0.12	4.18	12.39	8.92754	4.46231	55.3051	86.4	131.4
464	A	2	35	2	2	2	1	2	2	153	55	23.5	86	57	77	63	4.5	7.252	1.04	6.6	4.48	1.21	312	5.7	26.1	5.09	41.27	51.85	428.1	0	0	NA	0	0	0	0	0	0.1	0.1	8.11	8.26	6.74597	7.44436	61.4645	81	130.536
465	A	2	35	2	2	2	1	2	2	155	55	22.89	104	68	87	74	4.201	8.589	1.16	6	3.11	2.03	313	5.7	18.7	6.55	66.37	63.23	1025	0	0	NA	0	0	0	0	1	0.1	0.06	10.13	16.21	4.02481	9.07825	147.164	75.618	154.602
466	A	1	69	2	2	2	7	3	3	173	43	14.37	96	63	63	69	4.04	7.213	0.66	4.25	2.29	1.39	326	4.1	40	3.6	51.34	19.75	150.8	0	0	NA	0	0	0	0	0	0.18	0.34	14.26	7.64	19.7763	2.83561	21.6511	72.72	129.834
468	B	2	62	2	2	NA	7	3	3	155	71	29.55	178	90	94	102	8.5	12	2.6	2.78	2.06	1.05	219	7.4	36.5	18.27	60.06	132.6	406.3	0	1	NA	0	1	1	0	0	0.14	0.15	3.29	3.06	2.19314	19.038	58.3345	153	216
469	A	1	63	2	2	2	1	2	2	159	64	25.32	140	76	88	72	4.792	6.867	0.77	5.66	3.47	1.42	264	5.8	27.3	6.78	31.21	38.2	360.9	0	0	NA	0	0	0	0	0	0.18	0.09	4.6	9.45	8.38527	5.48457	51.8162	86.256	123.606
470	B	2	76	2	2	1	7	3	3	155	60	24.97	129	76	84	73	5.2	6.6	0.93	4.5	2.26	1.51	316	5.2	40.5	11.57	77.54	43.81	729.3	0	0	NA	0	0	0	0	0	0.26	0.11	6.7	16.65	5.3682	6.29002	104.709	93.6	118.8
471	A	1	62	2	2	2	7	3	3	165	71	26.08	157	98	99	77	9.544	20.82	2.55	3.04	1.09	1	267	8.4	35.4	23.51	44.06	154.8	467.7	0	1	NA	0	1	1	0	0	0.15	0.09	1.87	3.02	1.46446	22.2254	67.15	171.792	374.76
472	B	2	63	2	2	2	2	3	3	158	73	29.24	92	66	93	99	4.7	10.1	4.07	5.88	2.99	1.18	502	5.2	38.9	15.98	92.98	96.89	1731	1	0	NA	0	0	0	0	1	0.16	0.05	5.82	17.87	2.20488	13.911	248.528	84.6	181.8
473	A	2	71	2	1	1	6	2	2	156	68	27.94	147	91	88	79	5.645	10.67	1.04	6.14	3.44	1.8	359	6.4	31.7	12.1	48.36	69.8	726.4	0	0	NA	0	1	0	0	1	0.17	0.07	4	10.41	3.42069	10.0215	104.293	101.61	192.06
475	B	2	65	2	2	1	7	3	3	155	66	27.47	148	96	98	101	5.3	8.6	1.95	5.41	3.39	1.18	283	5.6	27.3	15.38	39.75	52.5	385.6	0	0	NA	0	0	0	0	1	0.29	0.1	2.58	7.34	5.94521	7.53769	55.3625	95.4	154.8
476	A	2	32	2	2	2	1	2	2	161	59	22.76	106	65	77	70	4.654	6.215	0.56	4.39	2.05	1.78	286	5.4	17.3	1.3	32.28	23.64	296.1	0	0	NA	0	0	0	0	0	0.05	0.11	24.83	12.53	12.5155	3.39411	42.5126	83.772	111.87
477	A	1	66	2	2	1	6	2	2	164	71	26.4	137	91	92	85	6.873	13.62	3.15	4.43	2.48	1.04	440	7.2	38	21.8	54.95	95.75	501.8	1	1	NA	0	1	1	0	0	0.23	0.11	2.52	5.24	2.72613	13.7473	72.0459	123.714	245.16
478	A	1	51	1	2	2	6	3	3	165	75	27.55	136	98	95	77	5.901	11.18	3.15	5.38	3.28	0.83	383	5.8	33.4	39.11	128.67	147.8	759.1	0	1	NA	0	0	0	0	0	0.26	0.17	3.29	5.14	2.10544	21.2204	108.988	106.218	201.24
479	B	2	30	2	2	2	7	3	2	157	62	25.15	128	77	98	78	5.5	11.5	2.24	3.27	1.75	0.89	400	5.4	30.2	10.67	50.64	126.2	2123	0	1	NA	0	0	0	0	0	0.08	0.02	4.75	16.82	1.5022	18.1192	304.81	99	207
480	A	2	53	1	2	2	1	2	1	158	51	20.43	134	72	79	92	5.323	7.375	1.31	5.85	2.63	1.3	274	5.5	20.6	11.43	45.98	66.52	553.4	0	0	NA	0	0	0	0	0	0.17	0.08	4.02	8.32	4.63542	9.55061	79.4544	95.814	132.75
482	A	2	53	1	2	1	6	1	2	159	85	33.62	155	95	99	88	4.746	7.358	1.59	5.6	3.55	1.12	371	5.6	29.4	11.3	41.82	115.4	407.1	1	0	NA	0	0	0	0	0	0.1	0.1	3.7	3.53	4.15819	16.5686	58.4494	85.428	132.444
483	B	1	70	2	2	2	6	2	2	162	63	24.01	116	68	94	77	8.6	20.1	2.84	3.86	1.5	1.2	456	8.5	49.2	12.92	41.04	50.26	564.4	1	1	NA	0	1	1	0	0	0.26	0.07	3.18	11.23	2.80259	7.21608	81.0337	154.8	361.8
484	A	2	60	2	2	3	7	3	3	160	51	19.92	128	89	79	75	5.223	9.301	2.07	5.6	2.21	1.51	268	6.3	27.3	12.5	86.93	66.63	855.2	0	0	NA	0	0	0	0	1	0.19	0.1	6.95	12.84	3.58521	9.5664	122.785	94.014	167.418
485	B	2	62	2	2	1	2	3	3	167	85	30.48	152	95	97	84	5.8	8.3	2.31	5.59	3.21	1.4	464	5.4	43.1	15	85.67	115.7	790.8	1	0	NA	0	0	0	0	1	0.13	0.11	5.71	6.83	2.64244	16.6116	113.539	104.4	149.4
486	A	1	50	1	2	2	1	2	2	171	73	24.96	113	74	90	75	4.855	5.979	1.1	5.02	3.25	1.05	362	5.7	21.1	2.79	21.99	75.5	564.7	0	0	NA	0	0	0	0	0	0.04	0.04	7.88	7.48	4.85354	10.8399	81.0768	87.39	107.622
487	A	1	55	2	2	1	6	2	3	169	84	29.41	160	90	102	68	5.217	10.01	2.97	5.94	3.83	1.06	349	6.1	23.7	26.55	116.34	145.7	1048	0	0	NA	0	0	0	0	1	0.18	0.11	4.38	7.19	2.08201	20.9189	150.467	93.906	180.18
488	A	2	50	2	2	2	6	2	2	161	62	23.92	124	83	78	83	4.82	8.488	1.46	5.72	3.03	1.76	207	5.1	25	3.53	36.26	58.69	842.4	0	0	NA	0	0	0	0	1	0.06	0.04	10.27	14.35	4.20177	8.42642	120.948	86.76	152.784
489	B	1	47	2	2	2	7	3	3	164	70	26.03	112	80	95	80	5.1	8.3	5.54	6.69	2.32	1.54	434	5.4	33.8	17.86	90.72	65.89	1266	1	0	NA	0	0	0	0	1	0.27	0.07	5.08	19.21	3.16007	9.46016	181.766	91.8	149.4
490	A	2	62	1	2	3	6	3	3	164	54	20.08	111	69	77	78	5.213	6.495	0.75	5.81	3.22	1.78	318	5.5	39.9	7.34	28.37	37.58	280.6	0	0	NA	0	0	0	0	0	0.2	0.1	3.87	7.47	9.05896	5.39555	40.2872	93.834	116.91
491	B	1	62	2	2	3	7	3	3	168	64	22.68	140	89	81	NA	4.5	8.3	0.66	4.61	2.8	1.19	456	5	70	11.03	118.9	33.47	958.7	1	0	NA	0	0	0	0	1	0.33	0.12	10.78	28.64	5.5956	4.80546	137.645	81	149.4
492	A	2	51	2	2	2	6	2	2	166	66	23.95	136	81	86	76	4.997	7.365	0.94	4.67	2.27	1.34	278	5.9	27.8	4.84	44.99	73.36	547	0	0	NA	0	0	0	0	0	0.07	0.08	9.3	7.46	4.6156	10.5327	78.5355	89.946	132.57
493	B	2	64	1	2	2	7	3	3	148	48	21.91	115	79	64	97	4.8	7.3	0.65	5.64	2.78	2.08	338	5.7	43.8	11.16	70.68	18.16	336.2	0	0	NA	0	0	0	0	0	0.61	0.21	6.33	18.51	12.6586	2.60732	48.2699	86.4	131.4
494	A	2	47	2	2	2	1	2	2	156	50	20.55	106	74	67	104	4.951	10.38	1	4.22	2.41	1.35	205	5.4	35.2	2.61	45.51	49.53	1092	0	0	NA	0	0	0	0	1	0.05	0.04	17.44	22.05	3.73567	7.11127	156.784	89.118	186.84
495	B	2	73	2	2	1	7	3	3	151	46	20.17	176	106	71	128	6.7	5.2	0.87	6.9	2.53	2.21	338	4.9	37.5	18.59	68.05	67.61	170.1	0	0	NA	0	0	0	1	0	0.27	0.4	3.66	2.52	6.83657	9.70711	24.4221	120.6	93.6
496	A	2	25	2	2	2	1	2	2	160	45	17.58	120	70	60	82	4.493	3.748	0.65	4.33	2.32	1.45	301	5.3	25	2.42	28.23	50.53	195.4	0	0	NA	0	0	0	0	0	0.05	0.14	11.67	3.87	11.4088	7.25485	28.0546	80.874	67.464
497	A	1	49	2	2	2	1	2	3	165	60	22.04	110	70	86	72	4.918	4.853	0.75	6.11	3.87	1.5	393	5.2	31.4	0.22	9.03	50.53	79.34	0	0	NA	0	0	0	0	0	0	0.11	41.05	1.57	13.7812	7.25485	11.3912	88.524	87.354
498	A	1	53	1	2	2	1	2	2	173	76	25.39	129	86	92	81	5.837	12.29	4.28	5.98	3.72	0.91	439	6.4	27.3	27.61	103.34	74.5	796.5	1	1	NA	0	1	0	0	0	0.37	0.13	3.74	10.69	2.95348	10.6963	114.358	105.066	221.22
499	A	1	40	1	2	1	1	2	2	177	95	30.32	128	80	103	82	5.271	6.318	0.85	5.11	3.41	1.02	497	6.3	28.5	38.65	122.87	197.3	755.6	1	0	NA	0	0	0	0	0	0.2	0.16	3.18	3.83	2.28361	28.3274	108.485	94.878	113.724
500	B	1	58	2	2	2	7	3	3	158	59	23.63	130	86	89	76	5.2	7.6	1.34	4.76	2.42	1.56	299	5.3	67	10.44	61.56	25	257.4	0	0	NA	0	0	0	0	0	0.42	0.24	5.9	10.3	11.2894	3.58938	36.9562	93.6	136.8
501	A	2	52	2	2	2	1	3	1	155	54	22.48	155	91	75	79	4.807	7.809	2.31	5.75	3.25	1.25	237	5.9	21.7	5.85	53.26	61.54	525.3	0	0	NA	0	0	0	0	1	0.1	0.1	9.1	8.54	5.22928	8.83561	75.42	86.526	140.562
502	B	2	74	2	2	1	7	3	3	145	48	22.83	197	99	82	106	5.7	9.7	0.93	5.95	3.63	1.75	341	5.5	33.7	11.63	55.26	25.55	337	0	0	NA	0	0	0	0	1	0.46	0.16	4.75	13.19	8.58226	3.66834	48.3848	102.6	174.6
503	A	1	71	2	2	2	7	2	3	170	78	26.99	117	70	96	70	7.998	14.81	0.7	6.08	3.98	1.3	419	6.3	42	24.53	64.71	111.9	676.4	0	1	NA	0	0	0	0	0	0.22	0.1	2.64	6.04	1.92923	16.066	97.1141	143.964	266.58
504	A	2	50	1	2	1	1	2	2	159	59	23.34	135	79	84	75	6.729	12.23	1.33	5.3	3.2	1.23	429	6.3	26	20.31	85.02	114.3	1466	1	1	NA	0	0	0	0	0	0.18	0.06	4.19	12.83	1.61214	16.4106	210.481	121.122	220.14
505	A	2	34	2	2	2	7	3	3	157	56	22.72	106	62	75	92	5.386	7.023	0.94	4.81	3	1.19	317	5.5	31.4	10.32	87.04	60.13	710.8	0	0	NA	0	0	0	0	0	0.17	0.12	8.43	11.82	4.39667	8.63317	102.053	96.948	126.414
506	B	2	30	2	2	2	7	3	3	147	53	24.53	115	81	74	88	5.1	9.5	1.03	3.3	1.92	0.97	326	4.8	26.8	20.02	119.3	105.3	1282	0	0	NA	0	0	0	0	1	0.19	0.09	5.96	12.17	2.34648	15.1184	184.063	91.8	171
507	A	2	53	2	2	1	1	2	2	162	60	22.86	159	102	80	71	4.848	6.964	1.39	5.99	3.59	1.44	322	5.6	29	6.79	55.82	65.66	381.9	0	0	NA	0	0	0	0	0	0.1	0.15	8.22	5.82	5.96567	9.42714	54.8313	87.264	125.352
508	B	2	29	2	2	2	7	3	3	160	47	18.36	97	73	71	90	4.9	6.6	1.35	4.46	2.58	1.22	340	4.8	45	12.36	25.68	42.29	372.6	0	0	NA	0	0	0	0	0	0.29	0.07	2.08	8.81	7.78299	6.07179	53.4961	88.2	118.8
509	A	1	49	2	2	1	1	2	2	171	76	25.99	137	98	94	100	8.5	20.85	1.74	4.85	3.09	1.08	356	7.7	38.8	51.68	78.71	201.3	493	0	1	NA	0	1	1	0	0	0.26	0.16	1.52	2.45	1.3106	28.9017	70.7825	153	375.3
510	B	2	48	2	2	2	7	3	3	152	58	25.1	131	85	86	74	5.6	9.7	2	6.27	3.83	1.45	378	5.8	37.5	36.38	127.2	166.8	2783	0	0	NA	0	0	0	0	1	0.22	0.05	3.5	16.68	1.19191	23.9483	399.569	100.8	174.6
511	A	2	37	1	2	2	1	2	2	158	50	20.03	85	64	77	84	4.826	6.152	1.18	6.12	3.96	1.35	280	5.6	19.4	2.97	29	56.27	306.4	0	0	NA	0	0	0	0	0	0.05	0.09	9.76	5.45	7.44268	8.07897	43.9914	86.868	110.736
512	B	1	54	2	2	1	7	3	3	157	52	21.1	148	90	81	83	5.1	8.5	3.4	6.91	3.71	1.41	398	5.9	70	10.62	38.2	32.04	568.2	0	0	NA	0	0	0	0	1	0.33	0.07	3.6	17.73	6.70063	4.60014	81.5793	91.8	153
513	A	2	51	2	2	2	1	2	2	152	57	24.67	118	77	77	93	5.945	11.31	0.95	5.11	3.18	1.28	338	6.2	23.5	22.6	127.52	107	1006	0	1	NA	0	0	0	0	0	0.21	0.13	5.64	9.4	2.21414	15.3625	144.436	107.01	203.58
514	A	1	44	2	2	1	6	2	3	160	66	25.78	128	85	83	85	5.987	10.85	0.88	7.3	5.03	1.34	338	6.7	32.8	11.54	47.87	81.04	1346	0	0	NA	0	1	1	0	1	0.14	0.04	4.15	16.61	2.26659	11.6353	193.252	107.766	195.3
515	A	1	51	1	2	2	1	2	2	163	64	24.09	128	92	81	86	6.168	8.571	1.12	6.46	3.92	1.47	314	NA	17.3	15.32	89.27	67.56	672.7	0	0	NA	0	NA	NA	0	1	0.23	0.13	5.83	9.96	3.62941	9.69993	96.5829	111.024	154.278
516	A	1	45	2	2	2	6	1	1	174	76	25.1	127	89	89	78	5.19	5.817	1.9	4.48	2.76	0.82	497	5.9	37.8	12.51	31.7	90.31	510.1	1	0	NA	0	0	0	0	0	0.14	0.06	2.53	5.65	4.39712	12.9663	73.2376	93.42	104.706
517	B	2	40	2	2	2	7	3	3	159	55	21.76	129	69	75	86	4.7	11.3	0.82	4.1	2.24	1.41	358	5	31.2	14.3	89.38	31.93	587.9	0	1	NA	0	0	0	0	0	0.45	0.15	6.25	18.41	6.34357	4.58435	84.4078	84.6	203.4
518	A	2	39	2	2	2	2	1	2	155	54	22.48	107	71	74	83	4.631	7.14	1.72	4.89	2.89	1.21	454	5.6	21.8	0.3	14.1	88.03	499.6	1	0	NA	0	0	0	0	0	0	0.03	47	5.68	4.60858	12.6389	71.7301	83.358	128.52
519	B	2	64	2	2	2	7	3	3	154	50	21.08	107	85	88	83	5.8	12.8	2.78	7.26	4.2	1.72	380	6	41.8	16.32	66.92	25.83	330.4	0	1	NA	0	0	0	0	0	0.63	0.2	4.1	12.79	7.76749	3.70854	47.4372	104.4	230.4
520	A	2	39	1	2	2	1	2	2	162	61	23.24	118	73	78	76	4.575	10.03	0.74	4.69	2.48	1.62	290	5.4	30.1	3.54	19.32	50.85	201.8	0	0	NA	0	0	0	0	1	0.07	0.1	5.46	3.97	8.35271	7.30079	28.9734	82.35	180.54
521	B	1	64	2	2	3	7	3	3	151	46	20.17	90	60	73	89	4.6	6.4	1.29	4.93	3	1.28	305	3.7	51.9	7.26	37.29	16.36	289.1	0	0	NA	0	0	0	0	0	0.44	0.13	5.14	17.67	15.3899	2.34889	41.5075	82.8	115.2
522	A	1	32	1	2	2	3	2	2	174	83	27.41	124	67	91	82	5.094	9.754	3.73	5.41	3.03	0.82	390	6	18.5	29.45	85.27	94.37	910.7	0	0	NA	0	0	0	0	1	0.31	0.09	2.9	9.65	2.88935	13.5492	130.754	91.692	175.572
523	B	2	60	2	2	2	7	3	3	148	50	22.83	112	71	81	77	4.8	5.3	1.26	6.79	4.54	1.59	347	4.9	30.2	12.42	108.4	26.84	404.4	0	0	NA	0	0	0	0	0	0.46	0.27	8.73	15.07	10.3311	3.85355	58.0617	86.4	95.4
524	A	2	34	2	2	2	1	2	2	155	65	27.06	132	96	92	104	4.913	8.82	1.29	3.1	1.55	1.02	405	5.7	12.1	8.33	43.06	74.11	220.2	0	0	NA	0	0	0	0	1	0.11	0.2	5.17	2.97	6.37943	10.6403	31.6152	88.434	158.76
525	A	2	61	2	2	1	7	3	3	168	65	23.03	115	58	93	112	6.245	11.75	0.84	4.23	2.42	1.22	184	5.6	19.4	10.64	54.19	123.7	1199	0	1	NA	0	0	0	0	0	0.09	0.05	5.09	9.69	1.80477	17.7602	172.146	112.41	211.5
526	B	2	63	2	2	1	6	2	2	156	49	20.13	152	89	72	82	6.3	8.7	1.58	4.66	2.41	1.44	287	5.2	33.7	14.33	60.27	68.72	416.9	0	0	NA	0	0	0	0	1	0.21	0.14	4.21	6.07	4.35786	9.86648	59.8564	113.4	156.6
527	A	1	62	2	2	1	7	2	3	170	65	22.49	120	69	84	73	4.474	7.322	1.6	5.74	3.7	1	389	5.6	40.5	2.97	37.15	32.33	208.8	0	0	NA	0	0	0	0	0	0.09	0.18	12.51	6.46	12.0652	4.64178	29.9785	80.532	131.796
528	B	1	64	2	2	3	7	3	2	168	64	22.68	138	93	90	89	5.6	12.5	1.51	6.17	4.25	1.29	436	4.5	43.1	30.96	151.7	90.79	2011	1	1	NA	0	0	0	0	0	0.34	0.08	4.9	22.15	1.75967	13.0352	288.729	100.8	225
529	A	2	72	2	2	1	7	2	3	157	62	25.15	147	79	95	76	5.863	9.012	0.76	5.89	3.73	1.37	386	6.3	24.3	21.13	77.05	83.03	1470	0	0	NA	0	0	0	0	1	0.25	0.05	3.65	17.7	2.30772	11.921	211.055	105.534	162.216
530	B	1	35	2	2	3	7	3	3	173	69	23.05	125	90	84	75	5	7.1	1.28	7.12	4.61	1.6	440	5	53.7	13.28	103.7	44.93	773.2	1	0	NA	0	0	0	0	0	0.3	0.13	7.81	17.21	5.18945	6.45083	111.012	90	127.8
531	B	2	35	2	2	2	7	3	3	151	41	17.98	101	66	61	83	4.7	5.1	0.61	5.7	3.31	1.76	313	5.1	51.2	9.67	52.47	31.63	535.7	0	0	NA	0	0	0	0	0	0.31	0.1	5.43	16.94	8.51234	4.54128	76.9131	84.6	91.8
533	A	2	60	2	2	2	1	2	2	155	120	49.95	120	80	72	68	4.503	6.284	1.36	6	3.84	1.1	313	5.7	30.8	4.51	30.48	68.45	423.2	0	0	NA	0	0	0	0	0	0.07	0.07	6.76	6.18	6.05289	9.82771	60.7609	81.054	113.112
534	A	1	65	2	2	1	6	2	3	175	65	21.22	140	90	80	65	6.529	19.49	1.18	4.52	1.86	1.71	331	6.2	45.5	64.96	103.89	231.3	724.8	0	1	NA	0	0	0	0	0	0.28	0.14	1.6	3.13	1.26261	33.2089	104.063	117.522	350.82
535	A	1	48	1	2	2	7	2	2	159	62	24.52	109	65	88	68	4.507	4.709	1.32	3.72	2.15	0.95	346	5.4	25.8	4.4	34.76	74.45	303.7	0	0	NA	0	0	0	0	0	0.06	0.11	7.9	4.08	7.15648	10.6892	43.6037	81.126	84.762
536	A	1	36	2	2	2	1	2	2	160	57	22.27	88	44	86	74	4.329	7.121	1.16	4.53	2.78	1.06	370	5.6	32.4	3.05	50.19	41.57	495.1	0	0	NA	0	0	0	0	0	0.07	0.1	16.46	11.91	7.35933	5.96841	71.084	77.922	128.178
537	A	2	36	2	2	2	1	2	2	154	49	20.66	119	62	73	76	3.649	4.267	0.6	5.6	3.07	1.75	333	4.6	20.2	0.22	5.41	23.48	154	0	0	NA	0	0	0	0	0	0.01	0.04	24.59	6.56	22.3057	3.37114	22.1106	65.682	76.806
538	A	1	54	2	2	2	1	2	2	168	70	24.8	130	80	85	82	4.533	7.569	1.41	5.61	3.47	1.32	420	6.4	22.2	13.02	94.33	40.15	356.8	0	0	NA	0	1	0	0	0	0.32	0.26	7.25	8.89	8.2765	5.76454	51.2276	81.594	136.242
539	A	1	65	2	2	2	1	2	2	173	82	27.4	114	59	100	63	5.221	6.693	1.07	4.66	3.1	1	376	6	30.4	13.61	58.05	68.37	374.1	0	0	NA	0	0	0	0	0	0.2	0.16	4.27	5.47	5.64155	9.81622	53.7114	93.978	120.474
540	A	2	63	1	2	2	1	2	2	155	47	19.56	120	66	85	65	4.807	4.175	0.77	5.41	2.83	1.86	312	5.6	26.9	0.45	318.31	33.53	200.2	0	0	NA	0	0	0	0	0	0.01	1.59	707.36	5.97	13.304	4.81407	28.7437	86.526	75.15
541	A	2	26	2	2	2	1	2	2	160	54	21.09	100	68	76	76	5.015	6.812	1.32	5.88	3.47	1.46	266	5.2	18.6	0.3	14.92	177	510.9	0	0	NA	0	0	0	0	0	0	0.03	49.73	2.89	2.87976	25.4128	73.3525	90.27	122.616
542	A	2	46	2	2	2	1	2	2	158	59	23.63	111	65	78	56	5.221	6.937	4.62	4.91	2.12	0.94	426	6	23.7	8.99	33.67	86.12	778.3	1	0	NA	0	0	0	0	0	0.1	0.04	3.75	9.04	3.56005	12.3647	111.744	93.978	124.866
543	A	2	50	2	2	2	1	2	2	156	61	25.07	122	80	80	72	4.313	9.926	0.76	4.6	2.71	1.27	364	5.8	16.3	7.43	45.75	83.54	1106	0	0	NA	0	0	0	0	1	0.09	0.04	6.16	13.24	3.13265	11.9943	158.794	77.634	178.668
544	A	2	49	1	2	2	1	2	2	154	60	25.3	132	76	80	68	4.154	7.141	1.68	5	2.94	1.31	335	5.4	13	2.13	34.51	144.4	2150	0	0	NA	0	0	0	0	0	0.01	0.02	16.2	14.89	1.96284	20.7322	308.686	74.772	128.538
545	A	1	49	2	2	2	1	2	2	176	74	23.89	102	76	99	84	6.118	13.77	3.82	6.11	3.19	1.22	488	6.7	30.3	31.71	103.93	116.1	686.1	1	1	NA	0	1	1	0	0	0.27	0.15	3.28	5.91	2.2989	16.6691	98.5068	110.124	247.86
546	A	1	43	2	2	2	7	3	3	165	62	22.77	105	65	90	82	5.03	13.2	3.33	4.7	2.6	0.93	392	6	33.8	8.35	41.9	141.3	754.7	0	1	NA	0	0	0	0	0	0.06	0.06	5.02	5.34	2.27131	20.2872	108.356	90.54	237.6
547	A	2	60	2	2	2	1	2	2	153	58	24.78	102	53	89	54	4.516	8.256	1.45	6.34	4.16	1.18	307	5.5	16.6	5.07	40.42	50.44	371.9	0	0	NA	0	0	0	0	1	0.1	0.11	7.97	7.37	6.98158	7.24192	53.3955	81.288	148.608
548	A	2	44	2	2	2	1	2	2	154	48	20.24	121	71	69	58	4.02	5.323	0.58	4.94	2.66	1.65	273	5.2	20.2	0.51	18.07	33.85	261	0	0	NA	0	0	0	0	0	0.02	0.07	35.43	7.71	12.6399	4.86001	37.4731	72.36	95.814
549	A	2	54	2	2	1	4	2	2	148	63	28.76	174	82	90	65	4.694	7.581	1.11	5.67	3.79	0.98	336	5.3	16.7	8.35	41.94	46.85	490.2	0	0	NA	0	0	0	0	0	0.18	0.09	5.02	10.46	6.42738	6.72649	70.3805	84.492	136.458
550	A	2	45	2	2	2	1	2	2	156	46	18.9	90	60	68	81	4.114	7.98	4.11	4.22	2.07	1.6	379	5.3	13	0.22	18.09	24.9	273.8	0	0	NA	0	0	0	0	1	0.01	0.07	82.23	11	12.7217	3.57502	39.3108	74.052	143.64
551	A	2	50	2	2	2	1	2	2	149	47	21.17	87	59	76	54	3.801	5.882	1.09	6.19	3.55	1.6	271	5.4	19	0.29	17.73	36.5	219.6	0	0	NA	0	0	0	0	0	0.01	0.08	61.14	6.02	13.1939	5.24049	31.5291	68.418	105.876
552	A	1	48	2	2	3	7	3	3	170	77	26.64	166	77	103	76	4.596	10.43	3.56	6.57	3.88	1.16	363	5.7	37.4	3.51	41.72	72.41	691.9	0	0	NA	0	0	0	0	1	0.05	0.06	11.89	9.56	3.95852	10.3963	99.3396	82.728	187.74
553	B	2	52	2	2	2	2	3	3	150	61	27.11	150	83	80	86	4.9	7	1.09	5.58	3.15	1.8	276	5.5	43.5	3.13	21.45	50.38	170.9	0	0	NA	0	0	0	0	0	0.06	0.13	6.85	3.39	9.59858	7.23331	24.537	88.2	126
554	B	2	58	2	2	2	6	2	3	155	48	19.98	139	62	73	84	6.3	7.3	0.56	4.62	1.93	1.89	223	5.6	43.2	0.22	13.49	43.48	306.4	0	0	NA	0	0	0	1	0	0.01	0.04	61.32	7.05	6.77851	6.24264	43.9914	113.4	131.4
555	B	2	38	2	2	2	1	2	2	145	45	21.4	121	113	64	77	5.2	5.2	1.5	5.26	2.47	1.72	306	5.3	35.2	7.42	47.28	64.75	330.1	0	0	NA	0	0	0	0	0	0.11	0.14	6.37	5.1	6.58149	9.29648	47.3941	93.6	93.6
556	B	2	63	2	2	1	3	2	2	155	62	25.81	176	67	94	76	8	22	1.22	7.02	3.1	2.47	286	7.9	23.8	13.84	30.86	110.5	354.6	0	1	NA	0	1	1	0	0	0.13	0.09	2.23	3.21	2.20353	15.865	50.9117	144	396
558	B	2	62	2	2	2	1	2	2	155	60	24.97	135	65	88	82	5.9	5.6	1.35	4.6	2.59	1.42	321	5.7	18.2	16.41	18.43	107.9	114.9	0	0	NA	0	0	0	0	0	0.15	0.16	1.12	1.06	6.05948	15.4917	16.4968	106.2	100.8
559	B	2	46	2	2	2	1	2	2	150	45	20	100	60	78	NA	5.1	8.5	1.8	5.3	2.95	1.33	304	5	29.1	0.22	20.39	72.14	1169	0	0	NA	0	0	0	0	1	0	0.02	92.68	16.2	3.10546	10.3575	167.839	91.8	153
560	B	1	53	2	2	2	6	3	2	167	65	23.31	98	61	85	84	5.7	5.9	2.09	5.79	3.29	1.39	420	5.5	31.5	0.85	12.94	53.58	217.7	0	0	NA	0	0	0	0	0	0.02	0.06	15.22	4.06	7.89409	7.69275	31.2563	102.6	106.2
561	B	2	48	2	2	2	6	2	3	151	58	25.44	110	74	82	72	5.1	10.7	4.08	4.52	1.84	1.06	239	5.6	30.3	8.12	64.2	41.59	681.3	0	0	NA	0	0	0	0	1	0.2	0.09	7.91	16.38	4.97204	5.97128	97.8177	91.8	192.6
562	B	1	68	2	2	2	1	2	3	164	60	22.31	117	70	86	103	5	10	2.22	5.17	2.43	1.71	362	5.4	37.9	1.93	48.86	17.06	356.2	0	0	NA	0	0	0	0	1	0.11	0.14	25.32	20.88	11.1983	2.44939	51.1414	90	180
563	B	2	48	2	2	3	6	3	2	150	47	20.89	109	58	70	80	4.7	5	0.66	3.95	1.96	1.46	301	5.5	38.6	0.22	3.44	23.33	183.2	0	0	NA	0	0	0	0	0	0.01	0.02	15.64	7.85	16.5118	3.34961	26.3029	84.6	90
564	B	2	52	2	2	2	7	2	2	160	59	23.05	126	66	87	68	5.1	7.2	1.73	5.51	3.2	1.56	343	5.2	32.5	13.07	72.48	82.26	1140	0	0	NA	0	0	0	0	0	0.16	0.06	5.55	13.86	3.08152	11.8105	163.676	91.8	129.6
565	B	1	51	2	2	1	7	2	2	171	77	26.33	157	49	98	91	5	7.2	1.93	6.88	3.62	2.11	395	5.4	59.4	5.74	31.54	21.93	135	0	0	NA	0	0	0	0	0	0.26	0.23	5.49	6.16	16.8905	3.1486	19.3826	90	129.6
566	B	2	49	2	2	2	1	2	2	162	65	24.77	139	76	87	96	5.1	8.2	0.55	4.32	2.5	1.23	310	5.5	39.3	11.62	52.23	83.47	742.4	0	0	NA	0	0	0	0	1	0.14	0.07	4.49	8.89	3.57888	11.9842	106.59	91.8	147.6
567	B	2	64	2	2	2	1	3	3	150	57	25.33	126	68	93	80	6.4	13.9	2.05	6.65	3.99	1.58	320	6.3	31.9	24.8	95.34	81.88	559.5	0	1	NA	0	0	0	0	0	0.3	0.17	3.84	6.83	2.96274	11.7559	80.3302	115.2	250.2
569	B	1	56	2	2	3	7	2	2	172	79	26.7	140	80	93	85	6.6	9.6	2.28	5.8	3.54	1.17	271	6.2	45	35.91	217.67	39.54	1054	0	0	NA	0	0	0	0	1	0.91	0.21	6.06	26.66	3.59926	5.67696	151.328	118.8	172.8
570	B	2	52	2	2	2	7	2	3	154	57	24.03	137	82	85	79	5.3	9.4	1.14	6.17	3.53	1.72	437	5.6	45	6.98	26.4	61.68	501.9	1	0	NA	0	0	0	0	1	0.11	0.05	3.78	8.14	4.70254	8.85571	72.0603	95.4	169.2
573	B	1	31	2	2	2	7	3	3	170	77	26.64	120	80	94	75	4.5	7.9	2.35	5.89	3.4	1.38	412	5.5	43.4	0.22	24.39	125.6	1491	0	0	NA	0	0	0	0	1	0	0.02	110.86	11.87	2.29914	18.033	214.07	81	142.2
574	B	1	51	2	2	1	1	2	2	160	61	23.83	172	83	80	73	5.5	8.1	5.1	6.33	2.95	1.27	442	4.3	30.6	15.83	62.31	62.63	311	1	0	NA	0	0	0	0	1	0.25	0.2	3.94	4.97	5.84946	8.9921	44.6518	99	145.8
575	B	2	59	2	2	1	1	2	2	156	53	21.78	164	104	74	82	5.7	8.5	1.3	6.11	3.72	1.35	415	5.7	47	11.67	58.91	60.28	669.2	0	0	NA	0	0	0	0	1	0.19	0.09	5.05	11.1	4.10208	8.6547	96.0804	102.6	153
576	B	1	81	2	2	1	7	3	3	161	61	23.53	151	74	92	100	8.2	11	0.93	4.06	2	1.37	381	5.7	35.4	132.54	152.86	402.9	555.2	0	1	NA	0	0	0	0	0	0.33	0.28	1.15	1.38	0.992698	57.8464	79.7128	147.6	198
578	B	1	35	2	2	3	76	3	3	168	67	23.74	141	88	91	NA	6	10	3.76	4.39	1.87	1.26	518	5.9	42.3	14.79	85.54	96.44	1018	1	0	NA	0	0	0	0	1	0.15	0.08	5.78	10.56	2.40927	13.8464	146.159	108	180
579	B	1	51	2	2	2	7	3	3	168	54	19.13	100	70	77	85	4.6	6.3	1.23	5.77	3.34	1.63	481	5.4	46.6	5.31	61.31	38.72	377.6	1	0	NA	0	0	0	0	0	0.14	0.16	11.55	9.75	8.60806	5.55922	54.2139	82.8	113.4
581	B	2	49	2	2	2	7	3	2	156	63	25.89	128	77	78	99	5.3	8	0.85	4.48	2.06	1.62	306	5.2	29.1	3.45	32.37	47.46	531.2	0	0	NA	0	0	0	0	1	0.07	0.06	9.38	11.19	5.56211	6.81407	76.267	95.4	144
582	B	1	41	2	2	2	6	2	2	170	69	23.88	116	78	93	70	5.2	4	2.54	5.31	2.98	1.22	380	6	44	15.18	52.63	71.25	183.1	0	0	NA	0	0	0	0	0	0.21	0.29	3.47	2.57	8.31141	10.2297	26.2886	93.6	72
583	B	1	55	2	2	2	7	3	3	170	67	23.18	161	83	81	65	5.2	6.2	0.84	5.16	2.99	1.33	326	5.5	49.4	3.67	38.43	20.8	156.3	0	0	NA	0	0	0	0	0	0.18	0.25	10.47	7.51	16.5609	2.98636	22.4408	93.6	111.6
584	B	2	67	2	2	3	7	3	3	143	50	24.45	142	78	84	67	5	7.7	1.5	6.25	3.61	1.45	333	5.1	31.3	5.17	42.03	90.43	917.3	0	0	NA	0	0	0	0	0	0.06	0.05	8.13	10.14	3.21709	12.9835	131.701	90	138.6
585	B	1	60	2	2	1	1	1	1	166	69	25.04	144	85	97	67	5.3	4.9	2.26	5.39	3.06	1.15	654	5.7	57.9	19.38	57.48	147	416.6	1	0	NA	0	0	0	0	0	0.13	0.14	2.97	2.83	3.65676	21.1055	59.8134	95.4	88.2
589	B	1	63	2	2	2	6	3	3	167	76	27.25	112	68	98	80	5.2	6.7	0.99	4.57	2.77	1.15	419	5.2	33.8	0.22	16.05	87.03	461.4	0	0	NA	0	0	0	0	0	0	0.03	72.95	5.3	4.50307	12.4953	66.2455	93.6	120.6
590	B	1	47	2	2	2	6	2	2	167	61	21.87	99	71	78	93	3.8	4.5	0.96	5.5	3.56	1.17	423	5.4	39.5	10.16	65.31	26.54	322.5	1	0	NA	0	0	0	0	0	0.38	0.2	6.43	12.15	14.3173	3.81048	46.3029	68.4	81
591	B	1	60	2	2	2	7	3	2	169	61	21.36	125	64	82	62	5	6.5	0.95	4.62	2.35	1.59	636	5	45.9	2.59	48.09	26.93	340.3	1	0	NA	0	0	0	0	0	0.1	0.14	18.57	12.64	10.2626	3.86648	48.8586	90	117
592	B	2	37	2	2	2	1	3	2	148	49	22.37	110	67	72	82	5.2	5.4	1.01	3.73	1.69	1.38	264	5.5	34.5	14.98	79.78	45.52	412.1	0	0	NA	0	0	0	0	0	0.33	0.19	5.33	9.05	7.22221	6.53553	59.1673	93.6	97.2
593	B	1	55	1	2	2	7	2	2	168	82	29.05	119	81	102	NA	5	9	2.52	5.83	3.21	1.41	355	5.8	44.9	21.17	112.31	113.7	1131	0	0	NA	0	0	0	0	1	0.19	0.1	5.31	9.95	2.45876	16.3245	162.383	90	162
594	B	2	47	2	2	3	7	2	3	157	67	27.18	119	74	82	82	4.6	9.3	1.99	5.61	3.14	1.38	456	5	31.3	0.22	13.84	52.79	842.6	1	0	NA	0	0	0	0	1	0	0.02	62.91	15.96	4.45154	7.57933	120.976	82.8	167.4
595	B	1	41	1	1	2	7	3	2	170	82	28.37	110	63	94	76	5.9	10.6	1.35	4.89	2.82	1.04	341	6.3	42.9	16.48	91.3	54.56	532.8	0	0	NA	0	0	0	0	1	0.3	0.17	5.54	9.77	4.38148	7.83345	76.4968	106.2	190.8
596	B	2	38	2	2	2	7	3	2	156	59	24.24	94	49	76	82	4.5	5.4	0.6	3.48	1.48	1.5	348	5.3	26.8	1.55	21.86	38.67	344.5	0	0	NA	0	0	0	0	0	0.04	0.06	14.1	8.91	9.52515	5.55205	49.4616	81	97.2
597	B	2	52	2	2	1	7	3	3	160	61	23.83	160	100	86	108	14.1	27.7	1.09	8.36	1.23	1.07	202	12.5	26	11.09	15.09	38.34	88.06	0	1	NA	0	1	1	0	0	0.29	0.17	1.36	2.3	4.57911	5.50467	12.6432	253.8	498.6
598	B	2	50	2	2	2	7	3	2	151	54	23.68	119	78	79	NA	5.2	7.9	1.4	5.47	1.5	3	329	5.6	34.6	6.72	53.63	76.91	727.3	0	0	NA	0	0	0	0	1	0.09	0.07	7.98	9.46	3.77021	11.0424	104.422	93.6	142.2
600	B	2	51	2	2	3	7	3	2	160	65	25.39	134	120	86	40	4.9	10.1	1.96	5.26	1.2	2.9	327	5.8	29.4	16.02	67.97	88.88	682.3	0	0	NA	0	0	0	0	1	0.18	0.1	4.24	7.68	3.4479	12.7609	97.9612	88.2	181.8
601	B	2	82	2	2	2	7	3	3	156	57	23.42	140	70	83	55	4.9	7.3	2.1	5.77	3.3	1.43	425	5.8	33	0.22	0.93	32.48	428.5	1	0	NA	0	0	0	0	0	0.01	0	4.23	13.19	8.17997	4.66332	61.5219	88.2	131.4
602	B	1	48	2	2	2	7	2	2	168	68	24.09	125	83	96	70	4.7	7.2	0.75	3.94	1.81	1.31	330	5.2	39	12.8	89.98	33.34	474.6	0	0	NA	0	0	0	0	0	0.38	0.19	7.03	14.24	7.95183	4.78679	68.1407	84.6	129.6
603	B	1	55	2	2	2	1	2	2	165	66	24.24	104	69	81	70	5.3	7	1.45	5.02	3.23	1.14	385	5.9	30.8	1.87	25.52	34.09	307.7	0	0	NA	0	0	0	0	0	0.05	0.08	13.65	9.03	8.87963	4.89447	44.178	95.4	126
604	B	2	53	2	2	2	3	2	2	165	56	20.57	120	89	82	114	5.3	8.2	3.03	5.92	2.99	1.34	373	5.7	23.7	6.67	33.28	151.6	1295	0	0	NA	0	0	0	0	1	0.04	0.03	4.99	8.54	1.95366	21.766	185.93	95.4	147.6
605	B	1	53	2	2	1	1	2	1	173	80	26.73	155	98	90	78	4	9.2	2.32	3.95	1.9	1.25	461	5.8	22.9	12.49	76.09	62.68	552.5	1	0	NA	0	0	0	0	1	0.2	0.14	6.09	8.81	5.4237	8.99928	79.3252	72	165.6
606	B	2	52	2	1	2	7	2	2	157	58	23.53	124	77	80	90	6.5	6.7	0.98	5.58	3.1	1.4	235	6.9	29.6	12.26	16.5	66.55	66.05	0	1	NA	1	1	1	0	0	0.18	0.25	1.35	0.99	8.89384	9.55492	9.48313	117	120.6
607	B	1	58	2	2	2	7	3	1	171	58	19.84	107	77	79	85	4.8	5.9	1.07	6.43	2	2.89	318	5.7	27.6	1.83	21.81	37.38	183	0	0	NA	0	0	0	0	0	0.05	0.12	11.92	4.9	11.8976	5.36683	26.2742	86.4	106.2
608	B	2	66	2	2	2	1	2	2	147	53	24.53	144	79	79	89	5.4	8	1.53	5.18	2.95	1.38	422	5.5	36.9	8.75	68.5	55.77	391.8	1	0	NA	0	0	0	0	1	0.16	0.17	7.83	7.03	5.75836	8.00718	56.2527	97.2	144
609	B	1	41	2	2	3	7	3	3	169	62	21.71	106	74	79	72	5.1	7.5	1.93	5.99	3.94	1.25	375	4.5	33.2	5.7	60.01	66.62	602.7	0	0	NA	0	0	0	0	0	0.09	0.1	10.53	9.05	4.57182	9.56497	86.5327	91.8	135
610	B	1	58	2	2	2	7	1	2	173	84	28.07	111	56	99	83	5.4	6.93	1.98	5.12	3.07	1.2	371	6.1	28.6	13.41	97.69	48.59	550	1	0	NA	0	0	0	0	0	0.28	0.18	7.28	11.32	5.56112	6.97631	78.9663	97.2	124.74
611	B	2	42	2	2	2	1	3	3	150	54	24	114	67	78	73	4.6	5.2	0.78	3.93	1.18	2.07	335	5.2	29.9	1.51	18.25	46.85	231.4	0	0	NA	0	0	0	0	0	0.03	0.08	12.09	4.94	10.0952	6.72649	33.2233	82.8	93.6
612	B	2	52	2	2	3	7	3	2	150	59	26.22	126	87	84	83	5.1	5.6	1.46	6.93	4	1.43	331	5.6	24.3	6.61	41.82	61.26	238.5	0	0	NA	0	0	0	0	0	0.11	0.18	6.33	3.89	7.73083	8.79541	34.2426	91.8	100.8
613	B	2	75	2	2	2	7	3	3	159	49	19.38	121	75	75	NA	4.9	6	2.05	4.62	2.34	1.41	390	5.6	46.7	4.38	55.12	63.72	388.1	0	0	NA	0	0	0	0	0	0.07	0.14	12.58	6.09	6.24089	9.1486	55.7215	88.2	108
614	B	1	55	2	1	1	6	2	2	165	70	25.71	135	89	86	70	5.3	11.5	3.31	6.58	3.88	1.43	420	6.4	32.7	17.25	81.25	47.45	506	0	1	NA	0	1	0	0	0	0.36	0.16	4.71	10.66	5.06091	6.81263	72.649	95.4	207
617	B	1	55	2	2	1	1	2	2	163	67	25.22	118	76	85	77	6.9	5	1.37	4.89	2.25	1.64	350	5.5	28.7	31.13	44.09	384.4	177.8	0	0	NA	0	0	0	1	0	0.08	0.25	1.42	0.46	1.83715	55.1902	25.5276	124.2	90
618	B	1	54	2	2	2	7	3	2	176	63	20.34	111	77	75	75	5.5	2.8	1.94	6.82	3.74	1.9	425	5.9	38.5	1.26	11.75	44.99	45.61	1	0	NA	0	0	0	0	0	0.03	0.26	9.33	1.01	17.9406	6.45944	6.54846	99	50.4
619	B	2	46	1	2	2	7	3	1	158	56	22.43	126	76	83	70	5	7.5	2.2	5.63	3.31	1.46	327	5	30.6	0.22	13.69	89.42	549.2	0	0	NA	0	0	0	0	0	0	0.02	62.23	6.14	4.09638	12.8385	78.8514	90	135
626	B	2	55	2	2	2	7	3	2	168	68	24.09	140	84	93	79	5.2	7.4	1.18	5.45	2.8	1.69	281	5.1	28.5	8.06	43.57	69.19	313.9	0	0	NA	0	0	0	0	0	0.12	0.14	5.41	4.54	5.87245	9.93396	45.0682	93.6	133.2
627	B	2	40	NA	2	2	1	2	2	156	52	21.37	101	70	74	NA	4.9	5.9	1.11	6.2	3.19	2.1	305	5.7	28.5	2.19	36.02	28.66	208.5	0	0	NA	0	0	0	0	0	0.08	0.17	16.45	7.27	12.9036	4.11486	29.9354	88.2	106.2
628	B	2	62	2	2	2	7	3	2	160	47	18.36	138	82	72	106	5.2	7.8	1.4	5.92	3.08	1.96	349	5.7	35.1	0.22	15.8	35.52	326.8	0	0	NA	0	0	0	0	1	0.01	0.05	71.82	9.2	8.29703	5.09978	46.9203	93.6	140.4
629	B	2	53	1	2	3	7	3	3	150	43	19.11	120	80	71	65	5.55	6.3	1.22	4.52	2.65	1.35	350	5.3	25.6	12.68	72.62	315.4	267.6	0	0	NA	0	0	0	0	0	0.04	0.27	5.73	0.85	2.2254	45.2836	38.4207	99.9	113.4
631	B	2	48	2	2	2	1	2	2	168	71	25.16	128	86	88	91	5.3	8.4	1.54	4.55	2.41	1.35	293	5.3	46.6	2.8	22.96	80.22	575.8	0	0	NA	0	0	0	0	1	0.03	0.04	8.2	7.18	3.95895	11.5176	82.6705	95.4	151.2
632	B	2	69	2	2	2	2	3	1	142	44	21.82	131	53	80	68	5.4	6.1	1.67	4.74	2.5	1.47	297	6.4	32.5	1.19	22.38	20.37	154.1	0	0	NA	0	1	0	0	0	0.06	0.15	18.81	7.57	16.4732	2.92462	22.1249	97.2	109.8
633	B	2	33	2	2	2	1	2	2	156	52	21.37	107	63	73	80	5.3	5.4	1.01	5.15	2.93	1.61	284	5.5	30.5	1.59	15.82	42.5	152.3	0	0	NA	0	0	0	0	0	0.04	0.1	9.95	3.58	11.2943	6.10194	21.8665	95.4	97.2
634	B	1	53	2	2	2	6	2	2	165	68	24.98	137	70	89	69	5.4	7.3	2.01	7.13	4.23	1.62	455	5.3	36.7	11.46	45.46	47.14	227.7	1	0	NA	0	0	0	0	0	0.24	0.2	3.97	4.83	8.21004	6.76813	32.692	97.2	131.4
635	B	2	35	2	2	2	7	3	3	159	52	20.57	109	60	69	94	4.8	4.8	0.66	4.48	1.89	1.81	220	4.8	33.1	3.81	14.61	35.89	91.7	0	0	NA	0	0	0	0	0	0.11	0.16	3.83	2.56	16.8472	5.15291	13.1658	86.4	86.4
636	B	2	38	2	2	2	1	2	2	150	64	28.44	168	71	87	70	5.2	7.3	0.78	4.88	2.64	1.36	303	5.2	30.6	11.67	42.61	109.3	918.4	0	0	NA	0	0	0	0	0	0.11	0.05	3.65	8.4	2.86404	15.6927	131.859	93.6	131.4
637	B	1	60	2	2	1	7	3	3	167	70	25.1	168	68	91	78	4.7	7	0.81	6.16	3.64	1.81	307	5.5	39.4	6.21	41.37	33.77	357.8	0	0	NA	0	0	0	0	0	0.18	0.12	6.66	10.6	9.07542	4.84853	51.3711	84.6	126
638	B	2	53	2	2	2	7	3	3	150	60	26.67	116	70	85	74	5.6	10.3	3.17	7.58	4.21	1.69	356	6.1	32.4	9.71	29.09	224.2	2033	0	0	NA	0	0	0	0	1	0.04	0.01	3	9.07	1.15288	32.1895	291.888	100.8	185.4
639	B	2	47	2	2	2	6	2	2	158	53	21.23	114	75	70	67	5	4.7	0.95	5.87	3.28	1.72	217	5.1	41.9	2.88	27.65	49.36	364.2	0	0	NA	0	0	0	0	0	0.06	0.08	9.6	7.38	7.77769	7.08686	52.29	90	84.6
640	B	2	51	2	2	2	6	3	3	135	40	21.95	131	66	66	103	4.9	10.2	1.75	6.71	3.97	1.62	262	6	25.8	0.22	15.43	58.25	965.3	0	0	NA	0	0	0	0	1	0	0.02	70.14	16.57	3.68459	8.36324	138.593	88.2	183.6
641	B	2	65	2	2	2	7	3	3	150	53	23.56	139	79	82	81	5.2	6.3	1.04	5.68	3.16	1.68	321	5.8	49.8	3.33	23.48	42.88	300.7	0	0	NA	0	0	0	0	0	0.08	0.08	7.05	7.01	8.24492	6.1565	43.173	93.6	113.4
643	B	1	75	2	2	2	6	2	3	165	74	27.18	140	95	95	103	5.4	14.7	2.81	6.08	3.41	1.28	467	6.8	34.9	8.54	43.07	79.31	624.1	1	1	NA	0	1	1	0	0	0.11	0.07	5.04	7.87	3.14496	11.3869	89.6052	97.2	264.6
644	B	2	82	2	2	1	7	3	3	135	52	28.53	153	74	87	79	9.4	20.6	2.34	6.25	3.25	1.65	291	8.4	44	5.06	23.48	52.34	274.3	0	1	NA	0	1	1	0	0	0.1	0.09	4.64	5.24	3.52454	7.51472	39.3826	169.2	370.8
645	B	1	54	2	2	1	3	1	2	178	98	30.93	131	89	112	90	5.3	8.3	2.63	6.93	4.35	1.44	393	5.8	35.9	25.39	127.33	90.89	468.4	1	0	NA	0	0	0	0	1	0.28	0.27	5.01	5.15	4.04292	13.0495	67.2505	95.4	149.4
646	B	1	56	2	2	2	1	3	2	170	64	22.15	115	71	84	86	5	6.4	1.47	5.23	3.15	1.39	400	5.6	36.7	9.26	63	35	246.8	0	0	NA	0	0	0	0	0	0.26	0.26	6.8	7.05	10.3214	5.02513	35.4343	90	115.2
647	B	2	49	2	1	2	1	2	3	163	62	23.34	115	64	82	76	6.2	15.9	1.12	5.02	2.86	1.39	217	7.1	25.2	17.03	105.69	46.84	306	0	1	NA	1	1	1	0	0	0.36	0.35	6.21	6.53	5.14268	6.72505	43.934	111.6	286.2
649	B	1	60	2	2	3	7	3	3	175	77	25.14	157	88	93	74	5.5	5.7	1.35	6.29	3.33	1.56	311	6	44.7	4.1	42.2	66.52	351.2	0	0	NA	0	0	0	0	0	0.06	0.12	10.29	5.28	5.9152	9.55061	50.4235	99	102.6
650	B	1	60	2	2	2	6	2	2	163	73	27.48	134	91	98	84	11.7	11.1	1.67	8.73	5.12	1.66	368	6	41.7	11.32	34.02	252.7	295.5	0	1	NA	0	0	0	0	0	0.04	0.12	3.01	1.17	1.27305	36.2814	42.4264	210.6	199.8
651	B	2	60	2	2	3	7	3	3	153	53	22.64	120	70	85	70	5.4	9.5	4.8	6.57	2.96	1.28	337	5.8	29.2	14.33	40.59	67.09	533.2	0	0	NA	0	0	0	0	1	0.21	0.08	2.83	7.95	4.29912	9.63245	76.5542	97.2	171
652	B	1	24	2	2	3	7	3	2	165	57	20.94	154	86	79	97	5.4	7.1	1.22	4.54	2.4	1.27	333	5.8	50.5	12.15	76.41	52.04	493.3	0	0	NA	0	0	0	0	0	0.23	0.15	6.29	9.48	5.59145	7.47164	70.8256	97.2	127.8
653	B	1	66	2	2	2	1	3	2	168	63	22.32	122	69	86	88	4.6	6.5	1.2	4.43	2.13	1.39	388	5.2	35.2	3.52	39.35	25.35	223.9	0	0	NA	0	0	0	0	0	0.14	0.18	11.18	8.83	13.6248	3.63963	32.1464	82.8	117
654	B	2	57	2	2	3	3	3	3	147	67	31.01	146	81	96	72	6.4	9	1.37	4.89	2.82	1.21	425	5.9	15.6	12.42	40.15	111.2	918.3	1	0	NA	0	0	0	0	1	0.11	0.04	3.23	8.26	2.3039	15.9655	131.845	115.2	162
655	B	2	60	2	2	2	7	3	3	159	57	22.55	139	72	83	84	5.4	6.4	1.52	5.3	2.83	1.59	290	5.6	37.4	12.73	62.19	66.83	555.5	0	0	NA	0	0	0	0	0	0.19	0.11	4.89	8.31	4.75384	9.59512	79.7559	97.2	115.2
658	B	2	59	2	2	2	1	2	2	153	59	25.2	140	105	84	127	5.1	7.3	2.44	5.8	2.88	1.73	331	5.8	31	9.62	NA	109.8	557.6	0	0	NA	0	0	0	0	0	0.09	NA	NA	5.08	3.59491	15.7645	80.0574	91.8	131.4
660	B	2	47	NA	2	2	7	3	3	155	54	22.48	140	66	78	NA	6	9.9	1.1	5.72	3.42	1.52	377	5.7	40.5	3.4	26.22	108.9	1064	0	0	NA	0	0	0	0	1	0.03	0.02	7.71	9.77	2.21697	15.6353	152.764	108	178.2
661	B	2	68	2	2	2	6	2	2	144	45	21.7	114	64	76	NA	5.6	7.2	1.26	6.44	3.43	1.64	258	5.9	27.6	1	17.46	37.35	244.6	0	0	NA	0	0	0	0	0	0.03	0.07	17.46	6.55	8.90734	5.36253	35.1184	100.8	129.6
662	B	2	55	2	2	1	7	2	1	154	55	23.19	157	84	80	105	5.3	7.1	1.58	6.75	4.28	1.46	272	5.9	33.7	0.22	9.88	51.04	500.1	0	0	NA	0	0	0	0	0	0	0.02	44.91	9.8	5.69172	7.32807	71.8019	95.4	127.8
664	B	2	67	2	2	1	6	2	2	150	47	20.89	190	65	82	75	6	5.6	1.81	6.62	3.91	1.71	227	5.4	35.5	13.84	33.32	103.1	138.4	0	0	NA	0	0	0	0	0	0.13	0.24	2.41	1.34	5.87876	14.8026	19.8708	108	100.8
665	B	1	55	2	2	2	7	3	2	157	59	23.94	129	77	85	71	5.4	6.7	2.28	5.88	3.11	1.16	475	5.4	37.6	16.81	92.55	75.88	596.5	1	0	NA	0	0	0	0	0	0.22	0.16	5.51	7.86	4.23856	10.8945	85.6425	97.2	120.6
667	B	2	44	NA	2	2	7	2	2	166	66	23.95	108	67	84	78	6	8.9	0.62	5.91	3.17	1.85	259	6	27.7	0.89	21.89	75.86	571.8	0	0	NA	0	0	0	0	1	0.01	0.04	24.6	7.54	3.69258	10.8916	82.0962	108	160.2
669	B	2	37	2	2	2	7	3	2	158	55	22.03	133	78	81	119	5.7	9.2	1.31	6.66	3.75	1.85	138	5.5	27.7	1.55	28.81	58.77	781.4	0	0	NA	0	0	0	0	1	0.03	0.04	18.59	13.3	3.77908	8.4379	112.19	102.6	165.6
670	B	2	52	2	2	2	7	3	2	157	52	21.1	106	67	74	81	4.7	5.6	0.53	4.82	2.25	1.63	252	5.4	32.1	4.72	70.89	31.17	274.3	0	0	NA	0	0	0	0	0	0.15	0.26	15.02	8.8	11.3988	4.47523	39.3826	84.6	100.8
671	B	2	55	2	2	3	7	3	1	160	59	23.05	131	80	89	85	5.2	6.7	0.89	6.17	3.21	2.11	175	5.6	33.3	9.28	33.26	58.19	445.3	0	0	NA	0	0	0	0	0	0.16	0.07	3.58	7.65	5.74756	8.35463	63.934	93.6	120.6
672	B	2	62	2	2	3	7	3	3	155	54	22.48	132	86	84	105	6.8	9.7	1.04	4.48	2.42	1.32	320	6.3	35.6	17.94	51.74	137.4	1687	0	0	NA	0	0	0	0	1	0.13	0.03	2.88	12.28	1.45925	19.7272	242.211	122.4	174.6
673	B	2	48	2	2	2	1	3	3	156	61	25.07	128	76	85	72	5.3	5.6	1.16	5.04	2.99	1.31	338	5.4	35	6.58	47.95	71.28	462	0	0	NA	0	0	0	0	0	0.09	0.1	7.29	6.48	5.22235	10.234	66.3317	95.4	100.8
674	B	1	66	1	2	2	5	3	3	170	67	23.18	134	74	90	78	5.1	4.2	1.61	6.08	3.95	1.41	416	5.5	37.4	0.22	17.59	54.98	145.8	0	0	NA	0	0	0	0	0	0	0.12	79.95	2.65	10.6952	7.89375	20.9332	91.8	75.6
675	B	2	53	2	2	2	7	2	3	155	68	28.3	110	74	89	78	5.1	6.1	1.36	4.65	2.35	1.26	207	5.9	31.8	9.26	56.53	109.5	654.7	0	0	NA	0	0	0	0	0	0.08	0.09	6.1	5.98	3.53976	15.7215	93.9986	91.8	109.8
677	B	2	56	2	2	2	1	2	2	152	59	25.54	108	70	91	90	5.6	7.5	1.03	5.39	2.6	1.92	281	5.3	32.7	7.63	44.03	133.2	678.3	0	0	NA	0	0	0	0	0	0.06	0.06	5.77	5.09	2.74823	19.1242	97.3869	100.8	135
678	B	1	66	2	2	1	7	3	3	172	80	27.04	152	92	95	91	5.7	10.8	1.43	5.61	3.4	1.33	418	5.8	35.6	15.5	93.52	76.4	1113	0	0	NA	0	0	0	0	1	0.2	0.08	6.03	14.57	2.64721	10.9691	159.799	102.6	194.4
679	B	2	65	2	2	2	7	3	1	148	62	28.31	133	69	96	67	5.1	8.4	1.52	5.87	2.93	1.73	247	5.7	29.3	12.52	60.18	110.4	711.3	0	0	NA	0	0	0	0	1	0.11	0.08	4.81	6.44	3.0966	15.8507	102.125	91.8	151.2
680	B	2	50	2	2	2	7	3	3	165	53	19.47	121	75	74	108	4.8	11.2	0.57	5.11	2.51	1.67	292	5.9	31.7	0.34	33.49	22.32	228.4	0	1	NA	0	0	0	0	0	0.02	0.15	98.5	10.23	11.8047	3.20459	32.7925	86.4	201.6
681	B	2	62	2	2	2	1	3	2	160	50	19.53	114	62	83	67	5.6	10.8	4.05	5.48	2.57	1.35	274	6	22.8	6.14	56.51	60.91	467.1	0	0	NA	0	0	0	0	1	0.1	0.12	9.2	7.67	4.50295	8.74515	67.0639	100.8	194.4
683	B	1	53	2	2	2	7	3	2	166	79	28.67	123	70	102	76	5.3	3.6	2.55	6.08	3.55	1.45	509	5.7	46.5	0.22	0.92	43	37.18	1	0	NA	0	0	0	0	0	0.01	0.02	4.18	0.86	19.1902	6.17373	5.33812	95.4	64.8
684	B	2	55	2	2	2	1	3	3	153	58	24.78	194	86	85	82	5.8	8.3	1.33	5.1	2.65	1.27	206	5.7	19.7	9.76	52.5	81.55	610.5	0	0	NA	0	0	0	0	1	0.12	0.09	5.38	7.49	3.60225	11.7085	87.6525	104.4	149.4
685	B	2	50	2	2	2	1	3	2	159	60	23.73	111	62	84	70	4.9	5.7	0.55	4.94	2.52	1.52	355	5.7	31.9	9.6	47.09	56.78	471.1	0	0	NA	0	0	0	0	0	0.17	0.1	4.91	8.3	6.20244	8.15219	67.6382	88.2	102.6
686	B	2	52	2	2	2	1	2	2	149	60	27.03	137	81	83	97	4.9	8	1.55	6.32	3.77	1.57	358	6	38.1	15.41	72.97	95.2	1189	0	0	NA	0	0	0	0	1	0.16	0.06	4.74	12.49	2.78388	13.6683	170.711	88.2	144
687	B	2	54	2	2	2	7	3	3	155	56	23.31	137	79	81	94	5	7.8	1.31	4.89	2.11	1.59	244	5.1	29.6	0.22	4.31	65.3	705	0	0	NA	0	0	0	0	1	0	0.01	19.59	10.8	4.31322	9.37545	101.22	90	140.4
688	B	1	59	2	2	2	7	1	1	167	71	25.46	101	64	87	84	5.4	6.7	2.03	6.51	3.75	1.76	393	5.9	57.6	0.22	16.11	39.45	251	1	0	NA	0	0	0	0	0	0.01	0.06	73.23	6.36	8.94396	5.66403	36.0373	97.2	120.6
689	B	2	62	2	2	1	6	3	3	159	48	18.99	142	81	77	93	5.4	6.6	2.26	6	3.63	1.38	321	5.9	31.4	0.22	20.66	50.49	306.1	0	0	NA	0	0	0	0	0	0	0.07	93.91	6.06	7.1648	7.2491	43.9483	97.2	118.8
690	B	1	64	2	2	2	7	2	2	174	70	23.12	127	90	92	71	5.8	9.5	NA	NA	NA	NA	NA	5.3	69.5	11.58	47.39	144.3	1351	0	0	NA	0	0	0	0	1	0.08	0.04	4.09	9.36	1.76857	20.7179	193.97	104.4	171
691	B	2	53	2	2	2	1	2	2	158	59	23.63	106	71	87	106	5.4	6.3	7.93	8.43	2.28	1.62	405	6	45.4	25.4	53.56	79.58	215	0	0	NA	0	0	0	0	0	0.32	0.25	2.11	2.7	6.35895	11.4257	30.8686	97.2	113.4
693	B	2	63	1	1	3	7	2	2	159	60	23.73	150	93	75	93	6.1	7.1	0.95	6.93	4.13	1.31	489	6.4	39.5	12.32	77.92	149.5	659.1	1	1	NA	1	1	0	0	0	0.08	0.12	6.32	4.41	2.4805	21.4645	94.6303	109.8	127.8
694	B	2	52	2	2	3	7	3	3	150	50	22.22	168	78	79	105	5.9	8	1.31	5.02	2.47	1.45	348	5.1	40.1	8.23	56.7	79.63	362.8	0	0	NA	0	0	0	0	1	0.1	0.16	6.89	4.56	4.55286	11.4329	52.089	106.2	144
695	B	2	74	2	2	2	6	3	3	149	56	25.22	137	80	90	96	6.1	5.6	1.98	5.56	3.03	1.56	368	5.9	36.8	15.36	70	107.5	233.5	0	0	NA	0	0	0	1	0	0.14	0.3	4.56	2.17	4.78453	15.4343	33.5248	109.8	100.8
696	B	2	36	2	2	2	7	2	3	155	66	27.47	100	56	84	72	4.7	6.8	0.52	5.4	2.72	1.6	361	5.5	31.8	1.85	21.13	73.87	479.7	0	0	NA	0	0	0	0	0	0.03	0.04	11.42	6.49	5.20548	10.6059	68.8729	84.6	122.4
697	B	2	60	1	1	2	7	3	2	164	56	20.82	103	65	85	70	4.7	5.4	0.83	5.85	3.16	1.83	239	5.8	34.4	11.39	62.07	70.12	465.6	0	1	NA	1	0	0	0	0	0.16	0.13	5.45	6.64	5.79534	10.0675	66.8485	84.6	97.2
700	B	1	24	1	2	3	7	3	3	170	62	21.45	129	84	73	76	5.2	4.9	2.07	6.04	3.82	1.45	370	5.2	36.9	11.06	32.27	71.16	124.4	0	0	NA	0	0	0	0	0	0.16	0.26	2.92	1.75	9.05229	10.2168	17.8607	93.6	88.2
702	B	1	57	2	2	3	7	3	3	167	74	26.53	123	53	100	80	7.2	16.7	4.33	6.43	3.2	0.95	384	7.7	31.3	90.48	135.9	154.3	515.8	0	1	NA	0	1	1	0	0	0.59	0.26	1.5	3.34	1.83468	22.1536	74.056	129.6	300.6
703	B	1	53	1	2	2	7	3	1	165	73	26.81	137	86	94	90	5.3	4.1	NA	7.06	1.19	0.77	379	5.9	50.7	13.81	26.83	54.18	136.2	0	0	NA	0	0	0	0	0	0.25	0.2	1.94	2.51	10.7956	7.77889	19.5549	95.4	73.8
704	B	2	47	2	2	2	7	3	1	149	49	22.07	109	60	71	102	5	5.8	0.56	4.63	2.06	1.8	238	4.3	42.4	7.1	20.28	63.95	97.34	0	0	NA	0	0	0	0	0	0.11	0.21	2.86	1.52	10.3695	9.18162	13.9756	90	104.4
705	B	2	76	2	2	2	1	3	2	140	47	23.98	135	64	86	100	5.1	7.3	1.16	6.8	3.93	1.29	378	6.4	54.1	4.08	44.24	46.54	391.2	0	0	NA	0	1	0	0	0	0.09	0.11	10.84	8.41	6.81807	6.68198	56.1665	91.8	131.4
706	B	2	54	2	2	2	7	3	2	153	44	18.8	86	56	72	100	4.8	6.7	1.32	4.74	2.21	1.73	158	6	30.4	0.22	16.13	36.3	393.9	0	0	NA	0	0	0	0	0	0.01	0.04	73.32	10.85	8.33529	5.21177	56.5542	86.4	120.6
708	B	2	55	2	2	2	7	3	3	152	57	24.67	97	69	81	88	6.1	8.3	3.08	5.72	3.27	1.19	393	5.7	47.2	12.13	55.67	36.94	390.9	0	0	NA	0	0	0	0	1	0.33	0.14	4.59	10.58	6.56815	5.30366	56.1235	109.8	149.4
709	B	2	50	2	2	2	1	3	2	159	54	21.36	116	82	81	83	5.5	5.5	1.05	6.06	3.04	1.7	295	5.9	40.3	9	37.37	84.31	517.2	0	0	NA	0	0	0	0	0	0.11	0.07	4.15	6.13	4.41814	12.1048	74.257	99	99
710	B	2	81	2	2	NA	7	3	3	157	43	17.44	145	50	66	78	5	5.3	0.95	5.74	3.4	1.51	506	5.2	56.1	1.26	30.82	21.7	212.6	1	0	NA	0	0	0	0	0	0.06	0.14	24.46	9.8	15.1237	3.11558	30.524	90	95.4
711	B	1	65	2	1	2	7	3	3	169	61	21.36	136	74	85	109	5.7	9	2.19	5.23	2.82	1.27	514	5.3	54.5	6.21	27.69	87.53	526.9	1	1	NA	1	0	0	0	0	0.07	0.05	4.46	6.02	3.64559	12.5671	75.6497	102.6	162
712	B	2	62	2	1	2	7	3	3	160	60	23.44	124	87	86	77	6	8.5	1.1	5.12	2.5	1.58	250	5.9	24.8	21.46	72.14	73.95	283.3	0	1	NA	1	0	0	0	0	0.29	0.25	3.36	3.83	5.10462	10.6174	40.6748	108	153
713	B	2	59	1	2	2	1	2	2	160	57	22.27	149	86	83	105	7.5	12.1	0.73	5.89	2.94	1.79	288	6.5	36.2	4.78	21.9	81	352.2	0	1	NA	0	1	0	0	0	0.06	0.06	4.58	4.35	3.40748	11.6296	50.5671	135	217.8
714	B	1	71	1	2	2	7	3	3	174	72	23.78	122	81	100	68	5.2	7.8	0.72	3.66	1.58	1.35	458	5.7	43.6	0.22	18.46	62.22	475.2	1	0	NA	0	0	0	0	1	0	0.04	83.91	7.64	5.14735	8.93324	68.2268	93.6	140.4
715	B	2	39	1	2	2	7	3	1	146	58	27.21	102	72	82	87	5.2	7.6	2.16	6.81	4.07	1.49	293	5.7	28.5	14.65	83.97	52.34	191.9	0	0	NA	0	0	0	0	0	0.28	0.44	5.73	3.67	8.38971	7.51472	27.552	93.6	136.8
716	B	2	46	1	2	2	6	2	2	159	56	22.15	105	70	82	84	4.8	5.9	0.7	4.61	2.02	1.57	275	5.5	35.1	4.88	25.3	68.39	372.9	0	0	NA	0	0	0	0	0	0.07	0.07	5.18	5.45	6.21595	9.8191	53.5391	86.4	106.2
718	B	2	52	2	2	1	7	3	1	151	52	22.81	154	80	82	80	5.7	8.7	1.26	4.95	2.68	1.57	274	5.8	36.1	5.73	51.27	31.62	834	0	0	NA	0	0	0	0	1	0.18	0.06	8.95	26.38	5.16316	4.53984	119.742	102.6	156.6
719	B	1	52	2	2	2	2	2	2	167	73	26.18	145	84	92	92	5.5	4.5	1.93	9.37	6.05	1.5	363	5.4	53.6	7.7	23	70.25	207.3	0	0	NA	0	0	0	0	0	0.11	0.11	2.99	2.95	7.47315	10.0861	29.7631	99	81
721	B	2	60	2	1	1	7	3	3	136	41	22.17	153	79	72	83	9.2	8.8	0.56	5.32	3.19	1.49	229	11.7	28.2	16.45	17.31	36.3	35.66	0	1	NA	1	1	1	0	0	0.45	0.49	1.05	0.98	11.7666	5.21177	5.11989	165.6	158.4
722	B	2	53	2	2	3	7	3	1	150	56	24.89	142	78	77	97	5.4	11.1	1.01	5.44	2.8	1.62	305	6.5	48	6.54	46.08	53.89	544.3	0	1	NA	0	1	0	0	0	0.12	0.08	7.05	10.1	4.56632	7.73726	78.1479	97.2	199.8
723	B	1	53	2	2	2	7	3	3	169	72	25.21	120	76	97	73	5.5	6.1	2.31	6.11	3.35	1.24	430	6	45	21.97	59.81	165.4	1063	1	0	NA	0	0	0	0	0	0.13	0.06	2.72	6.43	2.14947	23.7473	152.62	99	109.8
724	B	2	51	2	1	3	7	3	2	152	59	25.54	128	78	87	106	17	30.1	2.1	6.39	3.14	1.88	298	12.3	43.9	53.46	66.81	150.6	217.3	0	1	NA	1	1	1	0	0	0.35	0.31	1.25	1.44	1.16189	21.6224	31.1989	306	541.8
725	B	2	56	2	2	2	7	3	3	156	56	23.01	109	70	76	85	5.3	4.8	2.1	2.43	3.94	1.86	282	5.3	42.4	0.22	12.85	43.04	203.3	0	0	NA	0	0	0	0	0	0.01	0.06	58.41	4.72	10.2725	6.17947	29.1888	95.4	86.4
726	B	2	34	1	2	2	7	3	1	150	52	23.11	109	63	75	84	4.3	5.1	0.41	4.12	1.73	1.6	301	5.3	27.4	0.22	0.22	37.77	227	0	0	NA	0	0	0	0	0	0.01	0	1	6.01	12.1723	5.42283	32.5915	77.4	91.8
727	B	2	56	2	2	2	1	2	1	148	53	24.2	151	78	77	103	6.2	6.1	0.94	7.99	4.09	2.04	274	5.19	57.9	11.65	56.91	60.79	220.5	0	0	NA	0	0	0	1	0	0.19	0.26	4.88	3.63	6.77699	8.72793	31.6583	111.6	109.8
728	B	2	55	2	2	2	7	3	3	160	70	27.34	133	76	92	71	5.7	7.6	1.01	5.38	3.07	1.63	361	5.9	42.4	0.22	13.31	65.03	210.9	0	0	NA	0	0	0	0	0	0	0.06	60.5	3.24	6.63528	9.33668	30.28	102.6	136.8
729	B	2	55	2	2	1	7	2	3	150	56	24.89	161	78	86	97	5	9.2	1.96	5.49	1.4	2.94	328	5.4	39.9	5.77	48.4	74.25	952.8	0	0	NA	0	0	0	0	1	0.08	0.05	8.39	12.83	3.32587	10.6604	136.798	90	165.6
730	B	2	25	2	2	2	1	2	2	158	47	18.83	121	75	70	102	4.7	4.4	1.19	5.24	2.75	1.79	242	5.4	21.7	11.21	29.51	105.7	188.1	0	0	NA	0	0	0	0	0	0.11	0.16	2.63	1.78	6.71499	15.1759	27.0065	84.6	79.2
731	B	2	40	1	2	2	5	3	1	163	48	18.07	115	78	71	118	5.2	7.4	0.59	5.25	2.72	2.01	242	5.7	34.8	6.38	40.09	36.78	392.3	0	0	NA	0	0	0	0	0	0.17	0.1	6.28	10.67	7.61056	5.28069	56.3245	93.6	133.2
732	B	2	53	2	2	2	7	3	2	160	52	20.31	93	62	79	85	4.8	4.5	1.44	5.45	2.85	1.57	289	5.6	43.3	3.91	16.58	55.86	94.76	0	0	NA	0	0	0	0	0	0.07	0.17	4.24	1.7	12.6277	8.0201	13.6052	86.4	81
733	B	2	49	2	2	3	7	3	3	155	50	20.81	120	70	79	93	5	9.4	0.95	5.18	2.5	1.64	268	5.4	38.5	0.93	18.39	41.83	530.4	0	0	NA	0	0	0	0	1	0.02	0.03	19.77	12.68	5.89499	6.00574	76.1522	90	169.2
734	B	2	58	2	2	2	7	3	3	153	53	22.64	109	74	77	101	5.3	6.4	1.03	6.47	3.43	2	302	5.5	29.9	4.35	51.94	28.05	325.3	0	0	NA	0	0	0	0	0	0.16	0.16	11.94	11.6	9.8714	4.02728	46.705	95.4	115.2
735	B	1	54	2	2	3	7	3	3	164	49	18.22	114	80	74	78	5	11	1.86	4.19	1.74	1.51	424	5.5	69.2	1.76	32.04	22.87	198.4	1	0	NA	0	0	0	0	1	0.08	0.16	18.2	8.68	12.163	3.28356	28.4853	90	198
736	B	1	59	2	2	2	7	2	2	162	69	26.29	112	82	93	86	5.3	7.1	1.54	6.66	4.46	1.34	354	5.7	36.7	8.93	58.02	54.86	557.7	0	0	NA	0	0	0	0	0	0.16	0.1	6.5	10.17	5.20748	7.87653	80.0718	95.4	127.8
737	B	2	58	2	2	1	7	3	1	151	60	26.31	143	86	91	82	4.9	5.8	1.63	6.45	3.33	1.61	316	5.3	41.4	11.13	32.32	115.6	402.7	0	0	NA	0	0	0	0	0	0.1	0.08	2.9	3.48	4.36636	16.5973	57.8177	88.2	104.4
738	B	2	61	2	1	2	7	3	3	158	48	19.23	120	70	72	88	5.2	5	0.94	5.42	3.04	1.64	216	5.9	29	7.86	9	54.08	27.69	0	1	NA	1	0	0	0	0	0.15	0.33	1.15	0.51	15.9794	7.76454	3.97559	93.6	90
739	B	1	55	2	2	2	7	3	1	165	67	24.61	145	129	94	103	5.4	7.8	0.93	4.35	2.44	1.2	351	6.2	41	6.58	24.62	83.4	487.8	0	0	NA	0	0	0	0	1	0.08	0.05	3.74	5.85	4.19969	11.9742	70.0359	97.2	140.4
740	B	2	54	2	2	2	6	2	2	150	56	24.89	130	88	85	95	5.4	8.6	5.1	8.33	3.63	1.59	322	6.2	39.1	10.03	34.71	143.9	1012	0	0	NA	0	0	0	0	1	0.07	0.03	3.46	7.03	2.18236	20.6604	145.298	97.2	154.8
741	B	2	54	2	2	2	1	2	2	155	49	20.4	136	71	72	67	4.8	6.6	1.03	6.1	3.24	2.04	201	5.8	37.5	5.4	34.59	42.86	344	0	0	NA	0	0	0	0	0	0.13	0.1	6.41	8.03	8.12461	6.15363	49.3898	86.4	118.8
742	B	1	54	2	2	1	2	3	2	168	73	25.86	153	104	91	82	5.3	8.3	2.01	5.3	2.97	1.45	416	5.4	31.4	17.54	75.82	70.37	813	0	0	NA	0	0	0	0	1	0.25	0.09	4.32	11.55	3.656	10.1034	116.726	95.4	149.4
743	B	2	61	NA	1	2	1	3	1	151	72	31.58	117	80	103	93	6	9.9	1.6	5.12	2.91	1.26	363	6.6	42	8.35	26.26	120.4	917.3	0	1	NA	1	1	1	0	0	0.07	0.03	3.14	7.62	2.24159	17.2864	131.701	108	178.2
744	B	2	51	2	2	NA	2	3	3	149	66	29.73	105	58	88	74	6.1	9	1.38	4.71	2.65	1.26	230	6.4	46.9	11.5	62.22	109.9	946.9	0	0	NA	0	1	0	0	1	0.1	0.07	5.41	8.62	2.36608	15.7789	135.951	109.8	162
745	B	1	49	2	2	2	2	2	2	151	53	23.24	122	89	74	101	5.1	5.9	0.87	5.44	2.66	1.93	253	5.2	31.5	0.22	8.37	16.73	121.9	0	0	NA	0	0	0	0	0	0.01	0.07	38.05	7.29	21.4546	2.40201	17.5018	91.8	106.2
746	B	2	55	2	2	3	2	3	2	162	75	28.58	114	68	95	77	5.5	7.5	3.32	5.94	2.57	1.4	416	6	31.5	21.32	84.07	126.5	507.8	0	0	NA	0	0	0	0	0	0.17	0.17	3.94	4.01	3.23097	18.1622	72.9074	99	135
747	B	1	54	2	2	3	7	3	2	162	70	26.67	138	94	93	78	4.9	8.5	3.78	8.19	4.02	1.6	448	6.1	57.1	6.11	38.68	80.4	729.7	1	0	NA	0	0	0	0	1	0.08	0.05	6.33	9.08	3.74223	11.5434	104.767	88.2	153
748	B	2	59	2	2	2	1	3	2	154	56	23.61	95	61	81	87	4.8	8	1.01	5.68	3.13	1.85	300	5.7	39.2	2.7	4.32	40.26	91.55	0	0	NA	0	0	0	0	1	0.07	0.05	1.6	2.27	13.5532	5.78033	13.1443	86.4	144
749	B	2	54	2	2	1	2	3	1	150	54	24	120	65	81	NA	5.2	7.2	1.45	5.36	2.96	1.66	339	5.9	40.2	3.8	41.32	66.29	321.3	0	0	NA	0	0	0	0	0	0.06	0.13	10.87	4.85	6.01251	9.51759	46.1307	93.6	129.6
750	B	1	43	2	2	3	7	3	3	167	71	25.46	130	78	86	75	5	5.6	2.04	5.2	3.18	1.19	472	5.6	46	9.79	43.93	130.2	429.8	1	0	NA	0	0	0	0	0	0.08	0.1	4.49	3.3	3.93678	18.6935	61.7085	90	100.8
751	B	2	61	1	1	2	6	3	3	150	56	24.89	108	68	100	65	5.5	6.7	2.57	6.72	3.57	1.55	279	6.1	32.3	2.78	19.25	55.94	254	0	1	NA	1	0	0	0	0	0.05	0.08	6.92	4.54	7.17492	8.03159	36.4681	99	120.6
752	B	2	48	2	2	3	7	3	3	155	60	24.97	119	99	81	81	4.9	7.8	0.7	5.14	2.71	1.71	372	5.5	35.5	5.23	36.97	57.85	175.7	0	0	NA	0	0	0	0	1	0.09	0.21	7.07	3.04	8.4399	8.30581	25.2261	88.2	140.4
753	B	2	46	2	2	3	7	3	3	159	52	20.57	119	81	76	91	5	6.2	0.66	5.45	2.6	1.83	237	5	41.3	3.73	27.04	27.5	138	0	0	NA	0	0	0	0	0	0.14	0.2	7.25	5.02	15.3292	3.94831	19.8134	90	111.6
754	B	1	51	2	2	3	7	3	3	154	52	21.93	119	81	76	67	5.7	6	0.9	5.85	2.98	2.06	349	5.7	43.5	4.47	30.6	33.29	161.7	0	0	NA	0	0	0	0	0	0.13	0.19	6.85	4.86	11.7621	4.77961	23.2161	102.6	108
755	B	1	48	2	2	2	1	3	3	160	73	28.52	114	77	95	79	4.9	9	3.07	5.11	2.82	1.17	468	5.5	35.9	6.19	38.65	129.2	588	1	0	NA	0	0	0	0	1	0.05	0.07	6.24	4.55	3.0805	18.5499	84.4221	88.2	162
756	B	2	67	1	1	1	7	3	3	155	65	27.06	131	76	89	89	5	7.1	2.49	4.87	2.71	1.24	306	5.8	27.5	6.96	49.6	87.35	410.1	0	0	NA	0	0	0	0	0	0.08	0.12	7.13	4.69	4.77304	12.5413	58.8801	90	127.8
757	B	1	70	2	2	3	3	3	2	158	50	20.03	185	98	74	90	6.7	12.3	0.91	5.41	2.8	1.84	240	6.3	41.2	9.18	37.11	31.94	121.7	0	1	NA	0	0	0	0	0	0.29	0.3	4.04	3.81	9.7914	4.58579	17.4731	120.6	221.4
758	B	1	55	2	2	2	7	3	3	173	69	23.05	119	76	87	92	4.6	5.4	1.01	4.35	2.49	1.22	341	5.4	60	0.22	5.54	49.4	143.7	0	0	NA	0	0	0	0	0	0	0.04	25.18	2.91	11.6828	7.09261	20.6317	82.8	97.2
759	B	1	51	2	2	2	1	1	1	162	67	25.53	145	84	92	83	4.2	8.1	1.9	5.64	2.53	1.67	568	6.3	46.7	3.3	61.74	46.82	429.8	1	0	NA	0	0	0	0	1	0.07	0.14	18.71	9.18	7.20775	6.72218	61.7085	75.6	145.8
760	B	2	47	2	2	3	7	3	3	155	54	22.48	149	83	79	97	5.5	7	0.98	5.32	2.86	1.43	260	5.8	28	5.33	27.53	96.25	378.7	0	0	NA	0	0	0	0	0	0.06	0.07	5.17	3.93	4.36534	13.8191	54.3719	99	126
764	B	1	65	1	1	2	1	1	3	159	58	22.94	142	79	83	89	4.9	4.8	0.89	4.36	2.06	1.57	442	6.1	43.6	0.22	17.38	24.99	57.02	1	0	NA	0	0	0	0	0	0.01	0.3	79	2.28	24.7958	3.58794	8.18665	88.2	86.4
766	B	2	43	2	2	2	7	2	2	150	48	21.33	118	59	72	76	5.2	5.8	0.75	5.93	2.24	2.49	223	5.6	33	1.28	11.28	38.75	70.5	0	0	NA	0	0	0	0	0	0.03	0.16	8.81	1.82	15.7266	5.56353	10.122	93.6	104.4
767	B	1	47	2	2	3	7	2	2	162	74	28.2	141	85	97	70	5.9	11.6	25.6	8.5	1.09	1.42	295	5.9	30.2	79.9	285.25	69.26	463.4	0	1	NA	0	0	0	0	0	1.15	0.62	3.57	6.69	3.96522	9.94401	66.5327	106.2	208.8
769	B	1	55	2	2	1	6	3	3	164	77	28.63	155	82	100	80	4.9	4.5	0.84	3.79	2.01	1.09	381	5.5	49.3	9.68	24.1	90.65	77.79	0	0	NA	0	0	0	0	0	0.11	0.31	2.49	0.86	9.22805	13.0151	11.1687	88.2	81
770	B	1	62	2	1	1	7	3	3	175	67	21.88	136	73	87	72	4.5	4	1.94	6.49	3.94	1.17	562	5.6	40	12.73	17.11	93.83	42.79	1	0	NA	0	0	0	0	0	0.14	0.4	1.34	0.46	11.0518	13.4716	6.14358	81	72
771	B	2	60	2	1	3	7	3	3	149	53	23.87	118	66	79	73	4.9	6.8	2.42	5.12	3.03	1.21	286	6.1	28.8	3.44	34.32	64.4	238.4	0	1	NA	1	0	0	0	0	0.05	0.14	9.98	3.7	7.31925	9.24623	34.2283	88.2	122.4
772	B	2	53	2	2	3	7	3	3	155	61	25.39	120	71	82	78	5.1	6.8	0.92	5.84	3.3	1.53	263	5.9	50	0.22	9.21	58.9	238.4	0	0	NA	0	0	0	0	0	0	0.04	41.86	4.05	7.50697	8.45657	34.2283	91.8	122.4
774	A	2	58	2	2	1	7	2	2	157	68	27.59	144	88	102	79	6	11.9	3.2	5.77	3.43	1.24	303	6.9	29.2	47.02	101.15	246	1375	0	1	NA	0	1	1	0	0	0.19	0.07	2.15	5.59	1.18254	35.3195	197.416	108	214.2
775	B	1	65	1	1	2	7	3	3	164	58	21.56	112	79	73	66	4.7	6.4	1.64	6.94	4.38	1.74	373	5.2	49.1	8.95	37.54	28.49	227.6	0	1	NA	1	0	0	0	0	0.31	0.16	4.19	7.99	12.5437	4.09045	32.6777	84.6	115.2
776	A	2	45	2	2	2	7	3	3	153	60	25.63	126	87	89	76	4.6	10.3	4.67	7.01	3.48	1.52	303	6.1	24.1	36.27	82.7	175.7	3239	0	0	NA	0	0	0	0	1	0.21	0.03	2.28	18.43	1.20683	25.2261	465.039	82.8	185.4
777	A	1	57	2	2	NA	7	3	3	162	65	24.77	137	83	87	72	6.2	8.6	20.5	5.54	0.71	0.95	408	7	46.9	2.58	8.95	24.96	18.33	0	0	NA	0	1	1	0	1	0.1	0.49	3.47	0.73	24.5774	3.58363	2.63173	111.6	154.8
778	A	2	41	2	2	2	7	2	2	160	49	19.14	108	62	73	77	4.3	5	1.25	3.96	2.09	1.23	206	4.9	25.6	11.55	40.9	34.83	263.3	0	0	NA	0	0	0	0	0	0.33	0.16	3.54	7.56	12.0095	5.00072	37.8033	77.4	90
779	B	2	34	2	2	2	1	2	3	145	54	25.68	125	77	79	77	4.9	5.9	0.56	3.98	2.16	1.44	357	4.8	46.3	11.64	46.57	52.71	251.7	0	0	NA	0	0	0	0	0	0.22	0.19	4	4.78	8.39833	7.56784	36.1378	88.2	106.2
780	A	2	46	2	2	2	7	3	2	158	63	25.24	112	71	85	83	5.2	6	1.63	4.75	2.1	1.69	285	5	29.6	17.74	65.92	162.4	394.2	0	0	NA	0	0	0	0	0	0.11	0.17	3.72	2.43	3.3729	23.3166	56.5973	93.6	108
781	B	1	37	1	2	2	7	3	3	162	55	20.96	121	85	81	90	4.9	9.5	2.66	6.46	3.83	1.58	463	5.6	63.8	27.01	171.8	64.55	983.4	1	0	NA	0	0	0	0	1	0.42	0.17	6.36	15.23	3.54226	9.26777	141.192	88.2	171
782	A	2	49	2	2	2	7	3	2	152	53	22.94	105	61	80	77	4.8	6.7	1.49	4.5	2.27	1.54	351	5.4	31.8	12.63	66.53	62.87	312.6	0	0	NA	0	0	0	0	0	0.2	0.21	5.27	4.97	6.77953	9.02656	44.8816	86.4	120.6
783	B	2	60	2	1	1	7	3	3	157	63	25.56	152	91	90	84	6.1	9.6	1.73	7.82	4.9	1.67	457	5.9	40.3	15.79	107.3	81.99	613.5	1	0	NA	0	0	0	0	1	0.19	0.17	6.8	7.48	3.3116	11.7717	88.0833	109.8	172.8
784	A	1	48	2	2	2	7	3	3	158	64	25.64	122	61	92	68	4.5	7.2	1.83	6.2	3.62	1.47	359	5.4	52.3	20.21	128.53	57.11	499.9	0	0	NA	0	0	0	0	0	0.35	0.26	6.36	8.75	5.97987	8.19957	71.7732	81	129.6
785	B	2	34	2	2	3	7	3	3	155	47	19.56	117	82	72	121	4.9	10.2	0.76	4.23	2.46	1.37	283	5.1	35.8	9.57	134.8	38.75	943.4	0	0	NA	0	0	0	0	1	0.25	0.14	14.09	24.35	4.61177	5.56353	135.449	88.2	183.6
786	A	2	30	2	2	2	7	2	1	152	52	22.51	95	74	76	101	4.8	5.2	0.92	3.76	1.94	1.25	276	4.9	35.9	16.28	51.47	73.29	345.2	0	0	NA	0	0	0	0	0	0.22	0.15	3.16	4.71	6.37813	10.5226	49.5621	86.4	93.6
787	B	2	64	2	1	3	7	3	3	155	60	24.97	135	87	90	85	5.2	5.9	2.21	5.99	3.79	1.33	386	5.4	40.4	14.63	50.67	91.19	593.7	0	1	NA	1	0	0	0	0	0.16	0.09	3.46	6.51	4.07597	13.0926	85.2405	93.6	106.2
788	A	2	55	2	2	2	7	3	3	152	53	22.94	118	66	80	74	5.1	4.9	1.07	5.62	2.88	1.86	270	5.4	36.6	15.19	35.11	47.87	366.6	0	0	NA	0	0	0	0	0	0.32	0.1	2.31	7.66	7.69335	6.87294	52.6346	91.8	88.2
789	B	2	49	2	2	1	7	3	3	146	45	21.11	96	56	72	96	8.1	7.7	0.62	4.97	3.15	1.32	317	5.8	49.3	33.34	62.15	144.8	341.3	0	1	NA	0	0	0	0	0	0.23	0.18	1.86	2.36	2.57846	20.7897	49.0022	145.8	138.6
790	A	2	27	2	2	2	7	2	2	147	44	20.36	96	51	53	81	4.4	5.8	0.64	4.49	1.8	1.85	361	5.1	20.9	11.1	45.01	26.85	311.6	0	0	NA	0	0	0	0	0	0.41	0.14	4.05	11.61	12.1181	3.85499	44.738	79.2	104.4
791	A	2	21	2	2	2	1	2	2	164	47	17.47	101	73	69	131	5.2	6.1	1.13	3.13	1.43	1.21	313	4.5	18.7	31.81	156.08	161.5	641.2	0	0	NA	0	0	0	0	0	0.2	0.24	4.91	3.97	2.80398	23.1874	92.0603	93.6	109.8
792	B	2	42	2	2	2	2	3	1	145	54	25.68	113	81	80	83	5.2	5.7	1.53	6.55	4.5	1.37	361	5.4	45.5	9.94	129.5	78.23	612.7	0	0	NA	0	0	0	0	0	0.13	0.21	13.03	7.83	4.4214	11.2319	87.9684	93.6	102.6
793	A	1	33	2	2	2	7	3	2	176	63	20.34	94	57	79	62	4.7	3.3	1.18	4.28	2.35	1.25	321	5	42.8	11.56	26.3	52.47	129.9	0	0	NA	0	0	0	0	0	0.22	0.2	2.28	2.48	12.9019	7.53338	18.6504	84.6	59.4
794	B	1	42	2	2	3	7	3	3	168	58	20.55	110	71	78	85	4.7	11.8	0.84	5.21	3.16	1.56	412	5.7	70	6.33	76.94	21.35	570.9	0	1	NA	0	0	0	0	0	0.3	0.13	12.15	26.74	7.81513	3.06533	81.967	84.6	212.4
795	A	2	35	1	2	2	1	2	2	162	56	21.34	94	55	70	86	5	5.8	0.72	3.67	1.68	1.28	281	4.6	44.9	11.47	45.6	36.52	129.9	0	0	NA	0	0	0	0	0	0.31	0.35	3.98	3.56	13.5087	5.24336	18.6504	90	104.4
796	A	2	29	2	2	2	1	2	2	147	45	20.82	111	59	75	111	5.4	8.6	1.15	4.67	2.5	1.53	446	5.5	31.4	11.39	20.75	122.5	4394	1	0	NA	0	0	0	0	1	0.09	0	1.82	35.87	1.1966	17.5879	630.869	97.2	154.8
797	A	1	35	2	2	2	7	3	3	162	79	30.1	132	81	95	96	5	5.4	1.73	4.56	3.01	1.04	410	5.1	65	21.69	85.64	158.4	589	0	0	NA	0	0	0	0	0	0.14	0.15	3.95	3.72	3.11905	22.7423	84.5657	90	97.2
798	B	2	42	2	2	2	7	3	3	160	65	25.39	120	87	92	96	6.1	12	1.04	4.42	2.77	1.11	403	6.2	30.7	32.88	95.42	160.4	1822	0	1	NA	0	0	0	0	0	0.2	0.05	2.9	11.36	1.3061	23.0294	261.594	109.8	216
799	A	1	30	1	2	2	7	1	1	179	96	29.96	119	72	101	78	4.8	6.2	7.55	5.03	0.82	0.96	578	5.2	32	16.88	49.84	136.6	539.6	1	0	NA	0	0	0	0	0	0.12	0.09	2.95	3.95	3.50428	19.6123	77.4731	86.4	111.6
800	B	1	71	2	2	3	7	3	3	165	64	23.51	128	79	84	84	4.8	7.9	1.3	6.39	3.77	1.69	429	5.5	47	11.97	54.39	29.55	409.3	1	0	NA	0	0	0	0	1	0.41	0.13	4.54	13.85	8.70401	4.24264	58.7653	86.4	142.2
801	A	1	30	2	2	1	1	2	2	162	62	23.62	123	59	83	99	4.7	4.9	3.17	6.27	3.24	1.2	418	5.2	48.6	18.15	96.12	62.71	200.6	0	0	NA	0	0	0	0	0	0.29	0.48	5.3	3.2	8.96586	9.00359	28.8011	84.6	88.2
802	B	2	39	2	2	2	7	3	3	138	58	30.46	103	69	88	78	4.6	7.4	0.99	5.5	3.11	1.69	336	4.9	46.7	17.38	117.7	34.32	405	0	0	NA	0	0	0	0	0	0.51	0.29	6.77	11.8	8.48291	4.92749	58.1479	82.8	133.2
803	A	2	40	2	2	2	1	2	2	157	60	24.34	96	56	77	91	4.5	5.4	0.84	3.67	1.73	1.32	320	4.9	38.4	13.02	51.25	39.75	219.1	0	0	NA	0	0	0	0	0	0.33	0.23	3.94	5.51	11.4304	5.70711	31.4573	81	97.2
804	B	1	55	2	2	2	7	3	3	164	52	19.33	122	80	71	86	4.6	5.4	1.1	6.25	3.99	1.63	344	5.4	70	15.04	74.46	22.08	249.1	0	0	NA	0	0	0	0	0	0.68	0.3	4.95	11.28	14.7459	3.17014	35.7645	82.8	97.2
805	A	1	45	2	2	3	7	3	3	167	78	27.97	126	75	91	76	4.9	9.3	10.6	7.49	0.74	1.26	416	5.9	37.2	26.47	109.85	80.03	742.1	0	0	NA	0	0	0	0	1	0.33	0.15	4.15	9.27	3.61693	11.4903	106.547	88.2	167.4
806	B	2	39	2	2	2	7	2	2	147	42	19.44	111	73	66	98	4.8	5.5	0.69	4.39	2.37	1.49	275	5	38.5	10.12	49.95	32.12	311.2	0	0	NA	0	0	0	0	0	0.32	0.16	4.94	9.69	10.481	4.61163	44.6805	86.4	99
807	A	1	53	2	2	2	1	2	3	160	75	29.3	128	89	91	71	4.3	7.1	3.07	6.04	3.67	1.22	440	5.4	40.3	13.67	70.53	49.39	694.6	1	0	NA	0	0	0	0	0	0.28	0.1	5.16	14.06	5.76619	7.09117	99.7272	77.4	127.8
808	B	2	44	2	2	2	2	3	1	152	53	22.94	117	82	76	92	5.1	6	0.52	3.48	1.61	1.45	253	4.2	28.6	13.36	51.34	39.24	321.4	0	0	NA	0	0	0	0	0	0.34	0.16	3.84	8.19	8.64631	5.63388	46.145	91.8	108
809	A	1	52	NA	2	2	1	2	2	176	72	23.24	140	87	85	110	5.2	7.7	1.76	4.5	2.28	1.48	481	5.3	50.1	21.87	95.82	48.7	474.2	1	0	NA	0	0	0	0	0	0.45	0.2	4.38	9.74	5.92118	6.9921	68.0833	93.6	138.6
810	A	2	52	2	2	2	1	2	2	151	56	24.56	144	77	78	76	5.4	8.5	0.56	5.39	2.78	1.79	258	5.6	27.1	11.96	52.29	59.93	856.2	0	0	NA	0	0	0	0	1	0.2	0.06	4.37	14.29	3.81218	8.60445	122.929	97.2	153
811	B	2	60	2	1	2	1	2	1	149	65	29.28	141	80	92	97	5.1	10	1.86	5.84	3.49	1.52	395	5.6	43.1	13.33	61.83	92.02	1093	0	0	NA	0	0	0	0	1	0.14	0.06	4.64	11.88	2.67055	13.2118	156.927	91.8	180
812	A	2	35	2	2	3	1	3	3	159	54	21.36	88	60	66	86	4.6	5.6	0.92	4.98	2.36	1.88	283	4.9	33.9	11.52	34.2	29.07	173	0	0	NA	0	0	0	0	0	0.4	0.2	2.97	5.95	14.741	4.17373	24.8385	82.8	100.8
813	A	2	62	2	2	2	1	2	2	154	48	20.24	117	76	76	69	4.7	5.3	1.15	5.59	3.28	1.4	316	5.3	39	10.99	37.78	40.7	513.2	0	0	NA	0	0	0	0	0	0.27	0.07	3.44	12.61	7.51825	5.8435	73.6827	84.6	95.4
814	B	1	50	2	2	2	1	2	2	172	75	25.35	110	85	95	83	5.4	6.9	0.98	5.25	3.39	1.28	591	5.6	54.6	20.37	107.3	43.45	371.3	1	0	NA	0	0	0	0	0	0.47	0.29	5.27	8.55	7.07361	6.23833	53.3094	97.2	124.2
815	A	2	38	2	2	2	7	2	2	160	74	28.91	115	66	93	75	5.1	10.1	2.37	5.52	3.06	1.59	324	5.6	46.1	12.3	70.81	98.07	330.5	0	0	NA	0	0	0	0	1	0.13	0.21	5.76	3.37	4.28739	14.0804	47.4515	91.8	181.8
816	B	1	67	2	1	3	7	3	3	167	65	23.31	119	99	87	114	7.5	17.8	0.7	5.57	3.49	1.53	336	6.7	43.2	12.94	51.43	46.2	243.2	0	1	NA	0	1	1	0	0	0.28	0.21	3.97	5.26	4.85867	6.63317	34.9174	135	320.4
817	A	2	35	2	2	2	7	2	2	162	110	41.91	127	71	79	90	5	5.9	2.14	6.05	3.54	1.51	388	5.3	35.7	16.19	88.57	52.53	166.3	0	0	NA	0	0	0	0	0	0.31	0.53	5.47	3.17	9.7774	7.542	23.8765	90	106.2
818	A	1	43	2	2	2	7	2	3	168	76	26.93	137	87	92	82	6.1	7.3	1.97	4.61	2.59	1.32	381	5.3	39.3	16.17	67.55	62.79	413.3	0	0	NA	0	0	0	1	0	0.26	0.16	4.18	6.58	4.95076	9.01508	59.3396	109.8	131.4
819	B	2	60	2	1	1	7	3	3	148	58	26.48	134	97	91	94	5.6	12.4	3.85	4.69	2.14	1.24	337	5	28.5	15.03	64.44	40.26	782.9	0	1	NA	0	0	0	0	0	0.37	0.08	4.29	19.45	4.23418	5.78033	112.405	100.8	223.2
820	A	1	46	2	2	2	67	2	2	174	74	24.44	133	87	84	58	5.2	4	4.68	4.77	1.97	1.2	425	4.9	39.1	16.56	74.58	50.03	135.2	1	0	NA	0	0	0	0	0	0.33	0.55	4.5	2.7	11.6228	7.18306	19.4113	93.6	72
821	B	2	49	2	2	1	6	2	2	156	81	33.28	152	101	104	95	7	7.2	3.26	4.55	2.31	1.09	332	5.2	29.9	41.26	186.6	762.1	1189	0	1	NA	0	0	0	0	0	0.05	0.16	4.52	1.56	0.63656	109.419	170.711	126	129.6
822	A	2	20	1	2	2	1	2	2	166	53	19.23	88	56	67	97	4.5	5.1	1.4	3.89	1.7	1.53	406	5.1	27.9	9.35	62.94	71.6	323.1	0	0	NA	0	0	0	0	0	0.13	0.19	6.73	4.51	7.00401	10.28	46.3891	81	91.8
823	B	1	69	2	1	2	7	3	3	172	61	20.62	109	78	76	89	5.7	5.6	1	4.16	1.81	1.68	397	5	54.3	17.74	22.39	85.44	139.9	0	0	NA	0	0	0	0	0	0.21	0.16	1.26	1.64	6.94948	12.267	20.0861	102.6	100.8
824	A	2	25	2	2	2	7	3	3	160	52	20.31	105	68	68	94	5	5.1	1.88	4.64	2.37	1.44	259	4.8	22.5	16.51	85.81	59.97	297.6	0	0	NA	0	0	0	0	0	0.28	0.29	5.2	4.96	7.43679	8.61019	42.7279	90	91.8
825	B	2	62	2	1	2	7	3	3	150	43	19.11	98	70	74	76	4.8	8.1	1.52	5.83	3.36	1.66	305	5.4	39.5	6.26	36.88	21.09	147.7	0	0	NA	0	0	0	0	1	0.3	0.25	5.89	7	16.4836	3.028	21.206	86.4	145.8
826	A	2	56	2	2	2	7	3	3	141	47	23.64	126	71	71	71	5.4	6.3	1.2	4.51	2.39	1.52	272	5.7	41.7	11.29	44.26	35	175.5	0	0	NA	0	0	0	0	0	0.32	0.25	3.92	5.01	11.343	5.02513	25.1974	97.2	113.4
827	B	2	37	2	2	2	1	2	2	157	76	30.83	133	75	86	86	5.4	6.8	0.84	4.29	2.54	1.3	321	5.4	39.8	11.69	99.91	49.12	582.9	0	0	NA	0	0	0	0	0	0.24	0.17	8.55	11.87	5.41137	7.0524	83.6899	97.2	122.4
828	A	2	64	2	2	1	7	1	1	168	71	25.16	143	92	86	80	5	8.4	1.97	3.52	1.34	1.41	480	5.4	39	15.36	69.12	74.49	602.2	1	0	NA	0	0	0	0	1	0.21	0.11	4.5	8.08	4.21112	10.6949	86.4609	90	151.2
829	B	2	57	2	2	3	7	3	3	166	77	27.94	120	73	97	78	5.1	9.8	1.15	5.32	2.95	1.69	286	5.2	41.8	11.65	82.95	34.18	342.5	0	0	NA	0	0	0	0	1	0.34	0.24	7.12	10.02	7.82399	4.90739	49.1744	91.8	176.4
831	A	2	49	2	2	NA	1	2	2	156	74	30.41	150	99	100	94	5	8.6	2.48	4.56	1.99	1.42	443	5	28.6	24.36	22.02	133.6	1214	1	0	NA	0	0	0	0	1	0.18	0.02	0.9	9.09	2.21177	19.1816	174.3	90	154.8
832	B	1	39	2	2	3	7	3	3	159	63	24.92	121	89	90	76	5.5	6.3	4.71	7.53	3.87	1.24	507	5.4	65.7	13.51	49.97	44.85	294.7	1	0	NA	0	0	0	0	0	0.3	0.17	3.7	6.57	7.78436	6.43934	42.3116	99	113.4
833	A	2	50	2	2	2	1	2	2	155	66	27.47	132	95	84	NA	4.8	6.9	2.18	5.19	2.62	1.39	155	5.3	27	13.94	43.28	53.62	202.2	0	0	NA	0	0	0	0	0	0.26	0.21	3.1	3.77	8.81728	7.69849	29.0309	86.4	124.2
834	B	1	66	2	1	2	7	3	3	160	50	19.53	132	101	77	94	5.6	8.5	1.53	4.44	2.12	1.62	377	5.1	31.8	47.43	73.15	146.2	551.5	0	1	NA	1	0	0	0	0	0.32	0.13	1.54	3.77	2.72689	20.9907	79.1816	100.8	153
835	A	2	54	1	2	1	1	2	2	159	59	23.34	185	94	80	NA	5.6	8.6	4.04	6.16	2.71	1.67	332	5.2	42	22.69	29.69	71.53	685.4	0	0	NA	0	0	0	0	1	0.32	0.04	1.31	9.58	3.72965	10.2699	98.4063	100.8	154.8
836	B	2	63	2	1	2	1	2	1	145	46	21.88	137	74	74	82	4.9	6.8	1.15	8.34	5.49	1.95	310	5.7	37.5	8.76	40.39	25.99	265.2	0	1	NA	1	0	0	0	0	0.34	0.15	4.61	10.2	11.7489	3.73151	38.0761	88.2	122.4
837	A	2	47	2	2	2	7	2	2	148	63	28.76	159	92	84	NA	4.9	7	1.11	5.2	2.8	1.4	193	5.5	30.5	10.21	55.46	53.68	577.3	0	0	NA	0	0	0	0	0	0.19	0.1	5.43	10.75	5.50672	7.70711	82.8859	88.2	126
838	B	1	65	2	1	2	1	2	2	155	44	18.31	118	76	68	74	5	4.2	0.85	5.69	3.31	1.68	402	5.2	70	11.58	68.48	16.23	139.8	0	0	NA	0	0	0	0	0	0.71	0.49	5.91	8.61	22.6744	2.33022	20.0718	90	75.6
839	A	1	34	2	2	2	7	3	3	161	73	28.16	128	82	88	NA	4.5	8.9	1.97	5.82	3.18	1.48	439	5.9	42.5	20.69	30.52	81.23	885.6	1	0	NA	0	0	0	0	1	0.25	0.03	1.48	10.9	3.5562	11.6626	127.15	81	160.2
840	B	2	42	2	2	2	1	2	2	154	56	23.61	122	83	80	NA	4.4	7.8	1.77	5.87	3.54	1.46	273	5.1	38.8	12.16	87.14	33.32	430.9	0	0	NA	0	0	0	0	1	0.36	0.2	7.17	12.93	8.49294	4.78392	61.8665	79.2	140.4
841	A	1	36	2	2	2	7	3	3	173	88	29.4	137	87	95	NA	4.9	8.8	3.57	5.06	1.34	2.52	582	5	48	44.7	60.53	87.88	855	1	0	NA	0	0	0	0	1	0.51	0.07	1.35	9.73	3.28131	12.6174	122.757	88.2	158.4
842	B	1	30	2	2	2	7	2	2	165	60	22.04	135	82	76	94	4.6	3.1	1.04	4	2.21	1.22	422	5.2	50.5	5.58	28.7	15.7	111.8	1	0	NA	0	0	0	0	0	0.36	0.26	5.14	7.12	29.0636	2.25413	16.0517	82.8	55.8
843	A	1	29	2	2	3	7	3	3	171	84	28.73	131	90	104	NA	4.8	7	2.36	6.65	4.2	1.31	416	5.2	32.2	16.55	71.53	43.28	765.9	0	0	NA	0	0	0	0	0	0.38	0.09	4.32	17.7	5.49479	6.21393	109.964	86.4	126
844	A	1	42	2	2	3	7	3	3	176	84	27.12	145	98	91	NA	5.5	5.4	4.17	5.65	2.99	1.08	435	5.5	38.9	51.54	123.9	138	367.4	1	0	NA	0	0	0	0	0	0.37	0.34	2.4	2.66	3.78466	19.8134	52.7495	99	97.2
845	B	2	39	2	2	3	7	3	3	157	49	19.88	115	72	73	80	5.2	4.7	0.51	5.89	3.43	1.78	353	5.1	41.1	10.93	36.58	22.32	161.7	0	0	NA	0	0	0	0	0	0.49	0.23	3.35	7.24	16.8298	3.20459	23.2161	93.6	84.6
846	A	1	34	1	2	2	1	2	2	172	63	21.3	110	80	72	96	4.8	6	2.89	5.32	2.99	1.42	540	5.3	38.9	28.28	76.08	83.22	282.7	1	0	NA	0	0	0	0	0	0.34	0.27	2.69	3.4	6.15941	11.9483	40.5887	86.4	108
847	B	2	48	2	2	3	1	3	2	168	60	21.26	180	91	85	102	5.3	10.8	0.88	4.5	2.6	1.36	366	5.3	30.3	12.59	62.06	49.65	1169	0	0	NA	0	0	0	0	1	0.25	0.05	4.93	23.54	3.40587	7.1285	167.839	95.4	194.4
848	A	2	51	2	2	2	1	2	2	155	48	19.98	98	58	66	NA	4.2	5.1	1.72	4.18	1.68	1.65	292	5	39	8.24	24.28	34.29	210.6	0	0	NA	0	0	0	0	0	0.24	0.12	2.95	6.14	13.5127	4.92319	30.2369	75.6	91.8
849	B	2	48	2	2	2	7	3	3	147	51	23.6	113	75	83	66	5.1	6.6	0.69	5.27	3.36	1.44	276	5.5	47	5	44.69	26.44	254	0	0	NA	0	0	0	0	0	0.19	0.18	8.94	9.61	11.6346	3.79612	36.4681	91.8	118.8
850	A	1	39	1	2	2	7	2	2	171	77	26.33	131	78	92	NA	5.3	6.6	5.28	4.98	1.68	1.26	442	5.5	35.2	18.42	43.39	66.18	347.1	1	0	NA	0	0	0	0	0	0.28	0.13	2.36	5.24	5.89226	9.50179	49.8349	95.4	118.8
851	B	2	42	2	2	3	3	3	2	153	60	25.63	122	85	83	91	7.1	8.5	1.9	7.15	4.53	1.69	281	5.6	30.7	19.73	113.8	182.7	474.8	0	1	NA	0	0	0	0	0	0.11	0.24	5.77	2.6	2.12163	26.2312	68.1694	127.8	153
852	A	1	36	2	2	3	7	3	3	175	70	22.86	101	64	82	NA	9.5	24	4.76	6.42	3.39	1.35	430	9.2	26	34.29	56.3	58.36	251.3	1	1	NA	0	1	1	0	0	0.59	0.22	1.64	4.31	3.22696	8.37904	36.0804	171	432
853	B	2	25	2	2	2	7	2	2	160	64	25	141	85	83	NA	4.6	5.6	0.57	2.72	1.39	1.01	328	4.7	35.7	22.36	61.21	91.63	578.9	0	0	NA	0	0	0	0	0	0.24	0.11	2.74	6.32	4.55797	13.1558	83.1156	82.8	100.8
854	A	2	33	2	2	2	2	2	2	149	55	24.77	112	72	76	NA	5.1	5.9	1.58	3.25	1.19	1.41	281	4.8	30.7	19.11	64.95	81.88	587.44	0	0	NA	0	0	0	0	0	0.23	0.11	3.4	7.17	4.41358	11.7559	84.3417	91.8	106.2
855	B	1	59	2	2	2	7	3	3	152	52	22.51	122	69	79	82	4.8	5.9	0.59	5.79	3.85	1.5	433	5.3	49	13.2	103.4	28.84	280.3	1	0	NA	0	0	0	0	0	0.46	0.37	7.83	9.72	11.4364	4.1407	40.2441	86.4	106.2
856	A	1	53	2	2	2	1	2	2	161	61	23.53	135	93	76	NA	4.7	2.9	1.7	5.88	3.51	1.51	367	5.1	36.8	14.33	23.93	33.15	28.74	0	0	NA	0	0	0	0	0	0.43	0.83	1.67	0.87	28.5872	4.75951	4.12635	84.6	52.2
857	B	2	53	2	2	2	7	3	3	147	48	22.21	90	73	76	92	4.7	5.6	0.61	5.78	3.58	1.73	293	5.1	46	7.19	59.07	24.13	218.2	0	0	NA	0	0	0	0	0	0.3	0.27	8.22	9.04	14.5455	3.46447	31.3281	84.6	100.8
858	A	2	53	2	2	2	7	2	3	150	60	26.67	125	82	71	NA	4.6	6.7	2.81	6.55	3.65	1.66	373	5.4	40.9	17	33.37	45.58	238.9	0	0	NA	0	0	0	0	0	0.37	0.14	1.96	5.24	9.42643	6.54415	34.3001	82.8	120.6
859	B	2	58	2	2	2	7	3	3	155	58	24.14	117	68	83	97	4.8	10	1.99	6.52	4.1	1.5	322	5.5	40	5.51	44.44	46.94	371.8	0	0	NA	0	0	0	0	1	0.12	0.12	8.07	7.92	6.54913	6.73941	53.3812	86.4	180
860	A	2	32	1	2	2	1	3	2	167	74	26.53	111	64	83	NA	4.9	5.6	1.94	4.45	2.86	1.28	335	4.9	28.3	14.12	44.95	44.97	242.2	0	0	NA	0	0	0	0	0	0.31	0.19	3.18	5.39	9.49412	6.45657	34.7739	88.2	100.8
861	B	2	54	2	2	3	7	3	3	152	55	23.81	117	61	88	77	5.6	8.1	1.57	4.73	2.71	1.34	403	5.5	47.2	26.22	117.2	51.47	283.5	0	0	NA	0	0	0	0	1	0.51	0.41	4.47	5.51	6.7289	7.38981	40.7035	100.8	145.8
862	A	1	69	2	2	1	3	2	2	151	54	23.68	142	85	72	NA	4.72	4.84	0.98	3.9	1.17	2.05	408	5.7	49.4	15.33	88.49	65.5	236.8	0	0	NA	0	0	0	0	0	0.23	0.37	5.77	3.62	8.18727	9.40416	33.9986	84.96	87.12
863	B	1	46	2	2	3	7	3	1	164	64	23.8	120	75	84	82	5.2	10.2	0.76	4.82	3.05	1.29	352	5.2	57.8	14.53	74.47	33.27	526.8	0	0	NA	0	0	0	0	1	0.44	0.14	5.13	15.83	6.33533	4.77674	75.6353	93.6	183.6
864	A	2	60	2	2	2	1	1	2	149	49	22.07	119	75	78	NA	5.21	7.01	0.88	6.06	3.56	1.59	229	5.7	36.2	20.69	172.9	34.41	491.7	1	0	NA	0	0	0	0	0	0.6	0.35	8.36	14.29	7.20848	4.94042	70.5958	93.78	126.18
865	B	2	69	2	1	2	1	2	1	152	49	21.21	168	119	81	107	5.3	9.7	1.32	6.52	3.71	1.88	281	5.6	56.7	9.21	70.6	28.12	371.6	0	1	NA	1	0	0	0	0	0.33	0.19	7.67	13.21	8.18671	4.03733	53.3525	95.4	174.6
866	A	2	42	2	2	3	7	3	3	153	55	23.5	122	81	81	79	5.57	5.96	1.26	4.51	2.76	1.24	238	5.2	30.5	14.41	39.06	56.72	252.6	0	0	NA	0	0	0	0	0	0.25	0.15	2.71	4.45	7.29062	8.14358	36.267	100.26	107.28
867	B	2	55	2	2	2	7	3	3	153	41	17.51	125	81	62	83	5	5	0.71	5.3	2.61	2	226	5.1	45.6	12.14	41.57	29.56	224.4	0	0	NA	0	0	0	0	0	0.41	0.19	3.42	7.59	12.6316	4.24408	32.2182	90	90
868	A	1	64	1	2	1	1	3	3	159	NA	NA	167	113	88	90	5.35	9.15	0.86	7.36	3.8	2.14	371	6.2	49.7	14.37	69.19	40.86	787.5	0	0	NA	0	0	0	0	1	0.35	0.09	4.81	19.27	4.77594	5.86648	113.065	96.3	164.7
869	B	1	63	2	1	3	7	3	3	163	76	28.6	137	93	95	81	5.7	10.9	1.05	5.7	3.59	1.46	500	6	50.7	15.05	89.86	30.94	368.3	1	0	NA	0	0	0	0	1	0.49	0.24	5.97	11.9	7.1583	4.44221	52.8787	102.6	196.2
870	A	2	47	2	2	3	7	3	3	154	57	24.03	124	68	80	NA	5.37	7.34	0.67	4.43	2.39	1.43	288	5.4	45.1	13.86	38.85	47.27	315.8	0	0	NA	0	0	0	0	0	0.29	0.12	2.8	6.68	7.15041	6.78679	45.341	96.66	132.12
871	B	2	58	2	2	1	7	3	3	147	55	25.45	149	85	88	128	6	4.4	2.79	5.58	3.03	1.31	359	5.5	43.9	19.75	115.1	55.42	1432	0	0	NA	0	0	0	0	0	0.36	0.08	5.83	25.84	3.41221	7.95693	205.599	108	79.2
872	A	2	51	2	2	3	7	3	3	166	77	27.94	145	75	89	NA	5.42	4.73	0.5	4.02	1.99	1.3	355	5.9	35.5	11.07	29.41	85.4	109.5	0	0	NA	0	0	0	0	0	0.13	0.27	2.66	1.28	8.08744	12.2613	15.7215	97.56	85.14
873	B	2	70	2	2	2	7	3	1	146	52	24.39	110	67	87	71	4.7	8.4	0.85	5.27	2.7	1.79	324	5.2	29.7	12.52	60.29	16.18	266.7	0	0	NA	0	0	0	0	1	0.77	0.23	4.82	16.48	14.5782	2.32304	38.2915	84.6	151.2
874	A	1	47	1	2	3	7	3	3	162	55	20.96	110	73	72	NA	4.63	6.46	2.21	5.95	3.1	1.71	370	6	34.9	10.79	53.28	23.31	181.5	0	0	NA	0	0	0	0	0	0.46	0.29	4.94	7.79	15.6306	3.34673	26.0589	83.34	116.28
875	B	2	52	2	2	2	7	3	3	143	36	17.6	93	70	68	98	5.3	5.5	0.66	6.04	4.18	1.5	383	4.4	41.3	8.13	43.75	32	217.2	0	0	NA	0	0	0	0	0	0.25	0.2	5.38	6.79	11.4546	4.5944	31.1845	95.4	99
876	A	2	52	1	1	2	5	2	2	152	64	27.7	143	85	88	NA	4.69	6.16	1.47	6.61	4.1	1.53	374	5.8	43.8	14.18	62.85	52.04	279.6	0	1	NA	1	0	0	0	0	0.27	0.22	4.43	5.37	8.25801	7.47164	40.1436	84.42	110.88
877	B	2	35	2	2	2	7	3	3	164	52	19.33	103	73	71	86	4.7	7.6	0.53	6.61	3.69	2	319	4.9	42.1	14	70.72	46.15	571.4	0	0	NA	0	0	0	0	0	0.3	0.12	5.05	12.38	6.02914	6.62599	82.0388	84.6	136.8
878	A	1	28	2	2	2	7	3	3	159	52	20.57	120	65	87	NA	4.82	6.58	1.26	2.32	4.59	1.5	465	5.9	40	14.15	48.42	43.96	453.4	1	0	NA	0	0	0	0	0	0.32	0.11	3.42	10.31	7.06055	6.31156	65.0969	86.76	118.44
879	B	1	37	2	2	2	7	3	3	167	58	20.8	119	75	78	87	4.8	5.6	0.81	5.07	1.92	2.49	371	5.3	70	11.97	61.27	60.54	425.9	0	0	NA	0	0	0	0	0	0.2	0.14	5.12	7.04	6.38272	8.69203	61.1486	86.4	100.8
880	A	2	42	2	2	2	1	3	3	152	57	24.67	100	59	72	69	5.19	6.23	0.97	4.27	2.36	1.41	299	5.6	44.9	12.84	38	89.52	585.4	0	0	NA	0	0	0	0	0	0.14	0.06	2.96	6.54	4.08955	12.8528	84.0488	93.42	112.14
881	B	1	63	1	1	2	7	3	2	165	52	19.1	144	87	83	69	6.7	7.9	0.76	6.39	3.72	1.92	405	5.3	54.6	17.46	94.17	20.81	466.5	0	1	NA	1	0	0	0	0	0.84	0.2	5.39	22.42	7.77009	2.9878	66.9777	120.6	142.2
882	A	2	56	2	2	2	1	2	2	157	61	24.75	123	83	83	NA	5.65	7.56	2	7.03	4.36	1.67	377	5.1	43	14.64	49.35	80.55	551.9	0	0	NA	0	0	0	0	0	0.18	0.09	3.37	6.85	3.96878	11.565	79.2391	101.7	136.08
883	B	1	33	2	2	3	7	3	2	163	70	26.35	120	84	88	90	5.1	5.4	0.87	5.53	3.6	1.41	580	5.3	70	6.7	127	52.68	256	1	0	NA	0	0	0	0	0	0.13	0.5	18.96	4.86	8.29319	7.56353	36.7552	91.8	97.2
884	A	1	35	2	2	2	1	2	2	171	77	26.33	108	77	81	NA	5.42	7.01	14.8	5.3	0.78	0.64	489	5.7	30.8	24.32	15.37	98.03	96.31	1	0	NA	0	0	0	0	0	0.25	0.16	0.63	0.98	6.83098	14.0747	13.8277	97.56	126.18
885	B	1	56	2	2	3	1	2	2	175	63	20.57	116	75	85	112	6.9	9	0.65	6.86	4.9	1.43	576	5.4	61.6	17.96	103.9	64.24	443	1	0	NA	0	0	0	0	1	0.28	0.23	5.79	6.9	4.09304	9.22326	63.6037	124.2	162
886	A	2	58	2	2	2	7	2	2	159	66	26.11	129	77	93	NA	4.45	8.94	0.61	4.98	2.25	1.81	319	5.5	37.1	11.67	52.78	80.51	753.6	0	0	NA	0	0	0	0	1	0.14	0.07	4.52	9.36	3.86876	11.5592	108.198	80.1	160.92
887	B	1	62	2	1	2	7	3	2	157	52	21.1	118	78	71	72	5	5.6	0.97	4.24	1.93	1.6	262	5.2	59.9	11	31.91	19.55	179.8	0	1	NA	1	0	0	0	0	0.56	0.18	2.9	9.2	17.0278	2.80689	25.8148	90	100.8
888	A	2	50	2	2	2	7	3	3	159	75	29.67	111	75	94	NA	6.64	8.36	2.59	4.44	2.36	1.14	335	5.6	31.4	60.27	108.21	307.3	1355	0	0	NA	0	0	0	0	1	0.2	0.08	1.8	4.41	1.08496	44.1206	194.544	119.52	150.48
889	B	2	60	2	1	3	7	3	3	158	48	19.23	135	93	77	112	6.3	17.3	0.55	4.64	2.54	1.6	427	5.7	54.2	15.47	65.94	37.58	759.2	1	1	NA	1	0	0	0	0	0.41	0.09	4.26	20.2	3.66779	5.39555	109.002	113.4	311.4
890	A	2	46	2	2	2	7	3	3	155	52	21.64	108	61	73	86	5.83	5.75	1.28	5.15	2.8	1.66	403	5.3	33.1	13.43	39.49	85.67	511.1	0	0	NA	0	0	0	0	0	0.16	0.08	2.94	5.97	4.16555	12.3001	73.3812	104.94	103.5
891	B	2	55	2	2	2	7	3	2	157	46	18.66	128	80	76	98	5.5	7.4	2.16	3.35	1.66	0.97	338	5.4	49.7	16.36	41.54	64.03	344.6	0	0	NA	0	0	0	0	0	0.26	0.12	2.54	5.38	5.67996	9.19311	49.476	99	133.2
892	A	2	57	2	2	2	7	2	2	153	53	22.64	94	74	75	NA	4.64	6.14	1.68	4.14	2.3	1.35	269	5.2	28.7	12.68	41.35	9.39	188.8	0	0	NA	0	0	0	0	0	1.35	0.22	3.26	20.11	25.3651	1.34817	27.107	83.52	110.52
893	B	2	41	2	2	2	7	3	3	147	54	24.99	118	81	80	91	5.2	8.3	1.43	5.64	3.51	1.51	288	5.1	37	11.37	80.88	26.29	1079	0	0	NA	0	0	0	0	1	0.43	0.07	7.11	41.04	5.41847	3.77459	154.917	93.6	149.4
894	A	2	26	2	2	2	7	2	3	177	54	17.24	105	72	63	NA	4.81	6.25	1.15	2.98	1.35	1.16	310	5.5	22.8	11.35	54.65	39.09	244.4	0	0	NA	0	0	0	0	0	0.29	0.22	4.81	6.25	10.0792	5.61235	35.0897	86.58	112.5
895	B	1	44	2	2	2	7	3	3	164	70	26.03	115	59	91	64	4.8	4.5	1.7	3.45	1.71	1.17	327	4.3	55.4	39.8	66.12	155.1	272.6	0	0	NA	0	0	0	0	0	0.26	0.24	1.66	1.76	4.49719	22.2685	39.1385	86.4	81
896	B	1	59	2	2	3	7	3	3	168	73	25.86	115	83	91	82	4.8	7.3	1.49	6.79	4.23	1.5	308	5.8	38.4	20.77	119.7	51.93	758.7	0	0	NA	0	0	0	0	0	0.4	0.16	5.76	14.61	4.94931	7.45585	108.93	86.4	131.4
897	A	2	46	2	2	2	1	2	2	155	50	20.81	104	71	71	84	5.06	4.45	0.41	4.37	2.36	1.48	240	5.4	26.4	9.89	37.42	45.32	171.7	0	0	NA	0	0	0	0	0	0.22	0.22	3.78	3.79	11.2491	6.50682	24.6518	91.08	80.1
898	A	2	44	2	2	2	1	3	3	155	54	22.48	104	66	71	70	4.72	5.78	1.13	4.37	2.5	1.4	292	5	36.7	10.54	43.73	50.12	218.4	0	0	NA	0	0	0	0	0	0.21	0.2	4.15	4.36	9.47587	7.19598	31.3568	84.96	104.04
899	A	1	54	2	2	2	7	2	2	169	70	24.51	117	58	85	67	4.8	6.6	2.27	4.98	2.91	1.2	455	4.3	44.3	10.03	8.71	23.34	58.6	1	0	NA	0	0	0	0	0	0.43	0.15	0.87	2.51	23.9225	3.35104	8.4135	86.4	118.8
900	A	1	54	2	2	3	7	3	3	170	73	25.26	142	97	89	97	5.4	9.5	2.72	6.82	3.97	1.52	425	6.8	31.6	9.62	13.65	49.91	336.2	1	0	NA	0	1	1	0	1	0.19	0.04	1.42	6.74	6.21497	7.16583	48.2699	97.2	171
901	A	2	55	2	2	3	7	3	3	154	63	26.56	116	74	94	78	5.4	8	2.46	6.08	3.42	1.55	313	6.6	42.6	5.84	9.42	55.83	505.2	0	0	NA	0	1	1	0	1	0.1	0.02	1.61	9.05	5.14047	8.01579	72.5341	97.2	144
902	A	2	42	1	2	2	1	2	3	157	46	18.66	101	76	72	87	4.8	3.9	0.67	3.8	1.8	1.56	332	4.7	38	5.88	64.95	29.32	166.1	0	0	NA	0	0	0	0	0	0.2	0.39	11.05	5.67	15.8209	4.20962	23.8478	86.4	70.2
903	A	2	45	2	2	3	1	2	1	157	71	28.8	136	77	94	91	5	10.6	1.07	5.99	3.41	1.66	301	6.3	43.5	9.88	15.64	107.8	709.5	0	0	NA	0	0	0	0	1	0.09	0.02	1.58	6.58	2.9521	15.4774	101.866	90	190.8
904	A	2	28	2	2	NA	1	2	2	154	56	23.61	101	68	76	NA	4.8	6.4	1.51	4.48	2.46	1.4	371	4.9	35.9	5.63	13.19	39.35	168.3	0	0	NA	0	0	0	0	0	0.14	0.08	2.34	4.28	11.6764	5.64968	24.1637	86.4	115.2
905	A	2	42	1	2	2	7	3	1	162	63	24.01	124	78	85	87	5.9	15.1	2.05	6.63	3.93	1.72	313	6.4	37.7	16.16	9.83	101.7	542.1	0	1	NA	0	1	0	0	0	0.16	0.02	0.61	5.33	2.71711	14.6016	77.832	106.2	271.8
906	A	2	63	2	2	1	7	3	3	151	61	26.75	151	92	88	82	7	14.1	5.22	5.92	2.6	1.2	316	7.1	30.9	45.72	12.6	172.1	1020	0	1	NA	0	1	1	0	0	0.27	0.01	0.28	5.93	1.40586	24.7093	146.447	126	253.8
907	A	1	38	2	2	3	1	2	2	172	61	20.62	120	77	73	66	4.8	5.8	1.48	4.89	2.45	1.74	412	5.5	38.6	5.32	7.61	23.14	121.2	0	0	NA	0	0	0	0	0	0.23	0.06	1.43	5.24	18.7728	3.32233	17.4013	86.4	104.4
908	A	1	69	2	2	3	7	3	3	157	62	25.15	138	84	82	92	5.2	9.4	2.18	7.33	4.6	1.75	559	6.5	70	18.27	112.47	44.39	372.6	1	0	NA	0	1	0	0	1	0.41	0.3	6.16	8.39	6.52823	6.3733	53.4961	93.6	169.2
909	A	2	44	2	2	3	7	3	3	151	61	26.75	137	80	83	NA	5.2	9.2	2.19	5.01	2.83	1.47	319	5.9	45.1	10.85	9.41	91.02	595	0	0	NA	0	0	0	0	1	0.12	0.02	0.87	6.54	3.57898	13.0682	85.4271	93.6	165.6
910	A	1	76	2	2	1	7	3	3	162	45	17.15	138	81	70	88	5.5	6.4	1.25	4.77	2.39	1.74	260	5.7	45.3	7.04	6.63	19.2	132	0	0	NA	0	0	0	0	0	0.37	0.05	0.94	6.88	17.754	2.75664	18.9519	99	115.2
911	A	2	73	2	2	3	7	3	3	155	64	26.64	149	88	87	65	5.2	7.2	2.33	4.89	2.48	1.44	326	5.4	33.8	10.87	9.91	53.84	224.9	0	0	NA	0	0	0	0	0	0.2	0.04	0.91	4.18	7.86709	7.73008	32.29	93.6	129.6
912	A	1	43	2	2	1	7	3	3	168	72	25.51	167	103	91	73	6.16	12.5	3.61	5.77	3.26	1.23	323	4.5	37.4	10.75	11.38	102.9	975.9	0	1	NA	0	0	0	0	0	0.1	0.01	1.06	9.48	2.16648	14.7739	140.115	110.88	225
913	A	1	42	2	2	2	7	2	2	173	72	24.06	174	90	87	88	5.1	6.2	3.06	6.56	3.61	1.75	325	4.9	54.2	11.78	31.52	64	233.6	0	0	NA	0	0	0	0	0	0.18	0.13	2.68	3.65	7.38666	9.1888	33.5391	91.8	111.6
914	A	2	45	2	2	3	1	2	2	157	55	22.31	122	83	76	94	4.8	5.6	1.48	5.35	2.96	1.66	236	5.7	31.6	5.69	24.43	29.33	177.9	0	0	NA	0	0	0	0	0	0.19	0.14	4.29	6.07	14.0494	4.21106	25.542	86.4	100.8
915	A	2	51	2	2	2	6	3	3	151	46	20.17	106	74	62	69	4.9	5.7	2.22	5.05	2.3	1.77	231	5.8	35.5	4.68	32.61	8.83	105.9	0	0	NA	0	0	0	0	0	0.53	0.31	6.97	11.99	33.7372	1.26777	15.2046	88.2	102.6
916	A	2	64	2	2	2	7	3	3	151	53	23.24	135	72	85	NA	5.5	9.2	1.85	3.19	1.21	1.31	272	4.1	26.4	8.1	31.58	35.45	547.9	0	0	NA	0	0	0	0	1	0.23	0.06	3.9	15.46	5.98502	5.08973	78.6648	99	165.6
917	A	1	62	2	2	2	6	3	3	177	89	28.41	101	75	101	73	8.1	15.5	1.33	4.99	2.73	1.51	379	8.7	53.1	22.07	78.02	205.2	356.4	0	1	NA	0	1	1	0	0	0.11	0.22	3.54	1.74	1.64884	29.4616	51.1701	145.8	279
918	A	2	63	2	2	2	7	3	3	150	51	22.67	143	66	82	67	5.3	7.7	1.89	6.27	3.7	1.72	293	6.3	45.7	5.35	10.15	71.85	707.6	0	0	NA	0	0	0	0	0	0.07	0.01	1.9	9.85	3.93968	10.3159	101.594	95.4	138.6
919	A	1	61	2	2	2	23	1	3	173	72	24.06	147	83	85	83	6.5	14.8	4.84	3.92	1.27	1.12	310	6.4	50.2	5.91	10.46	32.12	268.8	1	1	NA	0	1	0	0	0	0.18	0.04	1.77	8.37	6.68989	4.61163	38.593	117	266.4
920	A	2	59	1	2	1	6	1	2	151	52	22.81	158	85	77	93	5.9	11.3	2.7	5.86	3.26	1.55	452	5.9	40.8	12.8	62.37	78.64	1168	1	1	NA	0	0	0	0	0	0.16	0.05	4.87	14.85	2.45356	11.2907	167.696	106.2	203.4
921	A	1	58	2	2	2	7	3	2	167	47	16.85	99	68	71	56	5.4	8.2	1.27	4.42	2.49	1.34	323	5.9	56	4.79	25.92	17.04	255.4	0	0	NA	0	0	0	0	1	0.28	0.1	5.41	14.99	13.2538	2.44652	36.6691	97.2	147.6
922	A	2	44	1	2	2	34	3	2	157	57	23.12	141	102	85	100	5.4	8.5	1.95	6.95	4.23	1.68	355	6	36.3	4.74	15.35	29.96	444.7	0	0	NA	0	0	0	0	1	0.16	0.03	3.24	14.84	7.49052	4.30151	63.8478	97.2	153
923	A	2	69	2	2	2	1	2	2	154	65	27.41	109	73	85	82	6.1	14.1	2.55	5.64	3.31	1.36	393	6	27.8	7.08	118	88.78	1288	0	1	NA	0	0	0	0	0	0.08	0.09	16.67	14.51	1.99411	12.7466	184.925	109.8	253.8
924	A	1	22	2	2	2	1	2	3	170	74	25.61	132	92	84	95	5.2	4.5	2.68	5.51	3.26	1.32	404	5.6	47.2	12.43	9.89	60.07	87.33	0	0	NA	0	0	0	0	0	0.21	0.11	0.8	1.45	11.5801	8.62455	12.5384	93.6	81
925	A	2	34	1	2	2	7	3	3	155	56	23.31	103	65	75	101	5.2	6.7	1.35	5.16	3.18	1.4	374	5.9	28.6	5.62	34.32	29.87	423.9	0	0	NA	0	0	0	0	0	0.19	0.08	6.11	14.19	8.45022	4.28859	60.8615	93.6	120.6
926	A	2	31	1	2	2	1	2	2	155	57	23.73	103	67	81	92	5.7	9.1	1.6	5.71	3.67	1.23	388	6.3	29.8	5.84	11.75	87.98	1394	0	0	NA	0	0	0	0	1	0.07	0.01	2.01	15.84	2.33344	12.6317	200.144	102.6	163.8
927	A	2	27	1	2	2	7	3	3	154	52	21.93	100	75	68	111	5	9.4	1.52	6.8	4.01	2.02	238	5.5	24.4	11.66	44.75	90.63	2754	0	0	NA	0	0	0	0	1	0.13	0.02	3.84	30.39	1.79624	13.0122	395.406	90	169.2
928	A	1	25	NA	2	3	1	3	1	176	85	27.44	109	61	89	91	5.1	5.7	2.46	6.34	3.73	1.5	442	6.1	38.1	20.95	11.18	144.6	366.1	1	0	NA	0	0	0	0	0	0.14	0.03	0.53	2.53	3.8372	20.7609	52.5628	91.8	102.6
929	A	2	55	2	2	3	7	2	2	155	62	25.81	123	82	85	80	5.6	8	0.99	5.78	3.14	1.68	402	6.2	33.9	5.3	15.76	66.7	924.9	0	0	NA	0	0	0	0	1	0.08	0.02	2.97	13.87	3.44813	9.57645	132.793	100.8	144
930	A	2	59	1	2	2	7	2	2	160	49	19.14	97	62	72	NA	4.7	5.7	2.31	5.38	2.57	1.7	265	5.7	37	13.2	61.21	70.25	229.6	0	0	NA	0	0	0	0	0	0.19	0.27	4.64	3.27	7.62672	10.0861	32.9648	84.6	102.6
931	A	2	41	2	2	2	7	3	2	158	60	24.03	135	86	84	98	5.4	8.8	4.17	4.97	2.34	1.22	262	6.2	39.3	3.4	12.22	74.65	959.8	0	0	NA	0	0	0	0	1	0.05	0.01	3.59	12.86	3.1803	10.7179	137.803	97.2	158.4
932	A	1	59	2	2	2	23	1	1	178	71	22.41	120	69	85	53	6	8	2.05	5.86	3.73	1.35	633	6.3	49.4	20.4	109.06	47.32	308	1	0	NA	0	0	0	0	1	0.43	0.35	5.35	6.51	6.51189	6.79397	44.2211	108	144
933	A	2	59	2	2	2	7	1	1	151	58	25.44	152	91	88	83	5.3	6.6	2.72	6.46	3.74	1.56	413	6.1	34.8	13.4	57.49	67.73	576.3	1	0	NA	0	0	0	0	0	0.2	0.1	4.29	8.51	4.66577	9.72434	82.7423	95.4	118.8
934	A	2	53	1	2	1	23	3	3	157	52	21.1	132	83	85	92	7.2	16.9	4.08	6.53	3.74	1.42	452	6.1	29.8	21.5	110.6	141.9	2208	1	1	NA	0	0	0	0	0	0.15	0.05	5.14	15.56	1.01739	20.3733	317.014	129.6	304.2
935	A	2	47	2	2	2	6	2	2	164	53	19.71	104	72	71	71	5.2	8.7	1.54	8.42	4.79	2.46	290	5.8	45.8	3.4	11.49	34.82	223.6	0	0	NA	0	0	0	0	1	0.1	0.05	3.38	6.42	9.59604	4.99928	32.1034	93.6	156.6
936	A	2	60	2	2	1	7	2	2	150	49	21.78	185	105	77	83	11	17.5	1.84	5.18	2.8	1.64	262	10.4	33.3	5.4	12.8	25.24	46.26	0	1	NA	0	1	1	0	0	0.21	0.28	2.37	1.83	10.2887	3.62383	6.64178	198	315
937	A	2	70	2	1	2	7	3	3	152	56	24.24	103	80	86	80	7.2	11.3	1.83	6.58	3.92	1.6	371	7.3	53.7	13.4	56.78	62.39	284.8	0	1	NA	1	1	1	0	0	0.21	0.2	4.24	4.56	4.55602	8.95765	40.8902	129.6	203.4
938	A	2	42	1	2	2	1	2	2	155	63	26.22	120	86	82	99	8.3	15.6	2.16	6.64	4.29	1.4	396	6.7	36.1	23.6	86.66	111.9	1010	0	1	NA	0	1	1	0	0	0.21	0.09	3.67	9.03	1.55077	16.066	145.011	149.4	280.8
939	A	2	26	2	2	2	1	3	3	153	53	22.64	106	74	66	83	4.7	6.8	1.67	5.28	3.31	1.35	394	5.7	39.4	5.3	62.75	55.86	651.3	0	0	NA	0	0	0	0	0	0.09	0.1	11.84	11.66	5.29629	8.0201	93.5104	84.6	122.4
940	A	1	47	2	2	2	6	3	2	173	92	30.74	152	98	89	82	5.9	9.2	1.99	5.75	3.33	1.6	435	6.5	38.5	20.27	75.15	136.5	768.5	1	0	NA	0	1	0	0	1	0.15	0.1	3.71	5.63	2.33278	19.598	110.337	106.2	165.6
941	A	1	27	2	2	2	7	3	3	172	74	25.01	108	81	82	96	4.7	7.2	2.96	4.25	2.41	1.05	372	5.6	34.7	15.96	44.9	61.6	199.4	0	0	NA	0	0	0	0	0	0.26	0.23	2.81	3.24	8.16104	8.84422	28.6289	84.6	129.6
942	A	1	47	2	2	2	1	2	2	173	75	25.06	140	97	90	61	4.5	3.3	1.62	5.2	3.25	1.32	444	5.6	43.9	5.3	45.87	35.46	156.4	1	0	NA	0	0	0	0	0	0.15	0.29	8.65	4.41	15.8367	5.09117	22.4551	81	59.4
943	A	2	25	2	2	2	6	2	2	152	69	29.86	116	72	86	98	5.3	4.7	0.58	6.13	4.35	1.26	461	5.9	38.3	5.47	74.89	70.57	848	1	0	NA	0	0	0	0	0	0.08	0.09	13.69	12.02	4.17517	10.1321	121.752	95.4	84.6
944	A	1	27	1	2	2	7	3	3	172	85	28.73	123	90	93	100	5	5.1	1.88	5.61	3.38	1.38	489	5.9	69.7	40.84	48.18	206.3	629.9	1	0	NA	0	0	0	0	0	0.2	0.08	1.18	3.05	2.62197	29.6195	90.4379	90	91.8
945	A	2	54	1	2	2	2	2	2	162	65	24.77	122	68	88	83	8.2	9.1	1.51	6.1	3.79	1.57	315	7.1	39.2	9.35	122.27	54.59	262.8	0	1	NA	0	1	1	0	0	0.17	0.47	13.08	4.81	4.93623	7.83776	37.7315	147.6	163.8
946	A	1	62	2	2	2	1	3	3	172	76	25.69	168	89	93	75	5.4	9.5	2.49	7	4.73	1.35	630	5.8	49.6	9.27	15.03	49.6	729.8	1	0	NA	0	0	0	0	1	0.19	0.02	1.62	14.71	4.38801	7.12132	104.781	97.2	171
947	A	2	62	2	2	2	1	3	2	155	50	20.81	131	78	75	76	5.7	6.4	1.32	5.02	2.83	1.54	257	5.7	33.1	6.47	45.63	32.18	267.9	0	0	NA	0	0	0	0	0	0.2	0.17	7.05	8.33	9.48281	4.62024	38.4637	102.6	115.2
948	A	2	53	1	2	2	7	3	2	152	60	25.97	118	74	82	83	6.6	5.9	1.63	4.17	1.85	1.63	236	5.9	38.2	11.76	11.49	23.2	215.7	0	0	NA	0	0	0	1	0	0.51	0.05	0.98	9.3	11.4446	3.33094	30.9691	118.8	106.2
949	A	2	29	2	2	2	1	3	3	152	44	19.04	117	70	64	87	5.6	6.2	1.43	6.14	3.9	1.47	247	5.8	34.4	4.18	35.62	38.82	236.6	0	0	NA	0	0	0	0	0	0.11	0.15	8.52	6.09	9.207	5.57358	33.9698	100.8	111.6
950	A	1	28	2	2	2	7	3	3	166	67	24.31	110	74	85	70	4.8	5.1	2.89	5.3	3.15	1.3	385	5.5	28.8	13.58	102.49	61.22	608.5	0	0	NA	0	0	0	0	0	0.22	0.17	7.55	9.94	5.5443	8.78966	87.3654	86.4	91.8
951	A	1	34	2	2	2	7	3	3	172	70	23.66	126	91	84	86	4.8	7.2	1.56	4.2	2.43	1.14	413	5.7	48.3	5.83	15.49	44.22	452.1	0	0	NA	0	0	0	0	0	0.13	0.03	2.66	10.22	6.88299	6.34889	64.9103	86.4	129.6
952	A	2	31	2	2	2	7	3	3	153	62	26.49	123	80	79	87	5.6	13.6	3.84	5.7	3.17	1.12	465	5.7	25.7	5.47	92.55	76.19	2271	1	1	NA	0	0	0	0	0	0.07	0.04	16.92	29.81	1.76486	10.939	326.059	100.8	244.8
953	A	2	28	2	2	3	7	3	3	154	46	19.4	93	69	60	94	5.1	4.6	1.53	4.71	2.69	1.4	246	5.4	34.9	4.72	52.91	19.54	259.9	0	0	NA	0	0	0	0	0	0.24	0.2	11.21	13.3	14.8902	2.80546	37.3151	91.8	82.8
954	A	2	52	1	2	1	7	3	3	158	53	21.23	135	85	70	78	5.8	7.1	0.97	5.65	3.25	1.74	347	5.7	46.4	6.97	17.69	79.05	614.7	0	0	NA	0	0	0	0	0	0.09	0.03	2.54	7.78	3.82047	11.3496	88.2556	104.4	127.8
955	A	2	44	1	2	2	7	3	3	152	57	24.67	126	79	72	NA	5.6	7.7	2.52	4.73	2.66	1.27	437	6.3	29.2	11.16	12.89	96.74	588.1	1	0	NA	0	0	0	0	0	0.12	0.02	1.16	6.08	3.48386	13.8894	84.4365	100.8	138.6
957	A	2	29	2	2	3	7	3	3	158	48	19.23	94	65	66	87	4.3	3.9	1.58	6.11	3.24	1.97	286	5.2	30.5	11.85	84.39	35.51	256.6	0	0	NA	0	0	0	0	0	0.33	0.33	7.12	7.23	12.7964	5.09835	36.8413	77.4	70.2
958	A	2	36	1	1	2	1	1	1	160	58	22.66	116	71	82	79	6.6	9.9	0.88	4.38	2.24	1.49	433	6.1	31.2	14.78	47.52	53.27	825	1	0	NA	0	0	0	0	1	0.28	0.06	3.22	15.49	3.42854	7.64824	118.449	118.8	178.2
959	A	2	39	1	2	2	1	3	3	165	59	21.67	96	65	68	75	5.5	6.9	1.12	4.56	2.57	1.46	264	5.9	37.6	5.32	63.71	32.73	367.8	0	0	NA	0	0	0	0	0	0.16	0.17	11.98	11.24	8.18457	4.69921	52.8069	99	124.2
960	A	1	43	2	2	2	1	2	2	169	71	24.86	117	79	81	77	4.5	8.2	1.89	5.56	3.05	1.72	367	5.4	35.9	9.18	50.37	34.58	420.1	0	0	NA	0	0	0	0	1	0.27	0.12	5.49	12.15	8.16404	4.96482	60.3159	81	147.6
961	A	1	71	2	2	2	7	2	2	161	61	23.53	116	85	84	106	5.5	9.1	1.08	6.24	3.87	1.44	325	5.9	50.9	10.47	12.33	32.34	374.4	0	0	NA	0	0	0	0	1	0.32	0.03	1.18	11.58	7.52996	4.64322	53.7545	99	163.8
962	A	2	63	2	2	2	6	3	2	154	50	21.08	119	79	76	69	5.3	6.5	1.96	6.87	3.25	2.32	277	5.5	43.6	11.48	36.06	36.58	240.3	0	0	NA	0	0	0	0	0	0.31	0.15	3.14	6.57	9.72371	5.25197	34.5011	95.4	117
964	A	2	36	1	2	1	1	3	3	163	50	18.82	96	67	78	92	4.8	7.6	1.94	5.58	3.1	1.64	257	5.6	33.1	10.7	8.41	72.27	704.2	0	0	NA	0	0	0	0	0	0.15	0.01	0.79	9.74	4.23454	10.3762	101.106	86.4	136.8
965	A	2	60	2	2	2	7	3	3	156	60	24.65	106	60	83	92	6.5	8.7	1.73	5.5	3.31	1.38	359	5.7	32.7	17.67	11.9	43.41	302.4	0	0	NA	0	0	0	0	1	0.41	0.04	0.67	6.97	6.35457	6.23259	43.4171	117	156.6
966	A	2	53	1	2	2	6	2	2	153	58	24.78	119	70	81	93	8	17.7	3.3	6.57	3.34	1.68	352	7.2	37.6	6.74	100.21	105.8	730.4	0	1	NA	0	1	1	0	0	0.06	0.14	14.87	6.9	1.81455	15.1902	104.867	144	318.6
967	A	2	35	2	2	3	1	3	1	162	62	23.62	130	88	75	93	5.4	5.8	1.25	3.64	1.6	1.45	226	5.1	34.6	23.3	67.51	86.74	276.6	0	0	NA	0	0	0	0	0	0.27	0.24	2.9	3.19	5.6054	12.4537	39.7128	97.2	104.4
968	A	2	46	2	2	2	1	2	2	154	52	21.93	116	72	71	NA	5.6	5	1.64	4.32	2.14	1.45	153	6.1	34.5	9.13	14.7	28.59	116.7	0	0	NA	0	0	0	0	0	0.32	0.13	1.61	4.08	15.585	4.10481	16.7552	100.8	90
969	A	1	42	2	1	2	6	1	2	162	66	25.15	101	71	77	NA	6.1	7.5	1.66	3.74	1.65	1.52	413	6.4	69	14.26	23.36	45.01	172.2	1	0	NA	0	1	0	1	0	0.32	0.14	1.64	3.83	8.5931	6.46231	24.7236	109.8	135
970	A	2	31	2	2	2	1	2	2	149	36	16.22	96	65	59	85	5.1	6.5	1.67	5.84	3.01	1.97	194	5.3	26.9	9.16	12.59	23.49	211.6	0	0	NA	0	0	0	0	0	0.39	0.06	1.37	9.01	13.5396	3.37258	30.3805	91.8	117
971	A	2	64	2	2	1	7	1	1	152	59	25.54	140	86	80	73	5.4	7.4	1.99	8.83	5.54	1.96	505	6.1	44.2	8.45	10.97	72.51	378.2	1	0	NA	0	0	0	0	0	0.12	0.03	1.3	5.22	5.14907	10.4106	54.3001	97.2	133.2
972	A	2	36	1	2	2	1	2	2	159	55	21.76	100	65	70	81	5.7	8.2	1.63	8.5	5.81	1.8	234	5.5	30.1	10.21	20.71	61.57	489.3	0	0	NA	0	0	0	0	1	0.17	0.04	2.03	7.95	4.7209	8.83991	70.2513	102.6	147.6
973	A	2	45	2	2	2	7	3	1	153	51	21.79	102	71	71	89	4.9	7.6	1.43	4.7	2.36	1.6	317	5.6	32.1	13.83	144.59	66.01	813.5	0	0	NA	0	0	0	0	0	0.21	0.18	10.45	12.32	4.10393	9.47739	116.798	88.2	136.8
974	A	1	47	2	2	2	7	2	1	166	66	23.95	125	91	83	104	5.9	8.5	1.52	3.81	2.15	1.05	449	6.1	37.4	12.28	8.69	35.57	193.6	1	0	NA	0	0	0	0	1	0.35	0.04	0.71	5.44	9.29931	5.10696	27.7961	106.2	153
975	A	2	46	2	2	2	1	2	1	151	60	26.31	116	81	87	78	5.5	5.2	1.66	4.14	2.49	1.07	316	5.7	32.4	10.94	11.96	58.79	121.8	0	0	NA	0	0	0	0	0	0.19	0.1	1.09	2.07	9.79054	8.44078	17.4874	99	93.6
976	A	2	46	2	2	2	7	3	3	150	43	19.11	107	64	71	81	5.2	5.8	1.14	3.75	1.86	1.44	244	5.8	37.6	11.97	42.35	48.11	214.6	0	0	NA	0	0	0	0	0	0.25	0.2	3.54	4.46	9.10174	6.90739	30.8112	93.6	104.4
977	A	2	35	1	2	3	1	1	2	157	65	26.37	127	66	81	83	5.5	7.5	1.31	4.81	2.71	1.44	412	4.9	54.4	6.4	68.72	71.86	619	1	0	NA	0	0	0	0	0	0.09	0.11	10.74	8.61	4.10759	10.3173	88.8729	99	135
978	A	1	42	2	2	2	1	2	2	169	67	23.46	116	68	74	78	5.6	5.1	1.86	3.38	1.26	1.42	352	5.9	49.1	7.21	18.78	38.5	196.1	0	0	NA	0	0	0	0	0	0.19	0.1	2.6	5.09	10.5196	5.52764	28.1551	100.8	91.8
979	A	1	49	1	2	1	6	2	2	164	67	24.91	193	119	84	95	5.7	5.8	1.87	3.89	2.12	1.1	408	5.9	44.9	6.23	15.43	49.88	326.1	0	0	NA	0	0	0	0	0	0.12	0.05	2.48	6.54	6.97986	7.16152	46.8198	102.6	104.4
980	A	2	30	2	2	2	1	3	2	165	45	16.53	96	62	62	122	5.2	5.5	0.66	3.9	1.85	1.51	245	5.6	33.7	5.35	7.97	41.61	117.7	0	0	NA	0	0	0	0	0	0.13	0.07	1.49	2.83	12.7428	5.97416	16.8988	93.6	99
981	A	2	39	2	2	2	2	2	2	155	51	21.23	109	71	67	73	4.7	6.2	2.05	5.91	3.29	1.64	321	5.5	31	10.21	12.96	58.02	583.8	0	0	NA	0	0	0	0	0	0.18	0.02	1.27	10.06	5.603	8.33022	83.8191	84.6	111.6
982	A	2	36	2	2	2	7	3	3	150	43	19.11	107	71	61	88	4.6	5.5	1.43	4.74	2.16	1.84	266	5.4	36.5	9.19	7.28	38.64	143.9	0	0	NA	0	0	0	0	0	0.24	0.05	0.79	3.72	13.5189	5.54774	20.6604	82.8	99
983	A	1	43	2	2	3	7	3	3	169	67	23.46	140	93	83	92	5.4	6.3	3.99	7.05	3.37	1.8	477	5.9	58	4.83	44.8	25.03	217.4	1	0	NA	0	0	0	0	0	0.19	0.21	9.28	8.69	12.4987	3.59368	31.2132	97.2	113.4
984	A	2	62	2	2	2	1	2	2	162	55	20.96	132	74	75	88	6.3	9.1	1.77	3.89	1.84	1.44	200	6	39.5	5.4	11.64	39.8	274.3	0	0	NA	0	0	0	0	1	0.14	0.04	2.16	6.89	7.02704	5.71429	39.3826	113.4	163.8
985	A	1	64	2	2	2	2	2	2	172	69	23.32	140	91	83	93	5.1	9.1	2.19	4.78	2.52	1.42	428	5.5	38.2	11.21	90.83	32.5	494.8	1	0	NA	0	0	0	0	1	0.34	0.18	8.1	15.22	6.9467	4.66619	71.0409	91.8	163.8
987	A	2	36	2	2	2	7	3	3	148	47	21.46	121	76	70	81	5.3	9	1.71	4.23	2.18	1.36	226	5.3	41.3	5.64	10.69	33.42	408.8	0	0	NA	0	0	0	0	1	0.17	0.03	1.9	12.23	7.31224	4.79828	58.6935	95.4	162
988	A	2	44	1	2	2	1	2	2	167	68	24.38	101	66	79	NA	5	6.7	1.48	4.41	2.36	1.42	230	5.3	32.6	11.6	70.3	71.35	425.9	0	0	NA	0	0	0	0	0	0.16	0.17	6.06	5.97	5.37176	10.2441	61.1486	90	120.6
989	A	2	25	2	2	2	1	2	2	156	97	39.86	89	58	65	94	4.9	4.8	1.35	3.91	1.96	1.51	219	5.3	31.4	5.59	9.54	54.44	213	0	0	NA	0	0	0	0	0	0.1	0.04	1.71	3.91	9.30299	7.81622	30.5815	88.2	86.4
990	A	1	47	2	1	2	1	3	3	157	62	25.15	135	89	83	96	9	11.01	3.97	5.26	2.58	1.42	400	7.3	33.4	13.93	27.46	43.43	139	0	1	NA	1	1	1	0	0	0.32	0.2	1.97	3.2	6.47874	6.23546	19.9569	162	198.18
991	A	2	49	2	2	2	7	2	2	164	70	26.03	136	79	82	83	7.1	12.1	1.7	5.69	3.21	1.67	316	6.5	32.3	4.65	10.82	40.6	694.3	0	1	NA	0	1	0	0	0	0.11	0.02	2.33	17.1	3.83726	5.82915	99.6841	127.8	217.8
992	A	1	58	2	2	NA	6	3	3	163	100	37.64	143	84	116	88	5.7	7.8	1.8	4.13	2.31	1.13	607	5.7	56.2	6.21	60.71	94.47	594.5	1	0	NA	0	0	0	0	1	0.07	0.1	9.78	6.29	3.45802	13.5635	85.3553	102.6	140.4
993	A	2	44	2	2	2	1	2	2	156	63	25.89	130	70	95	NA	6.6	7.5	1.5	4.91	2.61	1.86	377	6.2	36.1	9.36	42.06	64.4	214.9	0	0	NA	0	0	0	1	0	0.15	0.2	4.49	3.34	5.98162	9.24623	30.8543	118.8	135
994	A	2	37	2	2	2	1	2	2	157	55	22.31	108	69	75	70	5.3	7.1	1.02	5.21	2.76	1.82	264	5.9	21.4	7.75	10.36	26.07	185.3	0	0	NA	0	0	0	0	0	0.3	0.06	1.34	7.11	12.8599	3.743	26.6045	95.4	127.8
996	A	2	56	2	2	2	6	3	3	158	59	23.63	128	71	77	88	5.6	14.2	3.44	4.99	2.34	1.32	415	6.1	35.7	6.93	11.99	63.82	770.3	0	1	NA	0	0	0	0	0	0.11	0.02	1.73	12.07	3.18537	9.16296	110.596	100.8	255.6
997	A	2	28	1	2	2	1	2	3	150	49	21.78	102	78	71	94	4.9	7.1	1.08	4.91	2.9	1.36	419	5.8	27.5	9.23	37.37	37.15	319.7	0	0	NA	0	0	0	0	0	0.25	0.12	4.05	8.61	8.76532	5.33381	45.9009	88.2	127.8
999	A	1	43	2	2	2	6	2	2	168	68	24.09	154	92	83	82	5.5	9	3.12	6.9	4.03	1.49	440	6.1	33.1	7.83	149.05	48.94	845	1	0	NA	0	0	0	0	1	0.16	0.18	19.04	17.27	4.14312	7.02656	121.321	99	162
1000	A	2	55	2	2	NA	7	3	3	154	50	21.08	118	106	73	82	5.1	7.2	0.59	3.62	2.1	1.04	363	4.6	36.8	7.37	44.98	46.28	1447	0	0	NA	0	0	0	0	0	0.16	0.03	6.1	31.27	3.71684	6.64465	207.753	91.8	129.6
1001	A	2	28	2	2	2	1	3	3	154	50	21.08	103	66	67	105	5	10	0.62	3.58	1.94	1.2	360	5.1	30.5	9.45	21.21	55.36	1379	0	0	NA	0	0	0	0	1	0.17	0.02	2.24	24.91	3.17118	7.94831	197.99	90	180
1002	A	2	55	1	1	2	1	3	3	156	72	29.59	143	83	96	85	6.4	15.5	1.65	4.54	2.2	1.52	151	8.1	25.4	40.01	41.72	279.2	364	0	1	NA	1	1	1	0	0	0.14	0.11	1.04	1.3	1.54254	40.0861	52.2613	115.2	279
1003	A	2	52	2	2	3	7	3	1	150	45	20	112	76	66	76	4.8	6.8	1.34	4.57	2.28	1.68	284	5.7	39.3	8.8	46.93	19.74	370.7	0	0	NA	0	0	0	0	0	0.45	0.13	5.33	18.78	11.8135	2.83417	53.2233	86.4	122.4
1004	A	1	34	1	2	NA	7	3	3	176	58	18.72	120	66	68	80	4.9	5.4	1.81	5.21	2.72	1.61	391	5.6	46.6	6.98	104.95	15.85	448.7	0	0	NA	0	0	0	0	0	0.44	0.23	15.04	28.31	12.695	2.27566	64.4221	88.2	97.2
1005	A	2	32	2	2	NA	7	3	3	159	67	26.5	107	72	83	93	4.8	6	1.25	5.37	2.92	1.83	326	5.3	32.2	7.04	11.86	45.78	249.7	0	0	NA	0	0	0	0	0	0.15	0.05	1.68	5.45	9.24154	6.57286	35.8507	86.4	108
1006	A	2	49	1	2	NA	7	3	3	154	60	25.3	129	79	87	62	4.6	7.11	1.46	4.49	2.64	1.14	346	5.2	34.4	12.44	20.75	90.42	840	0	0	NA	0	0	0	0	0	0.14	0.02	1.67	9.29	3.63538	12.9821	120.603	82.8	127.98
1007	A	1	49	1	2	NA	7	3	3	162	93	35.44	141	125	113	83	4.8	7.4	2.09	4.51	2.37	1.36	453	6	47.5	7.19	37.02	76.09	673.5	1	0	NA	0	0	0	0	0	0.09	0.05	5.15	8.85	4.2345	10.9246	96.6978	86.4	133.2
1008	A	2	37	1	2	2	7	3	2	149	52	23.42	109	76	70	NA	5.1	8	1.33	4.43	2.13	1.61	249	6	34	19.46	130.53	62.91	982.4	0	0	NA	0	0	0	0	1	0.31	0.13	6.71	15.62	3.69212	9.0323	141.048	91.8	144
1009	A	1	78	2	2	2	7	2	2	163	48	18.07	106	57	72	82	4.9	8.4	1.71	5.54	2.84	1.78	467	6	22.7	13.73	103.29	32.03	550.5	1	0	NA	0	0	0	0	1	0.43	0.19	7.52	17.19	7.01806	4.59871	79.038	88.2	151.2
1010	A	1	46	2	2	2	1	2	2	174	61	20.15	127	74	76	89	5.4	13.6	1.97	4.79	2.56	1.51	339	6.1	27.2	8.85	48.34	94.9	2191	0	1	NA	0	0	0	0	0	0.09	0.02	5.46	23.09	1.64038	13.6253	314.573	97.2	244.8
1012	A	1	49	2	2	2	1	2	2	155	74	30.8	130	72	100	NA	5.2	7.5	1.75	5.45	2.73	1.8	375	6.1	46.1	11.24	353.59	138.2	300.8	0	0	NA	0	0	0	0	0	0.08	1.18	31.46	2.18	3.86624	19.8421	43.1874	93.6	135
1013	A	1	34	2	2	2	7	2	2	172	70	23.66	112	66	84	74	4.9	5.6	0.47	4.73	2.91	1.25	427	5.5	40.1	13.78	12.45	53.96	627.3	1	0	NA	0	0	0	0	0	0.26	0.02	0.9	11.63	5.62721	7.74731	90.0646	88.2	100.8
1015	A	2	39	2	2	2	7	3	3	162	53	20.2	107	68	74	67	5	5.7	0.65	4.43	2.53	1.29	242	5.1	32.9	10.14	52.18	23.7	196.1	0	0	NA	0	0	0	0	0	0.43	0.27	5.15	8.27	14.6593	3.40273	28.1551	90	102.6
1016	A	2	21	2	2	2	1	3	2	164	58	21.56	98	63	72	76	4.5	6.4	1.19	4.38	2.34	1.54	322	5.2	38.1	9.58	51.69	54.61	235.3	0	0	NA	0	0	0	0	0	0.18	0.22	5.4	4.31	8.78196	7.84063	33.7832	81	115.2
1017	A	2	60	2	2	2	6	3	1	155	60	24.97	97	68	86	94	6.5	13	0.76	5.49	3.2	1.55	298	7	44.4	16.09	346.99	84	2016	0	1	NA	0	1	1	0	0	0.19	0.17	21.57	24	1.63665	12.0603	289.447	117	234
1018	A	2	28	2	2	2	1	2	2	165	57	20.94	96	67	66	NA	5.5	7.5	1.22	4.35	2.43	1.41	348	6.1	32.8	5.61	56.55	29.35	344.1	0	0	NA	0	0	0	0	0	0.19	0.16	10.08	11.72	8.74189	4.21393	49.4042	99	135
1019	A	1	37	2	2	2	1	2	2	171	57	19.49	110	79	75	95	4.4	4.6	0.91	5.7	3.29	1.62	397	7.8	51.4	8.82	19.61	13.81	98.13	0	0	NA	0	1	1	0	0	0.64	0.2	2.22	7.11	31.2782	1.98277	14.089	79.2	82.8
1021	A	1	58	2	2	2	1	1	2	161	67	25.85	144	55	85	78	6.9	14.7	1.69	6.1	3.88	1.24	330	7	53.4	18.94	55.67	55.95	881.1	1	1	NA	0	1	1	0	0	0.34	0.06	2.94	15.75	2.76851	8.03302	126.504	124.2	264.6
1022	A	1	47	2	2	2	1	1	3	165	59	21.67	113	73	81	NA	5.1	7.1	2.08	4.17	2.38	1.25	431	5.2	63.8	4.31	15.53	51.15	394	1	0	NA	0	0	0	0	0	0.08	0.04	3.6	7.7	6.50186	7.34386	56.5686	91.8	127.8
1023	A	1	58	2	2	2	1	3	3	163	63	23.71	117	69	89	NA	4.3	5.5	2.08	4.53	2.53	1.28	366	5.9	64.5	12.67	53.17	31.47	136	0	0	NA	0	0	0	0	0	0.4	0.39	4.2	4.32	16.4216	4.51831	19.5262	77.4	99
1024	A	1	41	1	2	2	1	2	2	163	74	27.85	121	85	86	85	4.6	5.9	1.69	5.27	3.01	1.63	443	4.3	45.5	12.32	11.21	39.63	159.2	1	0	NA	0	0	0	0	0	0.31	0.07	0.91	4.02	12.5445	5.68988	22.8571	82.8	106.2
1025	A	1	68	2	2	2	1	3	2	174	69	22.79	118	83	85	82	5.8	8.3	0.61	4.44	2.52	1.46	518	5.8	50.4	7.44	19.19	69.24	770	1	0	NA	0	0	0	0	1	0.11	0.02	2.58	11.12	3.55004	9.94113	110.553	104.4	149.4
1026	A	2	39	2	2	2	7	3	3	156	53	21.78	121	81	80	92	4.7	6.9	1.51	4.19	2.3	1.3	337	5.3	44.3	6.13	103.77	49.51	519.5	0	0	NA	0	0	0	0	0	0.12	0.2	16.93	10.49	6.24445	7.1084	74.5872	84.6	124.2
1027	A	2	44	2	2	2	1	2	2	153	70	29.9	110	61	90	66	4.8	7.3	1.61	5.2	2.73	1.7	297	6.3	29.9	8.63	17.85	16.35	114.2	0	0	NA	0	0	0	0	0	0.53	0.16	2.07	6.98	21.9795	2.34745	16.3963	86.4	131.4
1030	A	1	36	1	2	3	1	3	1	162	63	24.01	117	81	74	81	4.9	4.8	1.97	6.44	3.81	1.7	475	5.5	33.5	9.81	144.57	39.28	200.2	1	0	NA	0	0	0	0	0	0.25	0.72	14.74	5.1	11.5738	5.63963	28.7437	88.2	86.4
1031	A	2	40	2	2	2	1	3	3	161	64	24.69	111	81	82	82	5.3	6	1.05	4.79	2.98	1.18	348	5.9	43.7	6.35	11.71	47.29	283	0	0	NA	0	0	0	0	0	0.13	0.04	1.84	5.98	8.00146	6.78966	40.6317	95.4	108
1032	A	2	68	2	2	2	7	3	3	140	43	21.94	118	71	75	74	5.4	9.8	3.31	5.19	2.68	1.36	257	6.2	54.8	6.03	33.23	31.53	597.4	0	0	NA	0	0	0	0	1	0.19	0.06	5.51	18.95	6.06592	4.52692	85.7717	97.2	176.4
1033	A	1	69	2	2	2	7	3	3	162	60	22.86	99	65	80	68	6.4	13.1	1.09	5.01	3.4	1.4	489	5.8	41.6	12.05	401.37	109.8	1590	1	1	NA	0	0	0	0	0	0.11	0.25	33.31	14.48	1.60351	15.7645	228.284	115.2	235.8
1034	A	1	29	2	2	2	7	3	2	169	72	25.21	114	77	87	107	4.9	7.8	2.7	5.13	2.91	1.22	455	5.7	54.5	7.53	11.52	88.22	729.1	1	0	NA	0	0	0	0	1	0.09	0.02	1.53	8.26	3.65342	12.6662	104.681	88.2	140.4
1035	A	1	53	2	2	1	1	2	2	163	68	25.59	141	98	94	90	4.6	5.9	5.1	5.3	3.07	1.51	478	5.9	NA	12.22	67.98	39.82	208.5	1	0	NA	0	0	0	0	0	0.31	0.33	5.56	5.24	11.1982	5.71716	29.9354	82.8	106.2
1036	A	1	30	2	2	3	7	3	2	155	62	25.81	112	77	82	82	5.3	6.2	1.4	5.02	3.04	1.44	345	5.5	32.5	12.4	24.81	56.84	218	0	0	NA	0	0	0	0	0	0.22	0.11	2	3.84	7.93094	8.1608	31.2994	95.4	111.6
1037	A	2	58	2	2	2	1	3	3	159	54	21.36	116	74	78	93	5.4	9.2	16.7	4.34	0.73	0.6	420	6.4	36.1	16.16	82.74	36.23	1155	0	0	NA	0	1	0	0	1	0.45	0.07	5.12	31.88	4.1954	5.20172	165.829	97.2	165.6
1038	A	2	39	2	2	2	6	2	2	159	56	22.15	107	69	75	86	5.6	8.7	5.42	4.61	1.61	1.19	367	6.2	36.2	5.79	56.46	27.26	1825	0	0	NA	0	0	0	0	1	0.21	0.03	9.75	66.95	3.8486	3.91385	262.024	100.8	156.6
1039	A	2	61	2	2	2	6	2	2	158	69	27.64	119	64	86	77	6.1	11.4	1.63	5.25	2.9	1.53	510	6.1	25.3	8.88	93.97	83.88	1130	1	1	NA	0	0	0	0	0	0.11	0.08	10.58	13.47	2.34735	12.0431	162.24	109.8	205.2
1040	A	2	48	2	2	3	2	3	2	149	56	25.22	139	100	75	80	4.6	7.6	1.59	6.41	2.97	2.25	400	5.2	50.3	6.71	62.32	25.42	336.7	0	0	NA	0	0	0	0	0	0.26	0.19	9.29	13.25	10.7673	3.64968	48.3417	82.8	136.8
1041	A	2	76	2	2	1	6	3	1	153	64	27.34	171	84	95	92	5.6	8.2	2.82	6.12	3.3	1.6	469	6.1	27.4	8.32	139.5	197.2	1669	1	0	NA	0	0	0	0	1	0.04	0.08	16.77	8.46	1.45115	28.313	239.627	100.8	147.6
1042	A	2	62	2	2	2	6	2	2	157	67	27.18	121	81	83	NA	6.3	11.3	3.92	5.74	2.62	1.59	509	6.6	36.9	6.92	33.3	56.82	462.5	1	1	NA	0	1	1	0	0	0.12	0.07	4.81	8.14	4.27842	8.15793	66.4034	113.4	203.4
1043	A	1	35	1	2	3	6	3	3	165	60	22.04	124	82	85	84	5	7.4	1.05	6.15	3.69	1.56	444	5.6	48.5	9.7	15.46	56.23	396.8	1	0	NA	0	0	0	0	0	0.17	0.04	1.59	7.06	6.15794	8.07322	56.9706	90	133.2
1045	A	1	63	2	2	2	234	2	2	162	62	23.62	132	71	84	54	5.8	13.7	2.1	6.69	4.44	1.31	419	6.5	52	5.18	8.2	16.3	183.3	0	1	NA	0	1	0	0	0	0.32	0.04	1.58	11.25	12.7577	2.34027	26.3173	104.4	246.6
1046	A	2	68	2	2	2	6	2	3	149	52	23.42	125	73	81	81	6	10.1	1.96	6.61	4.24	1.41	345	7.1	57.4	6.97	7.16	22.68	63.36	0	0	NA	0	1	1	0	1	0.31	0.11	1.03	2.79	17.8245	3.25628	9.09691	108	181.8
1048	A	2	62	2	2	3	7	3	3	156	63	25.89	136	85	92	87	5.2	8.1	2.44	6.52	4.3	1.23	331	6.8	33.7	5.97	36.57	21.4	294.8	0	0	NA	0	1	1	0	1	0.28	0.12	6.13	13.78	11.3126	3.07251	42.3259	93.6	145.8
1049	A	2	45	2	2	NA	7	3	3	157	56	22.72	101	54	75	NA	5	6.2	2.2	5.43	3.16	1.37	283	5.6	42.6	4.8	7.97	36.84	208.4	0	0	NA	0	0	0	0	0	0.13	0.04	1.66	5.66	10.88	5.2893	29.921	90	111.6
1050	A	2	46	2	2	NA	7	3	3	159	62	24.52	107	61	80	71	5.1	5.1	1.54	6.29	3.2	1.44	327	6.8	43.6	5.46	107.31	25.47	579.9	0	0	NA	0	1	1	0	0	0.21	0.19	19.65	22.77	8.64109	3.65686	83.2592	91.8	91.8
1051	A	2	52	2	2	2	1	2	2	164	62	23.05	106	64	80	83	5.4	8.8	3.97	4.88	2.39	1.19	358	5.7	32.7	6.33	12.96	44.31	1266	0	0	NA	0	0	0	0	1	0.14	0.01	2.05	28.57	3.66775	6.36181	181.766	97.2	158.4
1052	A	1	46	2	2	1	7	3	3	168	80	28.34	161	104	95	77	6.1	7.6	4.4	4.04	1.82	1.02	495	6.3	40.8	9.37	13.65	47.41	242.1	1	0	NA	0	0	0	1	0	0.2	0.06	1.46	5.11	7.22581	6.80689	34.7595	109.8	136.8
1053	A	2	27	2	2	2	1	3	3	157	47	19.07	109	63	67	79	4.6	6.3	1.67	4.27	2.18	1.35	528	5.4	43.9	6.41	14.35	8.39	105.9	1	0	NA	0	0	0	0	0	0.76	0.14	2.24	12.62	35.294	1.20459	15.2046	82.8	113.4
1054	A	2	25	2	2	2	1	2	2	154	47	19.82	98	66	72	80	4.8	5.7	1.45	4.46	2.52	1.37	240	5.4	28.9	8.8	10.15	161.1	312.7	0	0	NA	0	0	0	0	0	0.05	0.03	1.15	1.94	3.94565	23.1299	44.8959	86.4	102.6
1055	A	2	24	2	2	2	1	2	2	158	49	19.63	114	71	71	71	4.6	4.3	1.41	3.57	1.84	1.14	282	5.5	26	5.13	8.27	65.07	108.3	0	0	NA	0	0	0	0	0	0.08	0.08	1.61	1.66	11.3875	9.34243	15.5492	82.8	77.4
1056	A	1	45	1	1	2	6	1	2	163	71	26.72	126	80	57	90	5.1	5	1.6	4	2.86	1.4	431	5.7	37.1	5.68	10.48	58.14	202.7	1	0	NA	0	0	0	0	0	0.1	0.05	1.85	3.49	8.75605	8.34745	29.1027	91.8	90
1057	A	2	23	1	2	2	1	2	2	159	72	28.48	111	64	88	85	5.2	8.1	3.08	5.51	3.4	1.16	413	6	36.4	5.22	10.45	140.8	467.5	0	0	NA	0	0	0	0	1	0.04	0.02	2	3.32	3.17973	20.2154	67.1213	93.6	145.8
1058	A	1	55	2	2	2	1	1	2	172	74	25.01	126	95	95	89	5	9.6	2.7	5.05	2.78	1.35	550	6.6	70	6.72	213.9	50.63	1093	1	0	NA	0	1	1	0	1	0.13	0.2	31.83	21.59	3.76418	7.2692	156.927	90	172.8
1059	A	2	47	2	2	2	7	2	2	153	44	18.8	90	75	66	NA	5.5	6.4	3.32	5.27	2.85	1.18	261	5.9	42.5	6.86	9.2	9.28	95.05	0	0	NA	0	0	0	0	0	0.74	0.1	1.34	10.24	30.7429	1.33238	13.6468	99	115.2
1060	A	1	33	1	2	2	1	1	2	169	64	22.41	132	79	82	77	4.7	7.2	2.73	4.81	2.82	1.08	452	5.9	49.6	6.08	8.17	8.22	97.91	1	0	NA	0	0	0	0	0	0.74	0.08	1.34	11.91	35.0349	1.18019	14.0574	84.6	129.6
1061	A	2	30	2	2	2	1	2	2	152	47	20.34	105	70	68	73	5.3	6.7	1.18	4.2	1.88	1.6	252	5.9	36.3	5.33	10.53	36.56	157.6	0	0	NA	0	0	0	0	0	0.15	0.07	1.98	4.31	11.5177	5.2491	22.6274	95.4	120.6
1062	A	2	37	2	1	2	7	2	2	163	63	23.71	115	83	85	102	4.2	9.8	3.47	7.16	3.85	1.84	216	5.2	30.8	6.27	5.43	71.49	302.3	0	0	NA	0	0	0	0	1	0.09	0.02	0.87	4.23	6.17381	10.2642	43.4027	75.6	176.4
1063	A	1	39	2	2	2	1	2	2	170	66	22.84	118	82	82	77	4.7	7.8	1.94	3.61	1.88	0.95	304	5.5	70	5.36	10.43	6.74	81.7	0	0	NA	0	0	0	0	1	0.8	0.13	1.95	12.12	41.3543	0.967696	11.7301	84.6	140.4
1064	A	1	27	1	2	3	7	3	3	173	87	29.07	131	83	102	90	5.2	8.7	4.21	6.32	3.81	1.02	521	5.6	32.2	7.33	9.38	166.5	1583	1	0	NA	0	0	0	0	1	0.04	0.01	1.28	9.51	1.68657	23.9052	227.279	93.6	156.6
1065	A	1	53	1	1	2	3	2	2	171	72	24.62	130	79	96	80	6.1	8	3.89	3.68	1.54	1.02	351	6.8	36.2	6.25	9.69	22.77	147.1	0	1	NA	1	1	1	0	0	0.27	0.07	1.55	6.46	13.4173	3.2692	21.1199	109.8	144
1066	A	2	31	2	2	2	7	2	2	152	47	20.34	125	75	77	100	4.7	7.8	1.47	4.24	2.23	1.3	319	5.5	34.4	6.28	11.56	28.73	521.6	0	0	NA	0	0	0	0	1	0.22	0.02	1.84	18.16	8.02963	4.12491	74.8887	84.6	140.4
1067	A	2	43	NA	2	2	1	2	2	142	54	26.78	93	61	81	94	4.6	5.9	2.09	5.32	3	1.33	302	5.6	30.5	8.47	11.67	40.08	332.2	0	0	NA	0	0	0	0	0	0.21	0.04	1.38	8.29	9.11604	5.75449	47.6956	82.8	106.2
1068	A	1	27	1	2	2	7	3	3	166	81	29.39	134	88	95	69	5.3	7.3	2.24	4.9	3.13	1.02	626	5.9	70	6.76	13.99	86.12	704.3	1	0	NA	0	0	0	0	0	0.08	0.02	2.07	8.18	3.62973	12.3647	101.12	95.4	131.4
1069	A	2	38	2	2	2	1	2	2	156	55	22.6	104	73	81	86	5.7	10.6	1.59	4.13	2.17	1.29	433	5.5	33.2	5.49	32.32	37.86	472.2	1	0	NA	0	0	0	0	1	0.15	0.07	5.89	12.47	5.77759	5.43575	67.7961	102.6	190.8
1070	A	2	39	1	1	2	1	2	2	150	62	27.56	123	83	86	87	6.3	15.2	4.13	5.21	2.6	1.14	446	7	36.5	12.64	12.06	118.7	774.4	1	1	NA	0	1	1	0	0	0.11	0.02	0.95	6.52	2.04227	17.0424	111.184	113.4	273.6
1071	A	1	67	2	2	2	7	2	2	162	67	25.53	119	63	94	67	7.2	12.1	3.36	5.93	3.65	1.04	498	6.6	22	8.8	11.41	99.47	501.4	1	1	NA	0	1	1	0	0	0.09	0.02	1.3	5.04	2.68533	14.2814	71.9885	129.6	217.8
1072	A	2	42	2	2	2	7	3	3	151	56	24.56	115	86	80	86	5.4	7.2	2.3	4.71	2.5	1.24	360	6.3	27.4	21.46	12.84	59.85	459.4	0	0	NA	0	0	0	0	0	0.36	0.03	0.6	7.68	5.32202	8.59296	65.9584	97.2	129.6
1073	A	2	37	2	2	2	2	2	2	159	63	24.92	107	76	84	86	5	6.2	1.98	6.76	4.38	1.48	362	5.8	40.7	9.44	6.81	12.98	45.32	0	0	NA	0	0	0	0	0	0.73	0.15	0.72	3.49	37.5935	1.8636	6.50682	90	111.6
1074	A	2	62	2	2	2	7	3	3	144	46	22.18	119	66	75	80	5.4	11	2.46	4.41	2.07	1.33	215	6.4	20.4	7.81	8.11	41.9	301.4	0	0	NA	0	1	0	0	1	0.19	0.03	1.04	7.19	6.85671	6.01579	43.2735	97.2	198
1075	A	2	54	1	1	2	1	3	2	154	57	24.03	134	111	84	86	5	9.8	1.71	4.88	2.24	1.7	238	7.2	26.3	9.3	8.41	34.42	84	0	1	NA	1	1	1	0	0	0.27	0.1	0.9	2.44	14.0911	4.94185	12.0603	90	176.4
1076	A	2	51	2	1	2	1	2	2	154	45	18.97	117	78	68	87	10.8	20.3	1.45	4.35	2.19	1.44	188	8.5	48.7	5.88	5.62	13.3	13.46	0	1	NA	0	1	1	0	0	0.44	0.42	0.96	1.01	22.383	1.90955	1.93252	194.4	365.4
1077	A	1	57	1	1	2	2	2	1	174	83	27.41	113	67	101	67	6.3	10.2	1.31	5.04	2.71	1.52	465	6.7	70	7.35	15.59	23.25	236.6	1	0	NA	0	1	1	0	1	0.32	0.07	2.12	10.18	9.76548	3.33812	33.9698	113.4	183.6
1078	A	2	48	2	2	2	7	2	2	164	65	24.17	95	69	82	NA	5	5.7	1.7	4.54	2.11	1.62	173	5.3	31.2	5.84	10.42	5.02	126.7	0	0	NA	0	0	0	0	0	1.16	0.08	1.78	25.24	41.1457	0.720747	18.191	90	102.6
1079	A	1	45	2	2	2	7	3	2	161	45	17.36	97	61	64	NA	5.4	4.7	1.39	4.27	2.39	1.16	394	5.8	70	5.51	6.05	11.82	20	0	0	NA	0	0	0	0	0	0.47	0.3	1.1	1.69	54.0334	1.69706	2.8715	97.2	84.6
1080	A	1	49	2	2	2	7	2	2	169	69	24.16	130	74	79	NA	5.6	8.3	1.67	4.5	2.16	1.57	439	5.4	59.1	5.24	51.05	2.91	162.1	1	0	NA	0	0	0	0	1	1.8	0.31	9.74	55.7	40.0291	0.417803	23.2735	100.8	149.4
1081	A	2	34	2	2	2	7	3	3	164	56	20.82	107	68	73	84	5.2	4.9	1.18	4.72	2.42	1.54	266	5.8	34.7	4.76	8.23	1.39	25.9	0	0	NA	0	0	0	0	0	3.42	0.32	1.73	18.63	173.383	0.199569	3.71859	93.6	88.2
1082	A	2	43	2	2	2	6	2	2	150	55	24.44	112	67	78	NA	4.9	5.4	1.97	5.67	3.4	1.42	350	5.7	33.9	6.5	8.16	16.05	96.72	0	0	NA	0	0	0	0	0	0.4	0.08	1.26	6.03	25.6052	2.30438	13.8866	88.2	97.2
1083	A	2	63	2	2	1	1	3	2	146	53	24.86	160	85	83	106	5.5	7.8	1.86	6	3.8	1.31	289	6.2	42.9	6.53	125.91	33.12	1015	0	0	NA	0	0	0	0	1	0.2	0.12	19.28	30.65	4.85647	4.7552	145.729	99	140.4
1084	A	2	24	2	2	2	1	2	2	146	46	21.58	98	61	78	NA	5.3	8.3	2.23	5.04	2.77	1.36	313	5.7	21.4	6.28	71.54	86.09	795.8	0	0	NA	0	0	0	0	1	0.07	0.09	11.39	9.24	3.30817	12.3604	114.257	95.4	149.4
1085	A	2	43	2	2	2	1	3	2	156	55	22.6	96	63	77	75	5.4	6.5	2.55	4.85	2.73	1.2	304	6.1	46.4	5.75	7.71	13.39	110.9	0	0	NA	0	0	0	0	0	0.43	0.07	1.34	8.28	23.6646	1.92247	15.9225	97.2	117
1086	A	1	77	2	2	2	1	2	2	165	66	24.24	138	83	89	76	5.1	6.9	2.07	5.92	3.47	1.4	326	6.2	44.4	5.57	12.51	5.8	199.8	0	0	NA	0	0	0	0	0	0.96	0.06	2.25	34.45	28.6469	0.832735	28.6863	91.8	124.2
1087	A	2	70	1	1	2	7	3	3	146	49	22.99	116	69	82	115	10	10.4	2.25	4.55	2.45	1.1	431	7.6	33.6	5.72	6.79	30.11	76.07	1	1	NA	0	1	1	0	0	0.19	0.09	1.19	2.53	9.58268	4.32304	10.9218	180	187.2
1088	A	1	63	2	2	2	1	2	2	160	69	26.95	165	85	90	72	6.4	12.6	2.88	4.67	2.32	1.08	392	6.4	36.1	7.1	10.1	38.95	330.6	0	1	NA	0	1	0	0	0	0.18	0.03	1.42	8.49	5.84954	5.59225	47.4659	115.2	226.8
1089	A	2	29	2	2	2	1	2	2	167	52	18.65	106	68	69	81	4.7	6.5	1.09	4.47	2.61	1.23	360	5.4	37	7.5	19.08	22.57	180.5	0	0	NA	0	0	0	0	0	0.33	0.11	2.54	8	15.7555	3.24049	25.9153	84.6	117
1090	A	1	46	2	2	1	23	2	2	161	65	25.08	135	85	85	53	4.9	7.4	1.44	5.79	3.52	1.4	495	5.9	41.6	5.67	11.83	37.64	353.8	1	0	NA	0	0	0	0	0	0.15	0.03	2.09	9.4	8.21241	5.40416	50.7968	88.2	133.2
1091	A	2	42	2	2	2	1	2	2	167	68	24.38	148	96	84	78	5.5	6.7	0.89	5.42	3.24	1.36	315	6.1	43.1	5.91	8.35	12.31	158.5	0	0	NA	0	0	0	0	0	0.48	0.05	1.41	12.88	20.6031	1.76741	22.7566	99	120.6
1092	A	1	40	2	2	2	7	3	3	181	79	24.11	131	82	88	91	5.8	5.7	2.92	5.31	2.5	1.39	408	5.1	50.1	6.82	73.93	45.91	169.5	0	0	NA	0	0	0	0	0	0.15	0.44	10.84	3.69	9.5286	6.59153	24.336	104.4	102.6
1093	A	2	48	2	1	2	6	2	2	159	63	24.92	142	116	87	NA	10.7	18	4.89	9.84	6	1.39	377	8.3	26.7	5.63	9.49	55.28	208.9	0	1	NA	0	1	1	0	0	0.1	0.05	1.69	3.78	3.65436	7.93683	29.9928	192.6	324
1094	A	2	57	2	2	2	1	2	2	164	59	21.94	138	85	78	86	5.5	6	7.6	6.22	3.81	1.2	365	6.2	35.8	6.33	59.07	42.16	362.7	0	0	NA	0	0	0	0	0	0.15	0.16	9.33	8.6	7.4481	6.05312	52.0747	99	108
1095	A	2	78	1	2	3	7	1	1	127	38	23.56	116	71	80	92	5.9	8.3	2.07	5.24	3.05	1.29	292	6	38.5	16.61	92.99	3.03	53.1	1	0	NA	0	0	0	0	1	5.48	1.75	5.6	17.52	64.832	0.435032	7.62383	106.2	149.4
1096	A	1	57	2	2	2	1	2	2	159	59	23.34	113	75	84	63	6	9.8	3.71	7.32	3.87	1.46	502	6.9	52.5	8.23	76.14	54.13	977.9	1	0	NA	0	1	1	0	1	0.15	0.08	9.25	18.07	3.36286	7.77172	140.402	108	176.4
1097	A	2	21	2	2	2	1	2	2	156	41	16.85	106	70	58	101	5	5.6	1.31	5.42	2.38	2.25	290	5.3	33.8	6.78	10.48	29.38	207.8	0	0	NA	0	0	0	0	0	0.23	0.05	1.55	7.07	12.7343	4.21823	29.8349	90	100.8
1099	A	1	33	2	2	2	2	2	2	169	82	28.71	136	81	92	69	5.1	6.9	3.92	5.31	2.81	1.19	461	5.6	41.7	2.34	8.64	63.16	900.3	1	0	NA	0	0	0	0	0	0.04	0.01	3.69	14.25	4.01019	9.0682	129.261	91.8	124.2
1101	A	2	26	1	2	2	1	3	2	150	48	21.33	110	60	66	NA	4.7	5.5	1.52	4.76	2.49	1.58	325	5.5	31	2.24	2.83	13.98	137.7	0	0	NA	0	0	0	0	0	0.16	0.02	1.26	9.85	24.2724	2.00718	19.7703	84.6	99
1102	A	2	71	2	1	1	1	2	2	146	58	27.21	131	66	92	NA	6.5	10.1	1.5	4.18	2.14	1.3	320	6.7	30	2.1	12.79	30.08	302.6	0	0	NA	0	1	1	0	1	0.07	0.04	6.09	10.06	7.44759	4.31874	43.4458	117	181.8
1103	A	1	67	2	2	2	6	3	2	167	67	24.02	128	86	85	96	9.9	8	2.49	5.74	3.67	1.03	375	5.9	33.3	1.61	9.19	38.32	259.1	0	1	NA	0	0	0	0	0	0.04	0.04	5.71	6.76	5.44549	5.50179	37.2003	178.2	144
1104	A	1	34	2	2	1	23	2	2	168	80	28.34	141	93	92	86	5.4	7.7	4.65	5.98	2.91	1.18	432	5.9	34.5	1.83	5.79	90.16	337.4	1	0	NA	0	0	0	0	0	0.02	0.02	3.16	3.74	4.68641	12.9447	48.4422	97.2	138.6
1105	A	2	67	2	2	1	3	2	2	159	50	19.78	148	86	63	76	5.2	5.6	1.83	7.52	4.61	1.72	297	5.9	45.5	2.63	3.36	27.97	57.42	0	0	NA	0	0	0	0	0	0.09	0.06	1.28	2.05	21.1308	4.01579	8.24408	93.6	100.8
1106	A	2	21	2	2	2	1	2	2	152	44	19.04	109	76	59	94	5.1	5.1	1.69	5.32	2.75	1.68	265	6.1	44.9	5.33	17.3	46.02	499.9	0	0	NA	0	0	0	0	0	0.12	0.03	3.25	10.86	6.76948	6.60732	71.7732	91.8	91.8
1108	A	2	33	2	2	2	1	2	2	162	52	19.81	103	64	69	69	5.4	6.4	1.31	3.54	1.49	1.42	315	6	61.5	1.45	5.64	8.36	87.96	0	0	NA	0	0	0	0	0	0.17	0.06	3.89	10.52	34.1648	1.20029	12.6289	97.2	115.2
1109	A	2	48	2	2	2	7	3	3	158	51	20.43	98	59	69	78	5.3	5.9	1.68	5.25	2.62	1.69	273	5.4	42	1.91	3.3	23.13	93.07	0	0	NA	0	0	0	0	0	0.08	0.04	1.73	4.02	19.375	3.32089	13.3625	95.4	106.2
1110	A	2	51	2	2	2	7	3	3	156	62	25.48	114	77	84	99	5.5	7.3	1.78	5.95	3.34	1.58	234	5.6	38.1	1.27	4.16	49.3	121.6	0	0	NA	0	0	0	0	0	0.03	0.03	3.28	2.47	10.0484	7.07825	17.4587	99	131.4
1111	A	2	37	2	2	2	7	3	3	152	50	21.64	128	82	72	82	4.9	6.2	1.53	5.9	3.37	1.77	286	5.6	22.2	1.77	5.48	8.77	16.5	0	0	NA	0	0	0	0	0	0.2	0.33	3.1	1.88	70.4882	1.25915	2.36899	88.2	111.6
1112	A	2	44	2	2	2	7	2	3	145	40	19.02	107	62	60	84	4.3	4.8	1.72	5.04	2.29	1.77	287	5.3	34.4	2.36	2.79	3.74	17.89	0	0	NA	0	0	0	0	0	0.63	0.16	1.18	4.78	137.55	0.536971	2.56856	77.4	86.4
1113	A	2	52	2	2	2	7	3	2	149	43	19.37	114	73	67	78	4.4	3.8	1.53	5.41	2.63	1.78	277	5.4	44.4	1.91	1.99	15.17	33.35	0	0	NA	0	0	0	0	0	0.13	0.06	1.04	2.2	47.4889	2.17803	4.78823	79.2	68.4
1114	A	2	56	2	2	2	7	3	3	157	52	21.1	125	63	75	NA	5.2	4.1	1.61	6.09	3.4	1.47	294	5.9	45.5	2.19	2.15	18.17	11.95	0	0	NA	0	0	0	0	0	0.12	0.18	0.98	0.66	47.5697	2.60876	1.71572	93.6	73.8
1115	A	2	55	2	2	2	7	3	1	160	61	23.83	147	72	87	82	5.1	9.4	1.93	5.55	3.6	1.25	377	5.8	14	2.17	6.26	18.86	687.8	0	0	NA	0	0	0	0	1	0.12	0.01	2.88	36.47	7.79531	2.70782	98.7509	91.8	169.2
1116	A	1	58	2	2	2	1	3	2	170	81	28.03	139	92	100	93	4.8	10.3	2.1	5.1	3.05	1.21	589	6.2	50.1	1.82	5.28	47.12	707.8	1	0	NA	0	0	0	0	1	0.04	0.01	2.9	15.02	4.81966	6.76525	101.622	86.4	185.4
1117	A	1	75	2	2	2	1	3	2	175	62	20.24	122	70	78	80	6.3	9.7	1.39	5.26	2.82	1.52	318	6.5	58.1	2.24	6.85	14.69	292.9	0	0	NA	0	1	0	0	1	0.15	0.02	3.06	19.94	11.467	2.10912	42.0531	113.4	174.6
1118	A	2	28	2	2	2	7	2	1	152	63	27.27	123	81	81	76	5.7	10.4	2.3	4.12	2.26	1.8	302	5.5	38	2.39	4.18	48.43	464.1	0	0	NA	0	0	0	0	1	0.05	0.01	1.75	9.58	5.12757	6.95334	66.6332	102.6	187.2
1119	A	2	55	2	2	2	7	3	3	160	58	22.66	129	82	77	84	5.3	5.1	2.44	7.35	4.61	1.41	395	5.9	43.1	2.04	6.29	21.27	217.3	0	0	NA	0	0	0	0	0	0.1	0.03	3.08	10.22	14.633	3.05384	31.1989	95.4	91.8
1120	A	2	55	1	2	2	6	2	2	148	54	24.65	133	75	80	NA	7.5	10.3	1.65	7.37	4.72	1.64	301	7.1	33.1	1.27	3.3	31.4	127.4	0	1	NA	0	1	1	0	0	0.04	0.03	2.6	4.06	9.48523	4.50826	18.2915	135	185.4
1121	A	1	54	2	2	2	3	3	2	165	67	24.61	152	96	88	74	5.6	7.1	2.05	6.88	4.72	1.3	350	6.1	26.2	1.76	4.33	53.87	353.8	0	0	NA	0	0	0	0	0	0.03	0.01	2.46	6.57	6.19234	7.73439	50.7968	100.8	127.8
1122	A	1	51	2	2	2	7	3	3	167	64	22.95	163	64	82	96	6.5	15.4	1.66	6.26	2.81	2.33	387	8.7	63.9	1.41	38.97	40.25	193.2	0	1	NA	0	1	1	0	0	0.04	0.2	27.64	4.8	6.69145	5.77889	27.7387	117	277.2
1123	A	1	41	1	2	2	7	2	2	170	66	22.84	138	94	80	79	4.6	7.2	3.45	7.23	4.66	1.03	438	6.4	43.2	1.81	4.9	36.96	240.2	1	0	NA	0	1	0	0	0	0.05	0.02	2.71	6.5	10.3783	5.30653	34.4867	82.8	129.6
1124	A	2	50	2	2	2	1	2	2	170	69	23.88	101	79	81	91	5.4	8.1	2.17	5.23	2.9	1.43	280	5.8	26.8	2.85	3.99	60.61	253.1	0	0	NA	0	0	0	0	1	0.05	0.02	1.4	4.18	6.57323	8.70208	36.3388	97.2	145.8
1125	A	2	53	2	2	2	7	3	3	158	53	21.23	111	72	76	87	5.4	5.9	1.68	5.6	2.99	1.53	356	5.9	23.2	6.56	3.47	32.63	36.62	0	0	NA	0	0	0	0	0	0.2	0.09	0.53	1.12	20.8413	4.68485	5.25772	97.2	106.2
1126	A	2	64	1	2	1	7	3	3	155	61	25.39	134	83	82	90	6.4	7	3.47	4.35	2.14	1.13	315	6.2	44.7	2.01	2.46	32.46	120.3	0	0	NA	0	0	0	1	0	0.06	0.02	1.22	3.71	11.8674	4.66045	17.2721	115.2	126
1127	A	1	41	2	2	2	1	1	2	163	57	21.45	106	76	71	98	4.4	7.3	1.46	4.97	2.9	1.37	406	5.8	42.7	7.29	6.13	40.9	364.3	1	0	NA	0	0	0	0	0	0.18	0.02	0.84	8.91	8.37844	5.87222	52.3044	79.2	131.4
1128	A	1	62	2	2	1	2	2	2	170	69	23.88	146	89	88	84	5.9	11.1	2.32	5.4	3.23	1.24	485	6.5	45	1.58	6.29	21.26	296.1	1	1	NA	0	1	0	0	0	0.07	0.02	3.98	13.93	9.40742	3.0524	42.5126	106.2	199.8
1129	A	2	52	2	2	2	7	3	3	160	56	21.88	99	72	82	63	4.8	5.4	1.38	4.91	2.8	1.42	324	6.1	21.1	2.33	5.04	11.28	58.81	0	0	NA	0	0	0	0	0	0.21	0.09	2.16	5.21	39.3347	1.61953	8.44365	86.4	97.2
1130	A	2	37	2	2	2	7	2	2	157	54	21.91	99	69	79	83	5.2	5.3	1.45	4.58	2.61	1.26	265	5.1	31.2	3.24	4.77	26.48	136.8	0	0	NA	0	0	0	0	0	0.12	0.03	1.47	5.17	15.9278	3.80187	19.6411	93.6	95.4
1131	A	1	56	2	2	2	2	3	2	177	75	23.94	107	73	92	69	5.1	7	23.2	7.23	0.78	0.73	466	5.7	25.9	4.03	48.36	37.77	320.6	1	0	NA	0	0	0	0	0	0.11	0.15	12	8.49	8.46762	5.42283	46.0302	91.8	126
1132	A	2	44	2	2	2	7	3	3	162	60	22.86	103	71	70	66	5.3	4.5	1.6	6.77	3.96	1.89	243	5.6	48.2	2.08	3.85	48.63	178.1	0	0	NA	0	0	0	0	0	0.04	0.02	1.85	3.66	10.2264	6.98205	25.5707	95.4	81
1133	A	2	42	2	1	2	1	2	2	157	51	20.69	113	78	78	77	10.2	12.2	1.5	5.23	3.25	1.28	282	8	33	1.78	2.99	22.27	43.82	0	1	NA	1	1	1	0	0	0.08	0.07	1.68	1.97	13.3452	3.19742	6.29146	183.6	219.6
1134	A	2	44	2	2	2	1	2	2	160	49	19.14	92	61	72	72	4.3	6.1	1.65	5.46	2.53	1.97	366	5.6	42.3	1.82	14.88	28.19	283.1	0	0	NA	0	0	0	0	0	0.06	0.05	8.18	10.04	12.3537	4.04738	40.6461	77.4	109.8
1135	A	2	30	2	2	2	1	3	2	155	53	22.06	101	68	66	67	5.2	5.8	1.22	4.59	2.76	1.31	361	5.7	27.3	4.49	10.05	34.04	100.3	0	0	NA	0	0	0	0	0	0.13	0.1	2.24	2.95	15.1315	4.88729	14.4006	93.6	104.4
1136	A	1	40	2	2	2	1	2	2	158	61	24.44	126	86	83	71	5.3	6.4	4.12	2.43	1.48	0.93	473	5.3	44.2	2.52	11.14	14.4	166.8	1	0	NA	0	0	0	0	0	0.18	0.07	4.42	11.58	19.2392	2.06748	23.9483	95.4	115.2
1137	A	2	41	2	2	2	7	3	3	153	52	22.21	117	72	72	88	5.3	7.1	1.23	5.15	2.58	1.73	272	6	32.4	1.65	10.28	17.39	225.1	0	0	NA	0	0	0	0	0	0.09	0.05	6.23	12.94	14.7005	2.49677	32.3187	95.4	127.8
1138	A	2	55	2	2	2	7	3	3	153	66	28.19	112	69	98	99	5.9	7.1	1.83	5.86	3.71	1.28	470	6.7	37.5	2.34	6.97	21.86	295.3	1	0	NA	0	1	1	0	0	0.11	0.02	2.98	13.51	10.6125	3.13855	42.3977	106.2	127.8
1139	A	2	66	2	2	1	1	2	2	150	62	27.56	144	90	99	92	4.9	6.7	1.97	6.69	3.91	1.58	366	6	32.3	1.8	5.12	10.94	226.7	0	0	NA	0	0	0	0	0	0.16	0.02	2.84	20.72	20.1318	1.57071	32.5485	88.2	120.6
1140	A	2	58	2	2	2	1	2	2	158	68	27.24	121	82	101	119	14	26.8	5.82	7.99	3.36	1.56	276	11.8	33.5	1.55	2.09	49.22	102.1	0	1	NA	0	1	1	0	0	0.03	0.02	1.35	2.07	3.75202	7.06676	14.659	252	482.4
1141	A	2	36	2	2	2	7	2	2	152	58	25.1	109	74	72	89	5.1	5.8	1.16	5.17	2.78	1.66	321	5.6	36.8	3.23	4.97	25.23	155.4	0	0	NA	0	0	0	0	0	0.13	0.03	1.54	6.16	15.3754	3.6224	22.3116	91.8	104.4
1142	A	1	35	2	2	2	7	3	2	175	77	25.14	125	82	87	88	5	6.102	0.23	7.36	5.08	1.25	303	5.8	43.4	2.04	4.07	33.36	157	0	0	NA	0	0	0	0	0	0.06	0.03	2	4.71	13.0344	4.78966	22.5413	90	109.836
1143	A	2	42	2	2	2	1	3	3	160	58	22.66	130	75	74	NA	4.9	8.9	1.21	5.06	2.77	1.52	199	6.1	21.6	1.98	6	21.98	245.6	0	0	NA	0	0	0	0	1	0.09	0.02	3.03	11.17	12.2716	3.15578	35.262	88.2	160.2
1144	A	2	26	1	2	2	7	2	2	161	43	16.59	99	66	63	92	4.9	5	1	3.76	1.79	1.4	291	5.5	28.2	1.67	4.51	19.06	105.4	0	0	NA	0	0	0	0	0	0.09	0.04	2.7	5.53	22.8132	2.73654	15.1328	88.2	90
1145	A	2	35	2	2	2	7	3	3	163	54	20.32	116	68	65	NA	5.1	7.1	1.3	4.99	2.47	1.77	266	6	35.7	2.29	6.22	14.75	220.7	0	0	NA	0	0	0	0	0	0.16	0.03	2.72	14.96	16.6482	2.11773	31.687	91.8	127.8
1149	A	2	22	1	2	2	1	3	2	162	62	23.62	135	81	81	78	4.3	5.7	2.65	4.55	2.51	1.08	399	5	27.6	7.17	57.55	39.26	392	0	0	NA	0	0	0	0	0	0.18	0.15	8.03	9.98	9.06984	5.63676	56.2814	77.4	102.6
1152	A	2	47	2	2	2	7	3	2	161	52	20.06	113	78	73	81	5.3	6.9	1.54	6.52	3.59	1.96	310	6.1	32.8	2.15	3.45	26.58	77.16	0	0	NA	0	0	0	0	0	0.08	0.04	1.6	2.9	18.3278	3.81622	11.0782	95.4	124.2
1153	A	1	36	2	2	2	1	2	2	158	58	23.23	104	73	78	88	5.3	9.6	1.63	4.68	2.43	1.55	287	5.5	41.9	3.08	9.27	18.47	319.7	0	0	NA	0	0	0	0	1	0.17	0.03	3.01	17.31	11.0191	2.65183	45.9009	95.4	172.8
1154	A	2	34	2	2	2	1	2	2	164	58	21.56	97	58	74	96	4.7	7.9	1.56	5.46	3.32	1.43	283	5.4	34.2	2.02	5.2	28.97	232.1	0	0	NA	0	0	0	0	1	0.07	0.02	2.57	8.01	11.5636	4.15937	33.3238	84.6	142.2
1155	A	1	61	2	2	2	1	2	3	164	63	23.42	162	95	84	83	5.6	7.6	1.69	6.17	3.55	1.66	501	6.2	41.6	2.23	11.24	27.62	357.8	1	0	NA	0	0	0	0	0	0.08	0.03	5.04	12.95	8.72406	3.96554	51.3711	100.8	136.8
1156	A	2	44	2	2	2	1	2	2	169	68	23.81	109	64	81	92	4.8	8.3	1.53	4.08	2.32	1.13	275	5.4	44.3	1.68	5.59	11.6	168.4	0	0	NA	0	0	0	0	1	0.14	0.03	3.33	14.52	21.3578	1.66547	24.178	86.4	149.4
1157	A	2	49	2	2	3	3	2	2	156	56	23.01	158	108	80	85	4.9	5.5	2.52	6.97	4.45	1.46	399	5.8	33.7	7.77	24.09	105	560.1	0	0	NA	0	0	0	0	0	0.07	0.04	3.1	5.33	4.10228	15.0754	80.4164	88.2	99
1158	A	2	36	2	2	2	1	3	3	159	60	23.73	104	72	76	72	5.3	4.5	2.16	3.61	1.64	1.15	319	5.3	34	5.78	20.77	44.21	221	0	0	NA	0	0	0	0	0	0.13	0.09	3.59	5	9.91682	6.34745	31.7301	95.4	81
1160	A	1	31	2	2	2	7	3	3	NA	45	NA	98	70	69	84	4	4.8	1.88	5.65	2.77	1.75	316	5.6	59.7	2.95	7.33	8.32	214.8	0	0	NA	0	0	0	0	0	0.35	0.03	2.48	25.82	30.2745	1.19454	30.8399	72	86.4
1161	A	1	52	2	1	2	23	3	3	168	98	34.72	137	100	113	88	5.7	5.1	1.43	3.51	1.99	0.87	385	6.5	47.5	2.94	12.26	123.5	1065	0	0	NA	0	1	0	0	0	0.02	0.01	4.17	8.62	2.57452	17.7315	152.907	102.6	91.8
1163	A	2	79	2	2	2	1	2	2	149	56	25.22	137	78	91	90	7.4	9.4	1.77	5.91	3.13	1.7	483	6.1	47.8	6.37	38.85	46.66	1169	1	1	NA	0	0	0	0	0	0.14	0.03	6.1	25.05	2.91427	6.69921	167.839	133.2	169.2
1165	A	2	47	2	2	2	7	2	2	161	54	20.83	115	80	80	87	5.2	6.2	2.02	6.04	3.87	1.19	330	6	28.1	8.66	3.67	51.73	29.31	0	0	NA	0	0	0	0	0	0.17	0.13	0.42	0.57	15.524	7.42714	4.20818	93.6	111.6
1167	A	2	32	2	2	2	1	2	2	170	48	16.61	109	79	66	79	4.7	5.2	1.37	3.75	1.91	1.17	351	4.8	38.7	2.34	4.53	1.39	5.05	0	0	NA	0	0	0	0	0	1.68	0.9	1.94	3.63	379.194	0.199569	0.725054	84.6	93.6
1168	A	1	55	2	2	3	7	3	3	170	75	25.95	130	82	97	90	5	5.3	2.27	6.71	4.29	1.27	390	5.8	34.3	2.12	3.6	20.19	135.1	0	0	NA	0	0	0	0	0	0.11	0.03	1.7	6.69	19.2591	2.89878	19.397	90	95.4
1169	A	2	38	2	2	2	1	3	3	160	69	26.95	109	78	78	102	5.4	8	1.92	4.78	2.89	1.06	338	5.3	36.8	2.54	3.9	26.28	222.9	0	0	NA	0	0	0	0	1	0.1	0.02	1.54	8.48	11.2424	3.77315	32.0029	97.2	144
1170	A	2	28	2	2	2	1	2	2	163	53	19.95	116	84	69	81	4.6	4.8	1.2	4.96	2.19	1.94	311	5.6	21.1	1.49	3	16.2	65.44	0	0	NA	0	0	0	0	0	0.09	0.05	2.01	4.04	32.3614	2.32592	9.39555	82.8	86.4
1171	A	1	28	2	2	2	2	3	2	174	75	24.77	129	85	85	63	4.7	5.3	1.89	4.7	2.85	1.1	493	6.1	39.7	2.82	4.48	48.92	221.2	1	0	NA	0	0	0	0	0	0.06	0.02	1.59	4.52	9.81992	7.02369	31.7588	84.6	95.4
1172	A	1	27	2	2	2	6	2	2	171	66	22.57	82	68	79	NA	5.2	6.7	1.58	7.7	5.25	1.45	540	5.3	51.3	1.92	9.94	69.6	618.6	1	0	NA	0	0	0	0	0	0.03	0.02	5.18	8.89	4.49512	9.99282	88.8155	93.6	120.6
1173	A	1	24	2	2	2	1	2	2	166	67	24.31	134	89	83	72	4.7	6.9	2.45	5.11	3.02	1.25	543	5.6	49.5	2.42	6.42	48.97	1184	1	0	NA	0	0	0	0	0	0.05	0.01	2.65	24.18	4.2654	7.03087	169.993	84.6	124.2
1174	A	2	57	2	2	1	23	2	2	161	61	23.53	122	85	86	77	4.9	6.6	1.53	6.17	3.71	1.65	530	6	41.6	1.63	4.08	39.17	359.4	1	0	NA	0	0	0	0	0	0.04	0.01	2.5	9.18	8.25092	5.62383	51.6009	88.2	118.8
1175	A	1	61	2	2	1	1	2	2	171	75	25.65	135	79	90	68	6.6	8.8	1.69	4.04	1.93	1.4	387	6.2	50.1	7.77	11.26	37.77	195.4	0	0	NA	0	0	0	0	1	0.21	0.06	1.45	5.17	8.17968	5.42283	28.0546	118.8	158.4
1176	A	2	59	2	2	2	1	2	2	155	52	21.64	165	78	72	93	5.6	9.8	1.44	5.2	2.63	1.77	366	6.5	48	2.53	4.27	15.91	95.39	0	0	NA	0	1	0	0	1	0.16	0.04	1.69	6	19.8035	2.28428	13.6956	100.8	176.4
1177	A	1	58	2	2	2	7	2	2	172	69	23.32	126	76	94	64	5.5	6.9	2	4.87	2.58	1.38	436	5.8	70	3.02	5.93	49.73	193.8	1	0	NA	0	0	0	0	0	0.06	0.03	1.96	3.9	8.51532	7.13999	27.8248	99	124.2
1178	A	2	55	2	2	2	6	2	3	158	49	19.63	104	56	72	NA	4.7	5.7	1.94	5.41	2.39	1.88	354	6.1	49.3	2.61	3.45	43.33	107.7	0	0	NA	0	0	0	0	0	0.06	0.03	1.32	2.49	13.6832	6.22111	15.463	84.6	102.6
1179	A	2	68	2	2	2	7	3	2	157	65	26.37	115	78	86	88	4.7	7.2	1.86	6.11	3.46	1.61	433	6.1	45.1	2.1	5.21	23.68	184.3	1	0	NA	0	0	0	0	0	0.09	0.03	2.48	7.78	14.7453	3.39986	26.4609	84.6	129.6
1180	A	2	31	2	2	2	7	3	3	160	43	16.8	116	72	61	86	5	7.3	1.49	2.59	1.11	0.92	301	5.7	50	2.31	9.87	19.84	283.5	0	0	NA	0	0	0	0	0	0.12	0.03	4.27	14.29	12.7205	2.84853	40.7035	90	131.4
1181	A	2	60	2	2	2	7	3	3	150	43	19.11	144	95	67	109	5.3	7	1.7	5.48	2.95	1.61	270	5.9	34.2	1.63	4.49	18.95	86.37	0	0	NA	0	0	0	0	0	0.09	0.05	2.75	4.56	21.455	2.72075	12.4006	95.4	126
1182	A	2	39	2	2	1	7	3	3	150	45	20	183	92	64	NA	5.5	9	2.14	7.22	4.1	1.59	236	6	41.1	2.46	4.92	6.89	141.6	0	0	NA	0	0	0	0	1	0.36	0.03	2	20.55	27.0929	0.989232	20.3302	99	162
1183	A	2	54	2	2	2	1	2	2	156	56	23.01	128	80	82	81	6.1	9.9	1.91	4.25	2.24	1.2	257	6	45.9	1.64	5	35.05	328.2	0	0	NA	0	0	0	0	1	0.05	0.02	3.05	9.36	6.94236	5.0323	47.1213	109.8	178.2
1184	A	2	69	2	2	1	7	3	3	155	57	23.73	171	68	76	87	5.6	9.6	3.13	6.07	3.46	1.38	484	6.3	27.8	1.99	12.71	54.23	566.8	1	0	NA	0	0	0	0	1	0.04	0.02	6.39	10.45	4.57074	7.78607	81.3783	100.8	172.8
1185	A	2	41	2	2	2	1	2	2	163	47	17.69	132	76	68	87	5.2	5.5	0.71	4.42	2.2	1.4	323	5	28.1	2.12	6.02	21.85	212.3	0	0	NA	0	0	0	0	0	0.1	0.03	2.84	9.72	14.5048	3.13711	30.481	93.6	99
1187	A	2	53	2	2	2	7	3	2	160	65	25.39	112	73	81	85	5.3	8.6	1.86	4.71	2.43	1.48	317	6.3	26.2	1.7	5.91	23.54	237.9	0	0	NA	0	0	0	0	1	0.07	0.02	3.48	10.11	11.4933	3.37976	34.1565	95.4	154.8
1188	A	2	54	2	2	2	1	2	2	153	47	20.08	105	68	70	53	4.7	7.4	1.96	4.1	1.52	1.63	264	5.4	41.5	2.42	3.19	4.99	41.12	0	0	NA	0	0	0	0	0	0.48	0.08	1.32	8.24	67.6533	0.716439	5.9038	84.6	133.2
1189	A	2	38	2	2	2	7	3	3	147	44	20.36	113	67	65	76	4.4	5.6	2.36	4.89	2.71	1.24	239	5.6	33.3	2.03	17.26	8.98	342.7	0	0	NA	0	0	0	0	0	0.23	0.05	8.5	38.16	20.7606	1.2893	49.2032	79.2	100.8
1190	A	2	22	2	2	2	1	3	2	158	48	19.23	111	82	69	105	5.2	6.2	1.36	4.34	2.29	1.4	353	5.7	37.9	2.72	5.63	64.74	251	0	0	NA	0	0	0	0	0	0.04	0.02	2.07	3.88	7.03029	9.29505	36.0373	93.6	111.6
1192	A	2	47	2	2	2	6	2	2	149	73	32.88	120	79	91	78	5.5	8.5	2.05	5.46	3.2	1.33	344	6.2	28.8	2.44	7.93	50.78	629.7	0	0	NA	0	0	0	0	1	0.05	0.01	3.25	12.4	4.74438	7.29074	90.4092	99	153
1193	A	2	52	2	1	2	1	3	3	155	65	27.06	132	79	93	NA	14.3	16.2	3.06	7.55	4.46	1.55	244	10.4	29.2	2.99	2.15	52.2	72.64	0	1	NA	1	1	1	0	0	0.06	0.03	0.72	1.39	4.59038	7.49462	10.4293	257.4	291.6
1194	A	2	25	2	2	2	2	2	2	155	70	29.14	154	118	90	100	4.6	9.9	2.32	7.05	4.49	1.34	520	5.8	25.8	2.06	6.7	36.53	517.8	1	0	NA	0	0	0	0	1	0.06	0.01	3.25	14.17	6.65896	5.2448	74.3431	82.8	178.2
1195	A	1	53	2	2	2	1	2	2	171	72	24.62	122	70	86	63	5.3	6.2	0.94	4.13	2.2	1.36	537	5.4	37.2	19.76	74.53	83.84	283.7	1	0	NA	0	0	0	0	0	0.24	0.26	3.77	3.38	5.64695	12.0373	40.7322	95.4	111.6
1196	A	2	50	2	2	2	7	3	2	160	53	20.7	125	72	73	88	4.7	5.8	1.86	3.82	1.68	1.33	387	5.1	22.6	9.36	47.84	18.04	74.07	0	0	NA	0	0	0	0	0	0.52	0.65	5.11	4.11	27.0249	2.59009	10.6346	84.6	104.4
1197	A	1	51	2	2	2	6	3	2	172	81	27.38	131	84	101	79	5.5	5.2	2.31	5.14	2.96	1.29	380	5.1	32.2	22.18	67.49	51.17	181.4	0	0	NA	0	0	0	0	0	0.43	0.37	3.04	3.55	9.24743	7.34673	26.0445	99	93.6
1198	A	1	38	2	2	2	1	3	3	161	72	27.78	127	70	86	84	4.7	4.6	1.22	4.55	2.64	1.37	491	4.7	51.5	19.45	125.51	66.69	435.2	1	0	NA	0	0	0	0	0	0.29	0.29	6.45	6.53	6.39814	9.57502	62.4838	84.6	82.8
1199	A	1	45	2	2	3	7	2	2	166	79	28.67	146	83	99	87	5.7	9.2	1.48	6.53	3.89	1.43	432	5.4	42.6	41.34	134.7	103.2	1180	1	0	NA	0	0	0	0	1	0.4	0.11	3.26	11.43	2.3076	14.8169	169.419	102.6	165.6
1200	A	1	29	2	2	2	1	2	2	170	70	24.22	126	77	85	75	5.2	7.4	0.89	5.15	3.32	1.18	367	5.3	49	16.09	32.12	103.6	584.5	0	0	NA	0	0	0	0	0	0.16	0.05	2	5.64	3.58085	14.8744	83.9196	93.6	133.2
1201	A	1	45	1	2	2	2	3	3	169	77	26.96	140	84	96	78	5.6	6.2	2.21	5.79	3.03	1.45	455	5.6	35.4	54.05	234.3	178.3	436.3	1	0	NA	0	0	0	0	0	0.3	0.54	4.33	2.45	2.87589	25.5994	62.6418	100.8	111.6
1202	A	2	42	2	2	3	7	3	3	170	72	24.91	104	88	89	80	5.5	4.7	1.58	5.05	3	1.26	417	5.5	29.3	58.89	147.1	157.7	521	0	0	NA	0	0	0	0	0	0.37	0.28	2.5	3.3	3.15822	22.6418	74.8026	99	84.6
1203	A	2	52	1	2	2	7	3	3	148	50	22.83	138	88	76	96	5.8	8	1.11	6.24	3.83	1.65	420	5.5	23	14.5	31.51	54.95	315.9	0	0	NA	0	0	0	0	1	0.26	0.1	2.17	5.75	6.05957	7.88945	45.3553	104.4	144
1204	A	2	25	2	2	2	1	2	2	159	65	25.71	115	66	76	69	5	7.8	0.56	3.86	1.97	1.22	459	4.8	33.8	13.6	39.21	123.7	1093	1	0	NA	0	0	0	0	1	0.11	0.04	2.88	8.84	2.49352	17.7602	156.927	90	140.4
1205	A	2	38	2	2	2	1	2	3	164	62	23.05	126	83	80	76	6.5	8.6	1.96	4.06	2.43	1.01	346	6.1	25.8	19.14	70.46	87.1	797.7	0	0	NA	0	0	0	0	1	0.22	0.09	3.68	9.16	2.81386	12.5054	114.53	117	154.8
1206	A	2	36	2	2	2	1	2	2	165	59	21.67	110	75	72	70	5.2	6	0.68	5.36	2.73	1.88	205	5.5	27.4	20.27	111.2	72.18	418.9	0	0	NA	0	0	0	0	0	0.28	0.27	5.49	5.8	5.38621	10.3632	60.1436	93.6	108
1207	A	2	60	2	2	2	1	2	2	161	64	24.69	113	82	80	57	4.8	6.2	0.96	4.99	2.52	1.67	246	5.1	24.9	20.73	163.3	43.52	430.2	0	0	NA	0	0	0	0	0	0.48	0.38	7.88	9.89	7.41748	6.24838	61.766	86.4	111.6
1208	A	1	61	2	2	2	6	3	2	174	80	26.42	123	99	93	76	5.9	11.3	1.29	3.95	1.98	1.15	444	5.5	22	26.2	141.8	68.16	1333	1	1	NA	0	0	0	0	0	0.38	0.11	5.41	19.56	2.48588	9.78607	191.385	106.2	203.4
1209	A	2	38	2	2	2	2	2	2	161	69	26.62	103	67	85	73	4.9	6.5	0.98	5.07	3.2	1.25	375	5	37	15.07	64.49	108.4	833.4	0	0	NA	0	0	0	0	0	0.14	0.08	4.28	7.69	3.24067	15.5635	119.655	88.2	117
1210	A	2	51	2	2	2	7	2	1	158	50	20.03	136	91	72	81	5.7	6.4	0.81	5.04	2.18	1.99	355	5.3	49.4	12.66	46.14	39.15	249	0	0	NA	0	0	0	0	0	0.32	0.19	3.64	6.36	8.77351	5.62096	35.7502	102.6	115.2
1211	A	2	46	2	1	2	1	2	3	149	42	18.92	81	66	71	90	6.1	8.9	0.58	3.91	1.5	1.79	364	5.5	43.3	11.46	24.93	57.32	195.4	0	0	NA	0	0	0	0	1	0.2	0.13	2.18	3.41	6.72195	8.22972	28.0546	109.8	160.2
1212	A	2	40	2	2	2	1	1	1	149	52	23.42	129	89	81	94	5.4	10	1.43	4.98	2.41	1.67	388	5.7	38.7	20.23	130.3	147.5	951.4	1	0	NA	0	0	0	0	1	0.14	0.14	6.44	6.45	2.10788	21.1773	136.597	97.2	180
1213	A	2	68	1	2	1	6	3	2	155	62	25.81	141	91	90	65	6.2	13	1.35	4.68	2.56	1.4	476	5.7	51	24.43	35.86	128.3	1025	1	1	NA	0	0	0	0	0	0.19	0.03	1.47	7.99	1.84394	18.4207	147.164	111.6	234
1214	A	2	57	2	2	2	1	2	2	158	68	27.24	112	60	94	76	6	6.1	1.03	7.33	4.45	1.9	379	5.9	44	21.59	113.3	81.2	477	0	0	NA	0	0	0	0	0	0.27	0.24	5.25	5.87	4.26616	11.6583	68.4853	108	109.8
1215	A	2	53	2	2	3	1	2	3	159	46	18.2	135	69	68	82	5.5	5.5	0.48	6.64	2.7	2.75	307	5.2	29	10.09	50.66	38.55	277.2	0	0	NA	0	0	0	0	0	0.26	0.18	5.02	7.19	9.01814	5.53482	39.799	99	99
1216	A	2	62	2	2	2	6	1	2	166	85	30.85	127	68	102	85	5.4	6.8	2.57	6.49	3.54	1.4	391	5.5	34.8	22.32	67.3	92.38	335	1	0	NA	0	0	0	0	0	0.24	0.2	3.02	3.63	4.7985	13.2635	48.0976	97.2	122.4
1217	A	2	48	2	2	2	6	2	3	157	55	22.31	132	86	77	78	5.2	6.7	0.95	7.15	3.91	2.12	284	5.4	49	17.95	97.82	35.87	167.7	0	0	NA	0	0	0	0	0	0.5	0.58	5.45	4.68	11.5128	5.15004	24.0775	93.6	120.6
1218	A	2	66	2	2	NA	7	3	2	149	41	18.47	103	67	68	61	4.9	5.8	0.74	4.94	1.96	2.07	295	5.1	39.5	12.11	63.55	34.67	269.4	0	0	NA	0	0	0	0	0	0.35	0.24	5.25	7.77	10.4094	4.97775	38.6791	88.2	104.4
1219	A	1	70	2	1	1	2	3	3	172	75	25.35	112	66	93	98	10.1	20.4	1.96	4.31	2.17	1.3	393	6.8	35.3	36.62	108.95	81.95	645.2	0	1	NA	0	1	1	0	0	0.45	0.17	2.98	7.87	1.80627	11.766	92.6346	181.8	367.2
1220	A	1	55	2	2	1	6	3	2	165	78	28.65	152	109	98	76	5.8	7.7	0.96	6.9	3.99	2.07	567	5.1	70	19.79	65.08	120.7	540.9	1	0	NA	0	0	0	0	0	0.16	0.12	3.29	4.48	3.0949	17.3295	77.6597	104.4	138.6
1221	A	2	54	2	2	2	1	3	2	153	60	25.63	112	89	79	70	5.4	5.8	0.77	5.67	2.46	2.18	397	4.8	59.2	15.32	89.09	53.44	172	0	0	NA	0	0	0	0	0	0.29	0.52	5.82	3.22	9.06617	7.67265	24.6949	97.2	104.4
1222	A	2	52	2	2	2	1	2	2	150	48	21.33	145	94	73	92	5.8	10.1	0.95	5.4	3.36	1.46	302	5.1	42.6	15.7	77.26	35.78	497.4	0	0	NA	0	0	0	0	1	0.44	0.16	4.92	13.9	5.83457	5.13711	71.4142	104.4	181.8
1224	A	2	31	1	2	NA	1	3	2	160	59	23.05	106	92	71	99	4.7	6.5	0.79	3.82	2.06	1.07	341	5.2	36.9	20.31	148.72	74.61	407.7	0	0	NA	0	0	0	0	0	0.27	0.36	7.32	5.46	5.62288	10.7121	58.5355	84.6	117
1225	A	2	55	2	2	2	7	2	2	160	70	27.34	131	79	85	65	4.7	6.5	1.87	7.04	4.12	1.44	370	5.1	39.6	18.34	72.23	50.49	225.2	0	0	NA	0	0	0	0	0	0.36	0.32	3.94	4.46	9.04081	7.2491	32.3331	84.6	117
1226	A	1	57	2	2	2	2	1	2	161	67	25.85	122	85	88	67	5.2	7.2	1.26	6.08	3.41	1.87	493	5.6	51.1	17.55	82.71	54.16	526.4	1	0	NA	0	0	0	0	0	0.32	0.16	4.71	9.72	5.43505	7.77602	75.5779	93.6	129.6
1227	A	2	45	2	2	2	7	2	2	156	62	25.48	117	74	78	71	6	6.1	1.07	5.23	2.39	1.85	256	5.8	39.2	21.35	101.84	119.5	697.8	0	0	NA	0	0	0	0	0	0.18	0.15	4.77	5.84	2.90627	17.1572	100.187	108	109.8
1228	A	1	43	2	2	2	1	2	2	168	55	19.49	115	81	70	100	5.5	5.4	1.03	4.71	3	1.11	438	5.3	65.6	24.52	155.39	95.44	606.6	1	0	NA	0	0	0	0	0	0.26	0.26	6.34	6.36	3.86134	13.7028	87.0926	99	97.2
1229	A	2	49	1	2	2	1	2	2	158	77	30.84	166	79	92	96	6.3	8.9	2.53	4.72	2.42	1.15	453	5	22	38.53	158.47	87.43	479.7	1	0	NA	0	0	0	0	1	0.44	0.33	4.11	5.49	3.55153	12.5528	68.8729	113.4	160.2
1230	A	2	65	2	2	2	1	2	2	148	45	20.54	141	78	67	65	4.6	9.4	0.49	5.25	2.15	2.22	368	5.5	25.2	13.05	78.78	17.06	177.1	0	0	NA	0	0	0	0	1	0.76	0.44	6.04	10.38	16.7558	2.44939	25.4271	82.8	169.2
1231	A	1	67	2	2	1	6	1	1	165	60	22.04	133	78	78	72	5.3	9	2.82	5.53	2.8	1.27	432	4.9	30.7	11.17	58.48	51.19	422.2	1	0	NA	0	0	0	0	1	0.22	0.14	5.24	8.25	5.71045	7.34961	60.6174	95.4	162
1232	A	1	58	2	2	2	7	3	2	167	67	24.02	113	84	91	86	5.8	4.8	1.8	6.52	3.52	1.8	433	5.4	54.4	24.04	141.18	54.29	255.3	1	0	NA	0	0	0	0	0	0.44	0.55	5.87	4.7	7.61304	7.79469	36.6547	104.4	86.4
1233	A	2	54	2	2	2	7	3	2	158	58	23.23	100	73	84	93	5.2	7.3	2.73	4.68	2.15	1.37	333	5.1	45.1	31.97	112.98	103.2	693.5	0	0	NA	0	0	0	0	0	0.31	0.16	3.53	6.72	3.34761	14.8169	99.5693	93.6	131.4
1234	A	2	51	2	2	1	1	2	2	160	62	24.22	175	92	81	71	5.7	7.1	1.37	5.49	3	1.42	443	5.3	36.7	28.58	258.48	43.1	344.8	1	0	NA	0	0	0	0	0	0.66	0.75	9.04	8	7.00709	6.18808	49.5047	102.6	127.8
1235	A	2	63	2	2	1	1	2	2	149	62	27.93	172	86	86	80	5.9	7.8	0.75	5.16	2.61	1.76	539	5.5	35.5	37.51	113.13	160.2	951	1	0	NA	0	0	0	0	1	0.23	0.12	3.02	5.94	2.04016	23.0007	136.54	106.2	140.4
1236	A	2	51	1	1	2	7	2	2	157	58	23.53	110	74	77	71	7	8.3	0.84	3.63	1.15	1.74	338	6.4	48.5	17.13	82.49	35.76	273.2	0	1	NA	1	1	0	0	0	0.48	0.3	4.82	7.64	7.11433	5.13424	39.2247	126	149.4
1237	A	2	55	1	2	1	7	3	3	165	72	26.45	164	100	85	75	7.7	12.1	2.07	7.08	4.03	1.77	477	6.1	46	41.31	94.48	91.92	569.9	1	1	NA	0	0	0	0	0	0.45	0.17	2.29	6.2	2.54112	13.1974	81.8234	138.6	217.8
1238	A	2	48	2	2	2	7	3	2	151	60	26.31	156	95	88	73	5.3	7.3	4.47	4.82	2.16	1.13	397	5.1	28.4	23.69	56.39	83.47	365.5	0	0	NA	0	0	0	0	0	0.28	0.15	2.38	4.38	4.89194	11.9842	52.4767	95.4	131.4
1239	A	1	50	2	2	2	7	3	1	166	78	28.31	125	79	93	65	4.8	4	0.9	4.75	2.36	1.52	502	5.5	54.8	19.3	45.86	48.51	72.29	1	0	NA	0	0	0	0	0	0.4	0.63	2.38	1.49	15.5549	6.96482	10.379	86.4	72
1240	A	1	50	2	2	2	7	3	1	158	57	22.83	128	88	82	96	5.6	5.3	0.9	4.25	2.32	1.41	348	5.1	70	16.49	137.79	57.44	887	0	0	NA	0	0	0	0	0	0.29	0.16	8.36	15.44	4.25282	8.24695	127.351	100.8	95.4
1241	A	2	80	2	2	3	7	3	3	150	67	29.78	142	82	98	81	5.5	7.6	0.69	6.62	3.55	2.01	357	5.5	39.6	14.13	64.65	58.54	615	0	0	NA	0	0	0	0	0	0.24	0.11	4.58	10.51	4.59149	8.40488	88.2986	99	136.8
1242	A	2	41	1	2	2	2	2	2	165	59	21.67	105	82	70	92	6.1	7.1	1.16	5	3.17	1.27	290	5.5	35.3	16.75	75.76	80.45	607.3	0	0	NA	0	0	0	1	0	0.21	0.12	4.52	7.55	3.66647	11.5506	87.1931	109.8	127.8
1243	A	2	52	1	2	1	7	3	2	157	62	25.15	166	83	88	69	5.4	10.1	1.06	5.01	2.7	1.44	474	5.8	24.6	22.57	163.68	70.38	1129	1	0	NA	0	0	0	0	1	0.32	0.14	7.25	16.04	2.91147	10.1048	162.096	97.2	181.8
1244	A	2	48	2	2	2	1	2	2	151	52	22.81	136	83	76	69	5.2	7.5	0.58	5.32	2.77	1.68	379	5.7	30.5	12.2	68.18	37.71	505.1	0	0	NA	0	0	0	0	0	0.32	0.13	5.59	13.39	6.65615	5.41421	72.5197	93.6	135
1245	A	2	65	2	2	2	7	3	1	151	55	24.12	99	64	80	83	5.8	8.2	2.86	6.46	3.62	1.59	547	5.9	21.3	18.87	103.87	91.61	1281	1	0	NA	0	0	0	0	1	0.21	0.08	5.5	13.98	2.4219	13.1529	183.92	104.4	147.6
1246	A	2	40	1	2	2	1	2	2	160	57	22.27	115	64	75	85	5.7	8.7	1.01	4.58	2.51	1.31	333	5.5	27.9	19.99	104.39	79.32	619.1	0	0	NA	0	0	0	0	1	0.25	0.17	5.22	7.81	3.62919	11.3884	88.8873	102.6	156.6
1247	A	1	53	2	1	2	6	2	2	163	84	31.62	130	77	105	87	8.3	18.5	2.72	5.27	2.7	1.36	300	11.1	44	87.98	404.19	216.2	631.5	0	1	NA	0	1	1	0	0	0.41	0.64	4.59	2.92	1.21206	31.0409	90.6676	149.4	333
1248	A	2	50	2	2	2	7	3	3	155	57	23.73	122	68	78	64	4.7	8.3	2.24	6.12	3.72	1.33	527	5.4	21.1	13.6	55.78	47.3	242.4	1	0	NA	0	0	0	0	1	0.29	0.23	4.1	5.12	8.45772	6.7911	34.8026	84.6	149.4
1249	A	2	63	2	2	2	7	2	2	169	77	26.96	107	81	97	88	11.1	24.5	2.49	5.64	3.14	1.45	361	8.3	41.6	51.76	92.84	62.24	177.3	0	1	NA	0	1	1	0	0	0.83	0.52	1.79	2.85	3.18837	8.93611	25.4559	199.8	441
1250	A	2	62	2	2	1	3	2	2	166	75	27.22	156	87	93	62	5.9	10.2	2.58	5.98	3.15	1.52	493	6.2	48.5	21.66	103.1	42.34	339.2	1	0	NA	0	0	0	0	1	0.51	0.3	4.76	8.01	6.24733	6.07897	48.7006	106.2	183.6
1251	A	1	52	2	2	2	1	2	2	166	65	23.59	148	93	85	96	5.5	11	0.82	5.73	2.74	2.16	441	5.3	67.5	23.47	235.63	44.49	466.1	1	0	NA	0	0	0	0	1	0.53	0.51	10.04	10.48	5.38999	6.38765	66.9203	99	198
1252	A	1	59	2	1	2	1	2	3	164	68	25.28	133	79	85	67	9.2	18.9	0.75	5.04	2.82	1.37	362	6.8	58	22.57	78.73	37.9	360.1	0	1	NA	1	1	1	0	0	0.6	0.22	3.49	9.5	3.91896	5.44149	51.7014	165.6	340.2
1253	A	2	61	2	2	2	6	3	3	155	47	19.56	132	85	74	82	6.3	7	0.71	6.53	3.86	2.01	333	5.3	38.1	13.69	40.29	57.61	486.9	0	0	NA	0	0	0	1	0	0.24	0.08	2.94	8.45	4.77343	8.27136	69.9067	113.4	126
1254	A	2	45	2	2	2	7	2	2	154	54	22.77	130	97	75	94	6	8	1.59	7.23	4.2	1.56	364	5.9	24.1	28.65	174.68	70.36	721.3	0	0	NA	0	0	0	0	1	0.41	0.24	6.1	10.25	3.57772	10.1019	103.561	108	144
1255	A	2	71	2	2	2	3	2	2	153	50	21.36	121	80	80	97	6	6.8	1.11	7.25	4.15	1.67	274	5.8	28.2	14.54	49.32	44.9	243.1	0	0	NA	0	0	0	0	0	0.32	0.2	3.39	5.41	7.76566	6.44652	34.9031	108	122.4
1256	A	2	27	2	2	2	7	3	3	159	59	23.34	99	65	77	98	5.4	6.6	0.6	4.61	2.41	1.42	370	5.1	29.5	18	95.93	74.79	489.6	0	0	NA	0	0	0	0	0	0.24	0.2	5.33	6.55	4.67929	10.738	70.2943	97.2	118.8
1257	A	1	30	2	2	2	7	3	2	171	78	26.67	123	79	87	79	7.5	10.6	1.57	3.68	1.83	1.27	392	6.1	39.9	84	239.83	74.66	561.5	0	1	NA	0	0	0	0	0	1.13	0.43	2.86	7.52	3.04777	10.7193	80.6174	135	190.8
1258	A	2	48	2	2	2	6	2	2	159	69	27.29	121	77	86	78	5.2	6.8	0.83	6.38	3.87	1.91	335	5.5	33.8	13.29	64.54	46.16	399.9	0	0	NA	0	0	0	0	0	0.29	0.16	4.86	8.66	6.82742	6.62742	57.4156	93.6	122.4
1259	A	1	53	2	2	2	1	2	2	171	65	22.23	154	106	88	67	4.9	6.4	1.34	5.33	3.11	1.44	393	5.5	47.7	11.82	46.85	27.28	188.4	0	0	NA	0	0	0	0	0	0.43	0.25	3.96	6.91	13.5586	3.91673	27.0495	88.2	115.2
1260	A	2	36	2	2	2	7	2	2	154	51	21.5	112	71	65	81	4.7	4.9	0.89	3.92	1.67	1.67	299	4.9	36.8	15.08	49.68	47.41	300.4	0	0	NA	0	0	0	0	0	0.32	0.17	3.29	6.34	8.97198	6.80689	43.1299	84.6	88.2
1261	A	2	50	2	2	2	1	2	2	154	53	22.35	152	94	68	65	5.3	6.6	0.62	5.56	2.59	1.98	327	5.7	36	7.74	46.45	16.03	268.5	0	0	NA	0	0	0	0	0	0.48	0.17	6	16.75	14.429	2.30151	38.5499	95.4	118.8
1262	A	2	42	2	2	2	7	3	3	158	67	26.84	132	76	90	90	6	8.5	1.95	4.45	2.34	1.29	371	5.7	43.5	29.8	121.27	115.8	498.8	0	0	NA	0	0	0	0	1	0.26	0.24	4.07	4.31	3.11006	16.626	71.6152	108	153
1263	A	1	63	2	2	1	6	1	2	168	68	24.09	147	89	83	73	6	10.2	2.4	4.64	2.14	1.4	421	5.7	46.9	13.72	43.75	57.67	439.3	1	0	NA	0	0	0	0	1	0.24	0.1	3.19	7.62	4.63666	8.27997	63.0725	108	183.6
1264	A	2	51	2	2	1	6	3	1	160	56	21.88	131	81	83	80	5.3	6.4	1.13	6.18	3.18	1.9	294	5.2	32.5	15.32	77.4	52.01	349	0	0	NA	0	0	0	0	0	0.29	0.22	5.05	6.71	6.80498	7.46734	50.1077	95.4	115.2
1265	A	2	54	2	1	1	1	2	1	166	58	21.05	137	90	71	81	5.7	9	3	6.83	3.84	1.31	384	5.5	24	23.22	97.89	112	1221	0	0	NA	0	0	0	0	1	0.21	0.08	4.22	10.9	2.18806	16.0804	175.305	102.6	162
1266	A	1	57	2	2	1	1	2	2	161	62	23.92	141	88	86	65	5.6	8.9	1.24	7.09	4.43	1.48	425	5.1	44.4	18.86	103.76	75.06	705.5	1	0	NA	0	0	0	0	1	0.25	0.15	5.5	9.4	3.54808	10.7767	101.292	100.8	160.2
1267	A	2	67	2	2	2	1	2	2	156	63	25.89	131	75	92	85	6.2	11.2	1.76	5.93	3.7	1.33	394	5.8	33.6	26.76	143	68.28	815.7	0	1	NA	0	0	0	0	0	0.39	0.18	5.34	11.95	3.03277	9.8033	117.114	111.6	201.6
1268	A	1	41	2	2	2	1	3	2	175	64	20.9	116	88	86	69	4.8	5.3	6.87	4.82	2.59	1.66	543	5.1	39.4	20.69	109.24	42.74	433	1	0	NA	0	0	0	0	0	0.48	0.25	5.28	10.13	7.79462	6.1364	62.168	86.4	95.4
1269	A	2	43	1	2	2	6	2	2	160	69	26.95	146	101	90	90	5.9	12.6	3.51	7.17	2.88	2.15	203	5.5	29.1	20.75	108.35	82.86	777.4	0	1	NA	0	0	0	0	0	0.25	0.14	5.22	9.38	2.77447	11.8966	111.615	106.2	226.8
1270	A	2	45	2	2	2	7	2	2	158	60	24.03	129	73	79	75	5.8	6.4	1.68	8.37	5.28	1.86	321	5.6	42	16.47	54.46	78.08	329.7	0	0	NA	0	0	0	0	0	0.21	0.17	3.31	4.22	5.15587	11.2103	47.3367	104.4	115.2
1271	A	2	38	2	2	2	7	3	3	163	79	29.73	125	84	97	75	5.3	6.6	1.85	6.04	2.98	2.04	412	5	39.1	23.56	88.46	118.8	555.8	0	0	NA	0	0	0	0	0	0.2	0.16	3.75	4.68	3.4422	17.0567	79.799	95.4	118.8
1272	A	2	38	2	2	2	1	2	2	154	58	24.46	113	76	76	94	5.7	7.9	1.13	4.4	2.04	1.77	420	5.2	40.9	38.14	272.46	89.29	858	0	0	NA	0	0	0	0	1	0.43	0.32	7.14	9.61	3.02224	12.8198	123.187	102.6	142.2
1273	A	2	41	2	2	NA	7	3	2	161	65	25.08	115	82	81	101	5.4	7.1	1.18	4.98	2.5	1.49	315	5	43.1	17.55	100.4	69.89	627.7	0	0	NA	0	0	0	0	0	0.25	0.16	5.72	8.98	4.26598	10.0345	90.122	97.2	127.8
1274	A	2	45	2	2	2	7	3	3	149	49	22.07	103	61	74	92	5.4	8.6	1	4.76	2.72	1.5	271	5.3	24.7	13.4	67.98	76.91	958.9	0	0	NA	0	0	0	0	1	0.17	0.07	5.07	12.47	3.15345	11.0424	137.674	97.2	154.8
1275	A	2	41	2	2	2	7	3	2	165	59	21.67	107	79	80	99	5.8	7.1	1.37	6.21	3.94	1.53	292	5	31.3	23.06	154.35	57.97	514.8	0	0	NA	0	0	0	0	0	0.4	0.3	6.69	8.88	4.90996	8.32304	73.9124	104.4	127.8
1276	A	2	46	2	2	3	7	3	3	148	53	24.2	126	90	84	96	5.7	10	0.91	5.55	2.53	2.02	325	4.9	35.5	22.66	78.24	75.64	533	0	0	NA	0	0	0	0	1	0.3	0.15	3.45	7.05	3.81272	10.86	76.5255	102.6	180
1277	A	1	47	1	1	2	6	3	2	168	67	23.74	151	92	82	97	10.5	13.5	2.91	6.54	3.26	1.39	422	8.2	41.9	108.83	110.36	67.86	129.3	1	1	NA	1	1	1	0	0	1.6	0.85	1.01	1.91	4.21465	9.743	18.5642	189	243
1278	A	2	48	2	2	1	6	3	2	142	64	31.74	155	103	98	101	6	14.2	1.23	4.35	2.17	1.37	341	5.3	41	22.07	40.69	147.8	2158	0	1	NA	0	0	0	0	0	0.15	0.02	1.84	14.6	1.20415	21.2204	309.835	108	255.6
1279	A	1	27	2	2	2	1	2	2	165	57	20.94	152	68	71	74	5.6	5.8	1.11	4.53	2.53	1.29	392	4.8	48.5	19.2	70.73	66.46	271.2	0	0	NA	0	0	0	0	0	0.29	0.26	3.68	4.08	6.46565	9.542	38.9375	100.8	104.4
1280	A	2	32	2	2	1	1	2	2	150	54	24	102	73	82	76	6	6.4	1.37	5.94	3.29	1.65	336	5.3	26.9	14.56	57.02	43.01	229.7	0	0	NA	0	0	0	0	0	0.34	0.25	3.92	5.34	8.28432	6.17516	32.9792	108	115.2
1281	A	1	32	2	2	2	7	2	2	173	62	20.72	100	76	77	71	5.3	5	0.69	4.22	2.28	1.31	395	4.1	30.1	38.72	104.38	89.76	313.8	0	0	NA	0	0	0	0	0	0.43	0.33	2.7	3.5	5.50334	12.8873	45.0538	95.4	90
1282	A	2	55	2	2	2	7	2	2	153	53	22.64	121	75	76	120	7.1	6.7	1.08	5.83	3.48	1.38	236	5.6	44.1	42.16	100.07	126.6	620.7	0	1	NA	0	0	0	0	0	0.33	0.16	2.37	4.9	2.54182	18.1766	89.117	127.8	120.6
1283	A	2	47	1	2	2	7	3	3	160	64	25	117	73	85	72	5.2	7.3	2	5.46	2.95	1.52	315	5	35.8	17.7	137.27	80.84	873.7	0	0	NA	0	0	0	0	0	0.22	0.16	7.76	10.81	3.45551	11.6066	125.441	93.6	131.4
1284	A	1	42	2	2	2	7	3	3	159	63	24.92	123	90	83	89	4.8	5.5	1.05	6.59	4.17	1.51	376	5.4	28.4	13.12	44.48	74.69	310.2	0	0	NA	0	0	0	0	0	0.18	0.14	3.39	4.15	6.49142	10.7236	44.537	86.4	99
1285	A	2	68	2	2	2	1	3	3	142	41	20.33	131	84	70	91	5.2	7.8	2.87	5.77	2.91	1.6	389	5.4	42.6	35.19	76.28	89.69	123.4	0	0	NA	0	0	0	0	1	0.39	0.62	2.17	1.38	6.8085	12.8772	17.7172	93.6	140.4
1286	A	2	38	2	1	1	7	2	2	158	54	21.63	121	81	77	84	4.7	7.2	1.54	5.58	3.36	1.23	388	4.7	35.4	22.27	159.36	120.5	1233	0	0	NA	0	0	0	0	0	0.18	0.13	7.16	10.23	2.56232	17.3008	177.028	84.6	129.6
1287	A	2	41	2	2	2	3	2	3	158	55	22.03	105	66	72	73	5.2	7.8	0.64	6.18	3.26	1.95	377	5.4	44.3	10.71	51.27	42.28	517.6	0	0	NA	0	0	0	0	1	0.25	0.1	4.79	12.24	6.11773	6.07035	74.3144	93.6	140.4
1288	A	2	37	2	2	2	7	3	3	154	53	22.35	103	66	74	64	5.4	7	1.16	5.78	3.23	1.81	395	5.5	34.9	11.83	49.08	74.16	421.2	0	0	NA	0	0	0	0	0	0.16	0.12	4.15	5.68	4.9343	10.6475	60.4738	97.2	126
1289	A	2	47	2	2	2	7	3	2	159	53	20.96	111	71	78	83	5.1	5.3	2.65	6.15	3.37	1.46	359	5.5	38	14.58	50.6	50.38	218	0	0	NA	0	0	0	0	0	0.29	0.23	3.47	4.33	9.13845	7.23331	31.2994	91.8	95.4
1290	A	1	64	2	2	2	2	1	2	166	65	23.59	120	83	87	96	5.4	9.9	2.72	7.64	4.36	1.45	601	5.3	40.4	23.21	119.07	68.65	866.4	1	0	NA	0	0	0	0	1	0.34	0.14	5.13	12.62	3.36046	9.85642	124.393	97.2	178.2
1291	A	2	43	1	2	2	1	2	2	161	71	27.39	139	80	90	48	5.8	8.2	3.52	5.38	2.45	1.46	323	5.4	41.9	41.18	240.1	113	966	0	0	NA	0	0	0	0	1	0.36	0.25	5.83	8.55	2.45952	16.224	138.693	104.4	147.6
1292	A	2	50	1	2	2	23	2	2	165	78	28.65	107	74	90	74	6.1	9.2	2.42	5.93	3.09	1.44	493	5.4	52	47.72	192.73	209.7	750.3	1	0	NA	0	0	0	0	1	0.23	0.26	4.04	3.58	1.78539	30.1077	107.724	109.8	165.6
1293	A	2	48	1	2	2	1	2	3	164	73	27.14	109	74	88	71	5.5	5.9	1.08	5.54	3.31	1.49	416	5.2	38.6	15.35	104.1	45.93	300.6	0	0	NA	0	0	0	0	0	0.33	0.35	6.78	6.54	7.74687	6.5944	43.1587	99	106.2
1294	A	1	53	2	2	2	1	2	2	172	73	24.68	132	91	85	62	5.1	6.5	2.01	7.98	4.82	1.77	499	5.5	39.9	19.67	66.58	91.79	490.3	1	0	NA	0	0	0	0	0	0.21	0.14	3.38	5.34	4.35283	13.1788	70.3948	91.8	117
1296	A	1	53	2	2	2	6	3	2	169	59	20.66	116	79	84	69	5.3	5.9	1.17	6.3	3.42	2.01	324	5.3	40.8	14.72	99.42	42.3	322.7	0	0	NA	0	0	0	0	0	0.35	0.31	6.75	7.63	8.08379	6.07322	46.3317	95.4	106.2
1297	A	2	43	2	2	2	1	3	3	157	44	17.85	94	65	68	80	4.9	5.4	0.82	4.54	2.25	1.62	241	5.1	32	11.39	49.52	36	239.7	0	0	NA	0	0	0	0	0	0.32	0.21	4.35	6.66	10.9343	5.1687	34.4149	88.2	97.2
1298	A	2	67	1	2	2	1	2	2	156	61	25.07	161	79	91	62	6	6	1.81	5.5	2.94	1.67	460	5.6	31.2	18.63	110.15	58.35	374.9	1	0	NA	0	0	0	0	0	0.32	0.29	5.91	6.43	5.73618	8.3776	53.8263	108	108
1299	A	2	38	2	2	2	23	2	2	155	58	24.14	116	84	74	85	5.3	9.1	3.24	6.08	3.11	1.33	471	5.1	34	28.66	298	121.3	1223	1	0	NA	0	0	0	0	1	0.24	0.24	10.4	10.08	2.19372	17.4156	175.592	95.4	163.8
1300	A	2	67	2	2	1	7	3	2	150	55	24.44	150	85	87	67	4.9	8.6	1.59	7.41	4.27	1.79	338	5.3	35.2	15.96	18.09	52.91	488.1	0	0	NA	0	0	0	0	1	0.3	0.04	1.13	9.23	5.62396	7.59655	70.079	88.2	154.8
1301	A	2	63	1	2	1	23	3	3	155	63	26.22	163	99	93	108	7.4	17.3	1.54	4.33	2.22	1.46	416	6.5	34.9	62.4	142.64	146	937.9	0	1	NA	0	1	0	0	0	0.43	0.15	2.29	6.42	1.43894	20.962	134.659	133.2	311.4
1302	A	1	69	2	2	2	1	3	3	166	58	21.05	123	78	66	89	6.6	9.6	0.8	5.17	2.36	1.99	482	5.9	45.2	13.97	105.8	22.86	250.1	1	0	NA	0	0	0	0	1	0.61	0.42	7.57	10.94	9.47461	3.28212	35.9081	118.8	172.8
1303	A	2	48	2	2	2	3	2	2	152	53	22.94	123	79	73	90	5.6	5.9	1.23	5.81	2.94	2.04	263	5.1	34	15.12	70.3	61.97	504.7	0	0	NA	0	0	0	0	0	0.24	0.14	4.65	8.14	5.14612	8.89734	72.4623	100.8	106.2
1304	A	1	52	1	1	2	6	1	1	175	59	19.27	100	53	86	110	5.3	18.3	2.72	7.28	3.83	2.03	508	9.3	41	21.85	40.4	29.67	75.44	1	1	NA	1	1	1	0	0	0.74	0.54	1.85	2.54	12.3909	4.25987	10.8313	95.4	329.4
1305	A	1	53	2	1	1	6	3	2	155	51	21.23	120	87	84	112	5.9	11.1	4.81	6.18	2.03	1.68	352	5.7	66.3	16.63	134.69	30.17	297.8	0	1	NA	1	0	0	0	0	0.55	0.45	8.1	9.87	7.76825	4.33166	42.7566	106.2	199.8
1306	A	2	48	2	2	2	1	2	2	159	53	20.96	116	81	68	84	4.7	6.4	0.96	4.16	1.54	1.84	367	4.8	31.1	14.03	85.24	56.09	384	0	0	NA	0	0	0	0	0	0.25	0.22	6.08	6.85	6.81953	8.05312	55.1328	84.6	115.2
1307	A	2	51	2	2	2	1	3	3	162	65	24.77	101	75	85	82	5.6	7.1	0.55	4.83	2.46	1.64	320	5	25.9	11.5	49.08	26.57	263	0	0	NA	0	0	0	0	0	0.43	0.19	4.27	9.9	10.4619	3.81479	37.7602	100.8	127.8
1308	A	2	77	2	2	2	1	2	2	145	47	22.35	120	71	76	99	5.6	10.7	0.71	5.48	2.52	2.04	305	5.1	35.5	13.26	64.05	52.59	530.2	0	0	NA	0	0	0	0	1	0.25	0.12	4.83	10.08	4.62683	7.55061	76.1235	100.8	192.6
1309	A	2	46	2	2	2	1	2	2	165	55	20.2	93	75	69	84	4.5	4.4	0.52	5.63	2.6	2.09	376	5	33.5	12.1	42.85	33.43	105.7	0	0	NA	0	0	0	0	0	0.36	0.41	3.54	3.16	17.9308	4.79971	15.1759	81	79.2
1310	A	1	69	2	2	2	7	3	2	165	68	24.98	144	91	89	61	7	6.6	1.36	5.93	3.52	1.44	410	6.3	54.4	28.21	52.77	62.83	116.4	0	1	NA	0	0	0	0	0	0.45	0.45	1.87	1.85	7.47431	9.02082	16.7121	126	118.8
1311	A	1	51	2	2	2	7	2	2	173	77	25.73	126	77	90	72	6.3	9.2	0.73	3.76	1.7	1.37	384	4.7	41.3	27.81	221.57	43.76	516.3	0	0	NA	0	0	0	0	1	0.64	0.43	7.97	11.8	5.00249	6.28284	74.1278	113.4	165.6
1312	A	2	46	2	2	2	1	3	3	154	55	23.19	107	62	72	76	5.6	5.7	0.96	5.92	3.56	1.41	201	5.3	36.6	9.15	52.97	31.71	448.2	0	0	NA	0	0	0	0	0	0.29	0.12	5.79	14.13	7.88619	4.55276	64.3503	100.8	102.6
1313	A	1	68	2	2	2	1	2	2	162	49	18.67	135	57	69	67	5	5.6	0.69	4.74	2.21	1.78	357	5.3	42.6	10.29	59.73	18.2	114	0	0	NA	0	0	0	0	0	0.57	0.52	5.8	6.26	21.6715	2.61307	16.3676	90	100.8
1314	A	2	65	2	2	2	1	2	3	154	43	18.13	126	81	74	87	6.3	9.4	1.15	5.71	2.73	2.02	287	5.5	30.4	18.34	109.18	60.65	961.2	0	0	NA	0	0	0	0	1	0.3	0.11	5.95	15.85	3.12572	8.70782	138.004	113.4	169.2
1315	A	1	56	2	1	2	1	2	2	158	57	22.83	112	67	85	73	5.4	7.7	2.07	6.46	4.13	1.32	436	5.5	60.3	8.43	29.02	28.14	309.5	1	0	NA	0	0	0	0	0	0.3	0.09	3.44	11	9.43968	4.0402	44.4365	97.2	138.6
1316	A	1	52	1	2	1	6	2	3	161	55	21.22	157	96	78	83	5.8	6.3	1.95	7.66	5.33	1.48	447	5.6	38.7	14.97	38.57	44.15	447.8	1	0	NA	0	0	0	0	0	0.34	0.09	2.58	10.14	6.26825	6.33884	64.2929	104.4	113.4
1317	A	1	49	1	2	1	1	1	2	168	84	29.76	125	80	91	62	7.4	7.8	1.77	5.67	3.25	1.29	508	5.8	52.7	39.8	184.59	92.41	933.1	1	1	NA	0	0	0	0	0	0.43	0.2	4.64	10.1	2.37034	13.2678	133.97	133.2	140.4
1318	A	1	57	2	2	3	7	3	3	170	53	18.34	126	73	76	66	5.2	6	1.17	5.27	2.17	2.18	320	4.9	60	23.67	718.39	107.2	156.6	0	0	NA	0	0	0	0	0	0.22	4.59	30.35	1.46	6.03022	15.3912	22.4838	93.6	108
1319	A	2	57	2	2	2	2	2	2	168	67	23.74	112	65	88	74	5.8	7.2	5.28	8.28	2.84	1.71	353	4.8	40.3	23.77	104.1	65.01	525.9	0	0	NA	0	0	0	0	0	0.37	0.2	4.38	8.09	4.54718	9.33381	75.5061	104.4	129.6
1320	A	1	62	2	2	2	1	2	2	166	63	22.86	138	93	86	87	5.9	12.1	3.16	3.94	1.84	1.03	356	6	39.9	37.26	107.34	107.5	540.5	0	1	NA	0	0	0	0	0	0.35	0.2	2.88	5.03	2.84528	15.4343	77.6023	106.2	217.8
1321	A	2	32	2	2	3	7	3	3	158	47	18.83	108	69	66	91	5	6.9	0.77	4.83	2.68	1.64	320	5	37.3	11.45	49.12	40.17	389.9	0	0	NA	0	0	0	0	0	0.29	0.13	4.29	9.71	7.63308	5.76741	55.9799	90	124.2
1322	A	1	30	2	2	2	7	3	3	166	61	22.14	131	76	80	92	5.8	8.3	0.83	4.15	2.02	1.44	420	5.1	42.8	21.56	97.06	79.91	1108	0	0	NA	0	0	0	0	1	0.27	0.09	4.5	13.87	2.77756	11.4731	159.081	104.4	149.4
1323	A	2	55	2	2	1	7	3	3	157	66	26.78	146	63	95	78	9.8	13.7	1.09	5.53	3.29	1.36	356	7	49.3	35.21	60.38	104	238.9	0	1	NA	0	1	1	0	0	0.34	0.25	1.71	2.3	2.70042	14.9318	34.3001	176.4	246.6
1324	A	1	63	2	2	1	7	3	3	166	70	25.4	160	89	87	66	5.7	4.1	0.41	4.6	2.6	1.45	542	5.1	56.5	19.36	64.22	54.2	146.7	1	0	NA	0	0	0	0	0	0.36	0.44	3.32	2.71	9.9229	7.78177	21.0625	102.6	73.8
1325	A	2	41	2	2	2	1	2	2	152	65	28.13	128	63	87	48	5.2	7.9	1.11	5.11	3.22	1.39	419	5.6	19.7	12.15	61.61	83.24	542.9	0	0	NA	0	0	0	0	1	0.15	0.11	5.07	6.52	4.10714	11.9512	77.9469	93.6	142.2
1326	A	1	44	2	2	1	6	3	3	165	76	27.92	169	87	93	70	4.9	6.4	2.25	5.31	3.18	1.13	511	5.1	44.4	66.37	292.14	197.7	1058	1	0	NA	0	0	0	0	0	0.34	0.28	4.4	5.35	2.08735	28.3848	151.902	88.2	115.2
1327	A	2	28	2	2	2	1	2	2	158	47	18.83	124	73	64	103	5.6	7.7	0.56	3.03	1.24	1.28	346	5.2	35.1	23.42	130.42	81.82	441.8	0	0	NA	0	0	0	0	0	0.29	0.3	5.57	5.4	4.33232	11.7473	63.4314	100.8	138.6
1328	A	2	47	2	2	2	1	2	2	151	58	25.44	122	87	86	77	5	8.5	2.12	4.97	2.64	1.33	351	5.2	36.3	18.73	91.67	36.81	398	0	0	NA	0	0	0	0	1	0.51	0.23	4.89	10.81	7.4455	5.285	57.1429	90	153
1330	A	2	34	1	1	2	1	2	2	160	53	20.7	97	61	80	78	5.5	5.5	1.26	4.81	2.62	1.39	381	5	47.1	16.42	67.51	56.46	180.1	0	0	NA	0	0	0	0	0	0.29	0.37	4.11	3.19	8.60914	8.10625	25.8579	99	99
1331	A	2	55	2	2	2	1	1	2	151	40	17.54	127	74	65	71	5	5.9	0.87	5.65	3	2.03	227	5.1	31.9	11.18	45.74	20.81	111.4	1	0	NA	0	0	0	0	0	0.54	0.41	4.09	5.35	19.9854	2.9878	15.9943	90	106.2
1332	A	1	68	2	2	2	7	2	2	172	75	25.35	128	80	94	80	6.7	6.6	2.84	4.52	2.2	1.14	526	5.6	48	29.7	33.45	177.7	154.9	1	0	NA	0	0	0	1	0	0.17	0.22	1.13	0.87	3.37218	25.5133	22.2398	120.6	118.8
1333	A	2	62	2	2	2	7	2	2	168	70	24.8	132	70	102	68	5.1	5.2	0.96	4.09	1.48	1.82	383	5.5	44.1	37.48	30.55	77.11	63.44	0	0	NA	0	0	0	0	0	0.49	0.48	0.82	0.82	10.2566	11.0711	9.1084	91.8	93.6
1334	A	1	70	2	1	2	6	2	2	165	70	25.71	130	80	90	63	7.5	7.6	1.57	5.95	3.34	1.58	427	7.1	46	117.72	105.79	403	393.9	1	1	NA	1	1	1	0	0	0.29	0.27	0.9	0.98	1.28323	57.8607	56.5542	135	136.8
1336	A	2	59	2	2	2	7	2	2	160	68	26.56	142	80	100	72	5.6	5.4	1.51	7.34	4.27	1.53	467	5.8	38.7	28.4	51.9	49.8	80.77	1	0	NA	0	0	0	0	0	0.57	0.64	1.83	1.62	12.2279	7.15004	11.5966	100.8	97.2
1337	A	1	65	2	2	2	7	2	2	168	70	24.8	132	86	90	78	4.7	4.7	2.9	6.84	3.58	1.46	445	5.4	39.9	28.81	29.19	51.22	44.68	1	0	NA	0	0	0	0	0	0.56	0.65	1.01	0.87	16.6126	7.35391	6.41493	84.6	84.6
1338	A	1	55	2	2	2	7	2	2	162	66	25.15	153	97	85	74	5.74	7.41	0.75	3.71	1.8	1.41	405	5.9	57.2	7.51	116.1	28.42	313.4	0	0	NA	0	0	0	0	0	0.26	0.37	15.46	11.03	9.03751	4.0804	44.9964	103.32	133.38
1339	A	2	56	2	2	2	7	2	2	155	55	22.89	149	91	77	75	5.11	7.48	1.58	4.92	2.97	1.1	374	5.5	29.5	3.26	143.3	42.9	562.3	0	0	NA	0	0	0	0	0	0.08	0.25	43.96	13.11	5.98794	6.15937	80.7322	91.98	134.64
1340	A	2	51	1	2	1	2	2	2	160	84	32.81	191	133	101	115	6.7	14.56	2.71	5.25	2.69	1.41	442	6.6	26.8	25.89	158.2	93.41	1000	1	1	NA	0	1	1	0	0	0.28	0.16	6.11	10.71	2.02895	13.4113	143.575	120.6	262.08
1341	A	2	31	2	2	2	1	2	2	151	71	31.14	116	76	90	90	4.84	4.36	5.24	5.13	2.25	1.08	374	4.9	32.8	12.23	115.5	81.46	417.3	0	0	NA	0	0	0	0	0	0.15	0.28	9.44	5.12	5.75366	11.6956	59.9139	87.12	78.48
1342	A	1	30	2	2	2	1	2	2	164	79	29.37	127	84	91	86	4.78	5.8	4.75	5.73	3.02	0.96	440	5.5	40.7	30.65	63.75	181.8	378.1	1	0	NA	0	0	0	0	0	0.17	0.17	2.08	2.08	3.41091	26.1019	54.2857	86.04	104.4
1343	A	1	45	2	2	2	1	3	2	174	78	25.76	132	100	89	94	5.64	3.52	2.35	5.52	3.36	1.13	443	5.4	47.5	11.82	79.16	79.94	168.2	1	0	NA	0	0	0	0	0	0.15	0.47	6.7	2.1	7.64471	11.4774	24.1493	101.52	63.36
1344	A	1	45	2	2	2	7	3	2	175	76	24.82	139	97	86	69	5.01	6.05	1.37	3.86	2.13	1.21	388	4.1	43.2	3.63	47.15	21.5	212.3	0	0	NA	0	0	0	0	0	0.17	0.22	12.99	9.87	14.6636	3.08686	30.481	90.18	108.9
1345	A	2	53	1	2	2	1	3	2	152	58	25.1	123	85	85	78	6.31	6.09	1.59	5.34	2.58	1.87	278	5.1	40.1	14.34	26.36	24.22	54.4	0	0	NA	0	0	0	1	0	0.59	0.48	1.84	2.25	20.0493	3.47739	7.81048	113.58	109.62
1346	A	2	49	2	2	2	6	1	1	159	62	24.52	131	77	83	84	5.46	5.79	1.09	5.41	2.98	1.51	356	5.5	31.4	8.36	130.2	41.58	299.9	1	0	NA	0	0	0	0	0	0.2	0.43	15.57	7.21	8.28669	5.96985	43.0581	98.28	104.22
1347	A	2	54	2	2	NA	7	3	2	156	46	18.9	171	105	71	80	4.72	9.21	2.35	5.59	3.32	1.38	298	5.5	25.4	22.22	232.5	130.7	2030	0	0	NA	0	0	0	0	1	0.17	0.11	10.46	15.53	1.79596	18.7653	291.457	84.96	165.78
1348	A	1	55	2	2	2	7	2	2	171	85	29.07	150	98	102	83	5.07	8.58	1.7	6.68	4.26	1.72	384	5.3	48.7	9.8	181.5	88.21	897.1	0	0	NA	0	0	0	0	1	0.11	0.2	18.52	10.17	3.15546	12.6648	128.801	91.26	154.44
1349	A	1	55	1	2	2	1	2	2	170	83	28.72	113	77	96	54	5.61	8.15	1.62	5.84	3.26	1.46	548	5.7	37.9	2.38	77.41	37.26	225.5	1	0	NA	0	0	0	0	1	0.06	0.34	32.53	6.05	8.90199	5.34961	32.3762	100.98	146.7
1350	A	1	54	2	2	2	6	2	2	170	82	28.37	153	99	97	92	5.65	4.81	2.08	5.79	3.44	1.37	426	5.1	40.9	13.16	93.36	96.16	402.6	1	0	NA	0	0	0	0	0	0.14	0.23	7.09	4.19	4.59669	13.8062	57.8033	101.7	86.58
1351	A	2	52	2	2	2	7	3	2	164	65	24.17	150	94	78	75	4.73	4.92	0.92	4.7	2.2	1.65	372	5.4	29.8	3	39.7	27.99	286.5	0	0	NA	0	0	0	0	0	0.11	0.14	13.23	10.24	12.209	4.01866	41.1342	85.14	88.56
1352	A	2	66	2	2	1	7	3	3	152	54	23.37	131	73	83	67	11.89	14.92	1.12	5.54	3.03	1.48	343	7.2	40.3	12.25	85.81	62.26	345.3	0	1	NA	0	1	1	0	0	0.2	0.25	7	5.55	2.72107	8.93898	49.5765	214.02	268.56
1353	A	2	49	2	2	1	7	2	3	158	69	27.64	134	102	84	82	5.42	6.31	0.88	6.22	3.72	1.85	247	5.1	34.2	2.95	65.54	51	360.9	0	0	NA	0	0	0	0	0	0.06	0.18	22.22	7.08	6.69652	7.32233	51.8162	97.56	113.58
1354	A	2	48	2	2	2	1	3	2	165	68	24.98	115	78	80	79	6.02	7.12	1.08	6.17	3.53	1.58	285	5.4	41.1	3.99	80.45	60.18	392.6	0	0	NA	0	0	0	0	0	0.07	0.2	20.16	6.52	5.27124	8.64034	56.3676	108.36	128.16
1355	A	2	29	2	1	2	1	2	2	157	72	29.21	119	80	92	79	11.41	21.44	2.45	4.96	2.93	1.2	296	9.2	32.3	16.72	71.6	80.15	230.9	0	1	NA	0	1	1	0	0	0.21	0.31	4.28	2.88	2.53164	11.5075	33.1515	205.38	385.92
1356	A	1	63	1	2	2	1	2	2	168	72	25.51	128	83	92	76	8.51	14.13	1.93	5.8	3.76	1.22	351	6.6	36.3	7.32	39.97	51.79	139.2	0	1	NA	0	1	1	0	0	0.14	0.29	5.46	2.69	5.60593	7.43575	19.9856	153.18	254.34
1357	A	2	28	1	2	NA	1	2	2	158	63	25.24	105	71	79	84	5.58	6.37	1.07	4.02	2.4	1.12	306	4.9	30.9	5.22	62.2	90.52	497.3	0	0	NA	0	0	0	0	0	0.06	0.13	11.92	5.49	4.1085	12.9964	71.3999	100.44	114.66
1358	A	2	53	2	2	1	7	3	2	151	61	26.75	177	87	85	64	6.16	7.63	1.54	4.62	2.48	1.12	455	6	51.3	17.61	221.8	104	701.5	1	0	NA	0	0	0	1	0	0.17	0.32	12.6	6.75	2.90106	14.9318	100.718	110.88	137.34
1359	A	2	67	2	2	2	1	2	2	159	57	22.55	100	75	85	73	5.61	6.75	1.77	5.07	2.65	1.6	393	5.5	26.7	10.02	65.55	75.03	323.8	0	0	NA	0	0	0	0	0	0.13	0.2	6.54	4.32	5.3725	10.7724	46.4896	100.98	121.5
1360	A	2	39	1	2	2	7	2	2	155	47	19.56	115	68	67	73	4.92	4.97	1.65	6.06	3.33	1.67	287	4.9	26.1	3.49	61.96	31.49	326.4	0	0	NA	0	0	0	0	0	0.11	0.19	17.75	10.37	10.4505	4.52118	46.8629	88.56	89.46
1361	A	2	38	2	2	2	7	3	2	154	62	26.14	113	79	87	78	5.14	11.48	0.59	4.03	2.39	1.14	292	5.1	45.2	2.67	179.4	76.24	2624	0	1	NA	0	0	0	0	0	0.04	0.07	67.19	34.42	1.84539	10.9462	376.741	92.52	206.64
1362	A	2	63	2	2	2	7	3	3	151	47	20.61	131	75	78	78	5.19	6.45	1.54	5.9	3.02	1.96	290	5.5	26.7	13.83	154.3	77.57	803.9	0	0	NA	0	0	0	0	0	0.18	0.19	11.16	10.36	3.80774	11.1371	115.42	93.42	116.1
1363	A	2	52	2	2	2	2	2	2	156	50	20.55	152	99	69	58	5.05	7.07	1.2	6.19	3.13	1.82	322	5.5	37.8	13.12	127.4	56.58	410.2	0	0	NA	0	0	0	0	0	0.23	0.31	9.71	7.25	6.08687	8.12347	58.8945	90.9	127.26
1364	A	1	54	2	2	2	1	3	2	184	79	23.33	146	80	89	NA	5.65	9.09	1.6	5.18	2.99	1.19	376	5.6	54.9	6.56	84.31	48.38	220.2	0	0	NA	0	0	0	0	1	0.14	0.38	12.85	4.55	7.43937	6.94616	31.6152	101.7	163.62
1365	A	2	56	2	2	2	4	2	1	158	55	22.03	120	84	76	89	6.01	6.49	3.43	6.63	3.53	1.46	336	5.3	32	2.75	65.24	29.95	523.6	0	0	NA	0	0	0	0	0	0.09	0.12	23.72	17.48	6.93441	4.30007	75.1759	108.18	116.82
1366	A	1	23	2	2	2	7	3	2	171	61	20.86	112	77	72	89	4.57	6.64	1.62	5.64	3.37	1.38	401	5.3	30.8	8.17	82.17	50.46	812	0	0	NA	0	0	0	0	0	0.16	0.1	10.06	16.09	5.18292	7.2448	116.583	82.26	119.52
1367	A	1	38	2	2	NA	1	2	3	165	70	25.71	127	75	89	79	4.55	4.842	0.37	5.57	3.16	1.19	477	5.1	42.4	2.86	35.36	19.31	95.21	1	0	NA	0	0	0	0	0	0.15	0.37	12.36	4.93	25.1746	2.77243	13.6698	81.9	87.156
1368	A	2	64	2	2	2	7	3	3	150	59	26.22	147	89	88	69	5.25	6.42	0.71	6.04	3.22	1.88	401	5.4	50.3	4.1	61.52	60.99	388.1	0	0	NA	0	0	0	0	0	0.07	0.16	15	6.36	5.97403	8.75664	55.7215	94.5	115.56
1369	A	2	41	2	2	2	7	3	2	155	55	22.89	118	87	76	78	5.46	7.48	0.97	5.12	2.52	1.73	308	5.4	37.1	15.38	137.9	42.99	385.5	0	0	NA	0	0	0	0	0	0.36	0.36	8.97	8.97	6.78361	6.17229	55.3482	98.28	134.64
1370	A	2	42	2	2	2	7	3	3	147	49	22.68	126	92	75	80	5.34	8.69	1.63	6.52	4.24	1.36	353	5	35.2	7.17	138.9	54.6	1121	0	0	NA	0	0	0	0	1	0.13	0.12	19.37	20.53	3.52901	7.8392	160.948	96.12	156.42
1371	A	2	54	2	1	2	7	3	3	152	52	22.51	112	74	77	76	9.03	8.8	2.73	5.38	2.99	1.04	405	7.5	34.7	16.59	91.9	186.7	271.9	0	1	NA	1	1	1	0	0	0.09	0.34	5.54	1.46	2.08435	26.8055	39.038	162.54	158.4
1372	A	1	54	2	2	2	1	2	2	166	69	25.04	127	88	96	59	4.97	9.98	2.25	7.2	4.64	1.18	488	5.3	42.7	14.85	189.4	42.39	1822	1	0	NA	0	0	0	0	1	0.35	0.1	12.75	42.98	3.19359	6.08615	261.594	89.46	179.64
1373	A	1	29	2	2	2	1	1	2	166	70	25.4	140	82	78	99	6.72	16.78	4.26	6.61	3.27	1.51	460	5.7	34.6	3.47	98.25	35.2	2627	1	1	NA	0	0	0	0	0	0.1	0.04	28.31	74.63	2.01172	5.05384	377.172	120.96	302.04
1374	A	1	56	2	2	2	7	3	3	170	67	23.18	133	98	86	82	5.5	5.41	0.96	6.1	3.98	1.19	488	5.8	45	3.79	57.07	81.42	301.9	1	0	NA	0	0	0	0	0	0.05	0.19	15.06	3.71	5.65508	11.6899	43.3453	99	97.38
1375	A	1	49	2	2	2	1	2	2	160	60	23.44	124	90	81	66	4.42	5.14	1.12	4.07	2.08	1.42	396	5.3	30.9	2.93	59.51	23.15	104.3	0	0	NA	0	0	0	0	0	0.13	0.57	20.31	4.51	21.9176	3.32376	14.9749	79.56	92.52
1376	A	2	42	2	2	2	7	3	3	149	52	23.42	116	69	71	72	5.38	7.08	0.51	5.85	3.4	1.71	215	5.2	34.6	3.47	66.47	35.2	304.9	0	0	NA	0	0	0	0	0	0.1	0.22	19.16	8.66	8.63881	5.05384	43.776	96.84	127.44
1377	A	1	45	2	2	2	7	3	3	170	77	26.64	115	69	93	79	5.04	6.26	2.2	5.34	2.98	1.38	250	5.4	44.5	7.52	115.6	80.1	650.7	0	0	NA	0	0	0	0	0	0.09	0.18	15.37	8.12	4.23846	11.5004	93.4243	90.72	112.68
1378	A	1	56	2	2	NA	7	3	3	167	76	27.25	175	110	90	76	5.85	5.99	0.7	6.37	3.47	1.78	526	5.5	56.7	7.62	89.73	47.16	222.2	1	0	NA	0	0	0	0	0	0.16	0.4	11.78	4.71	8.25033	6.771	31.9024	105.3	107.82
1379	A	2	55	2	2	NA	1	3	3	149	54	24.32	143	102	84	NA	5.62	6.34	0.94	6.89	3.97	1.98	299	5.2	33.4	1.96	46.11	39.14	346.7	0	0	NA	0	0	0	0	0	0.05	0.13	23.53	8.86	7.68123	5.61953	49.7775	101.16	114.12
1380	A	2	45	2	2	2	7	2	2	154	47	19.82	141	83	68	78	5.09	4.62	0.42	4.04	1.83	1.62	187	5.4	32.5	3.11	44.74	22.64	195	0	0	NA	0	0	0	0	0	0.14	0.23	14.39	8.61	15.682	3.25054	27.9971	91.62	83.16
1381	A	1	50	2	2	2	1	2	2	165	77	28.28	165	104	95	89	7.17	12.56	1.95	5.69	3.22	1.59	534	7.3	58	4.96	185.3	68.37	404.4	1	1	NA	0	1	1	0	0	0.07	0.46	37.36	5.91	3.61908	9.81622	58.0617	129.06	226.08
1382	A	1	45	2	2	2	7	3	3	164	55	20.45	102	76	75	68	4.78	7.98	1.5	4.53	2.53	1.18	332	5.3	49.1	12.44	153.5	38.18	553.6	0	0	NA	0	0	0	0	1	0.33	0.28	12.34	14.5	6.59236	5.48169	79.4831	86.04	143.64
1383	A	1	65	2	2	2	7	2	2	161	66	25.46	118	65	92	77	12.38	18.26	1.26	7.03	4.42	1.41	452	9.1	45.4	17.46	54.62	55.44	88.28	1	1	NA	0	1	1	0	0	0.31	0.62	3.13	1.59	4.45147	7.9598	12.6748	222.84	328.68
1384	A	2	36	2	2	2	3	2	2	160	53	20.7	156	110	69	117	5.48	7.97	1.2	6.6	3.77	1.66	342	5.3	54.7	3.18	145.5	62.53	1028	0	0	NA	0	0	0	0	1	0.05	0.14	45.75	16.44	3.45195	8.97775	147.595	98.64	143.46
1385	A	2	37	2	2	2	1	3	2	152	49	21.21	106	83	70	78	5.34	6.55	1.24	5.44	1.68	2.69	351	4.4	30.2	8.45	184.1	48.09	343.2	0	0	NA	0	0	0	0	0	0.18	0.54	21.79	7.14	7.08011	6.90452	49.2749	96.12	117.9
1386	A	2	38	2	1	2	1	3	3	152	79	34.19	117	82	92	77	6.18	9.01	5.77	4.91	2.84	1.26	276	5.4	41.3	3.87	62.35	85.57	678.3	0	0	NA	0	0	0	0	1	0.05	0.09	16.11	7.93	3.12417	12.2857	97.3869	111.24	162.18
1387	A	2	40	2	2	2	1	2	2	152	56	24.24	111	72	76	81	5.17	7.38	1.6	6.16	3.3	1.9	256	5	35.1	21.89	218.8	60.57	501.9	0	0	NA	0	0	0	0	0	0.36	0.44	10	8.29	5.20515	8.69634	72.0603	93.06	132.84
1388	A	2	45	2	2	3	7	3	3	152	58	25.1	107	82	77	96	5.53	7.93	2.35	4.81	2.57	1.24	442	4.9	46.7	9.45	111	55.71	748.8	1	0	NA	0	0	0	0	1	0.17	0.15	11.75	13.44	4.23703	7.99856	107.509	99.54	142.74
1389	A	1	45	2	2	2	7	3	2	175	70	22.86	130	81	80	80	5.48	6.36	1.65	5.03	2.79	1.41	378	5.4	54.6	13.75	175.9	83.48	679.2	0	0	NA	0	0	0	0	0	0.16	0.26	12.79	8.14	3.80759	11.9856	97.5162	98.64	114.48
1390	A	1	55	2	2	NA	1	2	2	172	68	22.99	147	107	86	86	4.7	7.85	2.39	2.66	2.46	1.17	446	5.5	36.6	5.39	113	37.48	542.6	1	0	NA	0	0	0	0	1	0.14	0.21	20.96	14.48	6.83383	5.38119	77.9038	84.6	141.3
1391	A	2	62	1	2	2	1	2	2	152	79	34.19	131	84	66	87	5.47	7.48	2.22	5.23	2.3	1.73	319	5.4	32.5	9.03	162.4	50.53	1110	0	0	NA	0	0	0	0	0	0.18	0.15	17.98	21.97	3.79706	7.25485	159.368	98.46	134.64
1392	A	1	18	2	2	2	7	3	3	178	59	18.62	128	85	63	73	5.29	7.04	0.96	4.38	2.08	1.54	407	4.8	39.7	10.82	114.3	65.34	946.1	0	0	NA	0	0	0	0	0	0.17	0.12	10.56	14.48	3.72743	9.38119	135.836	95.22	126.72
1393	A	1	46	2	2	2	7	3	2	170	68	23.53	118	81	83	80	7.45	11.41	1	6.53	3.79	1.24	369	4.2	57.9	14.41	113.2	71.94	1111	0	1	NA	0	0	0	0	0	0.2	0.1	7.86	15.44	2.23802	10.3288	159.512	134.1	205.38
1394	A	1	55	2	2	2	36	2	2	171	73	24.96	123	88	90	64	5.34	8.57	3.67	6.88	4.13	1.19	416	5	35.3	8.17	205.2	50.45	477.3	0	0	NA	0	0	0	0	1	0.16	0.43	25.12	9.46	5.503	7.24336	68.5284	96.12	154.26
1395	A	1	60	2	2	1	6	2	2	172	70	23.66	136	97	87	57	7.83	7.62	1.23	4.41	2.32	1.32	354	5	42	10.78	101.8	50.1	638.7	0	1	NA	0	0	0	0	0	0.22	0.16	9.44	12.75	3.78763	7.19311	91.7014	140.94	137.16
1396	A	1	28	1	2	2	1	2	2	172	74	25.01	114	72	87	70	4.65	5.42	2.37	5.39	3.39	1.17	453	5.1	45	3.34	256.7	92.57	980.7	1	0	NA	0	0	0	0	0	0.04	0.26	76.86	10.59	3.58796	13.2907	140.804	83.7	97.56
1397	A	1	45	2	2	2	1	1	2	185	88	25.71	124	91	93	75	5.54	8.46	1.8	4.24	2.32	1.03	439	5.6	40.9	11.83	115.8	95.34	1756	1	0	NA	0	0	0	0	1	0.12	0.07	9.79	18.42	2.0916	13.6884	252.118	99.72	152.28
1398	A	2	54	2	2	2	7	3	1	147	47	21.75	124	86	72	104	5.74	9.37	2.96	6.71	3.26	1.6	264	5.9	46	6.89	59.46	75.55	1149	0	0	NA	0	0	0	0	1	0.09	0.05	8.63	15.21	2.73203	10.8471	164.968	103.32	168.66
1399	A	1	48	1	1	2	4	2	2	162	65	24.77	130	83	81	82	7.21	12.28	1.47	6.89	4.21	1.39	499	7	55.8	3.38	148.3	49.81	590	1	1	NA	1	1	1	0	0	0.07	0.25	43.88	11.85	3.65697	7.15147	84.7093	129.78	221.04
1400	A	2	49	2	2	2	2	2	3	153	63	26.91	132	91	74	70	5.74	4.99	1.52	6.02	2.83	1.84	299	5.3	42.2	3.63	54.01	50.76	191	0	0	NA	0	0	0	0	0	0.07	0.28	14.88	3.76	8.90163	7.28787	27.4228	103.32	89.82
1401	A	2	54	2	1	2	1	2	2	150	72	32	129	93	85	85	6.67	8.53	0.97	5.82	3.22	1.67	415	6.7	30.7	14.25	75.59	71.62	369.4	0	0	NA	0	1	1	0	1	0.2	0.2	5.3	5.16	4.32462	10.2828	53.0366	120.06	153.54
1402	A	2	53	2	2	2	7	3	2	149	46	20.72	140	109	70	110	6.25	6.67	0.91	6.16	2.68	2.25	351	5.6	45	12.93	126.1	33.35	431	0	0	NA	0	0	0	1	0	0.39	0.29	9.75	12.92	6.92049	4.78823	61.8808	112.5	120.06
1403	A	2	53	2	2	2	235	2	2	148	45	20.54	130	78	70	61	5.72	8.16	1.44	6.63	4.02	1.41	308	5.5	41.3	11.46	100.9	31.66	402.1	0	0	NA	0	0	0	0	1	0.36	0.25	8.8	12.7	7.41149	4.54559	57.7315	102.96	146.88
1404	A	1	56	2	2	2	7	3	2	172	77	26.03	128	87	95	88	5.13	7.62	1.8	6.79	4.02	1.65	348	5	42.1	6.53	169.2	71.88	1348	0	0	NA	0	0	0	0	0	0.09	0.13	25.91	18.75	2.99526	10.3202	193.539	92.34	137.16
1405	A	2	53	2	2	2	1	2	2	159	59	23.34	121	82	75	69	5.27	5.77	1.1	4.48	1.96	1.56	338	5.4	39.8	13.61	103.6	64.12	416.4	0	0	NA	0	0	0	0	0	0.21	0.25	7.61	6.49	5.78011	9.20603	59.7846	94.86	103.86
1406	A	1	48	2	2	3	7	3	3	167	67	24.02	129	82	86	78	4.55	11.6	2.08	6.22	3.25	1.52	400	5.3	57	3.91	184	19.12	446.8	0	1	NA	0	0	0	0	0	0.2	0.41	47.06	23.37	9.56505	2.74515	64.1493	81.9	208.8
1407	A	2	53	2	2	2	1	2	2	145	51	24.26	163	104	79	102	5.35	8.05	1.11	5.87	2.96	1.74	303	5.3	46.1	6.94	98.42	54.95	782.8	0	0	NA	0	0	0	0	1	0.13	0.13	14.18	14.25	4.25999	7.88945	112.391	96.3	144.9
1408	A	1	48	2	2	2	1	2	2	167	72	25.82	145	102	93	93	6.12	8.62	1.75	5.15	3.11	1.29	322	5.3	47.9	5.99	84.8	55.29	873.3	0	0	NA	0	0	0	0	1	0.11	0.1	14.16	15.79	3.59599	7.93826	125.384	110.16	155.16
1409	A	1	63	2	2	1	6	3	2	167	77	27.61	163	110	94	81	4.85	6.1	2.37	5.5	3.03	1.11	489	5.3	70	7.43	226.6	42.48	427.2	1	0	NA	0	0	0	0	0	0.17	0.53	30.5	10.06	7.51809	6.09907	61.3352	87.3	109.8
1410	A	2	63	2	2	2	7	3	2	147	47	21.75	144	74	73	83	5.24	8.88	1.57	5.81	2.91	1.6	289	5.2	32	12.43	118.2	28.9	541.2	0	0	NA	0	0	0	0	1	0.43	0.22	9.51	18.73	7.00924	4.14932	77.7028	94.32	159.84
1411	A	2	41	2	2	2	1	2	2	152	65	28.13	122	88	75	86	5.14	5.76	1.83	6.08	3.51	1.38	397	5	33.3	7.71	68.35	48.4	299.4	0	0	NA	0	0	0	0	0	0.16	0.23	8.87	6.19	7.96886	6.94903	42.9864	92.52	103.68
1412	A	2	66	1	2	2	1	2	2	159	66	26.11	115	63	86	64	5.05	8.05	1.58	5.01	2.65	1.29	331	5.3	33.8	22.98	180.1	70.77	591.5	0	0	NA	0	0	0	0	1	0.32	0.3	7.84	8.36	4.39496	10.1608	84.9246	90.9	144.9
1413	A	1	59	2	2	2	1	3	3	166	66	23.95	126	74	85	64	5.19	7.07	1.26	6.26	3.14	2.08	243	5.6	43.8	3.47	60.46	20.97	182.6	0	0	NA	0	0	0	0	0	0.17	0.33	17.42	8.71	14.8489	3.01077	26.2168	93.42	127.26
1414	A	1	47	1	1	3	1	2	2	161	58	22.38	89	62	81	97	9.35	9.28	5.85	6.79	3.1	1.17	419	5.8	20.6	184.4	186	178.7	318.2	0	1	NA	0	0	0	0	0	1.03	0.58	1.01	1.78	1.96775	25.6569	45.6856	168.3	167.04
1415	A	2	48	2	2	2	7	3	2	151	43	18.86	100	65	61	68	5.16	5.7	1.26	6.63	3.2	2.16	330	5.2	39	9.8	73.32	36.95	254.2	0	0	NA	0	0	0	0	0	0.27	0.29	7.48	6.88	9.9672	5.3051	36.4968	92.88	102.6
1416	A	2	34	2	2	2	7	3	2	163	48	18.07	105	69	67	83	4.62	4.98	1.84	3.06	1.69	1.46	328	4.7	36.1	10.31	49.51	24.93	250.1	0	0	NA	0	0	0	0	0	0.41	0.2	4.8	10.03	14.0337	3.57933	35.9081	83.16	89.64
1417	A	2	43	2	2	2	1	3	2	154	64	26.99	133	97	83	74	4.79	6.35	0.55	4.83	2.2	1.88	281	5.2	42.7	13.96	97.62	34.85	455.8	0	0	NA	0	0	0	0	0	0.4	0.21	6.99	13.08	8.10179	5.00359	65.4415	86.22	114.3
1418	A	1	49	2	2	2	1	2	2	165	64	23.51	123	91	82	88	5.56	5.63	1.13	5.89	3.48	1.5	407	5.6	49.3	12.72	99.67	48.42	535.6	0	0	NA	0	0	0	0	0	0.26	0.19	7.84	11.06	5.83445	6.9519	76.8988	100.08	101.34
1419	A	1	47	2	1	2	4	3	3	168	66	23.38	105	63	78	78	7.28	10.23	1.36	5	2.85	1.36	379	6.1	56.5	2.16	38.07	15.68	77.35	0	1	NA	0	0	0	0	0	0.14	0.49	17.63	4.93	17.9467	2.25126	11.1055	131.04	184.14
1420	A	1	35	2	2	2	1	2	2	175	85	27.76	146	87	93	83	5.52	7.92	2.23	6.31	3.89	1.3	448	5.4	54.1	53.91	277	118.5	1326	1	0	NA	0	0	0	0	1	0.45	0.21	5.14	11.19	2.17166	17.0136	190.38	99.36	142.56
1421	A	2	59	1	2	2	7	3	3	148	39	17.8	92	68	66	91	5.77	10.02	1.33	6.15	2.98	2.2	349	6	46.4	9.11	51.04	15.66	157.8	0	0	NA	0	0	0	0	1	0.58	0.32	5.6	10.08	15.5562	2.24838	22.6561	103.86	180.36
1422	A	1	50	2	2	2	7	2	1	175	89	29.06	123	75	102	68	5.48	6.6	1.99	7.05	4.52	1.48	629	5.3	42.5	35.91	116.3	105	218.1	1	0	NA	0	0	0	0	0	0.34	0.53	3.24	2.08	5.16407	15.0754	31.3137	98.64	118.8
1423	A	2	27	2	2	3	7	3	3	149	44	19.82	104	56	63	92	4.27	5.97	0.44	5.61	2.77	1.83	381	4.5	27.8	4.31	52.05	15.74	212.3	0	0	NA	0	0	0	0	0	0.27	0.25	12.08	13.49	19.5347	2.25987	30.481	76.86	107.46
1424	A	2	60	2	2	2	7	3	2	162	66	25.15	156	93	80	82	9.78	8.17	1.52	5.07	2.86	1.32	341	7	41.3	18.19	47.04	73.57	78.86	0	1	NA	0	1	1	0	0	0.25	0.6	2.59	1.07	5.51558	10.5628	11.3223	176.04	147.06
1425	A	2	34	2	2	3	7	2	1	158	52	20.83	87	71	67	89	4.96	5.3	1.66	6.45	3.94	1.59	237	4.9	30.1	9.05	74.05	37.72	384	0	0	NA	0	0	0	0	0	0.24	0.19	8.18	10.18	8.60134	5.41565	55.1328	89.28	95.4
1426	A	1	38	2	2	2	7	3	2	177	75	23.94	106	65	83	84	5.37	9.12	0.93	4.36	2.3	1.18	477	5.4	63	7.22	103.8	36.22	566.2	1	0	NA	0	0	0	0	1	0.2	0.18	14.38	15.63	5.93927	5.20029	81.2922	96.66	164.16
1427	A	1	63	2	2	2	1	1	1	155	58	24.14	216	122	93	NA	5.09	11.01	2.28	5.49	2.94	1.48	698	5.6	70	11.41	193.7	40.77	446.7	1	0	NA	0	0	0	0	1	0.28	0.43	16.98	10.96	6.06405	5.85355	64.135	91.62	198.18
1428	A	2	61	2	2	1	1	3	2	148	63	28.76	160	106	92	88	5.88	6.68	0.92	8.1	5.44	1.66	358	5.6	39	5.66	79.38	63.89	214.1	0	0	NA	0	0	0	0	0	0.09	0.37	14.02	3.35	6.75716	9.17301	30.7394	105.84	120.24
1429	A	1	32	2	2	2	7	2	2	168	69	24.45	126	84	87	60	4.98	8.23	1.8	4.57	2.24	1.43	397	5.2	32.4	12.25	109.7	45.44	1014	0	0	NA	0	0	0	0	1	0.27	0.11	8.96	22.32	4.34866	6.52405	145.585	89.64	148.14
1430	A	2	47	1	2	2	7	2	2	152	50	21.64	119	73	75	82	5.47	9.41	0.79	6.39	3.56	2	275	5.5	36.1	7.94	118.4	66	1114	0	0	NA	0	0	0	0	1	0.12	0.11	14.91	16.88	3.07376	9.47595	159.943	98.46	169.38
1431	A	1	31	2	2	NA	7	3	2	160	67	26.17	147	99	83	79	4.91	7.67	1.69	4.53	2.48	1.3	480	4.4	47.4	3.19	110.1	84.55	1291	1	0	NA	0	0	0	0	0	0.04	0.09	34.51	15.27	2.88737	12.1393	185.355	88.38	138.06
1432	A	1	44	2	1	2	6	3	3	160	54	21.09	126	95	76	84	5.97	9.14	3.47	5.78	2.96	1.38	411	5.5	42.5	12.54	62.5	37	240.1	0	0	NA	0	0	0	0	1	0.34	0.26	4.98	6.49	8.04711	5.31228	34.4724	107.46	164.52
1433	A	2	40	2	2	2	1	3	3	152	43	18.61	117	77	64	94	5.19	5.37	0.93	4.28	2.52	1.3	316	4.9	34.9	2.62	66.06	34.6	407.6	0	0	NA	0	0	0	0	0	0.08	0.16	25.21	11.78	8.45115	4.9677	58.5212	93.42	96.66
1434	A	2	45	2	2	2	7	3	2	150	47	20.89	131	74	68	83	5.8	6.99	1.13	4.78	2.25	1.79	283	5.3	49.5	4.14	64.93	22.09	234.5	0	0	NA	0	0	0	0	0	0.19	0.28	15.68	10.62	11.9347	3.17157	33.6683	104.4	125.82
1435	A	2	45	2	2	2	7	2	2	149	44	19.82	160	111	76	100	6.12	7.86	11.3	4.28	0.98	0.64	446	5.5	33.3	11.23	99.52	72.27	1852	1	0	NA	0	0	0	0	1	0.16	0.05	8.86	25.63	2.24356	10.3762	265.901	110.16	141.48
1436	A	2	62	2	2	1	7	3	2	164	67	24.91	130	87	93	67	6.15	15.56	3.81	5.61	2.74	0.99	622	5.8	51.8	4.04	206.3	65.85	945.5	1	1	NA	0	0	0	0	0	0.06	0.22	51.06	14.36	2.59527	9.45441	135.75	110.7	280.08
1437	A	2	55	2	2	2	1	3	2	156	69	28.35	127	75	91	83	6.15	11.39	2.11	6.12	3.68	1.24	289	6	40.8	10.74	105.1	100.2	840.6	0	1	NA	0	0	0	0	0	0.11	0.13	9.79	8.39	2.42685	14.3862	120.689	110.7	205.02
1438	A	2	51	2	2	2	7	3	2	159	61	24.13	101	69	83	76	5.62	7.05	1.43	5.76	3.57	1.48	438	5.5	31.8	13.55	123.3	140.9	998.1	1	0	NA	0	0	0	0	0	0.1	0.12	9.1	7.08	2.28931	20.2297	143.302	101.16	126.9
1439	A	2	28	2	2	2	1	2	2	157	48	19.47	103	70	61	93	4.85	4.44	0.57	5.16	2.71	1.62	275	5.1	41.1	5.9	51.67	36.75	192.2	0	0	NA	0	0	0	0	0	0.16	0.27	8.76	5.23	12.569	5.27638	27.5951	87.3	79.92
1440	A	2	64	2	2	2	7	1	1	145	58	27.59	110	73	85	85	7.65	18.36	1.62	7.69	4.49	1.72	535	6.5	45.2	13.06	94.4	69.45	548.7	1	1	NA	0	1	0	0	0	0.19	0.17	7.23	7.9	2.64786	9.97128	78.7796	137.7	330.48
1441	A	1	65	2	2	2	7	3	3	165	67	24.61	132	77	90	69	5.29	8.22	2.41	7.62	4.64	1.36	432	5.3	63.9	8.22	176.7	43.54	363.1	1	0	NA	0	0	0	0	1	0.19	0.49	21.5	8.34	6.87977	6.25126	52.1321	95.22	147.96
1442	A	1	49	2	2	2	3	3	3	166	67	24.31	124	83	90	77	4.55	9.55	2.02	6.4	3.74	1.27	457	5.2	44.5	2.46	114.1	19.87	1102	1	0	NA	0	0	0	0	1	0.12	0.1	46.38	55.46	6.47132	2.85284	158.22	81.9	171.9
1443	A	2	28	1	2	2	1	3	2	149	53	23.87	119	77	74	100	5.13	5.95	0.99	4	1.98	1.47	323	5.1	24.1	2.32	37.62	45.08	416.4	0	0	NA	0	0	0	0	0	0.05	0.09	16.22	9.24	7.11675	6.47236	59.7846	92.34	107.1
1444	A	2	30	2	2	2	1	2	2	152	37	16.01	123	75	61	91	4.78	4.98	0.6	4.66	2	1.95	208	4.8	39.5	3.42	70.03	16.41	265.3	0	0	NA	0	0	0	0	0	0.21	0.26	20.48	16.17	16.6642	2.35607	38.0905	86.04	89.64
1445	A	2	27	2	2	3	7	3	3	152	52	22.51	99	73	70	81	5.1	9.29	1.35	4.48	2.35	1.51	283	4.8	28.5	4.24	266.9	70.9	1119	0	0	NA	0	0	0	0	1	0.06	0.24	62.95	15.78	3.11017	10.1795	160.66	91.8	167.22
1446	A	1	72	2	1	3	2	3	1	174	77	25.43	94	60	100	90	10.25	17.55	1.63	6.81	3.9	1.54	490	9.7	41.1	15.98	54.83	33.29	125.6	1	1	NA	0	1	1	0	0	0.48	0.44	3.43	3.77	6.30361	4.77961	18.033	184.5	315.9
1447	A	2	69	2	2	1	1	2	2	154	51	21.5	117	73	81	90	7.76	10.64	2.22	9.59	5.56	1.64	300	6.3	35.7	3.48	138.7	56.91	793.9	0	1	NA	0	0	0	0	0	0.06	0.17	39.86	13.95	2.94326	8.17085	113.984	139.68	191.52
1448	A	1	61	2	2	2	1	2	1	166	58	21.05	148	96	73	65	5.48	6.53	1.45	4.84	1.94	1.88	478	5.4	53.2	9.15	189.7	16.53	354.8	1	0	NA	0	0	0	0	0	0.55	0.53	20.73	21.46	12.1759	2.3733	50.9404	98.64	117.54
1449	A	2	57	2	2	1	1	2	2	162	83	31.63	144	78	95	75	5.32	8.39	1.05	5.61	3.22	1.44	518	5.7	40.4	6.57	57.55	73.5	463.3	1	0	NA	0	0	0	0	1	0.09	0.12	8.76	6.3	4.56199	10.5528	66.5183	95.76	151.02
1450	A	2	60	2	2	2	7	3	2	150	44	19.56	125	79	70	69	5.5	10.99	0.58	8.26	3.04	3.34	224	5.7	33.8	6.28	74.42	21.51	414.8	0	0	NA	0	0	0	0	1	0.29	0.18	11.85	19.28	8.38821	3.0883	59.5549	99	197.82
1451	A	2	51	2	2	2	1	3	3	162	63	24.01	115	83	80	70	5.71	8.71	0.28	6.72	3.54	2	356	5	26.3	3.43	73.47	43.15	469.6	0	0	NA	0	0	0	0	1	0.08	0.16	21.42	10.88	5.7337	6.19526	67.4228	102.78	156.78
1452	A	2	28	2	2	3	7	3	2	151	50	21.93	100	70	70	85	5.03	6.17	1.2	4.83	2.54	1.52	315	5.1	30.4	2.52	54.7	10.52	213.3	0	0	NA	0	0	0	0	0	0.24	0.26	21.71	20.28	21.2485	1.51041	30.6246	90.54	111.06
1453	A	2	31	2	2	3	7	3	3	153	39	16.66	96	66	58	77	4.79	5.64	0.76	4.23	1.92	1.63	257	5	40.8	4.72	129	33.84	856.2	0	0	NA	0	0	0	0	0	0.14	0.15	27.33	25.3	6.30883	4.85858	122.929	86.22	101.52
1454	A	2	32	2	2	2	7	3	2	155	59	24.56	117	75	77	104	4.84	6.79	1.65	4.23	2.37	1.31	374	4.7	31.4	2.7	68.4	72.93	334.9	0	0	NA	0	0	0	0	0	0.04	0.2	25.33	4.59	5.98099	10.4709	48.0833	87.12	122.22
1455	A	2	59	2	2	2	7	3	3	147	51	23.6	111	67	71	81	5.38	8.8	2.31	4.86	2.08	1.65	368	4.8	29.1	6.61	121.7	56.22	741.1	0	0	NA	0	0	0	0	1	0.12	0.16	18.41	13.18	4.18492	8.07179	106.403	96.84	158.4
1456	A	2	52	2	2	NA	1	3	3	142	46	22.81	108	73	70	70	4.95	7.67	2.05	4.99	2.23	1.59	341	4	30.8	10.59	119.9	44.11	445.1	0	0	NA	0	0	0	0	0	0.24	0.27	11.32	10.09	6.66546	6.33309	63.9052	89.1	138.06
1457	A	2	31	2	2	3	7	3	1	158	43	17.22	91	71	63	102	5.17	6.63	5.52	3.24	3.24	1.58	338	4.9	28.4	2.64	135.9	24.24	2282	0	0	NA	0	0	0	0	0	0.11	0.06	51.48	94.14	4.19058	3.48026	327.638	93.06	119.34
1458	A	1	55	2	2	2	7	3	3	165	68	24.98	118	77	89	91	5.28	10.48	2.49	5.25	2.9	1.17	426	5.2	47.4	2.9	179.8	58.58	1938	1	0	NA	0	0	0	0	1	0.05	0.09	62	33.08	2.48065	8.41062	278.248	95.04	188.64
1459	A	2	53	2	2	2	1	2	2	150	67	29.78	137	81	91	109	7.73	17.49	2.14	6.01	4.09	0.93	592	7.2	42.1	39.27	214.6	187.3	923.9	1	1	NA	0	1	1	0	0	0.21	0.23	5.46	4.93	1.21493	26.8916	132.649	139.14	314.82
1460	A	2	51	2	2	2	6	1	2	147	64	29.62	135	86	91	76	5.31	7.78	2.98	6.67	3.13	1.17	415	5.6	48.2	2.25	98.64	56.3	760.8	1	0	NA	0	0	0	0	0	0.04	0.13	43.84	13.51	4.32783	8.08327	109.232	95.58	140.04
1461	A	1	52	2	2	3	1	2	2	161	63	24.3	140	94	86	82	5.83	10.49	1.52	7.47	5.02	1.51	454	5.3	66.9	2.64	253	57.37	1870	1	0	NA	0	0	0	0	1	0.05	0.14	95.83	32.6	2.38594	8.2369	268.485	104.94	188.82
1462	A	1	43	2	2	2	6	2	2	164	68	25.28	125	88	81	63	5.05	6.03	3.36	6.59	3.39	1.26	486	5.3	33.3	3.73	72.62	64.86	605.7	1	0	NA	0	0	0	0	0	0.06	0.12	19.47	9.34	4.96085	9.31228	86.9634	90.9	108.54
1463	A	1	28	2	2	2	7	1	3	174	75	24.77	118	69	85	90	5.09	12.66	2.41	5.38	2.99	1.26	546	5.2	36.5	1.83	98.95	33.3	1369	1	1	NA	0	0	0	0	0	0.05	0.07	54.07	41.11	3.76771	4.78105	196.554	91.62	227.88
1464	A	1	63	2	2	2	1	3	2	162	57	21.72	144	78	85	87	7.93	14.14	2.25	5.12	2.4	1.55	394	6.2	57.1	4.81	97.91	54.58	194	0	1	NA	0	0	0	0	0	0.09	0.5	20.36	3.55	5.02217	7.83632	27.8536	142.74	254.52
1465	A	2	63	2	2	2	7	3	1	167	71	25.46	173	95	96	67	5.4	6.31	1.79	6.27	3.86	1.47	288	5.7	34.1	9.14	96.55	66.16	499.8	0	0	NA	0	0	0	0	0	0.14	0.19	10.56	7.55	5.02936	9.49892	71.7588	97.2	113.58
1466	A	2	36	2	2	2	7	3	3	174	80	26.42	131	87	96	87	5.28	5.15	0.58	5.07	2.48	1.85	201	5.1	34.4	3.63	51.87	36.97	438	0	0	NA	0	0	0	0	0	0.1	0.12	14.29	11.85	7.86976	5.30797	62.8859	95.04	92.7
1467	A	1	42	2	2	2	7	3	3	176	86	27.76	130	74	97	60	5.02	7.84	1.44	2.74	1.14	1.1	356	5.1	41.7	3.29	152	57.93	781.8	0	0	NA	0	0	0	0	1	0.06	0.19	46.2	13.5	4.36701	8.3173	112.247	90.36	141.12
1468	A	2	53	2	2	2	7	3	3	152	47	20.34	108	69	74	72	5.32	5.33	0.71	4.88	2.23	1.66	320	4.6	32.7	2.47	78.97	20.01	248.9	0	0	NA	0	0	0	0	0	0.12	0.32	31.97	12.44	14.0159	2.87294	35.7358	95.76	95.94
1469	A	2	53	2	2	2	7	3	3	153	60	25.63	112	75	80	60	5.1	6.62	2.21	5.06	2.79	1.49	352	5.2	35.6	4.75	72.93	28.76	202.8	0	0	NA	0	0	0	0	0	0.17	0.36	15.35	7.05	12.266	4.12922	29.117	91.8	119.16
1470	A	2	61	2	2	2	7	3	3	153	72	30.76	146	78	95	76	5.85	11.24	2.57	5.81	3.58	1.18	545	6	25.5	15.39	227	85.9	1668	1	1	NA	0	0	0	0	0	0.18	0.14	14.75	19.42	1.99403	12.3331	239.483	105.3	202.32
1471	A	2	37	2	2	3	7	3	2	158	62	24.84	111	75	80	75	5.18	7.38	1.68	5.93	3.83	1.22	402	5.4	40	2.55	90.71	35.81	599.5	0	0	NA	0	0	0	0	0	0.07	0.15	35.57	16.74	6.36098	5.14142	86.0732	93.24	132.84
1472	A	2	32	1	2	2	1	3	3	153	52	22.21	102	69	68	80	5.36	5.78	1.37	4.74	1.97	1.48	259	5.1	27.8	2.32	43.34	8.27	234.1	0	0	NA	0	0	0	0	0	0.28	0.19	18.68	28.31	22.3698	1.18737	33.6109	96.48	104.04
1474	A	1	42	1	2	2	1	1	1	159	68	26.9	95	70	81	56	4.8	4.6	1.88	4.57	2.6	1.21	455	5.1	39.6	18.69	94.83	42.85	486.4	1	0	NA	0	0	0	0	0	0.44	0.19	5.07	11.35	7.65047	6.15219	69.8349	86.4	82.8
1475	A	2	53	1	2	2	7	2	2	171	65	22.23	110	70	84	78	5.2	7.8	2.87	6	3.36	1.26	342	6	44.4	39.4	118.33	124.5	1777	0	0	NA	0	0	0	0	1	0.32	0.07	3	14.27	1.93452	17.8751	255.133	93.6	140.4
1476	A	2	46	2	2	2	1	3	2	160	65	25.39	105	81	80	95	5.8	7.5	1.72	6.36	3.71	1.78	354	5.6	37	16.41	79.68	28.36	390.3	0	0	NA	0	0	0	0	0	0.58	0.2	4.86	13.76	8.08639	4.07179	56.0373	104.4	135
1478	A	1	49	2	2	2	7	3	3	167	62	22.23	145	105	84	88	5.2	6.6	2.8	5.99	3.56	1.42	313	5.9	70	33.15	161.66	56.67	445.5	0	0	NA	0	0	0	0	0	0.58	0.36	4.88	7.86	5.85644	8.1364	63.9627	93.6	118.8
1479	A	2	49	2	2	1	1	2	2	150	62	27.56	147	104	80	80	5.5	5.5	2.02	6.21	3.6	1.71	278	5.1	37.9	16.31	85.35	78.87	562.5	0	0	NA	0	0	0	0	0	0.21	0.15	5.23	7.13	4.42375	11.3238	80.7609	99	99
1480	A	2	49	2	2	2	3	3	2	168	86	30.47	104	72	99	84	5.4	6.3	2.04	6.36	3.9	1.55	292	5.9	35	18.89	71.83	129.6	1270	0	0	NA	0	0	0	0	0	0.15	0.06	3.8	9.8	2.28604	18.6073	182.34	97.2	113.4
1481	A	2	54	1	2	2	1	2	2	162	62	23.62	105	63	81	59	4.4	3.8	0.45	6.48	2.54	2.84	274	5.5	42.2	12.69	54.95	48.3	257.6	0	0	NA	0	0	0	0	0	0.26	0.21	4.33	5.33	10.5994	6.93467	36.9849	79.2	68.4
1482	A	2	51	2	1	3	7	2	2	160	55	21.48	122	83	74	104	6.9	14.8	1.3	4.31	2.32	1.33	267	7.5	49	15.87	83.74	73.1	403	0	1	NA	0	1	1	0	0	0.22	0.21	5.28	5.51	3.39013	10.4953	57.8607	124.2	266.4
1483	A	2	56	2	2	1	3	2	2	157	53	21.5	131	80	76	62	5	8	1.53	6.47	3.89	1.66	298	5.7	38.7	24.12	114.9	114.7	561.5	0	0	NA	0	0	0	0	1	0.21	0.2	4.76	4.9	3.44669	16.4681	80.6174	90	144
1484	A	2	54	2	2	2	7	3	3	152	55	23.81	114	81	80	79	5	6.1	1.64	6.35	3.99	1.52	322	5.6	39.8	17.96	73.57	66.07	222.6	0	0	NA	0	0	0	0	0	0.27	0.33	4.1	3.37	7.52193	9.486	31.9598	90	109.8
1485	A	2	35	2	2	2	7	3	2	146	41	19.23	109	75	61	88	4.9	5.1	0.73	4.94	1.71	2.41	224	5	41.1	11.22	56.95	68.26	606.3	0	0	NA	0	0	0	0	0	0.16	0.09	5.08	8.88	5.15213	9.80043	87.0495	88.2	91.8
1486	A	2	52	2	2	2	1	2	2	159	58	22.94	105	71	70	81	5.1	5.8	1.73	4.99	2.45	1.61	219	5.1	29.3	14.25	60.79	31.59	186.2	0	0	NA	0	0	0	0	0	0.45	0.33	4.27	5.89	12.5137	4.53553	26.7337	91.8	104.4
1487	A	2	55	2	1	2	7	2	2	153	45	19.22	113	58	71	75	7.4	17.5	2.02	6.37	4.28	1.21	274	10.2	26.9	3.06	12.2	17.16	57.85	0	1	NA	0	1	1	0	0	0.18	0.21	3.99	3.37	15.8908	2.46375	8.30581	133.2	315
1488	A	2	55	2	2	2	3	3	2	160	44	17.19	118	71	67	93	5.6	9.2	1.29	4.53	2.38	1.54	292	6.1	29.8	23.61	109.2	48.27	315	0	0	NA	0	0	0	0	1	0.49	0.35	4.63	6.53	6.41949	6.93037	45.2261	100.8	165.6
1489	A	2	53	2	1	2	1	2	2	159	61	24.13	110	67	84	81	15.9	26.5	4.32	4.99	2.35	1.17	248	12.2	29.7	14.3	31.73	23.33	125.1	0	1	NA	0	1	1	0	0	0.61	0.25	2.22	5.36	5.06499	3.34961	17.9612	286.2	477
1490	A	2	53	2	2	3	7	3	3	149	55	24.77	124	87	89	76	5.4	6.8	0.79	4.78	2.44	1.67	313	6	35.4	11.96	34.55	55	278.1	0	0	NA	0	0	0	0	0	0.22	0.12	2.89	5.06	7.04422	7.89663	39.9282	97.2	122.4
1491	A	1	52	2	1	2	7	3	2	159	60	23.73	137	98	86	98	5.5	5.8	12.3	7.06	0.91	1.09	455	6	41.3	35.95	112.2	125	449.4	1	0	NA	0	0	0	0	0	0.29	0.25	3.12	3.6	3.6635	17.9469	64.5226	99	104.4
1492	A	1	50	2	2	3	7	3	3	168	65	23.03	122	69	78	71	5.6	4.8	1.05	6.91	4.13	1.86	385	5.7	67.1	15.06	34.98	61.6	1	0	0	NA	0	0	0	0	0	0.24	34.98	2.32	0.02	16.3302	8.84422	0.143575	100.8	86.4
1493	A	2	28	2	2	2	1	2	2	161	46	17.75	104	69	62	73	5	5.4	1.24	4.63	2.01	1.91	199	5.4	36	9.78	31.05	55.47	163.5	0	0	NA	0	0	0	0	0	0.18	0.19	3.17	2.95	9.73768	7.96411	23.4745	90	97.2
1494	A	1	24	2	2	3	7	3	3	166	74	26.85	121	73	95	90	5.3	10.6	3.38	6.67	4.08	1.15	378	5.8	38.6	59.4	247.6	181.7	2062	0	0	NA	0	0	0	0	1	0.33	0.12	4.17	11.35	1.32033	26.0876	296.052	95.4	190.8
1495	A	1	26	2	2	3	7	3	3	160	50	19.53	118	71	70	82	5	5.6	0.84	5.74	3.32	1.7	357	5.2	59.6	13.38	46.24	33.67	99.81	0	0	NA	0	0	0	0	0	0.4	0.46	3.46	2.96	15.8566	4.83417	14.3302	90	100.8
1496	A	1	50	2	2	2	7	3	2	173	62	20.72	109	74	85	81	4.5	5.9	0.57	7.78	3.72	2.38	335	5.4	37.3	10.49	103.6	24.93	601	0	0	NA	0	0	0	0	0	0.42	0.17	9.88	24.11	9.0559	3.57933	86.2886	81	106.2
1497	A	2	37	1	1	2	7	2	2	170	58	20.07	111	72	73	62	7.3	11.4	1.35	4.75	2.58	1.51	314	6.3	36.8	11.16	42.13	26.9	461.3	0	1	NA	0	0	0	0	0	0.41	0.09	3.78	17.15	5.77991	3.86217	66.2312	131.4	205.2
1498	A	2	53	1	2	2	7	3	2	164	71	26.4	153	86	87	70	6.1	7	1.41	6.64	4.3	1.38	350	5.9	37.9	15.36	70.8	46.66	354.9	0	0	NA	0	0	0	1	0	0.33	0.2	4.61	7.61	6.32456	6.69921	50.9548	109.8	126
1499	A	2	55	2	2	2	7	3	3	155	61	25.39	180	80	83	86	6.8	16.1	1.93	7.46	4.75	1.65	366	6.5	36.6	35.6	141.4	89.03	784.2	0	1	NA	0	1	0	0	0	0.4	0.18	3.97	8.81	2.2242	12.7825	112.592	122.4	289.8
1500	A	2	53	2	2	2	1	2	2	160	78	30.47	142	87	103	93	5	6.6	2.71	5.43	3.1	1.48	452	5.7	24.3	31.65	144.1	161	763.6	1	0	NA	0	0	0	0	0	0.2	0.19	4.55	4.74	2.63375	23.1156	109.634	90	118.8
1501	A	2	51	2	2	2	7	3	2	151	52	22.81	138	91	80	70	4.9	6.4	1.46	7.53	4.59	1.86	332	5.7	58	18.58	84.01	48.37	281.8	0	0	NA	0	0	0	0	0	0.38	0.3	4.52	5.83	8.22971	6.94472	40.4594	88.2	115.2
1502	A	1	55	2	2	2	7	3	2	161	59	22.76	136	87	84	68	5.7	5.3	2.37	5.88	2.69	1.8	312	5.3	68.4	15.64	56.07	34.39	150	0	0	NA	0	0	0	0	0	0.45	0.37	3.59	4.36	12.2733	4.93754	21.5363	102.6	95.4
1503	A	2	51	2	2	1	1	2	2	153	53	22.64	157	102	82	82	4.5	5.3	0.67	6.09	4.19	1.31	326	5.6	44.8	19.38	81.7	65.98	646.2	0	0	NA	0	0	0	0	0	0.29	0.13	4.22	9.79	5.37599	9.47308	92.7782	81	95.4
1504	A	1	57	2	2	1	1	2	2	163	65	24.46	165	103	85	90	5.4	10.6	2.53	5.97	3.31	1.42	380	6.2	31.6	13.19	87.72	37.54	957.6	0	0	NA	0	0	0	0	1	0.35	0.09	6.65	25.51	4.30757	5.38981	137.487	97.2	190.8
1505	A	2	54	2	2	2	1	2	2	152	51	22.07	135	86	80	95	5.1	7.2	2.24	8.06	5.22	1.71	336	5.5	37.4	13.96	91.35	74.57	615.8	0	0	NA	0	0	0	0	0	0.19	0.15	6.54	8.26	4.30644	10.7064	88.4135	91.8	129.6
1506	A	2	26	2	2	2	1	2	2	150	38	16.89	103	70	60	92	4.7	4.2	0.77	5.08	2.7	1.66	262	5	37.7	9.93	61.46	3.16	489.5	0	0	NA	0	0	0	0	0	3.14	0.13	6.19	154.91	30.3262	0.453697	70.28	84.6	75.6
1507	A	2	56	2	2	2	1	2	3	155	43	17.9	107	73	72	91	4.7	5.7	1.56	4.11	2.03	1.4	239	5.1	58	9.01	38.58	70.35	600.9	0	0	NA	0	0	0	0	0	0.13	0.06	4.28	8.54	5.09376	10.1005	86.2742	84.6	102.6
1508	A	1	25	2	2	2	7	3	2	160	64	25	135	91	82	80	5.1	6.3	3.63	5.09	2.76	1.21	518	5.6	35.5	35	89.94	133	2433	1	0	NA	0	0	0	0	0	0.26	0.04	2.57	18.29	1.73735	19.0955	349.318	91.8	113.4
1509	A	1	55	2	2	2	1	3	3	166	56	20.32	132	80	77	63	5.5	5.8	1.01	6.08	3.42	1.87	248	5.5	42.1	12.83	35.59	38.66	148.7	0	0	NA	0	0	0	0	0	0.33	0.24	2.77	3.85	11.5342	5.55061	21.3496	99	104.4
1510	A	2	59	2	2	2	7	2	2	157	62	25.15	132	89	84	69	5.7	6	1.68	6.23	3.8	1.48	363	5.9	52.6	54.05	210.9	130.9	919.8	0	0	NA	0	0	0	0	0	0.41	0.23	3.9	7.03	2.55528	18.794	132.06	102.6	108
1511	A	1	59	2	2	2	7	3	2	160	72	28.13	126	74	95	90	4.6	7.6	4.13	5.73	3.27	1.04	486	5.9	32.6	27.6	162.8	96.68	564.9	1	0	NA	0	0	0	0	0	0.29	0.29	5.9	5.84	4.0847	13.8808	81.1055	82.8	136.8
1512	A	2	31	2	2	2	1	1	2	151	44	19.3	96	76	65	78	4.4	2.9	0.91	4.38	2.58	1.29	327	5.2	33.1	10.29	46.48	23.9	141.6	1	0	NA	0	0	0	0	0	0.43	0.33	4.52	5.92	21.7117	3.43144	20.3302	79.2	52.2
1513	A	2	55	2	2	2	7	3	3	156	55	22.6	120	87	82	82	5.8	5.1	2.45	5.79	3.37	1.41	288	5.7	36.5	17.16	74.37	83.29	468.2	0	0	NA	0	0	0	0	0	0.21	0.16	4.33	5.62	4.54136	11.9584	67.2218	104.4	91.8
1514	A	2	33	2	2	3	7	3	3	154	50	21.08	136	78	75	74	4.5	6.1	2.65	4	1.82	1.4	267	5.1	31.5	15.17	76.45	61.23	796.3	0	0	NA	0	0	0	0	0	0.25	0.1	5.04	13.01	4.89004	8.7911	114.329	81	109.8
1515	A	1	35	2	2	2	1	3	2	187	74	21.16	113	80	82	75	4.5	4.5	2.46	4.34	2.04	1.58	370	5.3	64.8	15.39	57.4	24.22	62.19	0	0	NA	0	0	0	0	0	0.64	0.92	3.73	2.57	26.5817	3.47739	8.92893	81	81
1516	A	2	54	2	2	1	1	2	2	153	63	26.91	133	84	80	95	6.1	8.1	1.09	5.25	2.59	1.76	393	6	33	19.65	75.02	87.51	520.4	0	0	NA	0	0	0	0	1	0.22	0.14	3.82	5.95	3.60513	12.5642	74.7164	109.8	145.8
1517	A	1	57	2	2	2	1	2	2	162	75	28.58	155	101	93	91	5.8	6.6	3.03	5.42	3.13	1.39	415	5.6	37.9	19.58	109.4	94.04	389.4	0	0	NA	0	0	0	0	0	0.21	0.28	5.59	4.14	4.27983	13.5018	55.9081	104.4	118.8
1518	A	2	52	2	2	2	7	3	2	152	50	21.64	111	77	82	93	4.4	9.1	1.68	5.47	3.39	1.3	298	5.6	41.2	13.5	100.4	60.38	654.7	0	0	NA	0	0	0	0	1	0.22	0.15	7.44	10.84	4.83238	8.66906	93.9986	79.2	163.8
1519	A	1	53	2	2	2	7	3	3	169	72	25.21	128	84	91	60	5.9	6.8	1.93	5.54	3.18	1.37	409	5.2	51.2	16.96	79.66	37.44	222	0	0	NA	0	0	0	0	0	0.45	0.36	4.7	5.93	9.07119	5.37545	31.8737	106.2	122.4
1520	A	1	31	2	2	3	7	1	3	167	67	24.02	113	77	83	85	5.1	6.7	1.42	4.51	2.79	1.12	544	5.1	46.3	21.05	92.66	68.78	694.3	1	0	NA	0	0	0	0	0	0.31	0.13	4.4	10.09	4.35448	9.87509	99.6841	91.8	120.6
1521	A	1	48	2	2	2	7	3	3	156	48	19.72	111	76	77	90	7.3	6.7	6.31	4.67	0.82	1.31	370	5	70	14.07	54.48	39.47	220.1	0	1	NA	0	0	0	0	0	0.36	0.25	3.87	5.58	7.56297	5.66691	31.6009	131.4	120.6
1522	A	2	34	1	2	3	1	3	3	148	51	23.28	103	69	79	81	5	3.7	1.87	5.92	3.55	1.48	380	5.3	38	9.19	24.36	58.73	45.48	0	0	NA	0	0	0	0	0	0.16	0.54	2.65	0.77	14.9986	8.43216	6.52979	90	66.6
1523	A	2	51	1	2	2	1	2	2	156	54	22.19	126	88	77	74	4.9	9.5	2.4	5.32	3.11	1.44	290	5.7	34.6	11.54	72.48	67.08	929.6	0	0	NA	0	0	0	0	1	0.17	0.08	6.28	13.86	3.56307	9.63101	133.467	88.2	171
1524	A	2	29	2	2	3	7	3	3	155	56	23.31	133	87	72	94	4.7	5.2	1.11	5.7	3.19	1.62	342	5.5	47.7	16.03	47.29	72.25	275.8	0	0	NA	0	0	0	0	0	0.22	0.17	2.95	3.82	7.15439	10.3733	39.598	84.6	93.6
1525	A	2	26	2	2	2	7	2	2	156	56	23.01	105	69	71	98	4	3.4	2.29	6.33	3.5	1.83	326	5.5	20.9	20.41	134.9	56.1	193.7	0	0	NA	0	0	0	0	0	0.36	0.7	6.61	3.45	12.0159	8.05456	27.8105	72	61.2
1526	A	1	53	2	2	2	7	3	2	168	72	25.51	120	73	88	104	7.1	8.6	1.06	4.87	2.97	1.3	314	8.2	60.4	21.4	67.16	58.94	258	0	1	NA	0	1	1	0	0	0.36	0.26	3.14	4.38	5.36298	8.46231	37.0424	127.8	154.8
1527	A	2	27	2	2	2	1	2	2	160	74	28.91	109	84	82	106	5.2	6.9	2.3	5.34	3.05	1.43	376	5.4	25.9	27.92	137.2	123.8	1373	0	0	NA	0	0	0	0	0	0.23	0.1	4.91	11.09	2.26643	17.7746	197.128	93.6	124.2
1528	A	2	38	2	2	2	1	2	2	153	52	22.21	114	92	68	85	5.1	4.8	0.63	4.99	2.52	1.81	323	5.1	35.5	14.63	56.3	54.01	193.9	0	0	NA	0	0	0	0	0	0.27	0.29	3.85	3.59	9.41221	7.75449	27.8392	91.8	86.4
1529	A	2	34	2	2	2	7	3	3	157	52	21.1	137	87	72	73	4.8	3.3	1.83	4.24	2.21	1.4	291	5.4	39.2	21.64	134.3	53.23	236.2	0	0	NA	0	0	0	0	0	0.41	0.57	6.21	4.44	9.99921	7.6425	33.9124	86.4	59.4
1530	A	1	53	2	1	2	6	2	2	157	58	23.53	140	86	81	73	9.3	18.8	4.2	6.96	3.72	1.42	383	8.4	63.7	83.17	128.9	93.43	181.5	0	1	NA	1	1	1	0	0	0.89	0.71	1.55	1.94	2.98696	13.4142	26.0589	167.4	338.4
1531	A	1	74	2	2	1	1	2	2	161	60	23.15	146	83	86	75	5	15.8	1.96	5.94	3.58	1.42	564	5.7	66.9	59.96	247.5	139.1	2293	1	1	NA	0	0	0	0	0	0.43	0.11	4.13	16.48	1.30469	19.9713	329.218	90	284.4
1532	A	2	60	2	2	2	1	2	2	151	53	23.24	125	82	86	78	4.7	7	1.73	6.39	3.59	1.86	313	6.1	45.3	13.89	50.81	44.85	266.7	0	0	NA	0	0	0	0	0	0.31	0.19	3.66	5.95	8.8286	6.43934	38.2915	84.6	126
1533	A	1	36	2	2	2	1	3	2	170	69	23.88	138	105	83	105	5.3	5.3	8.85	5.93	1.96	0.87	378	5.4	26.1	14.88	38.24	70.61	265.8	0	0	NA	0	0	0	0	0	0.21	0.14	2.57	3.76	6.69916	10.1378	38.1622	95.4	95.4
1534	A	1	60	2	2	2	2	1	1	166	70	25.4	107	86	89	102	5.3	7.1	4.7	7.45	3.51	1.43	536	5.8	54.5	19.1	69.78	134.5	2104	1	0	NA	0	0	0	0	0	0.14	0.03	3.65	15.64	1.73976	19.3108	302.082	95.4	127.8
1535	A	2	27	1	2	2	1	2	2	163	51	19.2	120	75	72	123	5.5	10.6	1.9	4	1.88	1.47	376	5.5	24.2	53.52	280	99.11	1055	0	0	NA	0	0	0	0	1	0.54	0.27	5.23	10.64	2.43166	14.2297	151.472	99	190.8
1536	A	2	67	2	2	2	7	3	2	160	56	21.88	161	118	82	76	7.7	16	1.48	7.33	4.25	1.87	432	6.7	43.2	24.33	56.04	36.35	237.5	1	1	NA	0	1	1	0	0	0.67	0.24	2.3	6.53	5.74183	5.21895	34.0991	138.6	288
1537	A	2	38	1	2	2	1	3	2	152	50	21.64	113	82	65	87	5.3	6.6	1.4	6.05	3.39	1.87	273	5.4	32.2	13.18	59.73	50.06	429.6	0	0	NA	0	0	0	0	0	0.26	0.14	4.53	8.58	6.28862	7.18737	61.6798	95.4	118.8
1538	A	2	30	2	2	2	7	3	2	159	53	20.96	103	75	76	78	5.3	5.9	1.44	4.34	1.81	1.85	273	5.2	36.5	15.04	74.21	43.41	365.9	0	0	NA	0	0	0	0	0	0.35	0.2	4.93	8.43	7.53547	6.23259	52.5341	95.4	106.2
1539	A	1	50	2	2	2	1	2	2	159	71	28.08	111	79	94	76	6.2	13.6	2	5.45	3.36	1.4	493	5.8	41.8	50.98	183.9	84.73	1724	1	1	NA	0	0	0	0	0	0.6	0.11	3.61	20.35	1.7842	12.1651	247.523	111.6	244.8
1540	A	2	62	2	2	2	7	3	3	152	54	23.37	128	76	85	67	5.7	6.1	1.48	5.08	2.75	1.51	417	5.6	36.6	21.05	92.56	70.45	1216	0	0	NA	0	0	0	0	0	0.3	0.08	4.4	17.26	3.13446	10.1149	174.587	102.6	109.8
1541	A	2	34	2	2	2	7	3	3	164	60	22.31	97	62	63	80	4.8	5.9	3.9	3.9	1.89	0.97	346	5.1	27.7	13.18	58.18	104.7	1015	0	0	NA	0	0	0	0	0	0.13	0.06	4.41	9.69	3.15386	15.0323	145.729	86.4	106.2
1542	A	1	54	2	2	2	1	1	2	165	72	26.45	150	99	89	67	5.5	6.4	0.69	5.15	3.01	1.48	478	5.6	34.9	23.8	59.91	45.06	95.61	1	0	NA	0	0	0	0	0	0.53	0.63	2.52	2.12	12.0151	6.46949	13.7272	99	115.2
1543	A	2	30	2	2	2	1	2	2	154	71	29.94	111	76	86	91	5.3	5.3	0.83	4.6	2.77	1.25	292	5.7	31.1	20.27	62.77	223.8	1526	0	0	NA	0	0	0	0	0	0.09	0.04	3.1	6.82	1.64992	32.1321	219.095	95.4	95.4
1544	A	2	39	2	2	3	7	3	3	156	59	24.24	123	76	79	83	5.5	4.7	1.15	6.28	3.66	1.82	311	5.4	44.5	27.21	101.6	103.1	523.6	0	0	NA	0	0	0	0	0	0.26	0.19	3.73	5.08	4.06479	14.8026	75.1759	99	84.6
1545	A	2	36	1	2	2	7	3	1	159	56	22.15	105	74	73	77	5.1	4.6	1.39	4.09	2.06	1.51	300	5.4	33.8	14.41	74.75	45.81	454.1	0	0	NA	0	0	0	0	0	0.31	0.16	5.19	9.91	7.27079	6.57717	65.1974	91.8	82.8
1546	A	1	48	2	2	1	7	3	3	170	70	24.22	151	95	85	88	5.7	9.7	3.09	4.22	2.02	1.26	520	5.8	45.7	24.86	113.8	76.8	1281	1	0	NA	0	0	0	0	1	0.32	0.09	4.58	16.68	2.55789	11.0266	183.92	102.6	174.6
1547	A	2	28	2	2	2	1	2	2	165	72	26.45	118	85	89	95	5.7	7	1.14	4.29	2.42	1.24	378	5.5	33.1	34.58	137.4	205.7	2301	0	0	NA	0	0	0	0	0	0.17	0.06	3.97	11.19	1.26669	29.5334	330.366	102.6	126
1548	A	2	36	2	1	2	1	2	2	159	49	19.38	94	66	71	81	4.9	11.2	1.13	4.88	2.41	1.82	320	5.4	46.6	11.98	55.39	32.46	363	0	1	NA	0	0	0	0	0	0.37	0.15	4.62	11.18	7.69028	4.66045	52.1177	88.2	201.6
1549	A	2	37	2	2	2	7	3	2	152	47	20.34	142	89	68	94	5.5	5.7	1.42	4.53	2.2	1.69	268	5.7	32.4	18.83	47.33	67.75	157.3	0	0	NA	0	0	0	0	0	0.28	0.3	2.51	2.32	7.98535	9.72721	22.5844	99	102.6
1550	A	1	53	1	1	2	2	2	2	170	68	23.53	122	76	86	86	6.7	10.7	3.63	6.95	3.54	1.76	409	7.2	54.7	15.47	69.42	59.85	806.7	0	1	NA	1	1	1	0	0	0.26	0.09	4.49	13.48	3.1473	8.59296	115.822	120.6	192.6
1551	A	1	50	1	2	2	1	1	1	172	65	21.97	124	84	80	77	6.1	10.4	1.76	5.43	3.37	1.18	567	5.5	42.5	20.05	82.28	51.38	915.5	1	0	NA	0	0	0	0	1	0.39	0.09	4.1	17.82	3.46089	7.37688	131.443	109.8	187.2
1552	A	1	34	2	2	2	7	3	2	167	87	31.2	129	93	101	77	6.1	6.3	1.35	4.46	2.65	1.13	441	5.8	57.2	49.66	124.3	214	783.4	1	0	NA	0	0	0	1	0	0.23	0.16	2.5	3.66	1.92602	30.7251	112.477	109.8	113.4
1553	A	2	35	1	2	2	1	2	2	147	50	23.14	112	75	78	93	5.7	10.4	1.16	6.84	4.34	1.66	327	5.3	28.9	13.02	33.7	112	843.9	0	0	NA	0	0	0	0	1	0.12	0.04	2.59	7.53	2.46895	16.0804	121.163	102.6	187.2
1554	A	1	28	2	2	2	1	2	2	178	76	23.99	114	82	84	69	4.7	2.9	2.48	4.97	2.98	1.24	489	5.2	36.3	23.1	58.48	83.37	81.58	1	0	NA	0	0	0	0	0	0.28	0.72	2.53	0.98	11.0418	11.9698	11.7128	84.6	52.2
1555	A	2	26	2	2	2	1	3	2	149	42	18.92	101	71	61	75	4.4	4.7	0.48	4.02	1.91	1.61	289	5.3	24.8	12.81	89.12	28.1	398.2	0	0	NA	0	0	0	0	0	0.46	0.22	6.96	14.17	11.1743	4.03446	57.1716	79.2	84.6
1556	A	2	26	2	2	2	1	2	2	152	40	17.31	102	71	60	86	4.9	4.9	0.87	5.61	2.91	1.84	348	5.5	30.3	14.76	71.36	62.29	284	0	0	NA	0	0	0	0	0	0.24	0.25	4.83	4.56	7.60393	8.94329	40.7753	88.2	88.2
1557	A	1	51	2	2	2	6	3	2	178	76	23.99	114	70	90	69	6.1	4.9	3.5	6.54	3.67	1.36	353	6	43.7	24.42	51.23	71.61	152.3	0	0	NA	0	0	0	1	0	0.34	0.34	2.1	2.13	7.46094	10.2814	21.8665	109.8	88.2
1558	A	1	31	1	2	2	1	2	2	176	67	21.63	111	74	76	84	4.9	6.2	1.82	2.18	3.21	1.31	464	5.4	31.2	18.82	52.69	45.28	236.3	1	0	NA	0	0	0	0	0	0.42	0.22	2.8	5.22	9.29319	6.50108	33.9268	88.2	111.6
1559	A	1	56	2	2	3	1	1	2	161	70	27.01	113	50	93	81	5.4	7	1.73	5.16	2.95	1.71	576	6	39.1	17.61	93.2	100.9	703.7	1	0	NA	0	0	0	0	0	0.17	0.13	5.29	6.97	3.31921	14.4867	101.034	97.2	126
1560	A	1	27	2	2	2	7	3	2	168	69	24.45	105	70	74	74	5.1	5.5	1.8	4.48	2.34	1.46	359	4.9	38.7	21.99	118	73.6	502.2	0	0	NA	0	0	0	0	0	0.3	0.23	5.37	6.82	5.11288	10.5671	72.1034	91.8	99
1561	A	1	43	2	2	3	1	3	3	163	66	24.84	135	90	87	69	4.7	6.3	4.46	5.23	2.81	1.01	378	5.8	46.9	20.08	80.83	68.9	423.8	0	0	NA	0	0	0	0	0	0.29	0.19	4.03	6.15	5.84161	9.89232	60.8471	84.6	113.4
1562	A	2	28	2	2	2	7	3	2	150	52	23.11	111	76	78	79	5.1	6.3	2.08	6.09	3.88	1.47	260	5.1	27.1	17.18	66.96	139.3	918.9	0	0	NA	0	0	0	0	0	0.12	0.07	3.9	6.6	2.64351	20	131.931	91.8	113.4
1563	A	2	24	2	2	2	1	3	2	166	59	21.41	128	75	70	91	5.9	5.7	1.73	7.01	4.18	1.73	290	6.1	24.4	20.57	93.03	66.7	337.7	0	0	NA	0	0	0	0	0	0.31	0.28	4.52	5.06	5.69581	9.57645	48.4853	106.2	102.6
1564	A	2	29	2	2	2	1	3	2	160	43	16.8	129	75	70	94	5.1	3.8	0.93	4.75	2.56	1.55	319	5.5	28.6	17.18	53.5	20.61	246.8	0	0	NA	0	0	0	0	0	0.83	0.22	3.11	11.97	15.4729	2.95908	35.4343	91.8	68.4
1565	A	2	68	2	2	1	234	1	1	152	61	26.4	120	56	85	77	6	9.14	1.53	5.09	3.04	1.32	454	6.2	31.9	27.65	127.4	35.91	213.6	1	0	NA	0	0	0	0	1	0.77	0.6	4.61	5.95	8.57805	5.15578	30.6676	108	164.52
1566	A	1	47	2	2	2	24	3	3	165	56	20.57	110	71	82	86	5.44	6.47	1.92	5.74	3.39	1.3	417	6	40.5	15.54	117.2	30.7	301.3	0	0	NA	0	0	0	0	0	0.51	0.39	7.54	9.81	9.52325	4.40775	43.2592	97.92	116.46
1567	A	1	28	2	2	2	7	2	3	166	81	29.39	112	78	92	75	5.22	8.81	3.24	6.91	4.39	1.27	468	6.5	41.6	54.28	127.4	136.3	754.7	1	0	NA	0	1	0	0	1	0.4	0.17	2.35	5.54	2.59494	19.5693	108.356	93.96	158.58
1568	A	1	26	1	2	2	7	3	1	164	72	26.77	129	88	90	72	5.08	8.67	1.05	5.21	3.46	1.17	375	5.9	46.8	27.49	103.7	105.3	2435	0	0	NA	0	0	0	0	1	0.26	0.04	3.77	23.12	1.79035	15.1184	349.605	91.44	156.06
1569	A	2	26	1	2	2	7	3	2	158	49	19.63	119	85	65	81	4.59	3.52	0.6	3.83	2.09	1.3	253	5.6	39.6	12.54	33.96	19.28	136.9	0	0	NA	0	0	0	0	0	0.65	0.25	2.71	7.1	23.1151	2.76813	19.6554	82.62	63.36
1570	A	1	50	2	1	3	7	3	3	177	68	21.71	109	73	86	100	5.32	3.6	3.89	6.93	3.12	1.52	443	6	33.6	23.01	44.91	63.67	58.44	1	0	NA	0	0	0	0	0	0.36	0.77	1.95	0.92	12.7408	9.14142	8.39052	95.76	64.8
1571	A	2	24	1	2	2	1	1	2	162	68	25.91	113	78	87	77	4.76	6.03	2.05	4.75	2.29	1.51	389	5.4	27.7	15.58	64.62	77.9	559.4	1	0	NA	0	0	0	0	0	0.2	0.12	4.15	7.18	4.84645	11.1845	80.3159	85.68	108.54
1572	A	2	22	1	2	2	7	3	2	163	52	19.57	107	76	72	127	4.9	10.59	0.74	5.3	3.01	1.6	336	5.7	22.9	11.22	61.84	36.03	623.8	0	0	NA	0	0	0	0	1	0.31	0.1	5.51	17.31	5.76112	5.17301	89.5621	88.2	190.62
1573	A	2	22	1	2	2	1	2	2	160	66	25.78	121	77	87	105	5.02	6.62	0.62	4.65	2.59	1.53	312	5.9	28.4	16.07	100.8	90.93	1025	0	0	NA	0	0	0	0	0	0.18	0.1	6.27	11.27	3.17818	13.0553	147.164	90.36	119.16
1574	A	2	26	2	2	2	7	2	2	151	49	21.49	104	77	62	99	5.31	6.49	0.82	5.78	3.5	1.64	397	6	25.8	19.09	84.8	50.51	387.6	0	0	NA	0	0	0	0	0	0.38	0.22	4.44	7.67	6.57219	7.25197	55.6497	95.58	116.82
1575	A	2	34	2	2	2	1	2	2	150	51	22.67	114	74	75	87	5.01	5.84	0.57	4.68	2.74	1.42	284	5.5	35.2	12.77	50.65	41.96	180.4	0	0	NA	0	0	0	0	0	0.3	0.28	3.97	4.3	10.8667	6.02441	25.9009	90.18	105.12
1576	A	1	31	2	2	2	1	2	2	172	60	20.28	112	74	80	75	5.26	3.47	0.76	6.87	3.85	2.08	448	5.7	57.4	11.95	41.5	35.98	94.32	1	0	NA	0	0	0	0	0	0.33	0.44	3.47	2.62	16.6792	5.16583	13.542	94.68	62.46
1577	A	2	64	2	2	2	7	3	3	146	60	28.15	179	88	100	76	5.51	6.69	1.4	3.94	1.78	1.46	303	6	22.1	31.84	132	76.19	667.6	0	0	NA	0	0	0	0	0	0.42	0.2	4.15	8.76	3.96505	10.939	95.8507	99.18	120.42
1578	A	2	30	2	2	2	1	2	2	158	47	18.83	120	82	62	86	4.9	3.28	0.79	4.55	2.12	1.78	306	5.8	19.5	11.71	46.48	29.98	191.7	0	0	NA	0	0	0	0	0	0.39	0.24	3.97	6.39	14.9943	4.30438	27.5233	88.2	59.04
1579	A	1	49	2	2	2	7	3	2	170	67	23.18	143	57	80	59	5.46	4.97	0.75	4.74	2.4	1.71	420	6	58.2	24.24	70.28	41.45	162.5	0	0	NA	0	0	0	0	0	0.58	0.43	2.9	3.92	11.1536	5.95118	23.3309	98.28	89.46
1580	A	2	36	2	2	2	7	2	2	154	53	22.35	121	81	75	89	4.91	6.43	1	4.08	1.71	1.68	235	5.8	38.8	10.49	58.2	58.26	347.4	0	0	NA	0	0	0	0	0	0.18	0.17	5.55	5.96	6.74629	8.36468	49.878	88.38	115.74
1581	A	1	58	2	2	2	1	3	3	177	88	28.09	134	81	96	79	6.38	7.98	10.2	6.17	0.94	1.25	384	6.1	31.3	22.35	73.27	68.52	505.1	0	0	NA	0	0	0	0	1	0.33	0.15	3.28	7.37	4.07822	9.83776	72.5197	114.84	143.64
1582	A	1	29	1	2	2	1	2	2	187	71	20.3	136	82	84	95	5.19	8.07	2.11	6.73	4.18	1.38	432	6	30.7	49.32	195.7	157.2	2864	1	0	NA	0	0	0	0	1	0.31	0.07	3.97	18.22	1.35365	22.57	411.199	93.42	145.26
1583	A	1	30	2	2	1	2	1	1	174	105	34.68	186	110	104	97	6.68	12.19	1.69	5.6	3.54	1.23	737	6.5	39.8	80.72	164.8	160.3	1579	1	1	NA	0	1	0	0	0	0.5	0.1	2.04	9.85	1.30542	23.0151	226.705	120.24	219.42
1584	A	2	61	2	2	2	7	3	3	149	57	25.67	151	58	90	82	5.3	7.17	2.73	4.87	2.54	1.28	359	6	50.8	21.13	103	74.76	766.1	0	0	NA	0	0	0	0	0	0.28	0.13	4.87	10.25	3.79674	10.7337	109.993	95.4	129.06
1585	A	2	37	2	2	2	7	3	2	143	51	24.94	150	96	79	81	4.78	6.99	1.48	6.48	3.52	1.86	319	5.7	31.6	18.38	128.2	82.82	989.4	0	0	NA	0	0	0	0	0	0.22	0.13	6.97	11.95	3.46232	11.8909	142.053	86.04	125.82
1587	A	1	46	1	2	1	1	2	2	165	71	26.08	140	109	87	83	5.59	8.52	3.59	5.56	3.15	1.03	414	5.8	30.3	61.27	151.5	154.5	1472	0	0	NA	0	0	0	0	1	0.4	0.1	2.47	9.53	1.73827	22.1823	211.342	100.62	153.36
1588	A	1	44	2	2	1	4	2	2	166	70	25.4	131	97	88	96	5.14	7.99	2.51	5.03	2.91	1.27	380	5.7	35.6	21.33	96.77	120.8	645.8	0	0	NA	0	0	0	0	1	0.18	0.15	4.54	5.35	3.09561	17.3439	92.7207	92.52	143.82
1589	A	2	32	1	2	2	7	3	1	150	41	18.22	115	80	57	117	5.06	5.07	0.87	6.05	3.51	1.8	318	5.4	30.8	14.88	81.6	43.64	311	0	0	NA	0	0	0	0	0	0.34	0.26	5.48	7.13	8.68885	6.26561	44.6518	91.08	91.26
1590	A	2	68	2	2	1	6	2	2	152	58	25.1	139	85	89	91	5.22	7.05	1.67	5.76	3.45	1.46	336	5.6	25.8	22.78	85.26	91.43	617.9	0	0	NA	0	0	0	0	0	0.25	0.14	3.74	6.76	3.7971	13.1271	88.715	93.96	126.9
1591	A	1	53	2	2	1	1	2	3	173	85	28.4	181	92	96	85	5.36	9.71	1.35	4.91	2.93	1.28	335	6	39.1	38.46	81.04	177.9	3183	0	0	NA	0	0	0	0	1	0.22	0.03	2.11	17.89	1.11359	25.542	456.999	96.48	174.78
1592	A	2	27	1	2	2	1	2	2	153	62	26.49	120	84	79	94	4.83	5.36	3.14	4.86	2.48	1.08	345	5.6	25.5	26.47	60.86	184.9	988.5	0	0	NA	0	0	0	0	0	0.14	0.06	2.3	5.35	2.36824	26.547	141.924	86.94	96.48
1593	A	2	24	1	2	2	1	3	2	159	48	18.99	102	73	64	87	5.29	4.75	1.63	4.26	2.33	1.23	266	5.5	31.7	16.08	70.15	64.85	985.6	0	0	NA	0	0	0	0	0	0.25	0.07	4.36	15.2	4.06856	9.31084	141.508	95.22	85.5
1594	A	1	55	2	2	1	1	2	3	173	83	27.73	126	76	96	72	5.44	7.94	1.14	4.52	2.56	1.25	403	5.9	60.9	17.51	73.64	46.15	266.7	0	0	NA	0	0	0	0	1	0.38	0.28	4.21	5.78	7.54913	6.62599	38.2915	97.92	142.92
1595	A	2	32	2	2	2	7	3	3	157	54	21.91	106	67	74	84	5.06	5.58	0.89	3.49	1.47	1.47	260	5	37.2	16.92	72.74	39.21	248.8	0	0	NA	0	0	0	0	0	0.43	0.29	4.3	6.35	9.925	5.62958	35.7215	91.08	100.44
1596	A	1	70	2	2	1	6	1	2	166	63	22.86	152	82	82	66	5.33	7.58	0.74	5.34	2.78	1.82	315	5	70	13.17	56.59	26.52	115.5	1	0	NA	0	0	0	0	0	0.5	0.49	4.3	4.36	15.2016	3.80761	16.5829	95.94	136.44
1597	A	1	54	2	2	2	6	2	2	168	65	23.03	102	67	81	68	4.85	4.59	1.24	5.45	2.53	1.76	406	5.7	44.1	20.01	108.8	33.44	371.7	0	0	NA	0	0	0	0	0	0.6	0.29	5.44	11.12	9.82621	4.80115	53.3668	87.3	82.62
1598	A	1	70	2	2	2	2	2	2	164	67	24.91	127	67	89	68	5	8.27	1.31	5.51	3.39	1.24	501	6.4	40	50.83	151.8	143.6	783.6	1	0	NA	0	1	0	0	1	0.35	0.19	2.99	5.46	2.60372	20.6174	112.505	90	148.86
1599	A	1	54	2	2	2	1	2	2	166	61	22.14	120	72	82	69	5.1	4.45	0.87	6.43	3.91	1.67	384	5.4	44.4	12.37	25.96	41.23	75.78	0	0	NA	0	0	0	0	0	0.3	0.34	2.1	1.84	15.9652	5.9196	10.8801	91.8	80.1
1600	A	1	59	2	2	2	3	3	2	162	77	29.34	139	102	101	86	6.35	14.47	1.99	6.95	4.45	1.44	465	6.4	57.3	35.39	133.1	86.59	1802	1	1	NA	0	1	0	0	0	0.41	0.07	3.76	20.81	1.66437	12.4322	258.722	114.3	260.46
1601	A	1	27	1	2	2	5	2	2	163	60	22.58	142	79	79	81	5.01	4.98	1.81	4.63	2.67	1.18	360	5.5	40.6	20.19	102.2	75.13	637.6	0	0	NA	0	0	0	0	0	0.27	0.16	5.06	8.49	4.72724	10.7868	91.5434	90.18	89.64
1602	A	2	31	2	2	2	7	3	2	150	60	26.67	121	76	81	92	4.59	6.35	3.01	4.14	1.97	1.07	336	5.1	32.9	19.41	142.9	113	1075	0	0	NA	0	0	0	0	0	0.17	0.13	7.36	9.51	2.98069	16.224	154.343	82.62	114.3
1603	A	1	53	2	2	2	6	1	1	166	56	20.32	133	94	79	83	5.42	5.62	1.35	4.57	2.72	1.11	446	5.9	40.6	20.7	68.66	39.48	324.1	1	0	NA	0	0	0	0	0	0.52	0.21	3.32	8.21	8.35037	5.66834	46.5327	97.56	101.16
1604	A	2	77	2	2	2	6	3	3	150	55	24.44	130	67	88	77	7.06	13.89	1.46	5.85	3.05	1.88	401	6.2	54.2	20.37	79.52	54.83	719.5	0	1	NA	0	0	0	0	0	0.37	0.11	3.9	13.12	3.08825	7.87222	103.302	127.08	250.02
1605	A	1	29	2	2	2	7	3	3	168	61	21.61	120	83	77	84	5.44	7.82	1.4	4.89	2.8	1.34	371	5.8	40.1	14.19	50.75	69.23	508.8	0	0	NA	0	0	0	0	1	0.2	0.1	3.58	7.35	4.55496	9.9397	73.051	97.92	140.76
1606	A	2	25	2	2	2	1	1	1	153	43	18.37	111	60	62	86	4.07	3.88	1.08	3.8	1.99	1.37	387	5.2	30	16.41	78.11	41.77	170.1	1	0	NA	0	0	0	0	0	0.39	0.46	4.76	4.07	14.4621	5.99713	24.4221	73.26	69.84
1607	A	2	31	1	2	2	7	3	3	147	44	20.36	117	79	68	93	5.56	4.61	0.6	4.09	1.84	1.64	359	5.4	27.9	14.47	29.53	52.14	140.1	0	0	NA	0	0	0	0	0	0.28	0.21	2.04	2.69	10.2795	7.486	20.1149	100.08	82.98
1608	A	1	36	1	2	2	1	2	2	162	64	24.39	134	85	86	78	5.17	5.42	2.78	5.85	3.13	1.4	440	5.6	32.2	31.23	122.4	79.88	253	1	0	NA	0	0	0	0	0	0.39	0.48	3.92	3.17	6.4139	11.4688	36.3245	93.06	97.56
1609	A	2	30	2	2	2	7	3	3	145	48	22.83	106	71	74	89	5.69	6.26	0.79	4.03	2.28	1.28	228	5.6	33.1	17	66.49	65.33	596.3	0	0	NA	0	0	0	0	0	0.26	0.11	3.91	9.13	4.51414	9.37976	85.6138	102.42	112.68
1610	A	2	27	2	2	2	7	3	3	158	53	21.23	125	79	76	86	5.39	5.98	3.65	4.11	1.77	1.88	290	5.2	27.5	17.93	63.16	107.2	396.6	0	0	NA	0	0	0	0	0	0.17	0.16	3.52	3.7	4.2538	15.3912	56.9419	97.02	107.64
1611	A	1	27	2	2	2	1	1	1	170	75	25.95	142	75	79	74	5.47	5.79	1.41	4.34	2.56	1.15	478	4.8	38.6	33.16	109.9	94.36	448.1	1	0	NA	0	0	0	0	0	0.35	0.25	3.31	4.75	4.35851	13.5477	64.336	98.46	104.22
1612	A	2	39	2	2	2	7	3	3	137	52	27.71	126	74	76	87	5.33	10.18	0.85	5.45	3.17	1.42	275	5.7	31.9	20.18	91.59	62.18	1145	0	0	NA	0	0	0	0	1	0.32	0.08	4.54	18.41	3.10669	8.92749	164.393	95.94	183.24
1613	A	1	56	2	2	2	1	3	3	171	50	17.1	125	86	82	86	6.31	6.91	2.18	5.29	2.96	1.28	280	5.9	42.4	25.08	34.59	23.03	34.33	0	0	NA	0	0	0	1	0	1.09	1.01	1.38	1.49	23.3129	3.30653	4.92893	113.58	124.38
1614	A	1	26	1	2	2	1	2	2	181	73	22.28	126	86	83	66	5.3	7.91	1.01	5.88	3.92	1.25	378	5.3	43	19.04	66.55	71.04	804.1	0	0	NA	0	0	0	0	1	0.27	0.08	3.5	11.32	3.70936	10.1996	115.449	95.4	142.38
1615	A	1	63	2	2	1	6	2	2	157	67	27.18	133	84	88	75	5.87	10.01	1.9	5.36	3.05	1.32	371	5.6	52.8	17.44	45.02	68.11	248.4	0	0	NA	0	0	0	0	1	0.26	0.18	2.58	3.65	5.45928	9.77889	35.664	105.66	180.18
1616	A	2	26	2	2	2	7	3	3	158	55	22.03	109	61	69	73	4.24	5.56	1.61	5.4	3.26	1.41	342	5.2	25.9	25.73	192.7	67.52	452.8	0	0	NA	0	0	0	0	0	0.38	0.43	7.49	6.71	6.40518	9.69419	65.0108	76.32	100.08
1617	A	1	61	2	2	1	7	3	3	174	95	31.38	141	82	109	57	5.34	7.87	2.68	6.23	3.7	1.23	464	6.2	43.1	22.66	151.1	46.05	848.6	1	0	NA	0	0	0	0	1	0.49	0.18	6.67	18.43	4.53957	6.61163	121.838	96.12	141.66
1618	A	2	36	2	2	2	7	2	3	157	50	20.28	108	67	70	88	4.94	5.74	0.94	4.08	2.17	1.41	261	5.3	34.1	13.9	58.52	45.03	135.1	0	0	NA	0	0	0	0	0	0.31	0.43	4.21	3	11.83	6.46518	19.397	88.92	103.32
1619	A	2	28	2	2	2	7	2	2	160	62	24.22	101	71	74	85	5.01	6.43	0.65	4.93	2.63	1.65	276	5.2	19.1	19.54	105.8	87.49	725.3	0	0	NA	0	0	0	0	0	0.22	0.15	5.41	8.29	3.83335	12.5614	104.135	90.18	115.74
1620	A	1	59	1	2	1	7	3	3	162	63	24.01	160	88	90	81	4.97	7.59	2.88	7.97	5.24	1.32	444	5.9	49.1	24.67	154.2	47.59	462	1	0	NA	0	0	0	0	0	0.52	0.33	6.25	9.71	6.28981	6.83274	66.3317	89.46	136.62
1621	A	2	70	1	2	2	7	3	3	155	53	22.06	146	79	84	93	7.56	5.7	0.82	4.99	2.63	1.65	462	6.8	33.8	20.85	82.81	50.11	252.7	1	1	NA	0	1	1	0	0	0.42	0.33	3.97	5.04	6.27478	7.19454	36.2814	136.08	102.6
1622	A	1	26	2	2	3	7	3	2	173	89	29.74	149	95	97	70	5.44	5.51	1.88	7.12	4.78	1.62	466	5.9	33.3	24.89	98.63	109.1	273.9	1	0	NA	0	0	0	0	0	0.23	0.36	3.96	2.51	4.90524	15.664	39.3252	97.92	99.18
1623	A	2	23	1	2	2	1	2	2	156	47	19.31	99	68	59	94	5.4	5.69	1.57	4.18	1.95	1.66	277	5.5	27.4	18.45	62.13	53.97	137.2	0	0	NA	0	0	0	0	0	0.34	0.45	3.37	2.54	9.84532	7.74874	19.6985	97.2	102.42
1624	A	2	23	2	2	2	7	3	2	153	50	21.36	116	69	67	88	3.79	5.18	0.93	6.6	1.85	3.79	278	5.1	23.6	14.21	134	22.12	775.1	0	0	NA	0	0	0	0	0	0.64	0.17	9.43	35.04	9.99496	3.17588	111.285	68.22	93.24
1625	A	2	23	2	2	2	7	3	3	160	54	21.09	124	100	70	101	5.05	6.36	2.29	5.57	2.9	1.71	228	5.2	23.4	34.35	157.7	66.51	461.8	0	0	NA	0	0	0	0	0	0.52	0.34	4.59	6.94	5.43879	9.54917	66.3029	90.9	114.48
1626	A	2	61	2	2	2	7	3	3	145	45	21.4	131	84	68	85	6.17	6.48	0.84	10	4.33	3.55	269	5.5	67.5	13.2	54.2	46.66	265.5	0	0	NA	0	0	0	1	0	0.28	0.2	4.11	5.69	7.25821	6.69921	38.1192	111.06	116.64
1627	A	1	49	2	2	2	1	2	2	166	77	27.94	132	89	93	83	5.36	9.43	1.53	6.15	2.99	1.43	548	5.5	43.5	22.75	109.5	87.29	2072	1	0	NA	0	0	0	0	1	0.26	0.05	4.81	23.74	2.00205	12.5327	297.487	96.48	169.74
1628	A	2	25	2	2	2	7	3	2	153	44	18.8	103	65	64	83	4.77	7.29	0.98	3.88	1.62	1.63	256	5	25.4	12.19	43.77	64.33	1409	0	0	NA	0	0	0	0	0	0.19	0.03	3.59	21.9	3.31428	9.23618	202.297	85.86	131.22
1629	A	2	37	1	2	2	7	3	2	154	46	19.4	106	74	65	88	5.76	5.42	0.73	3.85	1.46	1.84	295	5.5	36.6	14.02	62.16	45.71	301.5	0	0	NA	0	0	0	0	0	0.31	0.21	4.43	6.6	7.65499	6.56281	43.2879	103.68	97.56
1630	A	2	25	2	2	2	1	2	3	144	36	17.36	116	76	60	96	5.11	7.24	0.67	4.22	1.38	2.13	282	5.3	33.4	15.53	109.7	57.91	866	0	0	NA	0	0	0	0	0	0.27	0.13	7.06	14.95	4.21156	8.31443	124.336	91.98	130.32
1631	A	2	25	2	2	2	7	3	3	156	54	22.19	119	103	70	95	4.78	4.82	2.25	4.41	2.44	1.17	287	5.3	35.9	19.74	89.51	66.86	356	0	0	NA	0	0	0	0	0	0.3	0.25	4.53	5.32	6.79434	9.59943	51.1127	86.04	86.76
1632	A	2	26	2	2	2	1	2	2	152	46	19.91	127	87	66	85	4.96	5.99	0.75	4.48	2.13	1.75	363	5.2	33.1	13.28	97.12	54.09	759.2	0	0	NA	0	0	0	0	0	0.25	0.13	7.31	14.04	5.00668	7.76597	109.002	89.28	107.82
1633	A	1	53	2	2	2	7	3	3	159	60	23.73	120	75	82	73	4.83	6.72	2.72	6.33	3.67	1.36	451	5.6	57.8	12.02	62.21	38.43	185.3	1	0	NA	0	0	0	0	0	0.31	0.34	5.18	4.82	11.1742	5.51759	26.6045	86.94	120.96
1634	A	2	30	2	2	2	7	3	3	155	56	23.31	125	70	71	92	5.11	4.18	0.66	4.27	2.21	1.49	212	5.4	19.4	21.17	96.18	63.75	211.1	0	0	NA	0	0	0	0	0	0.33	0.46	4.54	3.31	8.4854	9.15291	30.3087	91.98	75.24
1635	A	2	37	2	2	2	7	3	3	155	59	24.56	99	66	71	69	5.4	5.6	1.14	4.9	2.91	1.23	319	4.7	35.6	13.18	59.27	57.75	253.3	0	0	NA	0	0	0	0	0	0.23	0.23	4.5	4.39	7.49194	8.29146	36.3676	97.2	100.8
1636	A	2	28	2	2	2	1	2	2	175	56	18.29	114	71	70	75	4.81	6.11	3.54	4.29	2.37	1.47	377	5.2	30.9	12.44	72.75	24.55	484.4	0	0	NA	0	0	0	0	0	0.51	0.15	5.85	19.73	9.55282	3.52477	69.5477	86.58	109.98
1637	A	2	25	2	2	2	7	3	3	154	42	17.71	127	82	62	85	4.69	5.34	0.44	3.24	1.73	1.16	352	5.7	26.8	7.55	42.11	30.31	438.1	0	0	NA	0	0	0	0	0	0.25	0.1	5.58	14.45	9.46969	4.35176	62.9002	84.42	96.12
1638	A	2	39	2	2	2	7	3	2	148	43	19.63	101	74	68	82	4.47	6.72	0.63	4.48	2.31	1.66	227	5.3	30.6	9.64	83.74	18.16	243.1	0	0	NA	0	0	0	0	0	0.53	0.34	8.69	13.39	15.886	2.60732	34.9031	80.46	120.96
1639	A	1	50	2	2	1	7	3	2	159	65	25.71	125	79	90	78	5.7	7.8	2.84	5.73	3.01	1.34	415	6.3	35	20.3	36.36	47.51	249	0	0	NA	0	0	0	0	1	0.43	0.15	1.79	5.24	7.43297	6.82125	35.7502	102.6	140.4
1640	A	2	28	2	2	NA	7	3	3	161	47	18.13	98	72	66	73	4.8	4.6	1.08	4.51	2.27	1.52	170	5.2	35.8	11.22	44.04	25.95	92.5	0	0	NA	0	0	0	0	0	0.43	0.48	3.93	3.56	20.7806	3.72577	13.2807	86.4	82.8
1641	A	1	33	2	2	1	1	3	3	165	84	30.85	173	120	98	76	5.1	8.2	2.24	4.86	2.82	1.19	432	5.4	40.1	44.77	117.48	90.63	482.5	1	0	NA	0	0	0	0	1	0.49	0.24	2.62	5.32	4.12292	13.0122	69.2749	91.8	147.6
1642	A	1	32	2	2	2	2	2	2	164	68	25.28	135	89	87	84	4.7	5.3	3.28	5.23	2.86	1.04	448	5.2	70	46.31	229.8	54.14	412.6	1	0	NA	0	0	0	0	0	0.86	0.56	4.96	7.62	7.10122	7.77315	59.2391	84.6	95.4
1643	A	1	47	NA	1	2	1	3	2	165	70	25.71	136	91	91	80	12.3	16.8	12.1	5.28	0.93	0.86	307	11.9	38.7	21.81	27.42	31.33	47.26	0	1	NA	1	1	1	0	0	0.7	0.58	1.26	1.51	8.24358	4.49821	6.78536	221.4	302.4
1644	A	1	32	2	2	2	7	3	2	171	67	22.91	136	93	80	85	5	8.4	1.91	5.8	3.44	1.35	373	5.8	35.7	24.95	55.64	86.83	508	0	0	NA	0	0	0	0	1	0.29	0.11	2.23	5.85	4.16016	12.4666	72.9361	90	151.2
1645	A	2	36	2	2	2	1	3	2	157	73	29.62	136	91	90	77	5	4.9	2.97	4.85	2.55	1.27	385	5.2	34.7	15.31	44.5	118.6	154.5	0	0	NA	0	0	0	0	0	0.13	0.29	2.91	1.3	6.11185	17.028	22.1823	90	88.2
1646	A	1	57	1	1	1	1	2	2	180	74	22.84	136	83	90	92	6	17.3	0.98	5.13	2.85	1.56	409	5.9	48.4	16.37	126.7	41.67	1659	0	1	NA	0	0	0	0	0	0.39	0.08	7.74	39.81	2.45869	5.98277	238.191	108	311.4
1647	A	2	25	2	2	2	7	3	2	156	48	19.72	124	82	69	93	5.2	5.4	1.36	5.04	2.96	1.36	236	5.5	43.1	13.23	44.3	39.13	119.4	0	0	NA	0	0	0	0	0	0.34	0.37	3.35	3.05	13.2347	5.61809	17.1429	93.6	97.2
1649	A	1	26	2	2	2	7	2	2	171	70	23.94	123	66	78	75	5.3	5.3	2.14	5.24	3.13	1.21	436	5.2	44.1	26.31	120.9	91.41	532.7	1	0	NA	0	0	0	0	0	0.29	0.23	4.6	5.83	4.32275	13.1242	76.4824	95.4	95.4
1651	A	1	35	1	2	2	1	2	2	168	68	24.09	126	82	86	72	5.1	6.6	0.98	6.34	4.49	1.28	481	5.7	53.8	30.85	48.38	69.69	547.5	1	0	NA	0	0	0	0	0	0.44	0.09	1.57	7.86	4.83065	10.0057	78.6073	91.8	118.8
1652	A	2	27	2	2	2	1	2	2	156	47	19.31	169	95	68	106	4.8	4.7	1	3.71	1.43	1.66	334	5.2	35	11.23	35.99	40.06	178.5	0	0	NA	0	0	0	0	0	0.28	0.2	3.2	4.46	12.2477	5.75162	25.6281	86.4	84.6
1653	A	2	28	2	2	2	1	2	2	164	55	20.45	100	68	74	88	4.8	5	0.98	4.68	2.19	1.79	277	5.4	27.6	13	49.01	46.83	353	0	0	NA	0	0	0	0	0	0.28	0.14	3.77	7.54	8.24604	6.72362	50.682	86.4	90
1654	A	2	25	2	2	2	1	2	2	156	47	19.31	109	68	63	87	4.3	4.6	1.11	5.19	2.27	2.1	232	5.3	23.3	12.17	67.25	40.6	221.9	0	0	NA	0	0	0	0	0	0.3	0.3	5.53	5.47	12.1177	5.82915	31.8593	77.4	82.8
1655	A	2	27	2	2	2	1	3	3	161	53	20.45	95	64	69	76	4.8	7.4	1.98	6.07	3.51	1.5	248	5.4	21	11.07	31.38	39.7	317	0	0	NA	0	0	0	0	0	0.28	0.1	2.83	7.98	8.49828	5.69993	45.5133	86.4	133.2
1656	A	1	27	2	2	2	7	2	2	185	63	18.41	109	75	71	81	5.1	5.7	1.09	4.88	2.33	1.81	430	5.3	39.7	13.32	88.26	42.77	378.3	1	0	NA	0	0	0	0	0	0.31	0.23	6.63	8.84	7.77025	6.1407	54.3144	91.8	102.6
1657	A	1	41	2	2	2	7	3	3	165	59	21.67	128	85	80	64	5.1	4.9	0.96	4.75	2.21	1.79	257	5.6	34.4	18.41	331	81.35	1108	0	0	NA	0	0	0	0	0	0.23	0.3	17.98	13.62	3.48385	11.6798	159.081	91.8	88.2
1658	A	1	38	2	2	2	1	2	2	161	68	26.23	128	86	84	84	5.8	7.5	6.31	4.87	1.81	1.05	375	5.5	30.8	24.24	94.85	69.85	432.8	0	0	NA	0	0	0	0	0	0.35	0.22	3.91	6.2	4.70243	10.0287	62.1393	104.4	135
1659	A	2	22	1	2	2	7	3	2	162	50	19.05	111	71	68	90	5.1	6.3	0.75	4.02	2.07	1.57	266	5.4	29.3	5.65	32.09	46.03	214.1	0	0	NA	0	0	0	0	0	0.12	0.15	5.68	4.65	9.27524	6.60876	30.7394	91.8	113.4
1660	A	1	38	2	2	2	1	2	2	165	69	25.34	124	89	89	76	5.9	9	2.11	4.28	2.46	1.09	406	5.9	26.5	59.7	47.12	152.7	1064	0	0	NA	0	0	0	0	1	0.39	0.04	0.79	6.97	1.91491	21.9239	152.764	106.2	162
1661	A	1	29	1	2	2	1	2	2	167	78	27.97	130	81	92	97	4.9	7.6	3.9	6.01	3.08	1.31	506	5.4	38.8	55.54	178	168.9	1546	1	0	NA	0	0	0	0	0	0.33	0.12	3.2	9.15	1.83735	24.2498	221.967	88.2	136.8
1662	A	2	27	2	2	2	1	2	2	169	59	20.66	96	64	80	80	5.2	4.6	1.09	4.06	1.95	1.42	243	5.4	31.6	12.07	38.03	49.56	108.5	0	0	NA	0	0	0	0	0	0.24	0.35	3.15	2.19	12.2486	7.11558	15.5779	93.6	82.8
1663	A	2	24	2	2	2	1	2	2	153	60	25.63	126	75	83	80	5.2	7.4	1.48	5	2.76	1.45	497	5.7	42.8	30.73	33.59	112.8	1320	1	0	NA	0	0	0	0	0	0.27	0.03	1.09	11.7	2.37818	16.1953	189.519	93.6	133.2
1665	A	1	61	2	2	2	1	2	2	162	54	20.58	147	90	76	64	5.3	5.9	1.58	5.03	2.67	1.61	363	5.8	43.8	9.59	29.62	34.1	196.5	0	0	NA	0	0	0	0	0	0.28	0.15	3.09	5.76	11.3273	4.89591	28.2125	95.4	106.2
1666	A	1	32	2	2	2	1	2	2	168	64	22.68	120	86	79	83	5.4	2.9	0.94	4.98	2.73	1.57	394	5.6	28.3	22.11	36.27	68.21	53	0	0	NA	0	0	0	0	0	0.32	0.68	1.64	0.78	12.713	9.79325	7.60948	97.2	52.2
1667	A	2	26	2	2	2	7	3	2	160	51	19.92	107	72	72	121	5.5	7	0.74	3.64	1.24	1.78	252	5.5	34.1	16.46	36.56	69.9	252.6	0	0	NA	0	0	0	0	0	0.24	0.14	2.22	3.61	6.2164	10.0359	36.267	99	126
1668	A	1	28	2	2	2	6	2	2	175	92	30.04	133	84	101	84	4.7	7.2	1.36	4.22	2.31	1.21	500	5.5	28.9	16.28	56.73	76.52	833.7	1	0	NA	0	0	0	0	0	0.21	0.07	3.48	10.9	3.92099	10.9864	119.698	84.6	129.6
1669	A	1	34	2	2	2	7	3	2	170	78	26.99	148	104	91	87	5.1	7.4	2.17	6.18	3.92	1.32	463	5.3	36.9	18.85	37.87	76.07	575.7	1	0	NA	0	0	0	0	0	0.25	0.07	2.01	7.57	4.35296	10.9218	82.6561	91.8	133.2
1670	A	2	27	2	2	2	7	2	2	149	43	19.37	117	79	62	98	4.7	4.9	1.15	9.07	5.77	1.96	227	5.1	33.5	13.89	68.79	46.85	576.2	0	0	NA	0	0	0	0	0	0.3	0.12	4.95	12.3	6.74338	6.72649	82.7279	84.6	88.2
1671	A	1	35	1	2	2	1	2	2	166	69	25.04	115	69	80	65	5.2	7.7	1.51	5.05	3.04	1.28	415	5.4	38.8	24.99	28.29	80.06	323.9	0	0	NA	0	0	0	0	0	0.31	0.09	1.13	4.05	5.25418	11.4946	46.5039	93.6	138.6
1672	A	2	26	2	2	2	7	3	2	156	46	18.9	95	59	65	93	4.7	4.5	0.92	5.52	3.13	1.85	261	5.6	14.9	11.2	110.84	22.29	436.7	0	0	NA	0	0	0	0	0	0.5	0.25	9.9	19.59	11.6353	3.20029	62.6992	84.6	81
1673	A	1	41	2	2	2	7	2	2	165	55	20.2	120	80	79	90	5	6.6	2.7	4.47	1.97	1.35	438	4.4	24.1	15.47	32.63	33.68	227.9	1	0	NA	0	0	0	0	0	0.46	0.14	2.11	6.77	10.8262	4.83561	32.7207	90	118.8
1674	A	1	35	2	2	2	1	2	2	165	50	18.37	121	74	74	72	4.7	3.3	1.4	5.25	3.07	1.46	381	4.8	41.3	11.53	56.61	63.03	96.25	0	0	NA	0	0	0	0	0	0.18	0.59	4.91	1.53	12.5959	9.04953	13.8191	84.6	59.4
1675	A	1	54	1	1	2	2	2	2	172	68	22.99	139	89	84	99	8.4	21.5	1.82	6.16	3.7	1.6	309	8	31.3	54.61	69.16	67.14	419.7	0	1	NA	1	1	1	0	0	0.81	0.16	1.27	6.25	2.70097	9.63963	60.2584	151.2	387
1676	A	1	39	2	2	NA	7	2	2	168	77	27.28	122	80	98	75	5.7	9.5	3.18	5.36	3.08	1.05	424	5.9	25.3	31.37	81.02	48.36	455.3	1	0	NA	0	0	0	0	1	0.65	0.18	2.58	9.41	5.3273	6.94329	65.3697	102.6	171
1677	A	1	37	NA	2	2	1	1	1	172	79	26.7	131	79	88	86	4.8	7.7	3.8	5.74	3.02	1.12	544	5.9	54.3	37.53	128.3	99.62	563.7	1	0	NA	0	0	0	0	0	0.38	0.23	3.42	5.66	3.88659	14.3029	80.9332	86.4	138.6
1678	A	2	27	2	2	2	1	2	2	148	44	20.09	115	78	60	82	4.5	4.9	1.19	4.05	2.01	1.47	324	5.2	25	13.59	91.9	58.31	301.4	0	0	NA	0	0	0	0	0	0.23	0.3	6.76	5.17	8.216	8.37186	43.2735	81	88.2
1679	A	1	41	2	2	2	1	2	2	169	70	24.51	136	85	91	88	5	5.1	6.95	6.97	2.62	1.04	527	5.5	40.2	46.4	122.6	100.4	587.6	1	0	NA	0	0	0	0	0	0.46	0.21	2.64	5.85	4.14354	14.4149	84.3647	90	91.8
1680	A	1	37	2	2	2	1	2	2	169	67	23.46	104	65	83	76	5.5	8.9	1.6	5.36	3.21	1.23	432	5.9	23.9	15.01	114.31	51.95	595.1	1	0	NA	0	0	0	0	1	0.29	0.19	7.62	11.46	4.74301	7.45872	85.4415	99	160.2
1682	A	1	29	2	2	2	1	3	3	168	69	24.45	147	88	86	71	4.6	6.3	1.87	5.25	3.19	1.24	589	5.4	43.6	26.9	96.41	107.9	420.8	1	0	NA	0	0	0	0	0	0.25	0.23	3.58	3.9	4.57584	15.4917	60.4164	82.8	113.4
1683	A	1	38	2	2	2	3	1	2	175	84	27.43	123	91	86	82	5.9	6.9	1.6	5.14	2.89	1.36	501	5.6	29.8	24.25	99.34	71.17	231.1	1	0	NA	0	0	0	0	0	0.34	0.43	4.1	3.25	6.07158	10.2182	33.1802	106.2	124.2
1684	A	1	32	2	2	2	1	2	2	164	60	22.31	119	60	84	81	4.5	7.1	1.19	3.94	1.75	1.41	286	5.6	37.6	13.33	41.88	48.34	302	0	0	NA	0	0	0	0	0	0.28	0.14	3.14	6.25	8.23086	6.94042	43.3597	81	127.8
1685	A	1	37	1	2	2	6	2	2	160	68	26.56	121	72	89	81	4.9	7.3	2.77	5.36	3.05	1.28	351	5.4	39.1	44.58	9.07	94.57	106.3	0	0	NA	0	0	0	0	0	0.47	0.09	0.2	1.12	7.26217	13.5779	15.262	88.2	131.4
1686	A	1	39	1	2	2	1	2	2	166	76	27.58	131	85	93	61	7.2	12.9	1.1	3.39	1.95	0.93	524	6.4	37.6	34.31	27.37	50.68	346.9	1	1	NA	0	1	0	0	0	0.68	0.08	0.8	6.84	4.53194	7.27638	49.8062	129.6	232.2
1687	A	1	36	1	2	2	1	1	2	170	62	21.45	128	79	79	89	4.9	5.6	1.54	5.74	3.18	1.59	507	5.4	40.4	21.03	65.49	72.33	468.6	1	0	NA	0	0	0	0	0	0.29	0.14	3.11	6.48	5.45452	10.3848	67.2793	88.2	100.8
1688	A	1	36	2	2	2	1	2	2	171	71	24.28	126	74	82	73	5.1	6	1.56	4.19	2.25	1.29	468	5.8	34.9	36.37	55.98	65.76	149.3	1	0	NA	0	0	0	0	0	0.55	0.37	1.54	2.27	8.64911	9.44149	21.4358	91.8	108
1689	A	1	34	2	2	2	6	1	2	168	69	24.45	112	75	80	83	4.8	6.5	2.21	4.71	2.87	1.03	448	5.3	26.8	14.92	40.53	71.6	192.8	1	0	NA	0	0	0	0	0	0.21	0.21	2.72	2.69	7.63715	10.28	27.6813	86.4	117
