# Supplementary material for: Subgroup analysis of proinsulin and insulin levels reveals novel correlations to metabolic indicators of type 2 diabetes
Source: publisher site journal article supplement (doi:10.18632/aging.103289), 2020-06-12
Supplement: Supplementary file 2 [file aging-v12i11-103289-supplementary-material-SD10.docx]

We are providing evidence here to show that the current study is completely different from a previous co-authored paper published in *Hainan Medical Journal.* The current study was conducted at different time, on different subjects, and at different locations. We provide the evidence as follows:

**----(1)-----The two projects were carried out in a different time.** Previous study conducted “from June 2012 to January 2014” (Attachment_1, highlight), while current study was evaluated by governmental body (Ministry of health) in July 2017 (Attachment_2), approved by Ethics committee in Feb 2019 (Attachment_3), and officially registered in Chinese Clinical Trial Registry in June 2019 (Attachment_4). The questionnaire was sent and collected between 2018-2019 (Attachment_5). We provided 5 sample questionnaires with original signature and date (Attachment_5), which are corresponding to the names and data in the original data (Attachment_6, first 5 rows). If the reviewer would like to have the original data from any of the 1692 participants, we can provide.

**----(2)-----The two projects were carried out on different population.** Previous study was conducted on ‘PATIENTS WITH T2D in our hospital’ (Attachment_1, highlight), aiming to understand the results of a treatment. Previous study did not have normal subjects, while current study is consist of all T2D, normal and pre-diabetic subjects (Attachment_6).

**----(3)-----The two study were aiming at different location.** The subject of previous study was ‘patients with T2D IN OUR HOSPITAL’ (Attachment_1, highlight), while subjects in current study were from cities and countryside of the whole province (Attachment, green highlight).
