# Supplementary material for: Subgroup analysis of proinsulin and insulin levels reveals novel correlations to metabolic indicators of type 2 diabetes
Source: publisher site journal article supplement (doi:10.18632/aging.103289), 2020-06-12
Supplement: Supplementary file 3 [file aging-v12i11-103289-supplementary-material-SD9.xlsx]

## Sheet: Sheet1(精简)
海南省 非糖尿病人群胰岛素原/真胰岛素、25羟维生素D3、腰围与血糖代谢的相关性研究
姓名（(name)	location A城市（city） B农村(countryside)	编号(No.)	Sex 1=男；2=女	是否闭经 1=是；2=否	出生年份	出生月份	Age	民族 1=汉族 2=藏族 3=维吾尔族 4=回族 5=壮族 6＝其他	文化程度 0=文盲 1=小学 2=初中 3=高中/中专 4=大学/大专 5=研究生	职业 1=工人 2=农民 3=职员 4=家务 5＝学生 6=其他	家庭年收入 1=低于5000元 2=5000-10000元 3=1－3万元 4=3-5万元 5= 5-10万元 6=高于10万元	生育史 1=流产 2=死胎 3=新生儿死亡 4=正常 5=未孕	食用盐来源 1＝市售碘盐 2＝未加碘盐	进食盐习惯 1=重度；2=中度；3=轻度	三天来是否进食海带、紫菜 1=是 2=否	服海带紫菜情况 1＝经常；2＝偶尔；3＝不吃	目前正在服含碘药物 1＝是；2＝否	如果是，续问：何种药物	三个月之内接受造影剂检查 1=有；2=无	是否吸烟 1=不吸；2=偶尔吸；3=经常吸	吸烟开始年龄	烟龄	吸烟（支/天）	吸烟（斤/天）	是否被动吸烟	被动吸烟烟龄	甲状腺疾病家族史 1=有；2=无	甲状腺疾病家族史种类 1=甲亢；2=甲减；3=甲状腺肿；4=甲状腺结节；5=甲状腺癌；6=甲状腺腺瘤；7=其它	个人甲状腺疾病史 1=有；2=无	个人甲状腺疾病种类 1=甲亢；2=甲减；3=甲状腺肿；4=甲状腺结节；5=甲状腺癌；6=甲状腺腺瘤；7=其它	若有个人甲状腺癌病史，分型 1=髓样癌；2=乳头状；3=滤泡状；4=未分化；5=不记得	糖尿病家族史 1=有；2=无	糖尿病家族史，关系 1=祖父系（祖父辈）2=祖母系（祖母辈） 3=父系，父辈 4=母系，母辈 5=兄弟姐妹级 6=子女级	糖尿病个人史 1=有；2=无	若有，个人血糖异常情况 1=糖尿病；2=糖耐量低减；3=未知	个人糖尿病分型 1=1型糖尿病；2=2型糖尿病；3=妊娠期糖尿病；4=其他特殊类型；5=未知	糖尿病病程	糖尿病药物治疗方法 1=双胍类 2=促泌剂 3=糖苷酶抑制剂 4=噻唑烷二酮 5=中/长效胰岛素 6=短效胰岛素 7=预混胰岛素 8=胰岛素类似物	是否有糖尿病并发症 1=有；2=无；3=未知	心绞痛	心肌梗塞	冠状动脉手术搭桥	冠状动脉支架介入治疗	心力衰竭	夹层动脉瘤	脑出血	脑梗塞	下肢动脉栓塞	糖尿病足
吴光琼	B	76	1		1963	2	54	1	3	3	1	4	1	3	2	3	2		2	2					2		2		2			2		2					2
郑荣添	B	453	1		1951	8	66	1	3	1			2	2	2	2	2		2	2	30	36	10				2		2			2		2					2
杨德	B	497	1		1965	3	52	6	3	1	5		1	3	2	2	2		2	1					2		2		2			2		2					2
苏彩荣	B	498	2	2	1978	3	39		2	1		4								1									2					2
董琼珍	B	499	2	1	1957	9	60						1	1	2	2	2		2	1					2		2		2			2		1	1	2		7	2
李秋恋	A	2	2	2	1987	6	29	1	4	3	3	4	1	2	2	2	2		2	1					1		2		1	4		2		2					2
纪群	A	5	2	2	1986	11	30	1	5	3	5	4	1	2	1	1	2		2	1					1		2		2			1	13	2					2
方团育	A	6	1		1977	1	40	1	5	3	6	4	1	3	2	2	2		2	1					2		1	4	2			2		2					2
陈美辰	A	7	2	2	1990	10	27	1	4	6	5	4	1	3	2	2	2		2	1					2		2		2			1	3	1	1	3			2
陈道雄	A	10	1		1964	3	53	1	4	6	6		1	2	2	2	2		2	1					2		2		2			1	3	2					2
朱美珊	A	11	2	2	1991	2	25	1	4	3	6	4	1	3	1	2	2		2	1					2		2		2			2		2					2
林乐韦华	A	12	2	2	1982	11	34	1	5	6	2	4	1	2	2	2	2		2	1					2		1	6	2			1	34	1	1	3			2
张华川	A	13	1		1975	10	42	1	4	3	6		1	3	2	2	2		2	2	25		5		1	10	2		2			2		2					2
高兰	A	14	2	2	1985	7	32	1	5	6	5		1	1	2	2	2		2	1					1		2		2			1	2	2					2
陈兰	A	15	2	1	1970	9	54	1	4	6	6	4	1	3	2	2	2		2	1					2		1	26	2			2		2					2
陈春怡	A	17	2	2	1990	1	27	6	4	3	1	5	1	2	1	2	2		2	1					2		1	2	2			2		2					2
张余	A	20	2	2	1993	12	24	1	4	6	4	5	1	3	2	2	2		2	1					2		2		2			2		2					2
林少娜	A	26	2	2	1981	12	36	1	4	6	2	4	1	2	1	2	2		2	1					1		2		2			2		2					2
黄佩卿	A	27	2	2	1952	6	65	1	2	2	2	4	1	2	2	2	2		2	1					1		2		2			2		2					2
吴海英	A	28	2	2	1971	11	46	1	4	6	6	4	1	2	2	3	2		2	1					1	20	2		2			2		2					2
全会标	A	29	1		1973	7	43	1	5	6	6	4	1	3	2	2	2		2	1					2		2		2			2		2					2
陈起智	A	30	1		1969	9	48	1	4	6	6	5	1	2	2	2	2		2	3	28	20	10		1	30	2		2			2		2					2
黄奕燕	A	34	2	1	1970	4	47	1	4	3	1		1	2	2	2	2		2	1					2		2		2			2		2					2
魏伟平	A	36	1		1984	4	32	1	5	6	5		1	2	2	2	2		2	1					2		1	1	2			1	1234	2					2
文翠花	A	38	2	2	1983	10	34	1	4	3	1	4	1	2	2	1	2		2	1					1		2		1	1		2		2					2
张玉海	A	39	1		1980	10	36	1	5	3	5	4	1	2	2	2	2		2	1					2		2		2			2		2					2
陈山	A	40	1		1979	8	37	1	4	3	2	5	1	2	2	3	1	6	2	1					1	20	2		2			1	23	2					2
黄奕蝶	A	41	2	1	1968	5	49	1	4	6	5	4	1	2	1	1	2		2	1					1	10	2		2			2		2					2
邢华荣	A	42	2	1	1966	3	51	1	2	1	2	4	1	3	2	2	2		2	1					2		2		2			1	5	2					2
王桂琴	A	43	2	2	1986	11	30	1	4	6	5	4	1	2	2	2	2		2	1					1	2	2		2			1	4	2					2
陈清华	A	44	2	2	1986	12	30	1	4	3	5	5	1	1	2	2	2		2	1					1	2	2		2			2		2					2
施丽娇	A	45	2	1	1957	5	60	1	1	6	3	4	1	2	2	1	2		2	1					2		2		2			1	3	2					2
邓玲	A	46	2	2	1987	7	29	1	4	3	2	4	1	2	2	2	2		2	1					2		1	12	2			2		2					2
苏冬暖	A	47	2	2	1988	10	28	1	3	6	2	5	1	2	2	2	2		2	1					2		2		2			1	3	2					2
王如洲	A	48	2	2	1990	7	26	1	4	6	5	4	1	2	2	3	2		2	1					1		2		1	1		1	3	2					2
林碧玲	A	49	2	2	1979	5	37	1	4	6	5	4	1	2	2	1	2		2	1					2		2		2			1	14	2					2
张冰	A	50	2	2	1994	11	23	1	4	6	1	5	1	2	2	2	2		2	1					1		2		2			2		2					2
林凯龙	A	51	1		1991	4	26	1	4	6	5	4	1	2	2	2	2		2	1					2		2		2			1	4	2					2
何振英	A	52	2	1	1957	10	59	1	3	6	2	4	1	2	2	2	2		2	1					2		2		2			1	4	2					2
邓永生	A	53	1		1957	10	60	1	3	6	2	4	1	2	2	2	2		2	1					2		2		2			2		2					2
符茂雄	A	54	1		1964	10	53	1	4	6	2		1	2	2	2	2		2	1					2		2		2			2		2					2
吴祖荣	A	55	1		1964	1	53	1	4	3	6	4	1	2	2	2	2		2	3	26	26	15		1	30	2		2			2		2					2
唐云妃	A	57	2	1	1939	9	27	1	3	6	4	4	1	2	2	2	2		1	1					1		2		2			2		2					2
冯楷	A	58	1		1996	2	21	1	4	5	3		1	3	2	2	2		2	3	18	3			2		2		2			2		2					2
吴君	A	59	2	2	1995	7	21	1	4	5		5	1	3	2	2	2		2	1					2		2		2			2		2					2
黄亚莲	A	60	2	2	1975	11	41	1	4	6	6	4	1	3	2	2	2		2	1					2		2		2			2		2					2
陈金逸	A	63	2	2	1979	9	37	1	4	6	4	4	1	2	2	3	2		2	1					2		1	12	1	1		1	4	2					2
王秋怡	A	64	2	2	1987	8	29	1	4	6	2	5	1	2	2	2	2		2	1					2		2		2			2		2					2
陈清龙	A	65	1		1993	9	24	1	4	3	5		1	2	1	2	2		2	2	18	6	1		1	6	2		2			2		2					2
周运朝	A	66	1		1980	7	37	1	2	2	3		1	1	2	2	2		2	1					2		2		2			2		2					2
陈小妹	A	67	2	2	1990	8	26	1	4	3	4	4	1	2	1	1	2		2	1					2		2		2			2		2					2
韦吉林	A	68	1		1988	2	29	1	4	3	5		1	2	2	3	2		2	2	20	9	3		1		2		2			2		2					2
琚爱国	A	69	2	1	1951	9	65	1	3	6	5	4	1	2	2	2	2		2	1					2		2		2			2		2					2
李建英	A	70	2	1	1967	10	50	1	4	6	4	4	1	2	2	2	2		2	1					2		2		2			2		2					2
张裕蕾	A	71	2	2	1995	7	22	1	3	3	3	5	1	1	2	2	2		2	1					2		2		2			1	1	2					2
王冠仪	A	72	2	2	1992	8	25	1	3	3	1	3	1	1	2	2	2		2	1					2		2		2			1		2					2
吴坤	A	73	1		1992	5	25	1	4	3	6		1	2	2	2	2		2	1					1		2		2			2		2					2
张长怀	A	74	1		1964	4	53	1	1	1	4	4	2	2	2	2	2		2	1					2		2		2			1	5	1	2				2
汤宾燕	A	75	2	2	1992	12	24	1	4	6	4	5	2	2	2	2	2		2	1					2		2		2			1	4	2					2
符燕群	A	76	2	2	1992	12	24	1	4	6	3	5	1	3	2	2	2		2	1					2		2		2			2		2					2
陈敏	A	77	1		1992	3	25	1	5	6	4	4	1	2	1	2	2		2	1					2		2		2			2		2					2
兰晶晶	A	78	2	2	1993	6	24	6	4	6	4	5	1	2	2	2	2		2	1					2		2		2			2		2					2
孙青宜	A	79	2	2	1990	5	27	1	5	6	4	5	1	2	2	2	2		2	1					2		2		2			1	2	2					2
陈献谋	A	81	1		1994	6	22	1	4	5	3	4	1	3	2	2	2		2	2	12	12	1		2		2		2			2		2					3
张兰英	A	82	2	2	1968	9	49	1	2	1	3	4	1	2	2	2	2		1	1					2		2		2			2		2					2
莫常灵	A	83	2	2	1977	6	40	1	1	1	3	4	1	1	2	3	2		2	1					2		2		2			2		2					2
刘新容	A	84	2	2	1973	1	44	1	2	2	3	4	1	3	2	3	1	6	2	1					2		2		1	1		2		2					2
琚菁	A	85	2	2	1980	2	37	1	4	6	6	4	1	2	1	2	2		2	1					1	16	2		2			2		2					2
胡敏	A	86	2	2	1974	5	43	1	2	6	2	4	1	2	2	2	2		2	1					2		2		2			2		2					2
凌庆武	A	87	1		1985	11	32	1	4	3	5	4	1	2	2	2	2		2	3	24	8			1		2		2			2		2					2
钟月英	A	88	2	1	1947	7	70	1	3	6	2	4	1	2	2	2	2		2	1					2		2		1	7		1	3	1	2				2
周向军	A	89	1		1975	12	42	1	4	6	2	4	1	2	2	2	2		2	3							2		2			1	4	1	2				2
周德益	A	90	1		1948	5	69	1	4	6	2	4	1	2	2	2	2		2	3					2		2		2			2		2					2
符花英	A	91	2	1	1955	12	62	1	2	1	3	4	1	2	2	1	2		2	1					2		2		2			2		2					2
黄奕东	A	92	1		1949	7	68	1	3	6	5	4	1	2	2	1	2		2	1					1		2		2			2		2					2
符花英	A	93	2	1	1967	5	50	1	2	1	3	4	1	2	2	2	2		2	1					2		2		1	1		2		2					2
黄世清	A	94	1		1978	10	39	1	5	3	5	4	1	3	2	1	2		2	1					2		2		2			2		2					2
吴少珍	A	95	2	2	1982	5	35	1	4	6	4	4	1	1	2	2	2		2	1					1		2		2			2		2					2
吴亮	A	96	1		1979	1	38	1	5	3	4	4	1	2	2	2	2		2	2					1		2		2			2		2					2
吴和凤	A	97	2	1	1953	7	64	1	2	2	1	4	1	2	2	2	2		2	1					2		2		2			2		2					2
吴坤銮	A	98	1		1951	1	66	1	3	6	4	4	1	2	2	2	2		2	1					2		2		2			2		2					2
卢开才	A	101	1		1973	2	45	1	4	3	4	4	1	1	2	2	2		2	1					1		2	1	2			2		2					2
王亚男	A	102	1		1976	7	41	1	2	2	2	4	1	1	2	3	2		2	3	17	23	5		1	23	2		2			2		1	1	2			3
冯秀春	A	103	2	1	1955	1	62	1	1	6	5	4	1	3	2	2	2		2	1					2		2		2			1	5	2					2
潘正燕	A	104	2	1	1953	8	64						1	2	2	2	2		2	1							2		2			2		2					2
王毅	A	105	1		1982	7	34	1	4	6			1	2	2	2	2		2	1					2		2		2			2		2					2
苏杨深	A	106	1		1993	5	24	1	4	3	3	5	1	2	2	2	2		2	1					1	5	2		2			1	3	2					2
薛芳	A	107	2	2	1983	12	34	1	4	6										1					2		2		2			1	4	2					2
方素芬	A	108	2	2	1955	3	62	1	2	6										1					2		2		2			2		2					2
周丽华	A	109	2	2	1977	11	39	1	4	6	2	4	1	2	1	2	2		2	1					2		1	4 6	2			1	3 4	2					2
王勇	A	110	1		1967	2	50	1	4	3	2	4	1	2	2	2	2		2	1					2		2		2			2		2					2
吉望	A	111	2	2	1993	8	23	6	4	5	1	5	1	3	2	2	2		2	1					2		2		2			1	3	2					2
潘良健	A	112	2	1	1963	4	54	1	3	6	5	4	1	2	2	2	2		2	1					2		2		2			2		2					2
林道华	A	113	1		1965	11	51	1	4	3	5		1	2	2	2	2		2	1					2		2		2			2		2					2
林榆	A	114	1		1989	9	27	1	4	3	5		1		1	2	2		2	1					2		2		2			2		2					3
邓玉书	A	115	1		1952	11	65	1	1	6	1		1	2	1	2	2		2	1					1		2	24	1	24		2		2					2
徐应教	A	117	1		1964	5	53	1	2	6	1	4	1	2	2	3	2		2	2					1		2		2			2		2					2
徐小娜	A	118	2	2	1990	11	27	1	4	6	2	5	1	2	2	2	2		2	1					2		2		2			2		2					2
王玉君	A	119	2	1	1964	8	52	1	3	1	1	4	1	2	2	3	2		2	1					2		2		1	1		2		2					2
张新泉	A	120	1		1986	6	30	1	1	6	2		1		2	3	2		2	3	16		10				2		2			2		2					2
张金銮	A	121	2	2	1980	8	36	1	2	6	2	4	1	2	2	2	2		2	1					2		2		2			2		2					2
吴秀丽	A	122	2	2	1981	10	35	1	2	6	2	4	1	2	2	2	2		2	1					2		2		2			2		2					2
王玉洁	A	124	2	2	1989	10	26	1	5	3	6	5	1	3	2	2	2		2	1					2		2		2			2		2					2
林碧映	A	126	2	2	1972	10	44	1	3	4	6	4	1	2	1	2	2		2	1					1		1	12	1	1		2		2					2
林震	A	127	1		1976	7	40	1	4	6	6	4	1	2	2	2	2		2	2	21						1	12	2			2		2					2
李燕	A	128	2	2	1980	7	36	1	4	6	5	4	1	2	2	2	2		2	1					1		2		2			1	1	2					2
林碧珠	A	129	2	1	1970	11	46	1	3	3	2	4	1	2	2	2	2		2	1					1	46	1	12	2			2		2					2
王绥云	A	131	1		1986	7	29	1	4	6	5	4	1	2	2	2	2		2	1					1	2	2		2			1	4	2					2
王丽	A	132	2	2	1988	7	28	1	4	3	2	5	1	3	2	3	2		2	1					1		2		2			2		2					2
彭佳倩	A	133	2	2	1991	10	25	1	4	3	5	5	1	2	1	2	2		2	1					1		2		2			1		2					2
刘保全	A	134	2	2	1991	2	26	1	4	3	5	5	1	2	2	2	2		2	1					2		2		2			2		2					2
王容英	A	136	2	1	1955	8	62	1	1	2	1	4	1		2	3	2		2	1					2		2		1	1		2		2					2
吴淑培	A	137	1		1984	9	33	1	4	6		4	1		2	3	2		2	3	25				2		2		2			2		2					2
徐小恋	A	138	2	2	1985	9	32	1	4	6	2	5	1		2	2	2		2	1							2		2			2		2					2
符永霞	A	139	2	2	1991	6	25	1	4	6	5	5	1	2	2	1	2		2	1					1	2	2		2			1	1	2					2
莫丽娟	A	142	2	1	1967	9	50	1	3	1	3	4	1	3	2	2	2		2	1					1	22	2		2			1	4	1	1	2	4	1	2
王荣兰	A	143	2	2	1973	12	44	1	4	6	5	4	1	2	2	2	2		2	1					1	20	2		2			2		2					2
梁业菊	A	144	2	1	1962	10	55	1	3	4	5	4	1	2	2	2	2		2	1					1	20	2		2			2		2					2
梁关琼	A	145	1		1959	11	58	1	3	3	5		1	2	2	2	2		2	1					1	20	2		2			2		2					2
李少登	A	146	2	2	1986	7	31	1	4	6	4	5	1	2	2	2	2		2	1					2		2		2			2		2					2
包艳丽	A	147	2	2	1987	1	30	1	4	3	5	5	1	3	2	3	2		2	1					2		1	7	2			1	24	2					2
吴海燕	A	148	2	2	1978	3	39	1	3	6	4	4	1	2	2	2	2		2								2		2			1	3	2					2
郭亚琴	A	149	2	2	1972	8	45	1	3	1	3	4	1	3	2	2	2		2	1					2	10	2		2			1	4	2					2
李玲	A	150	2	1	1971	6	46	1	1	1	1	4	1	2	2	2	2		2	1							1	7	1	7		2		2					2
何惜	A	151	1		1984	3	33	1	4	6	2		1	2	2	3	2		2	1					2		2		2			2		2					2
罗东	A	152	1		1979	12	37	1	4	3	6	4	1	2	2	2	2		2	2	18	20	1		2		2		2			2		2					2
陈丽霞	A	153	2		1969	8	48	1	1	1	1	4	1	2	2	2	2		2	1					1	18	2		2			2		2					2
洪家清	A	154	1		1966	3	51	1	3	3			1	2	1	1	2		2	1							2		2			2		2					2
刘德达	A	155	1		1987	3	30	1	4	6	5		1	2	2	2	2		2	1					2		1	7	2			2		2					2
王佳	A	156	1		1972	5	45	1	4	6	5		1	2	2	3	2		2	3	20	27	20		2		2		2			2		2					2
谢霞梅	A	157	2	2	1974	9	43	1	4	6	5	1	1	2	2	2	2		2	1							2		1	4		2		2					2
陈海燕	A	158	2	1	1969	6	48	1	3	1	3	4	1	2	2	2	2		2	1					1	2	2		2			2		2					2
王大流	A	159	1		1944	6	73	1	2	6	5	1	1	2	2	3	2		2	3	20	53	15		2	2	2		2			2		2					2
许秀茱	A	160	2	1	1954	11	63	1	2	6	5	4	1	2	2	3	2		2	1					2		2		1	1		2		2					2								1
张海燕	A	161	2	2	1975	6	42	1	1	1	1	4	1	2	2	2	2		2	1					1		2		2			2		2					2
周树彬	A	162	1		1977	2	40	1	2	6			1	2	2	3			2	2	30	5					2		2			2		2					2
黄春美	A	163	2		1977	8	40	1	2	6			1	2	2	3			2	1							2		2			2		2					2
王进	A	164	2	2	1973	11	44	1	4		6	4	2	3	1	1	2		2	1					2		2		2			1	4	2					2
林玉叶	A	165	2	2	1975	12	42	1	4	6	5	4	1	2	2	2	2		2	1					1	16	2		1	7	4	2		2					2
车春	A	166	2	2	1978	7	39	1	4	6	5	4	1	2	2	2	2		2	1					2		2		2			2		2					2
翁晓芳	A	167	2	2	1979	11	38	1	4	6	4	4	1	2	2	2	2		2	1					1		1	1	2			2		2					2
夏连芳	A	168	2	2	1970	7	47	1	2	1	3	4	1	3	2	2	2		2	1					1	24	2		2			1	5	2					2
王慧	A	169	2	2	1975	6	42	1	4	6	4	4	1	2	2	3	2		2	1					1	15	1	13	1	1		2		2					2
王川贤	A	170	1		1958	6	59	1	4		6		1	3	2	2	2		2	1					2		2		2			1	5	2					2
陈小岩	A	172	2		1970	12	47	1	4	6	6	4	1	2	2	2	2		2	1					1	10	2		2			2		2					2
文来荣	A	173	2	2	1951	2	66	1	3	1	1	4	1	2	2	2	2		2	1					2		2		1	3	5	2		2					2
倪赛娥	A	175	2	2	1965	7	51	1	3	6	6	4	1	3	2	2	2		2	1					1		2		2			2		2					2
徐和玉	A	176	2	1	1963	11	54	1	1	3	2	4	1	2	2	2	2		2	1					2		2		2			1	4	2					2
黄秋爱	A	177	2	2	1966	10	50	6	1	3	1	4	1		2	2	2		2	1					2		2		2			2		2					2
梁乙香	A	178	2	1	1960	7	57	1	2	4	5	4	1	3	2	3	2		2	1					2		2		2			2		2					2
李代安	A	179	2	2	1970	2	47	1	3	1	1	4	1	3	2	2	2		2	1					2		2		2			2		2					3
张德祥	A	180	1		1964	9	53	1	3	1	3	4	1	3	2	2			2	3	24	30	10		1		2		2			2		2					2
张池莲	A	181	2	2	1975	6	42	1	2	1	2	4	1	2	2	3	1	1	2	1					2		2		2			2		2
何雪英	A	182	2		1979	1	39	1	2	1	2	4	1	2	2	3	2		2	1					2		1	7	1	7		2		2					2
吴春叶	A	183	2	1	1973	10	40	1	2	1	2	4	1	3	2	2	2		2	1					2			6	2			2		2					2
黄美卿	A	184	2	1	1967	10	50	1	3	6	2	4	2	2	2	2	2		2	1					2		2		2			2		2					2
曾德花	A	185	2	1	1952	9	64	1	2	1	1		1	2	2	2	1	1	1	1					2		2		1	2		2		2					2
陈花	A	186	2	1	1970	5	47	1	2	3	3	4								1					1	20	2		2			2		2					2
周顺财	A	187	1		1980	9	37	1	3	1	1	4	1	1	1	1	1	6	1	1					2		2		2			2		2					2
钟二亮	A	188	1		1987	8	30	1	2	3	2		1	2	2	2	2		2	3	25	10	10				2		2			2		2					2
吴毓聪	A	189	1		1979	4	38	1	4	3	6		1	2	2	2	2		2	1					2		2		2			2		2					2
陈进克	A	190	1		1963	5	54	1	3	3	2		1	3	2	3	2		2	1					1		2		2			1	3	2					2
陈积平	A	191	1		1967	11	49	1	3	2	3		1	2	2	2	1	6	2	3	20	30	10		2		2		2			2		2					2
郑桂琼	A	192	2	2	1967	10	49	1	1	4	3	4	1	1	2	3	1	6	2	1					1		2		2			2		2					2
余德元	A	193	1		1964	2	53	1	4	2	5	4	1	2	2	2	2		2	3	20	33	20		1		2		2			2		2					2
廖永	A	194	1		1976	9	41	1	4	3	5	4	1	2	2	2	2		2	3	23	18			2		2		2			1	3	2
谢丽英	A	195	2	2	1969	8	48	1	3	4		4	1	3	2	2	2		2	1					2		2		1	6		2		2					2
周虹	A	196	2	2	1985	2	32	1	4	6	4	4	1	2	2	2	2		2	1							2		2			2		2					2
郑其邦	A	197	1		1937	5	80	1	3	1	4		1	2	2	2	2		2	1					2		2		2			2		2					2
许永莉	A	198	2	2	1971	10	46	2	4	3	5	4	1	3	2	2	2		2	1					2		2		2			2		2					2
邱春英	A	199	2	1	1958	5	59	1	1	2	1	4	1	2	2	2	2			1							2	1	1	7		2		2					2
韩瑜	A	200	2	2	1989	1	28	1	3	3	3	5	1	2	1	2	2		2	1					2		2		1	2	4	2		2		5			3
韩燕虹	A	201	2	2	1987	5	30	1	2	4	4	4	1	2	2	2	2		2	1					1		1	23	2			2		2		5			3
邢福成	A	202	1		1962	4	55	1	3	1	3	4	1	2	2	2	2		2	1					2		2		2			2		2					2
汤玉玲	A	203	2	1	1953	6	68	1	3	1	2	4	1	3	1	2	2		2	1					1	25	2		2			2		2					2
倪晓云	A	204	2	2	1991	10	26	1		6	2	5	1	3	2	3	2		2	1					2		2		2			2		2					2
倪小娣	A	205	2	2	1994	1	23	1	4	6	3	5	1	3	2	3	2		2	1					2		2		2			2		2					2
许秀芳	A	206	2	1	1964	5	53	1	2	6	3	4	1	2	2	2				1							2		2			2		2					2
杨兰英	A	207	2	2	1963	1	54	1	1	6	1	4	1	1	2	3	2		2	1					2		2		1	1		2		2					2
洪妚莲	A	208	2	2	1961	2	56	1	1	2	3	4	1	2	2	3	2		2	1					1	34	2		2			2		2					2
曾乐南	A	209	2	2	1961	8	56	1	1	6	3	4	1	2	2	3	2			1					2		2		2			2		2
陈锦礼	A	210	2	1	1941	6	76	1	2	6	4		1	2	2	2	2		2	2					2		2		2			2		2					2
李美霞	A	211	2	1	1943	10	74	1	3	6	4		1	1	2	2	2		2	1					2		2		2			2		2					2
郑壮烈	A	212	1		1940	5	77	1	2	6	3		1	2	1	2	2		2	1					2		2		2			2		2					2
刘雪芬	A	213	2	1	1945	9	72	1	3	6	3		1	2	1	2	2		2	1					2		2		2			1	5	1	1	2		5	2
李锦花	A	214	2	1	1959	11	58	1	3	1	4	4	1	3	2	3	2		2	1					2		1	1	2			2		2					2
王海华	A	215	2	1	1967	9	50	1	3	4	1	4	1	2	2	2	2		2	1					2		2		2			1	3	2					3
蔡遐娟	A	216	2	2	1972	4	45	1	4	6	4	4	1	3	2	2	2		2	1					2		2		1	7		2		2					2
曾荣凤	A	217	2	1	1952	5	65	1	3	6	5		1	3	1	2	1	6	2	1					2		2		2			2		2					2
蔡吉凤	A	218	2	1	1955	10	62	1	1	3	2	4	1	2	1	2	1	6	2	1					2		2		2			2		2					2
韩庆	A	219	1		1959	6	58	1	3	3	4		2	2	2	3	2		2	3	52	6	10		1		2		2			2		2					3
潘秀兰	A	220	2	2	1960	10	54	1	2	4	4	4	2	2	2	3	2		2	1					1		2		1	3		2		2	3	5			3
王海珍	A	221	2	1	1957	9	60	1	4	6	5		1	3	1	2	2		2	1					1	10	2		2			2		2					2
林海浪	A	222	2	2	1975	12	42		2	1			2	2	2	2	2		2	1					2		2	4	2	4		1	3	2	3	5			3
王永娟	A	223	2	2	1970	10	47	1	4	6	2	4	1	2	2	2	2		2	1					2		2		1	34		2		2					2
许绿珠	A	224	2	2	1991	4	26	1	4	6	2	5	1	3	2	2	2		2	1					2		2		2			2		2
刘德道	A	225	1		1985	1	32	1	4	1	4		1	3	2	2	2		2	1					1	30	2		1	1		2		2					2
刘福和	A	226	1		1958	7	59	1	3	2	5	4	1	2	2	2	2		2	3	29	30	10				1	7	2			2		2					2
陈照连	A	227	2	1	1958	2	59	1	2	2	5	4	1	3	2	2	2		2	1					1	30	2		2			2		2					2
吴有金	A	229	1		1963	4	54	1	2	3	2		1	2	2	2	2		2	1					2		2		2			2		2					2
李秀玲	A	230	2	1	1943	12	75	1	1	1	2	4	1	3	2	3	2		2	1					2		2		1	3		2		2					2
许环德	A	231	1		1957	6	60	1	3	1	2		1	3	2	3	2		2	3	30	30	20		1		2		2			2		2					3
吴琼花	A	232	2	1	1960	7	56	1	2	6	3		1	2	2	3	2		2	1					1	35	2		2			2		2					2
车君	A	233	2	2	1980	1	37	1	3	6	3	4	1	1	2	2	1	6	2	1					2		2	1	1	123	4	2		2	3	5			2
牛桂珍	A	234	2	1	1959	1	58	1	3	1	1	4	1	3	2				2	3	24	30	10		2	35	2		2			2		1	3	2	5	1	3
常谦恩	A	235	1		1962	9	55	1	4	3	6	4	1	2	2	2	2		2	1					2		2		2			2		2					2
李巧敏	A	236	2	1	1964	8	53	4	4	3	6	4	1	2	2	2	2		2	1					2		2		2			1	34	1	1	2	4	3	3
冯巧改	A	237	2	2	1967	8	50	1	3	3	5	4	1	2	2	2	2		2	1					2		2		2			1	34	2
陈爱青	A	238	2	1	1950	8	66	1	1	6	1		1	2	2	2	2		2	1					2		2		2			2		2					2
陈泽金	A	239	1		1949	10	68	1					1	2	2	2	2		2	1					2		2		2			2		2					2
郭金荣	A	240	2	2	1971	10	46	1	2	3	1	4	1	3	2	2	1	6	2	1					1	20	2		1	4		2		2					2
卢才	A	241	1		1967	10	50	5	2	3	5		1	1	2	3	2		2	3	30	20	10		1		2		2			2		1	1	2		1	2
崔誉耀	A	242	1		1964	12	52	1	4	6	6	4	1	2	2	2	2		2	3	20	30	15				2		2			2		2					2
曾琼	A	243	2	2	1973	2	44	1	4	3	5	4	2	3	2	3	2		2	1					2		2		1	4		2		2					2
黄光良	A	244	1		1965	10	52	1	3		1		1	2	2	3	2		2	3	17	35	20				2		2			2		2					2
卢亚二	A	245	1		1959	10	58	1	2	6	5	4	1	2	1	2	2		2	3	30	30	20		2		2		2			2		2					2
卢颖	A	246	2	2	1993	8	25	1	3	3	4	5	2	2	2	3	2		2	1					1	25	2		2			2		2					2
麦吉娥	A	247	2	2	1983	10	34	1	3	3	3	4	1	2	2	2	1	6	2	1					2		2		2			2		2					2
吴文婷	A	248	2	2	1982	8	35	1	4	3	2	3	1	2	2	2	2		2	1					1	13	2		2			1	3	2					2
郑亚男	A	249	2	2	1985	7	32	1	2	4		4	2	2	1	2	2		2	1					1		2		2			2		2					2
高芳菊	A	250	2	2	1973	1	42	1	1		1	4	1	3	2	2	2		2	1					1	30	2		2			2		2					2
李燕	A	251	2	1	1963	10	53	1	2	6	4	4	1	2	2	3	2		2	1					1	30	2		2			2		2					2
黄英凤	A	252	2	1	1960	10	57	1	2	6	1	4	1	3	2	2	2		2	1					2		2		2			2		2					2
王君	A	253	2	2	1979	7	37	1	4	3	5	4	1	2	2	2	2		2	1							2		1	4		1	4	2
林政	A	254	1		1970	8	47	1	4	3	5	4	1	2	2	3	2		2	3	20	27	10		1		2		2			1	34	2
符金梅	A	255	2	1	1956	8	62	1	3	6	3		1	3	2	3	2		2	1					1		2		2			2		2					2
吴雪婉	A	257	2	2	1972	8	35	1	4	3	4	4	2	3	2	2	2		2	1					2		2		2			2		2					2
吴瑞娟	A	258	2	2	1972	4	35	1	4	3	4	4	2	3	2	2	2		2	1					2		2		2			2		2					2
欧英谟	A	259	1		1948	3	69	1	3	2	1		1	1	2	3	2		2	3	20	49	3		1	20	2		2			2		2					2	1	1
杨瑞英	A	260	2	1	1963	11	54		3				1	3	1	2	2		2	1					2		1	4	1	4		2		2
陈世义	A	261	1		1954	3	63	1	3	3	5		1	3	1	2	2		2	1					1	10	2		2			2		2					2
蔡甫召	A	262	1		1955	3	62	1	2	2	4	4	1	1	2	2	2		2	3	8	53	20		2		2		1	6	5	2		2					2
吴俊娟	A	263	2	1	1945	11	71	1	2	1	4	4	1	2	2	2	2		2	1					2		2		2			2		1	2	3			3
韦世峥	A	264	1		1983	1	34	1	4	3	4		1	2	2	2	2		2	1					2		2		2			1	4	2					2
陈霞	A	265	2	2	1985	4	32	1	4	6	4	4	1	2	2	2	2		2	1					2		2		2			2		2					2
韦含悦	A	266	1		1951	7	66	1	3	6	3		1	2	2	2	2		2	2	10	53	60		2		2		2			2		2					3
蔡甫业	A	267	1		1966	4	51	1	2	6	3	4	1	2	2	2	2		2	2					1	10	2		2			1	5	2					2
吴川选	A	268	2	2	1965	6	53	1	2	2	4	4	1	2	2	2	2		2	1					1	7	2		1	4		1	3	2					2
张玉	A	269	2	2	1964	5	53	6	4	1	4	4	1	2	2	2	2		2	1					2		2		1	4		1	4	2					2
蔡桂妹	A	270	2	1	1957	7	60	1	1	2	3	4	1	1	2	3	2		2	1					2		2		2			2		2
吴川民	A	271	1		1967	10	50	1	3	6	3	4	1	2	2	2	2		2	3	30	10	10		1	20	2		2			1	3	2					2
吴焕锦	A	272	1		1962	5	55	1	4	1	4	4	1	2	2	2	2		2	1					2		1	1	2			2		2					2
冯金梅	A	273	2	1	1967	12	50	1	1	6	3	4	1	1	2	2	2		2	1					2	5	2		2			2		2					2
林南英	A	274	2	1	1955	5	62	1	2	2	3	4	1	1	2	3	2		2	1							1	5	1	4	2	1		2
蔡桂玉	A	275	2	1	1966	2	51	1	1	6	3	4	1	1	2	2	2		2	1					1	10	2		2			2		2					2
吴珊	A	276	2	2	1971	1	47	1	3	3	3	4	1	3	2	2	2		2	1					1	5	2		2			2		2					2
王秀南	A	277	2	2	1991	9	25	1	4	6	2	2	1	2	2	3	2		2	1					2		2		2			2		2					2
王永和	A	278	1		1967	12	49	1	4	1	1	4	1	1	2	2	2		2	1					2		2		2			2		2					2
黎泓标	A	279	1		1964	4	53	1	4	3	3	4	1	3	2	2	2		2	3	16	30	1				2		2			1	3	2					2
王光雄	A	280	1		1977	2	40	1		3	1		1	2	2	2	2		2	3	17	23	2		2		2		2			1	3	2					2
吴英凤	A	281	2	1	1965	6	52	1	3	6	1	4	1	3	2	2	2		2	1					2		2		1	4		2		2					2
郭振敬	A	282	1		1946	7	71	1	1	6	2		1	3	1	2	2		2	1					2		2		2			2		2					3
黄芬茹	A	283	2	2	1967	7	50	1	4	3	5	4	1	1	2	3	2		2	1					1	30	2		1	2		1	5	2					2
陈冰	A	284	2	2	1983	9	34	6	3	6	2	5	2	2	2	2	2		2	1					2		2		1	4		2		2					3
吴英銮	A	285	2	2	1964	5	53	1	3	6	1	4	1	3	1	1	2		2	1					1	25	2		2			2		2					2
吴军	A	286	1		1969	9	49	1	3	1	4	4	1	2	2	2	2		2	3	19	30	20		2		2		1	1		2		2					2
韦小妹	A	287	2	2	1980	5	37	1	4	3	5	4	1	3	1	2	2		2	1					2		1	4	2			1	4	2					2
朱淑妹	A	288	2	1	1967	5	51	1	1	2	3	4	1	3	1	2	2		2	1					1	30	2		2			2		2					2
郭学品	A	289	1		1973	10	44	1	5	6	2		1	3	1	2	2		2	1					2		2		2			2		2					2
方其超	A	290	1		1966	8	51	1	4	3	6	4	1	1	2	3	2		2	1					1	5	2		2			1	5	2					2
何德武	A	291	1		1971	5	45	1	3	1	3	4	1	1	2	2	2		2	1					1	20	2		2			2		2					2
陈雪芹	A	292	2	2	1978	9	39	1	4	3	1	4	1	2	2	2	2		2	1					1	20	1	7	1	7		2		2					2
为月玉	A	293	2	2	1978	10	39	1	4	3	1	4	1	3	1	1	2		2	1					2		1	3	1	6		1	4	2					2
李金书	A	294	1		1985	4	32	1	4	3	6	4	1	3	2	2	2		2	3	21	10	10		2		2		2			1	4	2					3
常青林	A	295	2	2	1982	6	34	1	4	3	5	4	1	3	2	2	2		2	1					2		2		2			2		2
孙桂香	A	296	2	1	1956	9	61	1	2	3	1		1	2	2	2	2		2	1					2		2		2			2		2					2
常生智	A	297	1		1955	5	62	1	3	2	1	4	1	2	2	2	2		2	3	18	10			1	30	2		2			2		2					2
陈英双	A	298	2	1	1945	9	72	1	1	6	2	4	1	3	1	2	2		2	1					2		2		2			2		2					3
符淑珍	A	302	2	1	1956	6	61						1	3	1	2	2		2	1					2		2		2			1	4	2					2
陈春妹	A	303	2	1	1957	6	60	1	2	2	2	4	1	2	2	2	1	6	2	1					2		2		2			2		2					3
冯所智	A	304	1		1953	3	65	1	2	2	2	4	1	2	2	2	2		2	3	20	45	20				2		2			2		2					2										1
王应华	A	305	1		1969	7	48	1	2	2	1		1	2	2	2	2		2	1					2		2		2			1	5	2					2
王应琛	A	306	1		1979	2	36	1		2	4		2	3	2	2	2		2	3	26	10	10		1	10	2		2			2		2					2
王琼秀	A	307	2	2	1981	6	36	1	3	3	4	4	1	2	2	2	2		1	1					1	10	2		1	1		2		2					2
王庆开	A	308	1		1962	10	54	1	5	6	6	4	1	3	2	2	2		2	2	30	23	10		2		2		2			2		2					2
陈川林	A	309	1		1952	11	65	1	3	6	4		1	1	2	2	2		2	3	35	30			1	30	2		2			2		2					1
郑孝梅	A	310	2	2	1954	1	63	1	3	1	4	4	1	3	2	2	2		2	1					2		2		1	3		1	5	2					2
王月燕	A	311	2	2	1990	10	26	1	4	6		5	1	1	2	2	2			1					2		2		2			2		2					2
吴敏	A	312	2	2	1963	11	46	1	3	3	5	4	2	3	2	3	2		2	1					1	30	2		2			2		2					2
吴翠卿	A	313	2	2	1967	4	50	1	4	1	1		1	2	2	1	2		2	1					1	20	2		2			2		2					2
吴翠影	A	314	2	1	1969	12	49	1	3	3	4	4	1		2	2	2		1	1					1	20	2		2			1	4	2					2
陈龙	A	315	1		1968	3	49	1	3	3	5		1		2		2		2	3		32	20		2		2		2			2		2					2
王朝扬	A	316	1		1974	9	43	1	2	6	1		1	2	2	2	2		2	3	15		20		1	42	2		2			2		2					2
吴翠贞	A	317	2	1	1957	7	60	1	2	6	2		1	2	1	1	2		2	1					2		2		2			2		2					2
陈春艳	A	318	2	2	1973	10	44	1	4	3	4	4	2	3	2	2	2		2	1					2		2		2			2		2					2
高江艳	A	319	2	1	1963	2	54	1	3	3	4	4	1	2	2	2	2		2	1					1	20	2		1	4		2		2					2
高文华	A	320	2	2	1972	5	45	1	3	6	2		1	3	2	3	2		2	1					2		2		2			2		2					2
王鹰	A	321	2	1	1966	9	50	1	4	3	4		1	2	2	2	2		2	1					1	26	2		2			2		2					2
梁振天	A	322	1		1968	9	48	1	2	6	2		1	2	2	2	2		2	1					2		2		2			2		2					2
邓秀萍	A	561	2	2	1961	3	58	1	3	6	5	4	1	2	1	2	2		2	1					1	20	2		2			2		2					2
郑曙琨	A	562	2	1	1972	4	45	1	4	6	3	4	1	2	2	2	2		2	1					1	45	2		2			2		2					2
左海东	A	563	1		1960	9	57	1	3	6	1	4	1	3	1	2	2		2	1	16	20	1		2		2		2			2		2					3
王朝霞	A	564	2	2	1976	12	41	1	2	4	4	4	1	2	2	2	2		2	1					2		2		2			2		2					2
夏泽英	A	565	2	2	1971	10	46	1	3	3	2	4	1	2	2	2	2		2	1					2		2		2			2		2					3
刘群智	A	566	2	1	1968	6	49	1	1	3	2	4	1	2	2	2	2		2	1					2		2		2			2		2					3
袁家胜	A	567	1		1969	12	48	1	2	6	2	4	1	2	1	2	2		2	1					2		2		2			2		2					3
王小红	A	568	2	2	1987	11	30	1	3	6	1	4	1	3	2	2	2		2	1					2		2		2			2		2					3
吴桂英	A	569	2	1	1962	7	55	1	1	6	1	4	1	3	2	2	2		2	1					2		2		2			2		2					3
陈晓娉	A	570	2	2	1990	10	27	6	4	3	3	5	1	2	2	2	2		2	1					1	23	2		2			2		2					2
黄心怡	A	571	2	2	1995	12	21	1	4	5	5	5	1	2	1	2	2		2	1					1	21	2		2			2		2					2
王瑞时	A	572	1		1984	2	33	1	4	6	3	4	1	2	2	2	2		2	1					2		2		2			2		2					2
唐美姣	A	573	2	2	1982	12	35	1	4	3	6	4	1	3	2	3	2		2	1					2		2		2			1	4	2					3
王靖茹	A	574	2	2	1988	10	29	1	4	3	2	5	1	3	1	2	2		2	1					2		2		2			2		2					2
陈局和	A	575	1		1982	8	35	1	3	3	4		1	2	1	2	2		2	1							2		2			2		2					2
尹叙陶	A	576	1		1987	4	30	6	4	3	1		1	3	2	2	2		2	3	18	12	5		2		2		2			1	4	2					2
王宇	A	577	1		1987	5	30	1	4	3	3		1	3	2	2	2		2	3	19	11	30		2		2		2			2		2					2
乐晶	A	578	2	1	1978	6	40	1	2	6	5	4	1		2	3	2		2	1							2		2			2		2					2
汪应华	A	579	1		1973	5	45	1	2	6	5	4			2	2	2		2	2	40	3			2		2		2			2		2					2
林子虎	A	580	1		1964	4	53	1	5	3	6	4	1	2	2	2	2		2	1					1	5	2		2			2		2					2
黄奇忠	A	581	1		1966	3	52	1	3	6	1	4	1	2					2	1					2		2		2	2				2
林丽莎	A	582	2	1	1965	12	52	1	2	6	4	4	1	2	2	2	2		2	1					2		2		2			2		2					2
杨丽	A	583	2		1982	5	35	1	4	3	5	4	1	2	2	2	2		2	1					2		2		2			2		2					3
周玉芳	A	584	2	1	1955	10	62	1	1	1	4	4			2	2	2		1	1					2		2		2			2		2
刘静花	A	585	2	2	1979	4	38	1	3	3	4	4		2	1	2	2		2	1					2		2		2			2		2					2
莫丽环	A	586	2	2	1982	6	35	1	3	6	1	4	1	2	2	1	2		2	1					1	10	2		2			2		2					2
丁春华	A	587	1		1974	5	43	1	4	6	5		1	2	1	2	2		2	1							2		2			2		2
朱永洪	A	588	1		1971	10	46	1	3	1	3		1	1	2	2	2		2	3					2		2		2			2		2					2
朱秋逸	A	589	2	2	1997	8	20	1	4	5	5	5	1	2	2	2	2		2	1					2		2		1	1		1	2	2					2
陈燕霞	A	590	2	2	1992	2	25	1	4	3	6	4	1	2	2	2	2		2	1					2		2		2			2		2					3
林美金	A	591	2	2	1961	12	56	1	3	3	4	4	1	2	2	2	2		2	1					1	25	2		1	7		2		2					2
王明华	A	592	2	1	1953	11	64		4		4		1	3	2	2	2		2	1					2		2		2			2		2
李立文	A	593	1		1979	12	38	1	4	3	2		1	3	1	2	2		2	2					2		2		2			1	3	2
乔孟莲	A	594	2	2	1968	4	49	1	3	3	5	4	1		2	2	2		2	1							2		2			2		2					2
杨秀华	A	595	2	2	1967	8	50	1	2	2		2	1		2	2	2		2	1					1	30	2		2			2		2					2
张特桃	A	596	2	1	1963	7	54	1	3	3	5	4	1	1	2	3	2		2	1					1		2		2			1	5	2					2
刘金雫	A	597	2	2	1970	4	47	1	2	1	5	4	1	2	2	3	2		2	1					1	15	2		2			2		2					2
卢何武	A	598	1		1983	6	34	1	2	6	4		1	2	2	1	2		2	3	15	19	15		1	15	2		2			2		2
杨延辉	A	599	1		1981	11	36	1	3	3	4		1	2	2	2	2		2	1					1	30	2		2			2		2					3
王金夫	A	600	1		1988	8	29	1	2	6			1	1	2	2	2		2	3	18	11	20		1	10	2		2			2		2
杨华	A	601	1		1975	3	42	1	4	3	4				2	2	2		2	3	20	22			1		2		2			2		2					2
许家文	A	602	1		1983	7	34	1	4	3	5		1	3	2	2	2		2	1					2		2		2			1	3	2		5			2
许靳华	A	603	2	1	1966	11	51	1	4	3	2	4	1	3	1	1	2		2	1					1		2		2			2		2					2
高喜芳	A	604	1		1978	12	39	1	4	3	5	4	1	2	2	2	2		2	3	39	20	20		1		2	7	2	7		1	4	2					2
刘志朝	A	605	1		1981	8	36													3	16	20	20		1		2		2		5	2		2					3
吉娆兰	A	606	2	2	1984	3	33	1	4	3	6	4	1	3	2	2	2		2	1					1	10	2		2			2		2
吴浚春	A	607	1		1964	5	53	1	3	3	5	4	1	2	2	2	2		1	1					1	20	2		2			2		2					2
杨祝丽	A	608	2	1	1964	1	53	1	4	6	3	4	1	2	1	2	2		2	1					1		1	1	1	1	5	2		2					2
鲁祖怡	A	609	2	2	1985	8	32	6	4	3	3	4	1	2	2	2	2		2	1					2		2		2			1	14	2					2
覃业美	A	610	1		1948	10	69	1	3	4	5	4	1	3	2	3	2		2	1							2		2			2		2					3		1		1
黄琼荣	A	611	2	1	1955	8	60	1	3	6	4	4	1	2	2	3	2		2	1					2		2		2			2		2
程艳琼	A	612	2	2	1975	6	42	1	1	3	3	4	1	1	1	2	2		2	1					1		2		2			2		2					2
吴多喜	A	613	1		1953	11	64	1	3	6	1		1		2	2	2		2	1					2		2		2			1	3	2
刘金娥	A	614	2	2	1970	7	47	1	0	3	3	1	1	1	1	2	2		2	1					2		2		2			2		2
陈亚梅	A	615	2	1	1966	8	51	1	1	3	3	1	1	2	2	2	2		2	1					1	15	2		2			2		2					2
张雁强	A	616	1		1970	8	47	1	3	4	4	4	1	2	2	1	2		2	1					1	20	2		2			1	3	2					2
刘美蓉	A	617	2	2	1965	5	52	1	2	1	2	4	1	2	2	3	2		2	1					1	20	2		2			1	4	1	1	5			2
王康彬	A	618	1		1988	10	28	1	2	6	4		1	2	2	2	2		2	3	6	23	30		1	20	2		2			2		2					2
袁熙兰	A	619	2	2	1975	8	42	1	3	3	4	4	1	1	2	3	2		2	1					1	20	2		2			2		2
欧永红	A	620	2	1	1961	11	56	1	3	4	2	4	1	2	2	2	2		2	1					2		2		2			2		2					2
陈云亮	A	621	1		1982	10	35	1	4	2	6		1	1	2	2	2		2	2	30				1	2	2		2			2		2					2
陈亚茹	A	622	2	1	1959	12	58	1	3	6	4	4	1	3	2	3	2		2	1					2		2		2			2		2					2
刘海霞	A	623	2	2	1967	11	50	1	3	3	3	1	1	2	1	1	2		2	1					1	30	2		2			2		2					2
王海春	A	624	2	2	1971	1	46	2	0	3	3	4	1	1	2	3	2		2	1					2		2		2			2		2
程晶	A	625	2	1	1960	6	57	1	3	6	4	4	1	2	1	2	2		1	3					2		2		2			2		2					2
李雪	A	626	2	2	1990	2	26	1	5	5	2	2	1	2	2	2	2		2	1					2		2		2			2		2					2
蔡秀明	A	628	2	1	1971	9	46	1	2	1	1	4	1	3	2	2	2		2	1					1	20	2		2			2		2					2
李秀浓	A	629	2	1	1973	5	44	1	2	1	1	4	1	3	2	2	1	6	2	1					2		2		2			2		2
陈茂宁	A	631	1		1963	10	54	1	2	6	1		1	3	2	2	2		2	3	20				2	30	2		2			2		2					3
陈珊	A	632	1		1963	7	54	1	3	1	4		1	3	2	1	2		2	1					2		2		2			2		2					2
陈淑娟	A	633	2	1	1962	7	55	1	3	2	1	4	1	3	2	3	2		2	1					2		2		2			2		2					3
程守杏	A	634	2	2	1975	9	42	1	4	4	4	4	1	3	2	3	2		2	1					1	5	1	1	1	1		1	3	2					2
许天尾	A	635	2		1972	11	45			2			1		2	2	2		2	1					2		2		2			2		2
何丽凤	A	636	2	2	1988	11	28	1	2	1	5	4	1	3	2	2	2		2	1					2		2		2			2		2
胡淑英	A	637	2		1974	12	42	6	0	2	1	4	1	2	2	3	2		2	1					2		2		2			1	3	2
郑兰娃	A	638	2	1	1954	8	63	1	2	6	4	4	1	2	2	2	2		2	1					2		2		2			2		2
丁仕华	A	639	1		1979	8	38	1	4	3	5		1	2	2	2	2		2	3		2			2		2		1	1		2		2					2
陈长胜	A	640	1		1948	8	69	1	2	2	5	4	1	2	2	2	2		2	1					2		2		2			2		2					2
吴春花	A	641	2	2	1973	2	44	1	2	4	5	4	1	2	2	2	2			1					2		2		2			2		2					3
欧伦常	A	642	1		1940	11	76	1	2	1	5	4	1	2	2	2	2		2	1					2		2		2			2		2
杨丹姑	A	643	2	1	1944	3	73	1	2	4	5	4	1	2	2	2	2		2	1					2		1	2	1	2		2		2
欧德军	A	644	1		1973	10	43	1	3	3	5	4	1	2	2	2	2		2	3	15	25	30		1	25	1	1	2			2		2					2
张勇	A	645	1		1975	1	42	1	3	3	5	4	1	2	2	2	2		1	3	22	20	5		2		2		2			2		2					2
欧瑞宁	A	646	2	2	1972	7	45	1	2	1	3	4	1	3	2	2	2		2	1					2		2		2			2		2					2
王娟	A	647	2	1	1996	7	51	1	1	2	1	4	1	2	2	2	2		2	1					1	37	2		2			2		2					2
郑真兰	A	648	2	1	1953	10	64	1	1	2	1	4	1	2	2	2	2		2	1					1	40	2		2			2		2					2
石军	A	649	1		1955	12	62	1	4	1	1		1	3	1	1	2		2	1					2		1	1	2			2		2					2
王才香	A	650	2	1	1954	7	63	1	2	2	4	4	1	2	2	2	2		2	1					2		2		2			2		2					2
范雄方	A	651	1		1956	7	61	1	3	6	2		1	2	2	2	2		2						2		2		2			2		2					2
周长容	A	652	2	1	1957	12	59	1	4	6	5	4	1	3	2	2	2		2	1					2		2		1	4		1	5	2					2
何魅帝	A	653	1		1959	4	58	1	3	2	2		1	2	2	2	2		2	3	20		40		1		2		2			2		2					2
李凤妹	A	654	2		1973	8	44	1	4	6	5	4	1	3	2	3	2		2	1					2		1	1	1	1		1	34	2					2
陈汉辉	A	655	2	1	1948	6	69	1	1	6	1	4	1	3	2	2	2		2	1					2		2		2			2		2
陈仁亮	A	656	1		1994	10	22	1	4	6	6	4	1	2	2	2	2		2	3	20	3	20		2		2		2			2		2
陈仁交	A	657	2		1983	1	34	1	2	6	3	4	1	2	2	2	2		2	1					2		2		2			1		2					2
陈仁青	A	658	2	2	1986	9	31	1	2	3	3	1	1	3	2	2	2		2	1					2		2		2			1	23	2
陈仁够	A	659	2	2	1989	10	27		1	3	4	5	1	3	2	2	2		2	1					1	5	2		2			1		2
陈仁得	A	660	1		1992	3	25	1	3	3	2	5	1	2	2	3	2		2	3	18	7	7				2		2					2
郑开莲	A	661	2	1	1962	8	55	1	2	2	5	4	1	2	2	2	2		2	1					2		2		2			2		2					3
高文芳	A	662	2	1	1959	8	59	1	2	1	5	4	1	3	2	3	2		2	1					1	20	1	1	1	1		1	4	2
王侠	A	664	2	2	1976	5	41	1	2	6	3	4	1	2	2	3	2		2	1					1	18	1	1	1	1		2		2					2
林放	A	665	1		1958	12	59	1	3	1	3	4	1	2	2	2	2		2	3	18	41	20		2		2		2			2		2					2
周玉梅	A	666	2	1	1958	3	59	1	2	3	5	4	2	2	2	3	2		2	1					2		2		2			2		2
李凤南	A	667	2	2	1963	11	53	1	3	6	5	4	1	3	2	2	2		2	1					2		1	1	1	1		1	34	2					2
林小琼	A	668	2	1	1970	5	47	1	3	3	6	4	1	2	2	2	2		1	1					1	20	1	1	1	3		2		2					2
吴玉芳	A	669	2	1	1957	1	60	1	2		3	4	1	3	2	1	2		2	1					2		2		2			2		2
钟祥梅	A	670	2	1	1947	5	70	1	1	4	5	4	1	2	2	2	2		2	1					2		2		2			2		1	1	2			2
陈英情	A	671	2	2	1975	6	42	1	3	1	4	1	1	3	2	2	2		2	1					2		2		2			1	5	2					2
麦忠霞	A	672	2	2	1991	8	26	1	4	3	6	5	2	3	2	2	2		2	1					1	2	2		2			2		2					2
杨海东	A	674	1		1970	10	47	1	4	6	5		1	2	2	2	1	6	2	1					2		2		1	4		2		2					3
杨子龙	A	675	1		1990	10	27	1	4	3	2			2	2	2	2			3	18	9			2		2		2			2		2
史振利	A	676	1		1969	12	47	1	3	1	5	4	1	2	1	2	2		2	2					2		2		2			2		2
梁坚妹	A	677	2	2	1992	6	25					5	1		2	2	2		2	1					2		1	4	2			2		2
梁邓里	A	678	1		1990	2	27	1	0	3	1		1	2	2	2	2		2	3	18	9	20		2		1	1	2			1	3	2
陈英菊	A	679	2	1	1963	7	54	1	1	2	3	4	1	3	2	3	2		2	1					1	2	1	4	1	4		1	3	2					2
杨景胜	A	680	1		1954	4	62	1	2	1	3		1	3	1	1	2		2	3		40	20		1	10	1	3	2			2		2					2
宋振华	A	681	2	1	1953	8	62	1	2	1	4	4	1	3	2	2	2		2	1					1	30	2		2			2		2
蒋翠华	A	683	2	1	1964	6	53	1	2	2	4	4	1	3	2	2	2		2	1					1	30	1	1	2			1	4	2					2
陈文银	A	684	2	2	1987	11	29	1	4	6		5	1	2	2	2	2		2	1					2		1	5	2			2		2
王杏宝	A	685	1		1989	3	28	1	4	6	5		1	2	2	3	2		2	1					2		2		2			2		2
赵平	A	686	1		1983	4	34	1	4	6	2		1	2	1	2	2		1	2					2		2		2			2		2
陈文君	A	687	2	2	1985	7	31	1	4	6	3	1	1	2	1	2	2		2	1							1	5	2			2		2					2
钟贝贝	A	688	2	2	1989	8	28	1	4	3	4	4	1	2	2	2	2		2	1					2		1	1	1	14		2		2					3
谭巧莉	A	689	2	1	1965	9	52	1	2	6	2	4	1	2	2	2	2		2	1					1	20	1	1	1	1		1	4	2					2
王园园	A	690	2	2	1973	5	44	1	4	6	2	4	1		2	2	2		2	1					1	10	2		2			1	34	2					3
王浩	A	691	1		1983	5	34	1	3	3	6		1	2	1	2	2		2	3	17	17	15		2		1	34	2			2		2					2
黄培琴	A	692	2	2	1988	5	29	1	4	6	5	4	1	2	2	2	2		2	1							2		2			2		2					2
苏才雪	A	693	2	2	1982	8	36	1		3	2	4	1		2	3	2		2	1							1	1	2			1	3	1	3	3			3
何丽	A	694	2	2	1978	2	39	1	4	6	5	4	1	2	2	2	2		2	1					2		1	1	1	1		1	35	2					2
陈开荣	A	695	1		1974	11	43	1	4	3	4		1	2	2	2	2		2	1					2		2		2			2		2					2
林明玑	A	696	1		1946	8	71	1	3	2	2	4	1	3	2		2		2	1					1	5	1	1	2			2		2					3
吉训英	A	697	2	1	1954	6	63	1	1	2	1	4	1	3	2	3	2		1	1					1	20	2		2			2		2					2
钟焕凤	A	698	2	1	1961	12	55	1	3	6	5	4	1	3	2	2	2		2	1					2		2		2			2		2					2
陈燕云	A	699	2	2	1981	4	36	1	4	3	6	4	1	3	2	2	1	6	2	1					2		1	1	2		5	1	4	2					2
黄华英	A	700	2	1	1957	10	60	1	2	6	4	4	1	1	2	2	2		2	1					2		2		2			2		2					2
肖莉萍	A	701	2	1	1964	4	53		3	6	3	1	1	3	2	2	2		2	1					2		1	7	2			1	3	2					2
高净	A	702	2	2	1982	7	35	1	4	3	2	4	1	2	2	3	2		2	1							2		1	1		2		2					2
邓余珍	A	703	2		1971	10	46	1	2	2	3	4	1	3	2	2	2		2	1					1	10	2		2			2		2
吴树凰	A	705	1		1975	10	42	1	4	3	6		1	3	2	2	2		2	2					2		2		2			2		1	3	2	2	4	2
符贤芳	A	706	2	2	1986	5	31	1	4	3	4	5	1	2	2	2	2		2	1							2		2			2		2					2
邢碧珠	A	707	2	1	1953	7	64	1	3	6	3	4	1	2	2	2	2		2	1					1	2	2		2			2		2					2
符小欢	A	708	2	2	1982	9	36	1	4	3	5	4	1	2	2	2	2		2	1					2		2		2			1	3	2					2
黄丽萍	A	709	2		1971	11	45	1	3	3	2	4	1	3	1	2	2		2	1					1	20	2		2			2		2
陈亚定	A	710	1		1970	8	47	1	2	2	1	4	1	2	2	3	2		2	1					2		2		2			2		2					2
秦少印	A	711	2	1	1971	4	46	1	1	2	1	4	1	2	2	3	2		2	1					1		1	1	1	1		2		2					2
吴海燕	A	712	2	2	1971	5	46	1	3	4	3	4	1	3	2	1	2		2	1					1	15	2		2			2		2					2
吴珏玲	A	713	2	2	1982	4	35	1	3	3	2	4	1	3	2	2	2		2	1					2		2		2			1	4	2					3
陈伟超	A	714	1		1977	3	42	1	4	3	3	4	1	2	2	3	2		2	1					2		2		1	4		2		2
许卫东	A	715	1		1967	11	49	1	3	6	4		1	3	2	2	2		2	3		20	20		2		2		1	1		1	4	2					2
王晓彤	A	716	2	2	1987	8	30	1	3	4	1	3	1	1	2	2	2		2	1					1		2		2			2		2					2
王李艳	A	717	2	2	1978	6	39	1	4	6	5	4	1	2	2	2	2		2	1					2		1	1	2			2		2					2
王永英	A	718	2	2	1982	1	36	1	4	6	3	4	1	2	2	2	2		2	1					2		1	1	1	1		2		2					3
邢永放	A	719	1		1973	12	43	1	4	1	3		1	3	2	2	2		2	2	16	27			2		2		2			2		2					2
刘亚芝	A	720	2	1	1955	8	62	1	3	6	3	4	1	3	1	1	2		2	1					1	50	2		2			2		2					2
郑世玉	A	721	1		1953	3	64	1	3	6	4	4	1	3	2	3	2		2	1							2		2			2		2					2
高书明	A	722	1		1955	8	62	1	1	2	1	4	1	2	2	2	2		2	1					2		2		2			2		2					2
陈育娟	A	723	2	2	1981	2	36	1	3	2	2	4	1	3	1	2	2		2	1					1	10	2		2		2	2		2					2
刘胜明	A	724	2		1973	8	44	1	2	6	6	4	1	3	2	1	2		2	1					2		2		2			1	3	2
崔咪咪	A	725	2	2	1992	6	25	1	3	5	1	4	1		1	2	2		2	1							1	1	2			2		2					2
陈明基	A	726	1		1970	7	47	1	2	3	3	4	1	3	2	2	2		2	2					2		2		2			2		1	1	2		1	2
符燕玉	A	727	2	1	1968	2	49	1	3	6	2	4	1	3	1	2			2	1					2		2		2			2		2					2
吴维雄	A	728	1		1958	12	58	1	3	6	1	4	1	1	2	3	2		2	1					2		2		2			2		2					2
洪丽	A	729	2	2	1973	12	44	1	1	1	3	4	1	3	1	2	2		2	1							2		1	1		2		2
陈琼莉	A	730	2	2	1980	9	37	1	2	1	3	4	1	2	2	2	2		2	1					2		1	1	2			2		2
谢华容	A	731	2	2	1980	2	37	1	2	1	3	4	1	2	2	2	2		2	1					2		2		2			2		2
郑永清	A	732	2	2	1961	4	56	1	3	6	6	4	1	2	1	1	2		2	1					1	10	2		2			2		2					2
王菲	A	733	2	2	1989	2	28	1	4	3	6	4	1	3	1	2	2		2	1					2		1	34	2			1	4	2					2
许畅仁	A	734	1		1978	8	39	1	4	3	5	4	1	3	2	2	2		1	2		8			2		1	1	2			2		2
许畅贤	A	735	1		1974	2	43	1	4	1	6		1	2	2	2	2		1	1					2		1	4	1	4		2		2					3
蒋琼莲	A	736	2	1	1962	9	55	1	3	6	1	4	1	3	2	2	2		2	1					2		1	1	2			2		2					2
周生文	A	737	2	2	1989	9	28	1	4	6	1	4	1	3	2	2	2		2	1					2		1	1	2			2		2					2
杨引香	A	738	2	1	1962	9	55	1	0	2	3	4	1	3	1	1	2		1	1					2		1	1	1	2		1	4	1	1	5	7		3
周玉香	A	739	2	2	1965	5	52	1	1	2	4	4	2	3	2	2	1	6	2	1					2		1	1	1	1		2		2					3
邢益明	A	740	1		1983	6	34	1	2	1	1		1	3	2	2	2			3	18	15	15		1	15	2		2			1	3	2
梁亚燕	A	741	2	1	1985	6	32	1	2	6	1	4	1	3	2	2	2										2		1	1	5	2		2	3	5
谢文姬	A	742	2	1	1968	7	49	1	1	6	1	4	1	3	1	2	2		2								2		2			1	12345	2
古广有	A	743	1		1968	11	49	1	2	6	1		1	3	1	2	2			3	20	29	40		2		2		2			1	3	2	3
王美花	A	744	2	2	1980	1	37	1	2	1	3	4	1	3	2	2	2		2	1					1	15	2		1	1		1	3	2					3
王茀兴	A	745	1		1939	3	78	1	3	6	5		1	3	2	2	2		1	1					2		2		1	1		2		2					2
王雄	A	746	1		1971	3	46	1	3	6	2		1	3	2	2	2		1	1					2		1	7	2			2		2					2
周育宗	A	747	1		1971	5	47	1	4	6	5	4	1	3	2	2	2		2	1					1	20	2		2			2		1	3		1		2
黄忠华	A	748	1		1968	8	49	1	2		3		1	2	2	2			2	3	15	34	30				2		2			2		2
吴纪昌	A	749	1		1983	8	34	1	4	3	5	4	1	3	1	2	2		2	1					2		2		2			2		2					2
唐其政	A	750	1		1975	8	43	1	3	2	5	4	1	3	2	2	2		2	1					2		2		2			2		2
林乙兰	A	751	2	2	1978	7	39	1	3	6	3	1	1	2	2	2	2		2	1					2		2		2			2		2					2
林敏	A	752	2	2	1995	12	21	1	4	5			1	3	2	2	2		2	1					1	3	2		2			2		2					2
林惠芬	A	753	2	2	1957	11	60	1	3	6	3	1	1	3	2	2	2		2	1					2		2		2			2		2					2
尤金梅	A	754	2	2	1989	3	28	1	4	3	4	4	1	3	2	2	2		2	1					2		2		2			2		2
陈圣连	A	755	1		1980	10	37	1	1	2	2		1	2	2	2	2		2	3	27	10	30				2		2			2		2
张海娟	A	756	2		1973	9	44	1	2	6	4	4	1	3	2	1	2		2	1					1	20	2		2			2		2
陈锐伟	A	757	1		1959	10	58	1	3	6	4		1	2	2	1	2		2	3	24	34	30				2		2			2		2
周东彪	A	758	1		1970	5	47	1	4	6	5	4	1	3	2	2	2		1	1					2		2		2			2		2
韩明光	A	759	1		1959	12	58	1	3	2	2	4	1	2	2	2	2		2	1							2		2			2		2					2
陈小明	A	760	1		1976	11	41	1	4	3	5	4	1	3	2	2	2		2	1					2		1	1	2			1	1	2
张朝晖	A	761	1		1958	11	68	1	3	3	2		1	2	2	2	2		2	1					1	6	2		2			2		2					2
钟兴梅	A	763	2	2	1978	10	39	1	2	3	5	4	1	1	1	2	2		2	1					1	20	2		2			2		2					2
梁海娇	A	764	2	1	1973	1	44	1	2	3	3	1	1	2	2	2	2		2	1					2		2		1	2		2		2					2
陈平	A	766	1		1957	3	60	1	4	1	4	4	1	2	2	2	2		2	3					2		2		2			1	5	2					2
徐雪兰	A	767	2	1	1956	4	61	1	4	1	4	4	1	2	2	2	2		2	1					2		2		2			2		2					2
郭泽斌	A	768	1		1981	10	36	1	3	3	5	4	1	2	2	2	2		2	3	22	14	20		2		2		2			1	4	2					2
林乙梅	A	769	2	2	1976	11	40	1	3	1	3	4	1	3	2	3	2		2	1					2		2		2			2		2					2
郑凤兰	A	770	2	2	1949	10	68	1	0	4	3	4	1	1	2	2	2		2	1					2		2		2			2		2
王业丰	A	771	1		1948	2	69	1	1	4	3	4	1	1	2	2	2		2	1					2		2		2			2		2					3
肖献策	A	772	1		1988	11	29	1	4	3	1	5	1	2	2	2	2		2	3	16	13	9		2		2		2			2		2					2
王录杰	A	773	1		1964	3	53	1	3	2	3		1	2	2	2	2		2	1							2		2			2		2					2
罗崇伟	A	774	1		1987	10	30	1	4	3	3		1	2	2	2	2		2	2	22				1	30	2		2			2		2					2
任启川	A	775	2	1	1958	12	58	1	3	4	1	4	1	3	1	2	2		2	1					2		2		2			2		2					2
曾燕	A	776	2	2	1978	3	39	1	4	3	3	4	1	3	2	2	2		2	1					1	2	2		2			2		2					3
刘家玲	A	777	2	2	1956	3	61	1	3	6	6	4	1	3	2	2	2		2	1					2		2		2			2		2
李菊	A	778	2	1	1969	4	48	1	2	2	4	4	1	3	2	3	2		2	1					1	20	2		2			2		2					2
王秀琼	A	779	2	2	1941	4	76	1	1	2	5	4	1	2	2	2	2		2	1							1	1	2			2		2					2
吴梅桂	A	780	2	2	1955	6	62	1	1	2	3	4	1	3	2	2	2		2	1							2		2			2		2					2
苏发巍	A	781	1		1982	11	35	1	4	6	1		1	2	2	2	2		2	1					2		1	16	1	4		1	4	2					2
王丽梅	A	782	2	2	1983	4	34	1	4	3	6	4	1	2	2	3	2		2	1					2		2		1	14		2		2					2
冯锦诚	A	784	1		1954	12	63	1	3	6	5		1	1	2	3	2		2	1					1	20	2		1	7		2		2
冯崇媚	A	785	2	1	1949	5	68	1	2	2	6	4	1	2	2	2	2		2	1					2		2		1	7		2		2
王柏	A	786	1		1964	4	53	1	4	3	5	4	1	1	2	3	2		2	1					2		1	4	2			2		2					2
王燕	A	787	2	1	1955	7	62	1	1	4	2	4	1	2	2	2	2		2	1							2		2			2		2					2
郭昭雅	A	788	2	2	1972	7	45	1	3	3	4	4	1	2	2	2	2		2	1					1	20	2		2			2		2
郭昭飞	A	789	2	2	1971	3	46	1	4	3	4	4	1	2	2	2	2		2	1					1	20	2		2			2		2					2
吴秋虹	A	790	2	2	1965	9	52	1	3	4	3	4	1	2	2	2	2		2	1					1	30	2		2			2		2					2
徐健	A	791	1		1971	2	46	1	4	3	1		1	2	1	2	2		2	3	26	20	20		1	20	2		2			2		2					2
王丹	A	792	2	2	1990	12	27	1	2	4	2	4	1	2	2	2	1	6	1	1							2		1	1		2		2					2
李选莉	A	793	2	2	1992	2	25	1	4	3	5	5	1	2	1	2	2		2	1					1	25	2		1	1		2		2					2
符集颜	A	794	2	2	1992	11	24	1	4	3	5	5	1	3	1	2	2		2	1					1	24	2		2			2		2					2
胡诗胜	A	795	1		1972	9	45	1	4	6	5	4	1	2	2	2	2		2	1					2		2		2	1		1	4	1	3	4	3	1	2
陈晓娟	A	796	2	2	1994	6	23	1	4	3	4	5	1	2	2	1	2		2	1					2		2		2			1	3	2
吕诗光	A	797	1		1962	8	55	1	2	3	3		2	1	2	3	2		2	1					2		2		1	1		2		2
符水娥	A	798	2	2	1970	1	47	1	1	2	3	4	1	2	1	2	2		2	1					2		2		2			2		2
李平彬	A	799	1		1984	10	33	1	4	1	4		1	1	2	3	2		2	3	23	10	20		2		2		2			1	3	2					2
彭亚联	A	800	2	1	1987	10	30	1	2	1	3	4	1	2	2	2	2		2	1					2		2		2			2		2
胡旭连	A	801	2	2	1980	10	37	1	2	2	1	4	1	2	2	2	2		2	1					2		2		2			2		1	2				2
符关瑞	A	802	1		1978	6	39	1	2	2	1		1	1	2	3	2		2	3		20	30		1		2		2			2		2					2
吴清龙	A	803	1		1990	8	27	1	3	3	1		1	3	2	2	2		2	2	20	7	5		1		2		2			1	3	2					3
吴多毛	A	804	1		1964	12	53	1	2	2	1	4	1	2	1	2	2		2	1					1		2		2			1		1	1	2	2	1	1								1
梁小燕	A	805	2	2	1986	11	31	1	4	3	3	4	1	3	2	3	2		2	1					2		2		2			2		2
周小燕	A	806	2	2	1973	3	43	1	2	1	1	4			2		2		2						2		2		2					2					2
陈利	A	807	1		1990	8	27	1	4	3	3		1	2	2	2	2		2	1					2		2		2			1	3	2					2
王小英	A	808	2	1	1979	9	38	1	2	1	3	4	1	3	1	2	2		2	1					2		2		2			2		2
胡旭为	A	809	2	2	1978	2	39	1	1	4	1	4	1	2	2	2	2		2	1					1		2		2			1		1	2
吴清仍	A	810	1		1950	1	67	1	1	2	4	4	1	2	2	2	2		2	3	61	6	23		2		2		2			2		2					2
王梅香	A	811	2	2	1974	10	42	1	2	6	3	4	1	3	2	2	2		2	1					2		2		2			2		2					2
冯春娇	A	812	2	2	1980	11	37	1	4	3	4	4	1	2	2	2			2	1					2		2		1	7		2		2
孙敏侠	A	813	2	1	1955	9	62	1	0	6	3		1	1	1	1	2		2	1					2		2		2			2		2
钟德凤	A	814	2	1	1963	12	54	1	2	4	5	4	1	3	2	2			2	1					1	30	2		2			1	5	1	1	2		12	2
杨桂英	A	815	2	2	1966	12	51	1	1	2	3	4	1	3	2	2	2		2	1					2		2		2			2		1	3	2	5	12
李博源	A	816	1		1960	3	57	1	1	6	1	4	1	2	2	3	2		2	2	40	17	20				2		1	1		1	5	1	3	2		1	1
吴妚三	A	817	2	2	1969	12	48	1	2	2	4	4	1	2	2	2	2		2	1					2		2		2			2		2
张可家	A	818	1		1972	8	45	1	2	2	4	4	1	2	2	2	2		2	3		25			1		2		2			2		2
吴大坚	A	819	1		1968	11	49	1	1	2	3	4	1	2	2	2	2		2	1					2		2		2			2		2
陈英	A	820	2	2	1983	8	34	1	3	4	3	4	1	2	2	2	2		2	1					2		1	1	2			2		2
钟璐青	A	821	2	1	1974	10	43	1	4	3	5	1	1	3	2	2	2		2	1					2		2		2			2		2
王梅英	A	822	2	1	1954	4	63	1	1	2	3	2	1	3	2	3	2		2	1					2		2		2			2		2					2
吴小玲	A	823	2	2	1994	3	24	1	4	3	3	5	1	2	2	1	2		2	1					2		2		2			2		2
钟小菊	A	824	2	2	1973	11	43	1	4	6	5	4	1	3	2	2	2		2	1					1	17	2		2			2		2					2
冯学森	A	825	1		1940	5	77	1	3	6	3		1	2	2	2	2		2	1					2		2		2			2		2
王安凤	A	826	2	2	1947	5	70	1	3	3	4	1	1	2	2	3	2		2	1					2		2		1	1		1	3	1	3	2		2
杜俊峰	A	827	1		1955	3	63	1	2	2	1		1	2	2	1	2		2	1							2		2			2		2					2
张玉芝	A	828	2	2	1988	7	29	1	5	3	6	4	1	3	2	2	2		2	1					1	4	1	3	1	34		2		2					2
符忠	A	829	1		1971	12	46	1	4	3	4		1	2	2	2			2	2							1	1	2			2		2
谢亚平	A	830	2	2	1975	8	42	1	2	1	3	4	1	2	2	2	2		2	1					2		2		1	1		2		2
林尤明	A	831	1		1978	7	40	1	2	1	4		1	1	2	2	2		2	1					1	6	2		2			2		2					2
樊雁凌	A	832	2	2	1969	11	48	1	4	6	5	4	1	2	1	1	1	6	1	1					1	30	2		1	2		2		1	2		1
许桂荣	A	833	2	1	1960	6	57	1	3	6	4	4	1	2	2	2	2		2	1					2		2		2			2		2
吴秀春	A	834	2	1	1939	3	78	1	2	6	6	4	1	2	2	2	1	6	2	1							1	1	1	1		1	6	2					2
吴乾浓	A	835	1		1960	3	57	1	4	1	3		1	2	1	2	2		2	1					2		2		2			2		2
王芝芝	A	836	2	2	1996	9	21	6	4	3	4	5	1	2	2	2	2		2	1					2		1	3	2			2		2					2
郭桂云	A	837	1		1958	2	59	1	2	1	5		1	2	2	2	2		2	1	18	30	15		1		2		2			2		2					2
郭林	A	838	1		1984	11	33	1	3	3	6		1	2	2	2	2		2	1					2		2		2			2		2					2
卢亦勤	A	839	2	2	1994	1	23	1	4	3	5	5	1	2	2	2	2		2	1					2		2		2			2		2					2
莫泰娇	A	840	2	2	1991	11	26	1	2	3	3	4	1	3	2	1	2		2	1					2		1	1	2			1	4	2					2
陈秀娥	A	841	2	1	1947	11	71	1	4	6	5	4	1	1	2	3	2		2	1					2		2		2			2		1	2				1	1							1
冯所环	A	842	1		1950	7	67	1	2	1	4		1	3	2	2	2		2	3	16	14	20		2		1	1	2			2		2					2
冯学望	A	843	1		1983	1	34	1	3	3	4	4	1	3	2	2	2		2	3	20	14	20		1		2		2			2		2
林桂英	A	844	2	1	1950	7	67	1	3	6	3	4	1	3	2	2	2		2	1					2		2		1	4		2		2					2
黄衡	A	845	2	2	1996	8	21	1	4	5		5	1	2	1	2	2		2	1					1	21	2		2			2		2					2
李秋霞	A	846	2	2	1966	1	51	1	2	6	4	4	1	3	2	2	2		2	1					1	8	1	2	2			2		2
王雪英	A	847	2	2	1984	7	33	1	2	4	4	1	1	3	2	2	2		1	1					2		2		2			2		2					2
陈红娥	A	848	2	2	1969	8	48	1	4	6	1	4	1	3	2	3	2		2	1					1	20	2		2			2		2
陈红竹	A	849	2	2	1966	8	51	1	3	3	3	4	1	2	2	3	2		2	1					1	20	2		2			2		2
陈瑞芳	A	850	2	2	1980	10	37	1	4	6	4	4	1	2	2	2	2		2	1					2		1	7	2			2		2
王世莲	A	851	2	2	1970	12	44	1	2	6	3	4	1	2	2	3	2		2	1							2		2			2		2					2
王春琴	A	852	2	1	1964	10	52	1	2	1	3	4	1	2	2	3	2		2	1					2		2		2			2		2					2
王春兰	A	853	2	1	1961	12	56	1	3	6	2	4	1		2	3	2		2	1					1		2		2			2		2
蔡新花	A	854	2	1	1962	7	55	1	1	1	5	4	1	3	2	2	2		2	1					1	5	2		2			2		2					2
王大光	A	855	1		1959	11	58	1	3	6	5	4	1	2	2	2	2		2	1							2		2			2		2					2
袁会任	A	856	1		1942	8	75	1	1	2	2		1	2	2	3	2		2	1							1	1	2			2		2
林小防	A	857	2	2	1988	12	28	1	3	4	5	5	1	3	2	2	2		2	1							2	2	2			2		2					2
钟玛丽	A	858	2	1	1961	11	55	1	2	4	5	4	1	3	2	2	2		2	1							2		2			2		2					2
吴玉金	A	859	2	1	1962	10	55	1	3	6	4	4	1	2	2	2	1	6	2	1					2		2		1	7		1	5	2
郭应球	A	860	1		1963	4	54	1	4	6	6		1	2	2	1	2		2	1					2		2		2			2		2					2
胡春兰	A	861	1		1966	1	51	1	2	1	4		1	3	2	2	2		2	3	20	31	20		1	31	2		2			2		2					2
钟恢庆	A	862	1		1976	2	41	1	3	6	4		1	2	2	2	2		2	3	25	16	2		2		2		1	2		1	3	2					2
陈少红	A	863	2	1	1967	7	50	1	3	3	3	4	1	2	2	1	2		2	1					2		1	1	1	16		2		2					2
陈少玲	A	864	2	1	1964	3	53	1	3	6	5	5	2	2	2	3	2		2	1							1	1	1	1		2		2					2
翁春娇	A	865	2	1	1953	6	64	1	1	4	2	4	1	1	2	2	2		2	1					2		2		2			1		2
翁启标	A	866	1		1976	3	41	1	4	3	5		1	2	2	2	2		2	3	20	21	15		1	21	2		2			2		2					2
朱竹山	A	867	1		1955	4	62	1	2	1	3		1	3	2	2	2		2	1					2		2		2			2		2
吴玉娇	A	868	2	1	1965	11	52	1	2	1	5	4	1	2	2	2	2		2	1					2		2		2			2		2					2
林乙星	A	869	2	2	1980	4	37	1	4	3	5	4	1	3	2	2	2		1	1					1	10	2		2			2		2					2
姜继群	A	870	1		1961	8	56	1	3	1	5	4	1	2	2	2	2		1	3	30	26	10		2		2		2			2		2					2
陈彩妹	A	871	2	2	1973	7	44	1	3	1	6	4	1	3	2	2	2		2	1							2		2			2		2					2
刘家榆	A	872	2	1	1974	11	42	1	3	1	6	4	1	2	2	2	2		2	1							2		1	3		2		1	1	2	1		1
方小静	A	873	2	2	1973	9	44	1	3	1	5	4	1	2	2	3	1	1	2	1							2		1	1		2		2					2
莫你	A	874	2	2	1987	12	30	1	4	3	5	4	1	3	2	3	2		2	1					1	7	2		2			2		2					2
欧国春	A	875	1		1976	12	40	1	2	1	6	4	1	2	2	2	2		2	3	18	22	20		2		2		2			2		2					2
程海燕	A	876	2	2	1976	5	41	1	2	4		4	1	2	2	2	2		2	1					2		2		2			2		2					2
程金荣	A	877	2	1	1962	9	55	1	1	2	2	4	1	2	2	3	2		2	1					1	30	2		2			2		2
姚坤贤	A	878	2	1	1952	4	66	1	1	4	6	4	2	3	2	2	2		2	1					2		2		2			2		2					2
陈伟英	A	879	2	1	1959	12	58	1	4	6	4	4	1	3	1	2	2		2	1					2		2		2			2		2
吴晓琴	A	880	2	2	1981	8	36	1	4	3	5	4	1	2	2	2	2		2	1					2		2		1	2		2		2					2
李太云	A	881	1		1972	6	35	1	2	3	4		1	2	1	3	2		2	3	25	10	20		1	10	1	1	2			2		2					2
陈琼荣	A	882	2	2	1975	6	42	1	2	2	3	4	1	2	2	2	2		2	1					2		2		1	2		2		2
陈雪娇	A	883	2	2	1991	5	26	1	3	6	5	4	1	2	2	3	1	6	2	1					2		2		1	1		1	3	2
陈琼兰	A	884	2	2	1972	10	35	1	1	4	2	4	1	2	2	3	2		2	1					1	2	2		1	1		2		2
黄海平静	A	885	2	2	1975	6	42		4	1	5	1	1	3	2	2													2			1	4	2
郑爱莲	A	886	2	1	1960	8	57		1	2		4	1	3	2	2	2		2										2					2
王磊	A	887	1		1972	9	45	1	3	1	5		1	3	2	2	2			3	20	26					2		2					1	2
何芳芸	A	888	2	2	1994	11	22	6	4	6	1	5	1	3	1	2	1	6	2	1							2		2			1	1	2					3
陈传博	A	889	1		1936	1	71	1	3	6	3	4	1	2	2	1	1	6	2	1					2		2		2			2		2
王召凤	A	890	2	1	1953	10	64	1	1	1	1	1	1	1	2	2	1	6	2	1					1	10	2		1	1		2		2					2
陈文丹	A	891	2	1	1970	5	47	1	3	3	4	4	1	3	2	3	2		2	1					2		2		1	3		2		2					2
张选	A	892	1		1981	9	36	1	2	1	3	4	1	2	2	2	2		2	1					2		2		2			2		2
林乙蕊	A	893	2	2	1982	12	34	1	2	6	4	1	1		2	3	2		1	1					1		2		2			2		2					2
王梓敬	A	894	1		1956	4	61	1	3	2	5	4	1	3	2	2	1	1	2	2					2		2		2			2		2
林乙芳	A	895	2	2	1973	9	44	1	4	1	4	4	1	3	2	2	2		2	1					2		2		2			2		2
陈春英	A	896	2	1	1968	7	49	1	3	4	3	4	1	2	2	2	2		2	1					1	15	2		2			2		2					2
袁小凤	A	897	2	1	1980	12	36	1	4	3	3	1	1	2	2	2	2		2	1					2		1	1	1	2		2		2					2
李燕霞	A	898	2	2	1996	1	21	1	3	1		1	1		2	2	2		2	1					2		2		2			2		2					2
冯崇高	A	899	1		1986	6	31	1	4	6	4		1	2	2	2	2		2	3	17	14	15		2		2		2			2		2					2
王定义	A	900	1		1964	11	52	1	2	1	4	4	1	2	2	3	2		2	3	13	20			2		2		2			2		1	2				2
颜小姬	A	901	2	2	1998	11	19	1	3	1	1	5	1							1					2		2		2			2		2					2
王琼荣	A	902	2	1	1938	5	79	1	2	3	5	4	1	2	2	2	2		2	1					2		2		2			2		2
王婷婷	A	903	2	1	1999	1	18	1	3	3	1	5	1	1	1	2	2		2	1					1		2		2			2		2
肖思浩	A	904	2	2	1970	11	47	1	4	6	4	4	1	3	2	2	2		2	1					2		2		2			2		2					2
吴树坚	A	905	1		1970	6	37	1	3	6	5	4	1	2	2	3	2			3	39	8	20				2		2			2		2
黄海花	A	906	2	2	1985	10	32	1	4	3	5	4	1		2	2	2		2	1					2		2		1	12		2		2					2
梁连喜	A	907	1		1962	12	55	1	2	2	1		1	2	2	3	2		2	1							2		2			2		2					2
陈志玩	A	908	2	2	1979	5	38	1	0	6	3	4	1	2	1	2	2		2	1					2		2		2			2		2
何怡	A	909	2	2	1989	10	28	1	4	3	5	1	1	3	1	2	2		1	1					2		1	1	2			2		2					2
韩法定	A	910	1		1989	6	28	1	4	6	5		1	2	2	3	2		2	1					2		2		2			2		2
羊学问	A	911	1		1990	1	27	6	4	3	5		1	2	2	3	2		2	1					2		2		2			2		2
韩滨定	A	912	1		1993	8	24	1	3	6	2		1	3	2	3	2		2	3	19	6	2		1	10	2		2			2		2					2
何春燕	A	913	2	1	1960	7	57	1	2	6	3	4	1	2	2	2	2		2	1					2		2		2			2		2
纪清发	A	914	1		1956	8	61	1	4	6	4		1	2	2	2	2		2	3	20	40	10		2		2		2			2		2
陈青	A	915	2	1	1958	8	59	1	4	3	1	1	1	3	2	2	2		2	1					2		1	1	1	1		2		2
韩学敏	A	916	1		1959	6	58	1	3	3	5		1	1	2	2	2		2	1					2		2		2			2		2					2
卢洁	A	917	2	2	1952	7	55	1	2	6	4	4	1	2	2	2	2		2	1					2		2		2			2		2
卢秀萍	A	918	2	1	1949	11	68	1	2	6	4	4	1	2	2	2	2		2	1							2		2			2		2					2
田风	A	919	2	2	1986	3	31	1	4	1	1	4	1	3	1	2			2	1					2		2		1	7		2		2					2
李庆英	A	921	2	1	1957	4	60	1	4	2	2	4	1	3	2	2	2		2	1					2		2		2			2		2					2
李冬梅	A	922	2	2	1968	1	39	1	2	3	4	4	1	2	2	2	2		1	1					2		2		2			2		2
洪桂玉	A	923	2	1	1963	10	54	1	0	2	2	3	1	2	2	2	2		2	1							2		2			2		2					2
吴秀飞	A	924	2	1	1948	7	69	1	2	4	3	4	1	2	1	1	1	6	2	1					2		2		2			2		2
王斌	A	925	2	2	1976	3	41	1	4	3	4	4	1	2	1	2	2		2	1					2		2		2			2		2
王大丹	A	926	1		1985	3	32	1	4	6	3	4	1	2	2	3	2		2	3	22	10	20		2		2		2			2		2					2
李淑琼	A	927	2	2	1963	8	53	1	2	1	1	4	1	3	2	1	2		2	1					2		2		2			2		2
王秀梅	A	928	2	1	1963	10	54	1	0	2	2	4	1	2	2	2	2		2	1					2		2		2			2		2
刘晓姝	A	929	2	2	1979	1	38	1	3	6	3	4	1	3	2	3	2		2	1					2		1	1	1	1	5	2		2
陈小丹	A	930	2	2	1995	5	22	1	3	5	3	5	1	3	2	3	2		2	1					2		2		1	1		2		2					2
黄骏	A	931	1		1990	10	27	1	4	6	2		1	2	1	2	2		2	1					2		1	1	2			2		2					2
王惠	A	932	2	2	1970	12	47	1	4	4	4	1	1	2	1	2	2		2	1					2		1	1	2			2		2					2
娄新芝	A	933	2	2	1966	4	52	1	2	6		4	1	2	2	3	2		1	1					2		2		2			2		1	1	5	半
吴奕颖	A	934	2	2	1992	7	25	1	4	4	3	5	1	2	2	2			2	2					2		2		1	2		2		2					2
吴若辉	A	935	1		1964	4	53	6	4	6	5		1	2	1	2	2		2	1					1		2		2			2		2					2
卓如枚	A	936	2	2	1966	12	50	6	2	6	2	4	1	2	2	1	2		2	1					1	10	2		2			2		2					2
余运财	A	937	1		1966	9	51	1	2	1	1	4	1	2	2	2	2		2	2	20	20	1		1	20	2		2			2		2					2
杨泽皇	A	938	1		1980	1	38	1	3	2	4		1	2	2	2	2		2	1					2		2		2			2		2
吴涛	A	939	1		1972	11	45	1	3	6	4		1	3	2	2	2		2	2					2		2		2			2		2
王批	A	940	1		1988	5	29	1	2	2	4		1	2	2	3	2		2	1					2		2		2			2		2					2
胡旭荣	A	941	1		1972	8	45	1	3	2	6	4	1	2	2	2	2		2	3					1		2		2			1	3	2
何书兰	A	942	2	1	1968	10	42	1	3	6	1	4	1	2	2	2	2		1	1					2	25	1	1	1	6		2		2
杨海仙	A	943	2		1964	11	52	1	3	1	4	4	1	2	1	2	2		2	1					1	3	1	1	2			1	5	2
余婷婷	A	944	2	2	1992	4	25	1	4	3	4	5	1	3	2	2	2		2	1					2		1	3	2			2		2
苏梅新	A	945	2	2	1980	8	38	1	2	6	4	4	1	2	2	2	2		2	1					2		2		2			2		2
王旭	A	946	2	2	1981	9	36	6	4	6	6	4	1	2	2	2			1	1					2		2		2			2		2
张淑芹	A	947	2	1	1957	4	60	6	2	3	4	1	1	2	2	3	2		1	1					2		2		2			2		2
王守山	A	948	1		1956	10	61	1	0	6	6	4	1	3	2	3	2		2	1					1	20	2		2			2		2					2
许颖颖	A	949	2	2	1979	2	38	1	3	3	4	4	1	3	2	2	2		2	1					2		2		2			2		2
郭健春	A	950	2	2	1966	3	51	1	2	2	3	4	1	3	2	2	2		2	1					2		2		2			2		2
郭春艳	A	951	2	1	1971	6	46	1	2	6	3	4	1	2	2	2	2		2	1					2		2		2			2		1	3	2			2
郭春茹	A	952	2	2	1976	11	40	1	2	6	3	4	1	3	2	2	2		2	1					2		2		2			2		2
潘啟云	A	953	2	1	1949	9	68	6	3	6	3	4	1	3	2	3	2		2	1					1	2	1	7	1	2		1		2	3	2	20
袁桂梅	A	954	2	1	1960	11	57	1	2	1	2	4	1	2	1	2	2		2	1					1		2		2			2		2					2
林琦	A	955	2	1	1964	6	53	1	2	3	3	4	1	3	2	2	2		2	1					2		2		2			2		2
苏海英	A	956	2	1	1955	9	62	1	2	6	2	4	1	2	2	2	2		2	1					2		2		2			2		2
陈英艳	A	957	2	2	1969	5	48	1	4	6	6	4	1	3	2	2	2		1	1					2		2		2			2		2					2
符英兰	A	958	2	1	1951	1	66	1	3	6	5	2	1	2	2	2	2		2	1					1	30	2		1	1		2		2
符史光	A	959	1		1948	5	70	1	2	6	4		2	3	2	3	2		2	1					2		2		2			2		1	2		15	12
钟时飞	A	960	1		1962	3	55	6	2	2	4	4	1	3	2	2	2		2	1					1	20	1	1	2			2		2					2
李祝娟	A	961	2	1	1963	5	54	6	2	2	3	4	1	2	2	2	2		2	1					2		1	1	2			2		2					2
陈小红	A	962	2	1	1965	10	52	1	2	2	3	4	1	2	2	2	2		2	1					1	6	2		2			2		2
曹必俊	A	963	1		1964	9	53	1	2	6	3	4	1	3	2	2	2		2	3	13	40	20		1	40	2		2			2		2					2
周雅宾	A	964	2	2	1986	6	31	1	4	3	4	5	1	2	1	2	2		2	1					1	10	1	1	2			1	3	2					2
黄月秀	A	965	2	1	1962	7	55	1	2	1	6	4	1	1	2	2	2		2	1					2		2		2			2		2
陈佳泽	A	966	1		1960	5	57	1	2	2	3	4	1	3	2	3	2		2	1					1	5	2		2			2		2
林丽华	A	967	2	2	1972	11	45	6	2	4	5	4	1	2	2	1	2		2	1					1	20	2		2			2		2
张勇	A	968	1		1974	12	43	1	4	6	3		1	2	2	2	2		2	3	33		10		1	10	2		2			2		2
李秋琼	A	969	2	2	1968	4	49	1	3	6	4	5	1	3	2	2	2		2	1					1		1	1	2			1	4	2					2
杨会琼	A	970	2	2	1952	4	65	1	2	3	4	4	1	3	2	2	2		2	1					2		2		2			2		2
杨长青	A	971	1		1951	1	67	1	2	6	2	4	1	1	2	2	2		2	1					1		2		2			2		2					3
熊桂荣	A	972	1		1958	11	58	1	3	3	3		1	1	2	3	2		2	3	13	45	20		1	45	2		2			2		2					2
陈引珍	A	973	2	1	1963	7	54	1	3	3	3	4	1	1	2	3	2		2	1					1	30	2		2			2		2					2
梁桂琼	A	974	2	1	1966	5	51	1	2	6	2	4	1	2	2	3	2		2	1					1	10	2		1	4		2		2					2
陈志连	A	975	2	2	1953	10	63	1	3	6	2	4	1	2	2	2	2		2	1					2		2		2			2		2					2
庞海英	A	976	2	1	1966	10	51	1	3	4	5	4	1	1	2	2	2		1	1							1	3	2			1	4	1	1	2			1
郑惠英	A	977	2	1	1962	1	55	1	4	6	4	4	1	1	2	2	2		2	1					2		2		2			1	4	2					2
秦不专	A	978	2	2	1967	4	48	1	1	1	3	4	1	3	2	3	2		2	1					2		2		1	1		2		2					2
陈华	A	979	1		1967	6	50	1	1	2	2		1	2	2	2	2		2	3	25				1	5	2		2			2		2
李海	A	980	1		1965	6	50	1	2	4	3		1	2	1	3	2		2	1					2		2		2			2		2					2
陈若芬	A	981	2	1	1937	6	80	1	3	1	5	4	1	3	2	2	2		2	1					1	10	2		2			2		2
陈敏	A	982	2	2	1977	8	41	1	4	4	5	4	1	3	2	2	2		2	1					1	18	1	7	1	6		1	3	2
吴地妹	A	983	2	2	1965	10	52	1	1	2	4	4	1	3	2	2	2		2	1					2		1	7	2			1		2
吴地连	A	984	2	2	1969	2	48	1	2	3	4	4	1	3	2	2	2		2	1					2		2		1	12		2		2
岑爱梅	A	985	2	2	1953	9	65	1	1	2	4	1	1	3	2	2	2		2	1					2		2		2			2		2					2
陈莉	A	986	2	2	1979	7	40	1	4	3	4	4	1	2	2	2	2		2	1					1		1	3	1	6		1	3	2
曾德忠	A	987	1		1964	1	53	1	2	1	2	2	1	2	1	2	2		2	1					2		2		2			2		1	3	2		1	1
吴英梅	A	988	2	2	1967	7	50	1	2	1	4	4	1	3	2	2	2		2	1					1	3	2		2			2		2
肖赛梅	A	989	2	1	1955	7	63	1	1	2	1	4	1	2	2	2	2		2	1					2		2		2			2		2					2
陈张贵	A	990	2	1	1956	7	62	1	2	2	4	4	1	3	2	3	2		2	1					1	5	2		2			2		2					2
胡春生	A	991	1		1966	1	52	1	2	6	3		1	3	2	2	2		2	3	32	20	30		1		2		2			2		2
曾宽阳	A	992	1		1958	12	59	1	4	6	5	4	1	2	1	2	2		2	1					2		2		2			2		1	1	2	5	12	2
许玉珠	A	993	2	1	1956	9	61	1	3	6	5	4	1	2	1	2	1	6	2	1					2		2		1	3		2		2
莫壮娟	A	994	2	2	1972	5	45	1	3	6	3	4	1	3	2	2	2		2	1					1	20	2		2			2		2
孙富先	A	995	2	1	1946	10	71	1	1	6	3	4	1	3	1	2	2		2	1					1	20	2		2			2		2
谢秋星	A	996	2	2	1990	5	27	1	3	3	4	5	1	3	2	2	2		2	1					2		2		2			2		2
杨艳辉	A	997	1		1987	3	30	6	4	1	6		1	2	2	2	2		2	1					2		2		2			2		2
吴佳蕾	A	998	2	2	1969	8	48	1	3	3	6	4	1	2	2	2	1	1	2	1							2		1	2		2		2					2
吴钟台	A	999	1		1964	10	53	1	4	3	5		1	2	2	2	2		2	1					2		2		1	2		2		2					2
邓金玲	A	1000	2	2	1981	10	36	1	2	1	3	4	1	3	2	2	2		2	1					2		2		2			2		2					2
梁荣芳	A	1001	2	1	1967	6	50	1	2	6	3									1					2		2		1	6		2		2
文永梅	A	1002	2		1975	5	42	1	2	3	4	4	1	3	2	3	2		2	1					2		2		2			2		2					2
马代刚	A	1003	1		1954	4	63	1	4	3	5	4	1	2	1	2	2		2	1					1	30	1	16	1	1		2		2					2
高云	A	1004	2		1966	4	51	1	2	6	4	4	1	3	2	1	2		2	1					1		2		2			2		2
吴雪茹	A	1005	2	2	1963	1	54	1	3	6	6	4	1	2	2	2	2		2	1							2		2			2		1	2				2
林家云	A	1006	1		1960	10	57	1	3	3	4	4	1	1	2	2	2		2	1							2		2			2		2					2
刘秀英	A	1007	2	1	1950	10	67	1	0	2	1	4	1	1	2	3	2		2	1					2		2		2			2		2
谢秉松	A	1008	1		1976	10	41	1	3	6	6	4	1	2	1	2	2		2	1	20	20	3		1	10	2		2	2		2		2					2
王海清	A	1009	2	2	1974	3	43	1	3	6	3	4	1	3	1	2	2		2	1					2		2		1	4		1	3	2
许少霞	A	1010	2	1	1972	3	45	1	2	3	3	4	1	1	2	2	2		2	1					2		2		2			2		2					2
欧阳红辉	A	1011	2	2	1978	4	38	1	3	1	3	4	1	3	1	2	2		2	1					1	10	2		2			2		2
汪贵玉	A	1012	2	2	1978	12	38	1	2	3	3	1	1	2	1	2	2		2	1					1	10	2		2			2		2					2
陈英容	A	1013	2	2	1976	8	41	1	2	3	3	4	1	2	2	2	2		2	1					2		1	1	2			2		2					2
程春梅	A	1014	2	2	1972	11	45	1	2	1	3	4	1	1	1	2	2		2	1					1	20	2		2			2		2					2
吴海英	A	1015	2	2	1976	6	41	1	2	3	3	1	1	2	2	2	2		2	1					2		2		2			2		2
林少芳	A	1016	2	2	1971	5	46	1	2	1	4	4	1	2	2	2	2		2	1					1	10	2		2			2		2
陈亚弟	A	1017	1		1970	10	47	1	1	6	3		1	1	2	3	2		2	3	13	34	20		1	34	2		2			1	35	1	1	2	4	2	1	1			1
王翠珍	A	1018	2		1969	5	48	1	3	4	4	4	1	3	2	2	2		1	1							2		2			2		2					2
符植铝	A	1019	1		1990	1	27	1	4	3	4		1	3	2	2	2		2	1					2		2		2			2		2					2
韩雪娟	A	1020	2	1	1985	1	32	1	4	6	6	1	1	3	2	3	2		2	1					2		2		2			2		2
罗雪松	A	1021	1		1985	7	32	1	4	3	5		1	3	2	2	2		2	1					2		2		2			2		2					2
王玉南	A	1022	2	1	1964	6	55	1	1	2	2	4	1	2	2	3	2		1	1					2		2		2			2		2					2
王亚南	A	1023	2	1	1970	3	47	1	2	6	5	4	1	1	2	3	2		2	1					1	18	2	3	2			1	5	2
陈晓文	A	1024	1		1975	3	42	1	4	3	6	4	1	2	2	2	2		2	1					2		2		2			2		2
王秋花	A	1025	2	2	1949	9	68	1	2	6	3	4	1	2	2	2	2		2	1					2		2		2			2		2					2
吴丽娟	A	1026	2	2	1979	7	38	1	3	3	4		1	2	2	3	2		1	1					2		2		2			2		1	3	3
符淑美	A	1027	2	2	1976	4	41	1	4	6	5	4	1	2	2	2	2		2	1					1	11	1	1	2			2		2
符素贞	A	1028	2		1980	3	37	1	4	6	5	4	1	3	2	2	2		2	2					2		2		2			2		2
冯小雪	A	1029	2	2	1970	11	47	1	2	1	2	4	1	1	2	2	2		2	1					2		2		1	2		2		2					2
叶德群	A	1030	1		1953	10	64	1	2	6	4		2	3	2	2	2		1	1					2		2		2			2		2
卓崇慧	A	1031	2	2	1974	10	43	1	3	6	3	4	1	3	1	2	2		2	1					2		1	1	2			1	3	2
卓赛兰	A	1032	2	1	1967	3	50	1	3	6	6	4	1	2	2	2	2		2	1					2		1	1	1	4		1	35	2
卓崇英	A	1033	2	2	1969	6	48	1	2	3	3	1	1	2	2	2	2		1	1					1	2	1	1	2			1	35	2
赵世泽	A	1034	1		1964	11	53	1	4	3	5		1	3	2	2	2		2	1					2		2		2			2		2
莫礼清	A	1036	1		1971	10	46	1	2	6	3	4	1	3	2	1	2		2	3	18	27	50		1		2		2			2		2
赵彦	A	1037	1		1964	10	53	1	3	3	4	4	1	3	1	2	2		2	1					1	25	2		2			2		2
文永珍	A	1038	2		1974	6	43	1	2	2	4	4	1	3	1	2	2		2	1					2		2		2			2		2
苏爱娟	A	1039	2	1	1950	6	67	1	1	6	4	4	1	2	2	2	2		2	1					1	43	2		2			1	5	2					2
张燕	A	1040	2	2	1979	7	38	1	4	3	4	4	1	2	1	2	2		2	1					2		1	134	1	1		2		2					2
姚月荣	A	1041	2	1	1950	8	67	1	1	2	4	4	1	2	2	2	2		2	1					2		2		2			2		2
姚月转	A	1042	2	1	1954	1	63	1	1	3	4	4	1	2	2	3	2		1	1					2		2		2			1	5	2
张志龙	A	1043	1		1948	8	69	1	3	6	5		1	3	1	1	2		2	1					2		2		2			2		2					2
王海霞	A	1044	2	2	1969	5	48	1	2	1	3	4	1	3	2	2	2		2	1					1	10	2		1	6		2		2
徐训成	A	1045	1		1965	10	52	1	4	3	5	4	1	1	2	2	2		2	3	16	30	45		2		2		2			1	4	1	1	2		12	1
黄礼新	A	1046	1		1964	4	53	1	3	6	5	4	1	1	2	3	2		2	1	19	30	20		1	20	2		2			2		1	1	2	2		2
陈英容	A	1047	2	1	1969	11	48	1	2	2	4	4	1	1	2	2	2		2	1					2		2		2			2		2
吉梅	A	1048	2		1966	11	51	1	1	6	5	4	1	2	2	3	2		2	1							1	1	1	3		2		2					2
曾玉金	A	1049	2	1	1940	6	77	1	1	2	4	4	1	2	2	2	2		2	1					2		2		2			2		2
陈润	A	1050	2	1	1971	2	46	1	2	3	4	1	1	2	1	2	2		1	1					2		2		2			2		2					2
谢卓永	A	1051	1		1948	12	69	1	4	6	4	4	1	2	2	3	2		2	3	45	24	10		2		2		2			2		2					2
王宏荣	A	1052	1		1966	5	51	1	2	6	3		1	2	2	2	2		2	1					2		2		2			2		2
陈桂丽	A	1053	2	2	1976	12	46	1	4	6	4	4	1	3	2	2	2		2	1					2		2		2			2		2
王尊章	A	1054	1		1950	6	68	1	1	2	3		1	2	2	3	2		2	3	38	30	20		2		2		1	1		2		2					2
王莲容	A	1055	2	1	1955	10	65	1	0	6	1	4	1	3	2	2	2		2	1					1	20	2		2			2		2
陈集安	A	1056	1		1962	9	56	1	2	2	1		1	3	2	3	2		2	3	20	36	20				1	1	2			2		1	3
郭春林	A	1057	1		1965	4	52	1	4	3	4		1	2	2	2	2		2	1					2		1	7	2			1	3	2
李晖	A	1058	1		1967	10	49	1	3	6	5	4	1	2	2	2	2		2	1					2		1	1	2			1	5	2
宋绍军	A	1059	1		1961	9	57	1	3	1	3		1	3	2	2	2		2	1					2		2		2			2		2
郑丽凤	A	1060	2	1	1960	2	57	1	1	2	3	4	1	3	1	1	2		2	1					1	20	2		2			2		2
郑潮葵	A	1061	1		1955	1	62	1	3	6	3		1	3	2	2	2		2	3	32	30	10		2		2		2			2		2
陈兴凤	A	1062	2	2	1985	4	32	1	4	4	2	4	1	1	2	3	2		2	1					2		2		2			2		2
吴纪盛	A	1063	1		1986	9	30	1	4	2	2		1	2	2	3	2		2	1					2		2		2			2		2					2
冯桂玉	A	1064	2	1	1962	10	55	1	1	4	1	4	1	2	2	3	2		2	1					2		2		2			2		2					3
吴坤儒	A	1065	1		1953	12	63	1	3	4	1		1	2	2	3	2		2	2					2		2		2			2		2
王梅英	A	1066	2		1976	4	41	1	2	3	6	4	1	2	2	2	2		2	1							2		2			2		2					2
蔡仕开	A	1067	1		1973	4	44	1	2	2	2	4	1	2	2	2	2		2	3	18	20			1		2		2			2		2					2
韦保玉	A	1068	2	2	1989	3	28	1	4	3	6	4	1	2	2	2	1	1	2	1							1	1	1	1		2		2					2
毛爱玲	A	1069	2	1	1970	1	47	1	3	3	3	1	1	3	2	2	2		2	1					1	20	2		2			2		2
王电日	A	1070	1		1976	9	41	1	4	6	4		1	2	2	3	2		2	1					2		2		1	7	5	1	1	1	3
郑妍	A	1071	2	2	1983	12	34	1	4	6	3	4	1	2	2	3	2		1	1					1	13	2		2			1	3	1	3	3			2
陈志英	A	1072	2	1	1962	7	55	1	3	3	3	4	1	3	2	3	2		2	1					2		2		2			2		2					1
唐国宪	A	1073	1		1949	11	68	1	3	6	5	4	1	3	2	2	2		2	1							2		2			2		2
苏小霞	A	1074	2	1	1955	4	62	1	3	6	5	4	1	3	2	2	2		2	1					2		2		2			2		2					2
郑忠东	A	1075	1		1947	7	70	1	4	6	5	4	1	2	2	2	2		2	1					2		2		2			2		1	1	2	10	15	2
方丽凤	A	1076	2	1	1949	11	67	1	4	6	5	4	1	2	2	2	2		2	1					1		2		2			2		2					2
甘月霞	A	1077	2	2	1956	2	59	1	3	4	3	4	1	3	2	2	2		2	1					2		2		2			2		2					2
黄良彪	A	1078	1		1952	7	65	1	3	3	4	4	1	3	2	2	2		2	1					2		2		2			2		2
郭运雄	A	1079	1		1960	12	55	1	3	1	2		1	3	2	2	2		2	1					2		2		2			2		2					2
蒙秋香	A	1080	2	1	1961	9	56	1	3	6	3	1	1	3	2	2	2		2	1					2		2		2			2		2					2
廖小玲	A	1081	2	1	1966	9	51	1	3	1	4	4	1	2	2	2	2		2	1					1	10	2		2			1	6	2
林树蓓	A	1082	2	2	1986	4	31	1	4		2		1	2	1	2			2	1					2		2		2			2		2
韦吉腾	A	1083	1		1987	8	30	1	3	1	4		1	2	2	2	2		2	3	25	6	20		2		2		2			2		2						1
谢毓红	A	1084	1		1972	1	45	1	3	6	5		1	1	2	3	2		2	1					1	10	2		2			2		2					2
吴荣胜	A	1085	1		1972	11	45	1	2	2	3		1	1	2	2	2		2	3	16	29	30		2		2		2			2		2
蒋翠华	A	1086	2	1	1964	6	53	1	2	2	3	4	1	3	2	2	2		2	1					1	30	1	1	2			1	5	2					2
谢琼英	A	1087	2	2	1968	8	49	1	3	1	2	4	1	1	2	2	2		2	1					1	25	2		2			2		2
郑冬霞	A	1088	2	2	1963	11	54	1	1	6	2	4	1	2	2	2	2		2	1					2		2		2			2		2					3
郑维汉	A	1089	1		1962	1	55	1	3	2	2	4	1	2	2	2	2		2	1					1	20	2		1	1		2		2					2
王关兴	A	1090	1		1962	9	55	1	3	6	3		1	3	2	2	2		2	1					2		1	6	2			1	3	2
林书健	A	1091	1		1963	1	54	1	3	6	4		1	3	2	2	2		2	1					2		2		2			2		2					2
林花	A	1092	2	2	1966	7	52	1	2	1	3	4	1	3	2	3	2		2	1					2		2		2			2		2					2
符继红	A	1093	2	1	1952	3	66	1	2	1	1	4	1		2	2	2		2	1					2		2		2			2		2						1
符蝶	A	1094	2	2	1969	3	49	1	3	2	4	1	1	2	2	2	2		2	1					1	15	2		1	6		2		2					2
龙玉珠	A	1095	2	1	1969	10	48	1	2	1	4	1	1	3	2	2	2		2	1					2		2		2			2		2					2
陈文恋	A	1096	2	2	1988	7	29	1	4	3	4	4	1	3	2	2	2		2	1					2		2		2			2		1	3	3
陈加冠	A	1097	1		1954	12	63	1	3	6	3		1	3	2	2	2		2	1					1		2		2			1	3	2
韩淑	A	1098	2	2	1989	2	28	1	4	3	2	4	1	3	2	2	2		1	1					1	10	1	3	2			1	3	2					2
郑妹	A	1099	2	1	1964	10	53	1	2	4	2	4	1	2	2	3	2		1	1					1	20	2		2			2		2					2
王儒英	A	1100	2	2	1950	5	67	1	1	6	3	4	1	3	2	2	2		2	2					1	10	2		2			2		2
冼宏梅	A	1101	2	1	1978	12	39	1	4	3	3	4	1	2	2	2	2		2	1					2		1	2	1	2		1	1	2
邓小霞	A	1102	2	2	1978	9	38	1	2	6	4	4	1	1	2	2	2		1	2					1		2		2			2		2
陈雪	A	1103	2	1	1954	6	63	1	3	3	3	1	1	2	2	2	2		2	1					2		2		2			2		2					2
卢艳梅	A	1104	2	1	1965	1	52	1	3	6	3	4	1	3	2	2	2		2	1					1		2		2			2		2
郑雄	A	1105	1		1963	6	54	1	3	6	5		1	3	2	2	2		2	3	20	27	10		2		2		2			2		2					2
刘霞芳	A	1106	2	1	1961	5	56	1	4	3	5	1	2	3	2	2	2		2	1					2		2		2			2		2					2
吴卓锦	A	1107	1		1994	8	23	1	4	3	4		1	3	1	1	2		2	3	22	半	15		2	1	1	1	2			2		2					2
苏辉	A	1108	1		1980	9	38	1	3	6	1	4	1	1	2	2	2		2	3	22		40				2		2			2		2					2
苏妹	A	1109	2	1	1953	5	64	1	3	4	2		2		2	3	2		2	1					1	40	2		2			2		2					2
王丽	A	1110	2	2	1977	2	41	1	2	1	4	4	1	3	2	2	2		2	1					2		1	7	2			2		2
苏海娘	A	1111	2	2	1975	9	42	1	0	3	3	4	1	2	2	3	2		2	1					2		2		2			2		2					2
廖琼玉	A	1112	2	1	1963	7	54	1	1	1	1	4	1	2	2	3	2		2	1					2		2		2			2		1	1	2	1	12	3
曹家德	A	1113	1		1963	4	54	1	1	3	3		1	3	2	3	2		2	3		30	10		1	5	2		2			2		2
宋叶龙	A	1114	1		1988	8	29	1	3	1	6		1	3	2	3	2		2	1					2		2		1	7		2		2					2
王乐琼	A	1115	1		1961	4	56	6	2	6	4	4	1	2	2	2	2		2	1					2		2		2			2		2					2
莫耀林	A	1116	1		1968	5	49	5	1	1	4		1	3	2	3	2		2	3	47	2	8		2		2		2			2		2
苏淋萍	A	1117	2	2	1975	6	42	1	2	1	5	4	1	2	2	2	2		2	1					1	12	1	6	2			2		2
许书盛	A	1118	1		1972	9	45	1	1	6	2	4	1	2	2	3	2		2	3	28	17	20				2		2			2		2					2
周先雄	A	1119	1		1961	10	56	1	3	2	2	4	1	2	2	2	2		2	1					2		2		2			2		2					2
周琼玉	A	1120	2	2	1962	4	55	1	1	6	4	4	1	3	2	2	2		2	1					2		2		1	1		2		2					2
周丽荣	A	1121	2	2	1973	8	45	1	1	6	3	4	1	1	2	3			2	1					1		2		1	1		2		2					2
陈张光	A	1122	1		1967	3	50	1	1	1	3		1	3	2	3	2		2	2					2		2		2			2		2
蔡夫婕	A	1123	1		1972	2	45	1	3	1	6		1	2	2	2	2		2	3	17	28			2		1	1	2			2		2
欧初军	A	1124	1		1952	6	65	1	2	1	6	4	1	2	2	2	2		2	1					1	40	2		2			2		2					2									1
陈家媛	A	1125	2	2	1982	12	36	2	3	3	4	4	1	3	2	3	2		2	1					2		2		1	2		2		2
周经兰	A	1126	2	2	1980	2	37	1	1	6	3	4	1	2	2	3	2		2	1					2		1	1	1	4		2		2					2
梁玉美	A	1127	2	2	1970	3	38	1	2	3	5	1	1	3	1	2	2		2	1					2		2		2			2		1	3	3
陈若飞	A	1128	2	2	1977	6	40	1	3	1	3	4	1	3	2	2	2		2	1					2		2		2			2		2
英慧	A	1129	2	1	1972	8	45	1	2	4	4	4	1	2	1	2	2		2	2					2		2		2			2		2
陈麟鹏	A	1130	1		1972	10	45	1	3	1	3		1	2	2	2	2		2	3	22	23	15		1	20	2		2			2		2					2
申康乐	A	1131	1		1963	2	55	1	3	3	3	4	1	3	2	2	2		2	3	20		10				2		2			2		2					2
吴桂兰	A	1132	2	1	1955	7	62	1	3	4	4	4	1	2	2	3	2		2	1					2		2		2			1	4	2					2
吴清康	A	1133	1		1999	4	18	1	3	5	3		1	2	1	2	2		2	1					1		2		2			2		2
吴学勤	A	1134	1		1970	12	46	1	2	2	3		1	2	2	2	2		2	3					2		2		2			2		2
吴纯武	A	1135	1		1963	2	55	1	3	1	5		1	3	2	3	2		2	1					1	30	2		2			2		2					2
唐根发	A	1136	1		1957	1	60	1	4	6	6		1	2	2	2	2		2	3	25	35			2		2		2			2		2
吴清洁	A	1137	1		1989	1	28	1	3	6	4		1	2	2	2	2		2	3	20	7	10		1	6	2		2			1	3	2					3
欧诒湘	A	1138	1		1971	11	45	1	4	1	4		1	3	1	2	2		2	3	22	23	15		1	18	1	1	2			2		2					2
李彩芸	A	1139	2	1	1963	8	54	1	2	6	5	4	1	2	2	2	2		1	1					2		2		2			2		2
陈明勇	A	1140	1		1969	2	48	1	4	3	5	4	1	2	2	2	2		2	1					2		2		2			1	4	1	1	2	1	1	2
陈泽梅	A	1141	2	1	1967	7	49	1	3	3	4	1	1	2	2	2	2		2	1					1	20	2		2			2		2
吴海平	A	1142	2	1	1963	10	54	1	4	3	5	1	1	3	2	2	2		2	2					2		2		2			2		1	3	2		1
曾娟	A	1143	2	1	1965	5	53	1	3	1	4	4	1	2	2	3	2		2	1					2		2		2			2		2					2
吴珠明	A	1144	2	1	1964	10	53	1	3	1	5	4	1	2	2	2	2		2	1					1	4	2		2			2		2
许吉海	A	1145	1		1961	7	56	1	3	6	5		1	2	2	2	2		2	1					1	5	2		2			2		2
王香梅	A	1146	2	1	1964	1	53	1	1	6	3	4	1	3	2	3	2		2	1					1	5	2		2			2		2
吴华建	A	1147	1		1970	6	48	1	2	2	4		1	2	2	2	2		2	3	18	30	20		2		2		2			2		2
王兰风	A	1148	2	1	1964	4	53	1	2	6	3	4	1	3	2	3	2		2	1					2		2		2			2		2
何瑞松	A	1149	1		1969	10	48	1	4	1	5		1	2	2	2	2		2	1					2		2		2			2		2
李仕波	A	1150	1		1954	9	63	1	2	6	2		1	3	2	3	2		2	2	20	43	21		1	15	2		1	1		2		2
李月兰	A	1151	2	1	1955	3	63	1	3	2	5	4	1	2	2	2	2		2	1					2		2		2			2		2
梁彩霞	A	1152	2	2	1976	10	41	1	4	3	4	4	1	3	1	2	2		2	2					2		2		1	1		2		2
尹秀玲	A	1153	2	1	1961	9	66	1	3	6	4	4	1	2	1	2	2		2	1					1	20	2		2			1	5	2					2
寇颖明	A	1154	1		1958	12	59	1	4	3	4	4	1	2	2	2	2		2	1					2		2		2			2		2					2
何会雄	A	1155	1		1970	11	47	1	3	6	3	4	1	3	2	2	2		2	3	27	20	10		2		2		2			1	3	1	2
吴照菊	A	1156	2	1	1972	10	48	1	1	4	3	4	1	3	2	2	2		2	1					2		2		2			2		2					2
陈薇	A	1157	2	2	1981	12	34	1	2	6	3	4	1	3	2	2	2		2	1					2		2		2			2		2					2
陈文容	A	1158	2	2	1974	2	43	1	3	3	5	4	1	2	2	3	2		2	1					2		1	1	2			2		2					2
吴忠	A	1159	1		1968	10	49	1	4	3	4		1	2	1	2	2		2	1					2		2		2			2		2
龙云全	A	1160	1		1970	3	47	4	3	1	4		1	2	2	2	2		2	1	25	20	10		2		2		2			2		1	2	3			2
王继岸	A	1161	1		1982	6	35	1	3	6	4		1	2	2	2	2		2	3	16	19	10		2		2		2			2		2					2
蔡宗玲	A	1162	2	1	1958	9	59	1	3	1	3	4	1	2	2	2	2		2	1					2		2		2			1	3	2								1
林贤	A	1163	1		1967	8	50	1	4	6	6		1	2	2	2	2		1	1					2		2		2			2		2					2
劳琬雅	A	1164	2	2	1990	10	27	1	4	3	3	4	1	3	2	2	2		2	1					2		2		2			2		2					3
王秀梅	A	1165	2	1	1959	10	60	1	3	3	5	4	1	1	2	3	2		1	1					2		2		2			2		2
陶俊俏	A	1166	2	2	1983	12	34	1	2	4	3	4	1	2	2	2	2		1	1					2		2		2			2		2
何景文	A	1167	1		1979	12	38	1	3	6	4		1	2	1	2	2		2	1					2		2		2			2		2
王波	A	1168	1		1954	5	63	1	4	6	6		1	1	2	2	2		2	1					1	20	2		2			2		2					2
王玉娟	A	1169	2	1	1956	8	61	1	0	2	3	4	1	2	2	3	2		2	1					1	5	2		2			2		2					2
颜渊川	A	1170	1		1985	2	32	1	4	3	5	4	1	2	2	2	2		2	1					2		2		2			2		2
韩海轮	A	1171	2	2	1970	6	47	1	4	3	6	4	1	2	2	2	2		2	1					2		2		1	4		1	3	2
符日芳	A	1172	1		1986	7	31	1	4	6	5	4	1	3	2	3	2		2	1					2		1	1	2			2		2					2
苏志强	A	1173	1		1973	10	44	1	2	6	4	4	1	2	2	2	2		2	1	41	2	20		2		2		2			2		1	3	5	1		3
乔碧清	A	1174	2	2	1977	9	40	1	4	6	3	4	1	3	2	2	2		2	2					2		2		2			2		2					2
陈吉利	A	1175	2	2	1972	1	45	1	2	3	3	1	1	3	1	2	2		2	1					1		2		2			2		2					2
陈淑江	A	1176	2	2	1975	2	45	1	2	1	3	4	1	3	2	2	2		2	1					2		2		2			2		2					2
吴清仁	A	1177	2	1	1957	9	62	1	3	6	3		1	3	2	2	2		2	3	17	45			2		2		2			2		2
吴金花	A	1178	2	1	1962	1	55	1	3	6	4	4	1	2	2	2	2		2	1					2		2		2			2		2					2
杨惠霞	A	1180	2	2	1966	11	51	1	1	4	4	4	1	3	2	2	2		2	1					2		2		2			2		2					2
余小玲	A	1181	2	2	1989	9	28	1	2	2	6	4	1	3	2	2	2		2	1					2		2		2			2		2					2
黄录迈	A	1182	2	1	1953	9	64	1	1	4	1	4	1	1	2	3	2		2	1					2		2		2			2		2					2
陈亚民	A	1183	1		1952	3	65	1	1	2	1		1	1	2	3	2		2	3	16	65	20		1	40	2		2			2		2
蔡建标	A	1184	1		1968	9	49	1	4	3	5		1	3	2	3	2		2	3	19	30	20		2		2		2			2		2
吴花	A	1185	2	2	1989	2	28	1	4	6	5	5	1	3	2	1	2		2	1					2		2		2			1	3	2					2
陈来珠	A	1186	2	2	1987	10	30	1	2	6	3	4	1	2	2	2	2		2	1					2		1	3	2			2		2
王碧芹	A	1189	2	2	1990	3	27	1	2	6	4	5	1	1	2	2	2		2	1					2		2		2			2		2
陈川岛	A	1190	1		1945	7	72	1	3	6	2	4	1	1	2	3	2		2	1					2		1	1	2			2		1	3	2		156	1								1
王妚兰	A	1191	2	1	1958	8	69	1	3	6	4	3	2	3	1	2	2		2	1					2		2		2			2		2					2
吴发谦	A	1192	1		1956	9	61	1	2	2	1		1	1	2	2	2		2	3	22	18	10		2		2		2			2		2					2
邝娃娃	A	1193	2	1	1960	9	57	1	0	2	3	4	1	2	2	2	2		2	1					2		2		2			2		2					2
张利连	A	1194	2	1	1957	6	60	1	0	2	3	4	1	3	2	2	2		2	1					1		2		2			2		2					2
符晓玲	A	1195	2	2	1966	10	51	1	4	3	5	4	1	3	2	2	2		2	1					2		2		2			2		2					2
唐孔花	A	1196	2	2	1989	11	28	1	4	3	5	5	1	3	2	3	2		2	1					1	3	2		2			2		2					2
梁艳	A	1197	2	2	1986	10	31	1	3	4	3	4	1	2	2	2	2		2	1					1	8	2		2			2		2
蔡东青	A	1198	2	2	1985	6	32	1	2	6	3	4	1	1	1	3	2		2	1					2		2		2			2		2					2
符月连	A	1199	2	1	1968	8	59	1	2	6	2	4	1	3	2	2	2		2	1					2		2		2			2		2					2
符丽霞	A	1200	2	2	1965	7	52	1	4	6	5	4	1	3	2	2	2		2	1					2		2		2			2		2					2
吴国萍	A	1201	2	2	1986	11	31	1	2	4	3	1	1	1	2	2	2		2	1					1	5	2		1	34		2		2
吴志东	A	1202	1		1962	6	55	1	3	6	3		1	2	2	3	2		2	2					2		1	3	2			2		2
赖越秀	A	1203	2	1	1965	4	53	1	2	1	3	4	1	2	2	3	2		2	1					2		2		2			2		2
陈文澜	A	1204	2	2	1966	12	51	1	4	6	4	4	1	3	2	3	2		2	2					2		2		1	1		2		2					2
王大明	A	1205	1		1965	8	52	1	2	1	4		1	3	2	3	2		2	1					2		2		2			2		2
凌家宝	A	1207	1		1974	9	43	1	4	3	5	4	1	2	2	2	2		2	1					2		2		2			2		2					2
王真清	A	1208	1		1989	6	28	1	4	3	1		1	2	2	2	2		2	2	25				1	25	2		1	4		2		2					3
陈英仕	A	1209	1		1954	7	63	1	3	4	3		1	2	2	2	2		2	3	30	33	28		2		2		2			2		2													1
王春香	A	1210	2	2	1956	5	63	1	4	4	4	1	1	2	2	2	2		2	1					1		1	1	1	12	5	2		2					2
王珂	A	1211	2	2	1981	9	36	1	4	6	6	5	1	3	2	3	2		2	1					1	20	2		2			2		2
赵会身	A	1212	1		1976	11	42	1	3	2	4		1	2	2	2	2		2	3	20	22	20		2		1	1	2			2		2
林芳燕	A	1213	2	1	1964	5	53	1	2	3	4	4	1	2	2	2	2		2	1					1	2	2		2			2		2
姜弘	A	1214	2	1	1964	5	53	1	3	1	4	4	1	2	2	2	2		2	1					1	30	2		2			2		2
镇祥凤	A	1216	2	1	1956	5	61	1	4	3	6	4	1	2	2	2	2		2	1					1		2		2			2		2					2
赵丹	A	1217	2	2	1980	11	37	1	3	3	6	1	1	1	2	3	2		2	1					2		2		2			2		2					2
唐强	A	1218	2	2	1985	1	32	1	1	6	4	4	1	2	2	1	2		2	1					1	15	2		2			1	3	2					2
王斐	A	1221	2	1	1984	6	33	1	5	6	6	4	1	2	1	2	2		2	1					2			3	2			2		1	2				2
郭昭阳	A	1222	1		1975	2	42	1	4	3	4		1	2	2	2	2		2	1					2		2		2			1	5	2					2
孙丽群	A	1223	2	1	1964	8	53	1	3	4	4	4	1	3	1	2	2		2	1					2		1	6	2			1	2	2					2
陈华清	A	1224	2	2	1971	4	46	1	2	3	4	4	1	3	2	3	2		2	1					2		2		2			2		2					2
林冬平	A	1225	2	2	1967	5	50	1	2	2	3	4	1	2	2	3	2		2	1					1	10	2		2			2		2
吴萃明	A	1226	1		1968	6	49	1	2	2	6	4	1	2	2	2	2		2	3	29	20	20		2		2		2			2		2
兰家娥	A	1227	2		1967	12	49	1	3	4	5	1	1	2	1	2	2		2	1					1	30	2		2			2		2					2
唐春凤	A	1228	2	1	1967	12	49	1	3	6	6	4	1	2	2		2		2	1					2		2		1	1		2		2					2
孙爱香	A	1229	2	1	1964	4	54	1	3	1	1	4	1	1	1	1				1					2		2		2			1		2
陈丽霞	A	1230	2	2	1966	2	51	1	4	3	6	4	1	2	1	2	2		2	1					2		2		2			2		1	2	5			3
苏爱荣	A	1231	2	1	1961	7	56	1	3	3	6	4	2	3	2	3	2		2	1					1	30	1	6	2			2		2					2
陈碧玉	A	1232	2	2	1963	7	54	1	2	4	4	4	1	2	2	2	2		2	1					2		2		2			2		2
许儒颜	A	1233	2	2	1982	11	35	1	1	1	1	4	1	3	1	2	2		2	1					1	14	2		2			2		2					2
韩素环	A	1234	2	2	1965	7	52	1	4	3	4	4	1	3	2	2	2		2	1					1	20	2		2			2		2
王玉花	A	1235	2	1	1962	10	55	1	2	6	4	4	1	1	1	2	2		2	1					1	30	2		2			2		1	3			5	2
赵京	A	1236	2	2	1961	11	55	1	4	3	4	4	1	3	2	2	2		2	1					2		2		2			2		2					2
肖春美	A	1237	2	2	1964	6	53	1	2	6	3	4	2	2	2	2	2		2	1					2		2		1	4		2		1	3	2		1	2
彭亚湖	A	1238	2	1	1965	7	53	1	1	1	4	4	1	2	2	2	2		2	1					1	30	2		2			2		2
苏开太	A	1239	1		1965	5	52	1	2	1	3		1	1	2	3	2		2	3	16	36	20		1	36	2		2			2		1	2				2
陈亚强	A	1240	1		1967	9	50	1	3	3	2	4	1	3	2	2	2		2	3	20	30	10		2		2		2			2		2					3
陈小芳	A	1242	2	2	1989	2	28	1	5	3	2	5	1	3	2	2	2		2	1					2		2		2			2		2					2
苏轼	A	1243	1		1993	12	24	1	3	3	4	5	1	2	2	2	2		2	3	11	13	15		1	24	2		2			2		2
苏辉	A	1244	1		1991	12	26	1	1	3	4	4	1	2	2	2	2		2	1	18	8	15		1	26	2		2			2		2
冯忠	A	1248	1		1967	5	50	1	4	6	6		1	2	2	3	2		2	3	22	28	20		1	28	2		2			2		2					2
孙秀珍	A	1249	2	2	1980	8	37	1	4	6	4	1	1	2	2	2	2		2	3	26	11	8		1	17	2		2			1	234	1	3	3	14		3
王燕	A	1250	2	2	1964	12	53	1	3	1	2	4	1	2	1	2	2		2	1					2		2		2			1	4	2					2
邢少云	A	1255	2	2	1962	1	55	1	2	2	3	4	1	3	2	2	2		2	1					2		2		2			2		2					2
张粉叶	A	1257	2	1	1964	4	53	1	2	4	4	4	1	3	2	2	2		2	2					2		2		2			2		2
刘天月	A	1258	2	1	1966	8	51	1	2	6	3	4	1	2	2	2	2		2	1					1	28	2		2			2		2					2
王身强	A	1259	1		1962	10	55	1	2	4	2		1	1	2	3	2		2	3	18		10				2		2			2		2					2
黎盛梅	A	1260	2		1966	1	51	1	2	1	4	4	1	3	1	3	2		2	1					2		2		2			2		2
陈传亮	A	1261	1		1959	12	57	1	3	2	3		1	2	2	2	2		2	1					2		2		2			2		2
王文英	A	1262	2	1	1963	2	54	1	2	1	3	4	1	2	2	3	2		2	1					2		2		2			2		2
陈美妙	A	1263	2	2	1961	5	26	1	4	3	3	5	1	3	2	3	2		2	1					1	2	2		1	1		2		2
陈世儒	A	1264	2	1	1961	2	56	1	3	2	3	4	1	2	2	3	2		2	1					1	15	2		2			2		2
陈昭良	A	1265	1		1992	4	25	1	4	3	6	5	1	3	2	3	2		2	2	23	2	6		1		1	7	2			2		2					2
何瑞友	A	1266	1		1962	7	55	1	1	2			1	3	2	2	2		2	1					2		2		2			2		2					2
杨金英	A	1267	2	1	1958	9	59	1	2	6	2	4	1	2	1	2	2		2	1					1	30	2		2			2		2					2
吴喜全	A	1268	1		1958	12	59	1	2	1	4		1	3	1	3	2		2	3	15	44	15		1	44	2		2			2		2					2
李书姣	A	1269	2	2	1986	8	31	1	3	6	3	5	1	2	2	3	2		2	1					1	15	2		2			2		2					2
吴菊兰	A	1270	2	1	1962	6	55	1	1	6	3	4	1	2	2	2	2		2	1					1	30	2		2			2		2					2
陈小位	A	1271	2	2	1984	7	33	1	2	6	4	4	1	3	2	2	2		2	1					2	11	1	1	2			2		2					2
曾令龙	A	1272	1		1982	1	35	1	4	1	2	4	1	3	2	3	1	6	2	3	14	18	10		2		2		2			2		2					2
吴娇香	A	1274	2	1	1963	4	54	1	2	1	3	4	1	2	2	3	2		2	1					2		2		2			2		2
朱球深	A	1275	1		1960	2	57	1	3	6	2		1	3	2	2	2		2	2	40	6	3				2		2			2		2
蔡兴仔	A	1276	2		1965	9	52	1	2	4	3	4	1	2	2	2	2		2	1					2		2		1	1		2		2					2
方振富	A	1277	1		1964	8	53	1	2	4	4	4	1	2	2	2	2		2	1					2		2		2			2		2
方起聪	A	1278	1		1986	11	31	1	4	3	5	4	1	2	2	2	2		2	1	17	14	20		1	8	2		2			2		2
方振书	A	1279	1		1968	11	48	1	2	2	4	4	1	2	2	2	2		2	3	28	20	40		2		2		2			2		2
赖广秦	A	1281	2	2	1983	1	34	1	4	3	3	4	1	2	2	2	2		2	1					1	10	2		2			1	3	2					2
刘志惠	A	1282	2	2	1966	1	51	1	3	1	6	4	1	3	2	3	2		2	1					2		2		2			1	35	2
黄虹	A	1283	2	2	1988	3	29	1	4	6	5	5	1	2	2	2	2		2	1					2		2		2			2		2					2
吴燕珍	A	1284	2	2	1991	12	26	1	4	3	5	5	1	2	1	2	2		2	1					1	10	1	7	1	7		2		2					2
吴广才	A	1285	1		1964	7	53	1	3	1	4		1	2	2	2	2		2	1					2		2		1	2		2		2					2
林灵	A	1286	2	2	1990	3	27	1	4	6	6	5	1	2	1	2	2		2	1					2		1	4	1	4		2		2					2
肖银秀	A	1287	2	1	1980	1	38	1	2	6	5	4	1	3	2	3	2		2	1					1	10	2		2			2		2
周春香	A	1289	2	2	1983	2	34	1	2	4	5	4	1	2	2	2	2		2	1					1	7	2		1	2		2		2
蔡逢雄	A	1291	1		1964	10	53	1	3	3	3		1	1	1	2	2		2	3	19	34	20				2		2			2		1	1	5			2
蔡时德	A	1292	1		1943	10	74	1	2	6	3		1	2	2	3	2		2	1					1	6	2		2			2		2
付冬芬	A	1293	2	1	1957	12	60	1	1	1	3	4	1	3	2	3	2		2	1					2		2		2			2		2					2
麦典书	A	1294	1		1980	12	36	1	2	4	3		1	3	2	2	2		2	3	20	17	20				2		2			2		2					2
史文江	A	1295	1		1957	5	60	1	2	4	3		1	3	2	3	2		2	3	40	20	20		2		2		2			2		2					2
洪亚娃	A	1299	2	2	1990	12	27	1	4	3	6	1	1	2	2	2	1	6	2	1					1		1	1	1	1		1	3	2					2
朱龙梅	A	1300	2	2	1950	12	67	1	1	4	2	4	1	3	2	3	1	6	2	1					1	40	2		1	1		2		2					2
吴育群	A	1301	2	2	1979	2	38	1	3	4	4	4	1	3	2	2	2		2	1					1		2		2			1	4	2					2
陈彩珍	A	1302	2	2	1986	12	30	1	4	6	3	4	1	2	2	2	2		1	1					2		2		2			2		2					2
廖忠智	A	1304	1		1967	11	50	1	3	6	5		1	2	2	2			2	1					2		2		2			2		2
王凤珍	A	1308	2	1	1955	12	62	1	2	4	5	4	1		2	2	2		2	1					1	30	2		2			2		2					2
王华凤	A	1310	2	2	1982	11	34	1	4	6	5	4	1	2	2	2	2		2	1					1	10	2		2			2		2
陈雄	A	1312	1		1963	12	54	1	2	6	5		1	3	2	2	2		2	1					2		2		2			2		2					2
刘静楼	A	1313	2	1	1987	8	30	1	3	1	3	4	1	3	2	3	2		2	1					1	12	2		2			2		2
刘会荣	A	1314	2		1978	9	39	1	3	3	2	4	1	2	2	3	2		2	1					2		2		2			2		2
符小妹	A	1317	2	2	1981	1	36	1	2	1	2	4	1	3	2	2	2		2	1					2		1	1	2			1	3	2					2
吴志忠	A	1320	1		1969	3	48	1	3	6	1		1	3	2	2	2		2	1					2		2		2			2		2
黄海梅	A	1321	2	2	1989	12	28	1	4	6	6	5	1	2	2	2	2		2	1					1	20	1	1	1	7		2		2					2
周亚霞	A	1323	2	2	1981	1	36	1	2	4	5	4	1	2	2	2	2		2	1					1	5	2		2			2		1	3	3			3
陈小宁	A	1324	2	2	1980	2	37	1	4	1	3	1	1	2	1	2	2		2	1					1		2		2			2		2					2
曾德强	A	1326	1		1964	4	53	1	2	1	3		1	2	2	3	2		2	3	30	23	10		1	10	2		2			1	24	1	1	2		12	2
冯积义	A	1327	1		1969	10	50	1	4	3	5		1	2	2	3	2		2	1					2		2		2			1	3	2
杨宇	A	1328	1		1983	11	34	1	3	2	5		1	3	2	2	2		2	3	30	4	10		2		2		2			2		2					2
胡旭菊	A	1329	2	2	1982	11	35	1	3	3	1	4	2	1	2	2	2		2	1					1	10	2		2			1	3	2					2
王宁	A	1331	1		1989	8	28	1	4	6	6		1	3	2	2	2		2	1					2		2		2			2		2
李照新	A	1332	2	2	1991	2	26		4	6	3	5	1	2	2	2	2		2	1					2		2		2			2		2					2
文姑	A	1337	2	2	1991	1	26	1	4	6	1	5	1	3	1	2	2		2	1					2		2		2			2		2					2
王晓奇	A	1340	1		1966	3	51	1					1	2	1	2	2		2	3	20	32					2		2			2		2
冯俊霄	A	1341	1		1985	11	31	1	4	3	5	4	1	3	2	2	2		2	1					2		1	1	1	4		1	2	2					2
王惟珊	A	1344	1		1961	6	56	1	2	2	4		1	2	2	2	2		2	3	18	40	20		2		2		2			2		2					2
王科舒	A	1345	1		1990	1	27	1	4	3	6		1	3	2	2	2		2	1					1	4	2		2			2		2					2
王昌龙	A	1347	1		1974	7	43	1	2	1	3	4	1	1	1	2	2		2	1	25	18	20		2		2		2			2		2
苏洗	A	1348	2	2	1989	9	28	1	4	3	6	5	1	1	1	2	2		2	1					2		2		2			2		2					2
王临凤	A	1351	2	2	1993	9	24	1	3	3	4	5	1	3	1	2	2		2	1					1		2		2			2		2					2
王嘉璇	A	1352	2	2	1988	7	29	1	4	3	6	1	1	3	2	3	2		2	1					2		2		2			2		2					2
王琼香	A	1353	2	1	1949	5	68	1	2	1	2	4	1	2	2	3	2		2	1					2		2		1	1		2		2
王其伟	A	1354	1		1970	8	47	1	4	6	2	5	1	3	2	2	2		2	1					1	8	2		2			2		2
林先添	A	1356	1		1989	9	28	1	4	3	5		1	2	1	1	2		2	3	20	8	20		1	10	2		2			2		2					2
林先良	A	1357	1		1991	5	26	1	4	3	4		1	2	2	2	2		2	1					1	26	2		2			1	24	2					2
钱才玉	A	1358	2	2	1991	10	26	1	4	3	6	4	1	2	2	2	2		2	1					1	26	2		2			1	2	2					3
林全	A	1359	1		1968	11	50	1	3	1	2		1	3	2	2	2		2	3	20	30	20				2		1	7		2		1	3
符婕妤	A	1361	2	2	1993	4	24	1	4	3	5	3	1	3	2	2	2		2	1					2		2		2			1	23	2					2
谢儒雅	A	1362	2	2	1995	9	22	1	4	3	4	5	1	3	1	2	2		2	1					1		1	1	2			1	12	2					3
黄丹宇	A	1363	2	2	1995	8	22	1	4	3	4	5	1	3	1	2	2		2	1					2		2		2			1	24	2					2
徐怡婷	A	1364	2	2	1991	1	26	1	4	3	1	5	1	2	1	3	2		2	1					1		2		2			2		2
王梅	A	1371	2	2	1983	10	34	1	3	3	1	5	1	3	1	2	2		2	1					1		1	1	1	1		2		2
邓美飞	A	1372	1		1985	12	31	1	3	3	1	5	1	3	2	2	2		2	1					1		2		2			2		2
张群方	A	1373	2	1	1954	1	64	1	1	4	3	4	1	2	2	2	2		2	1					1	37	2		2			2		2					2
何玉丹	A	1374	2	2	1988	2	30	1	2		1	4	1	3	2	2	2		2	1					2		1	1	2			2		2
阮友	A	1375	1		1968	11	49	1	2	6	3		1	3	2	2	2		2	1					2		2		2			2		2					2
何小琴	A	1378	2	2	1981	6	36	1	2	2	1	5	1	3	2	2	2		2	1					2		2		2			2		2
纪毓胜	A	1379	1		1958	11	58	1	3	1	3	4	1	3	1	1	2		2	1					2		2		2			2		2					2
蔡笃雄	A	1385	1		1988	5	29	1	4	6	5	4	1	2	2	2	2		2	1					2		1	1	2			1	3	2					2
云驹	A	1386	1		1987	12	30	1	4	6	5		1	3	2	2	2		2	1					2		1	1	2			2		2
黎治桃	A	1388	2	1	1958	3	61	1	2	2	3	1	1	2	1	2	2		2	1					1	40	2		2			2		2					2
梁如秋	A	1389	2	2	1980	10	37	1	2	3	4	4	1	3	2	3	2		2	1					1	16	2		2			2		2					2
林妚六	A	1391	2	1	1941	5	76	1	0	6	3		1	2	2	2	2		2	1					2	30	2		2			2		2					2
陈树新	A	1393	1		1971	2	46	1	3	2	4		1	2	2	2	2		2	1					1	10	2		2			1	4	2
陈玉林	A	1394	1		1973	1	44	1	4	6	6	4		1	2	2	2		2	3					2		2		2			2		2					2
陈小烂	A	1399	2	2	1986	9	32	1	4	6	5	4	1	3	1	2	2		2	1					2		2		2			1	3	2					2
姚妙春	A	1402	2	1	1959	9	68	1	3	1	6	4	1	2	2	2	2		2	1					1	7	2		2			2		2					2
范金文	A	1405	1		1964	2	53	1	4	1	5		1	2	2	2	2		2	3	20	15	20		2		2		2			2		2					2
廖菀彤	A	1409	2	2	1992	7	27	1	4	3	5	5	1	3	1	1	2		2	1					1	27	2		2			1	1	2					2
杨雪	A	1410	2	2	1993	7	24	1	4	5	5	4	1	2	2	2	1	6	2	1					1		2		1	1		1	2	2					2
刘启标	A	1415	1		1962	6	55	1	3	3	3		1	1	2	2	2		2	3	17	40			2		2		2			2		2					2
吴丹	A	1417	2	2	1986	1	32	1	4	3	6	4	1	2	2	2	2		2	1					1	2	2		2			2		2
周经壶	A	1422	1		1947	6	70	1	2	1	3		1	3	2	2	2		2	3	25	40	20		2		2		2			2		2					2
何中诚	A	1430	1		1963	9	54	1	3	4	4		1	2	2	2	2		2	1					2		2		2			2		2					2
梁定国	A	1431	1		1947	6	70	1	3	1	3		1	1	2	2	2		2	3	30	40	10		2		2		2			2		2
陈志诚	A	1433	1		1963	4	54	1	2	1	4	4	1	2	2	3	2		2	1					2		2		2			2		2					2
朱仲德	A	1437	1		1958	3	59	1	2	1	6		1	1	2	3	2		2	2	15	7	40		2		2		2			2		2					2
周健	A	1438	1		1990	9	27	1	4	3	4		1	3	2	2	2		2	2	24	3	1		1		2		2			1	3	2					2
钟秀玲	A	1439	2	2	1986	6	31	1	3	6	6	4	1	2	2	2	2		2	1					1		2		2			2		2					2
陈擎天	A	1443	1		1964	7	53	1	3	3	5		1	2	2	2			2	1					2		2		2			2		2					2
王乃琴	A	1444	2	1	1940	8	77	1	3	1	5	4	1	2	2	3	2		2	1					2		2		2			2		2
李壮国	A	1445	1		1987	12	29	1	4	3	5	4	1	2	2	2	2		2	2	18	11			2		2		2			2		2					2
周少仁	A	1452	2	2	1992	8	25	1	3	3	1	5	1	3	2	3	2		2	1					2		2		2			2		2					2
周少霞	A	1453	2	2	1985	11	31	1	4	3	5	4	1	2	2	2	2		2	1					2		2		2			1	3	2
许振聪	A	1454	1		1981	10	36	1	4	3	4		1	3	2	2	2		2	2	20	16					2		2			1	4	2
黄玉	A	1456	2	2	1987	5	30	1	4	3	5	4	1	2	1	2	2		2	1					1	2	2		1	7		2		2
符肖静	A	1457	2	2	1990	9	27	1	4	3	4	4	1	2	2	2	2		2	1					1	20	2		2			2		2					3
李坤朋	A	1458	1		1990	11	27	1	4	3	4	4	1	2	2	2	2		2	1					1	27	2		2			2		2					3
梁兰	A	1460	2	2	1978	1	39	1	1	4	4	4	1	1	2	3	2		2	1					1	13	2		2			2		2
张桂华	A	1461	1		1961	9	56	1	3	1	6	4	1	3	2	3	2		2	1					2		2		2			2		2
海元平	A	1462	1		1991	1	26	4	5	3	6	4	1	3	2	2	2		2	1					2		2		2			1	345	2					2
耿国林	A	1466	1		1955	7	63	1	3	3	5	4	1	1	2	2	2		2	1					2		2		2			2		2
郑茹	A	1467	2	2	1991	9	26	1	4	1	5	5	1	3	2	2	2		2	1					2		2		2			2		2
贾东振	A	1469	1		1956	11	61	1	4	3	5	4	1	1	2	3	2		2	1					2		2		2			2		2					3
廖玉娟	A	1470	2	2	1981	1	36	1	3	4	6	4	1	2	2	2	2		2	1					1	8	2		2			2		2					2
王小惠	A	1471	2	2	1989	9	28	1	4	3	1	5	1	2	2	2	2		2	1					1	28	2		2			2		2					2
姚俊清	A	1474	1		1958	2	59	1	3	3	5	4	1	1	2	3	2		2	2	17	42	40		2		2		2			1	4	2
陈秀兰	A	1480	2	1	1947	1	70	1	1	1	3	4	1	3	2	2	2		2	1					2		2		2			1	5	2					2
沈强	A	1482	1		1991	6	26	1	4	6	4		1	1	2	1	2		2	2	21	1	10		2		2		2			2		2					2
祝婉容	A	1484	2	2	1994	7	23	1	4	5	5	5	1	2	1	2	2		2	1					1	10	2		2			1	5	2					2
等芳珠	A	1485	2	2	1994	8	23	1	4	5	5	5	1	3	2	2	2		2	1					2		2		2			2		2					2
许月萍	A	1486	2	2	1994	5	23	1	4	3	4	5	1	3	2	3	2		2	1					2		2		2			2		2					2
林惠妹	A	1489	2	1	1956	3	61	1	1	2	3	4	1	1	2	2	2		2	1					1	20	2		2			2		2					2
周生鹰	A	1490	1		1968	5	49	1	2	2	4	4	1	1	2	3	2		2	1					2		2		2			2		2
邓香珠	A	1491	2	2	1992	12	25	1	4	3	4	5	1	3	2	2	2		2	1					1		2		2			2		2					2
黄啟连	A	1493	2	2	1980	4	37	1	2	1	5	4	1	2	2	2	2		2	1					1	12	2		2			1	3	2					2
文兰	A	1494	2	2	1992	9	25	1	4		3	5	1	2	2	2	2		2	1					2		2		2			2		2
符夏嫚	A	1495	2	2	1992	10	25	1	4	3	5	5	1	1	2	2	2		2	1					1	1	2		2			2		2					2
张帅丽	A	1496	2	2	1991	6	26	1	4	3	3	5	1	2	2	2	2		2	1					2		2		2			2		2
杜定华	A	1497	1		1964	7	53	1	2	2	3	4	1	2	2	2	2		2	2	22	30	1		2		2		2			2		2
许玉环	A	1500	2	2	1987	3	30	1	2	3	5	4	1	2	2	2	2		2	1					1	9	2		2			2		2
唐莎	A	1501	2	2	1989	3	37	1	4	3	6	1	1	3	2	2	2		2	1					2		2		1	2		2		2					2
王小清	A	1503	2	2	1989	10	28	1	4	6	3	4	1	2	1	1	2		2	1					1	10	2		2			2		2
王小婷	A	1504	2	2	1992	6	25	1	4	3	6	5	1	2	1	2	2		2	1					2		2		2			2		2
王连	A	1505	2	2	1978	9	39	1	1	1	2	4	1	2	2	2	2		2		1				1		2		2			2		2					2
叶凤昌	A	1507	1		1967	10	50	1	3	3	4		1	3	2	3	2		2	3	30	10	15		1	6	2		2			2		2					2
何婷	A	1508	2	2	1989	9	28	1	4	4	6	4	1	3	1	2	2		2	1					1		1	1	2			2		2					3
朱铁军	A	1509	1		1984	6	33	1	3	2	5		1	1	1	2	2		2	1					1		2		2			2		2
叶周	A	1510	1		1986	10	32	1	3	1	1		1	3	1	2	2		2	3	28	4	20		2		2		2			2		2
吴其标	A	1511	1		1970	6	47	1	2	3	4		1	2	2	2	2		2	2					2		2		2					1	1	2	8	15	3
陈宗雅	A	1512	1		1985	2	32	1	3	6	6		1	2	2	3	2		2	1					2		2		2			2		2					2
邓丽玉	A	1513	2	2	1981	5	36	1	4	3	4	4	1	3	2	2	2		2	1					2		2		2			2		2					2
周德群	A	1517	1		1960	4	57	1	3	3	5		1	2	2	2	2		2	1					2		2		2			1	5	1	2				2
陈燕	A	1520	2	2	1992	4	25	1	2	1	4	4	1	3	2	3	2		2	1					1	24	2		2			2		2					2
吴慧芳	A	1524	2	2	1995	7	22	1	4	3	3	4	1	2	2	3	2		2	1							1	14	1	1		1	4	2					2
李业武	A	1525	1		1991	7	26	1	4	3	5		1	3	2	3	2		2	3	16	11	20		1	2	2		2			2		2					3
林华	A	1526	1		1974	10	43	1	4	6	4		1	2	2	3	2		2	1					2		2		2			2		2
李日奋	A	1527	1		1982	1	35	1	3	1	4		1	3	2	2	2		2	1					2		2		2			1	3	2					2
洪清花	A	1528	2	2	1990	2	27	1	2	3	1	5	1	2	2	2	2		2	1					2		2		2			2		2
李程文	A	1529	2	2	1989	10	28	1	1	3	1	4	1	2	1	2	2		2	1					1	7	2		2			2		2
黄小梅	A	1530	2	2	1992	11	25	1	4	3	4	5	1	2	2	2	2		2	1					2		2		2			2		2					2
曹兰兰	A	1533	2	2	1990	5	27	1	4	6		4	1	2	1	3	2		2	1					1	5	2		2			2		2
林腾	A	1534	1		1990	8	27	1	4	3	6	4	1	1	1	2	2			3	21	6	10		2		2		2			2		2					2
陈仲道	A	1539	1		1976	5	41	1	3	3	4		1	3	2	2	2		2	3	31	10	5		1	10	2		2			2		2
梁泽利	A	1540	1		1979	8	38	1	2	1	4		1	3	2	2	2		2	3	28	10	20		1		2		1	1		2		2
邱燕菊	A	1543	2	2	1995	1	22	1	3	3	4	5	1	3	2	2	2		2	1					2		2		1	1		1	4	2					2
夏毅	A	1545	1		1979	5	38	5	4	3	6		1	2	1	2	2		1	2	17	19	7		1	20	2		2			2		2
蔡汝柳	A	1546	1		1988	8	29	1	4	3	2	4	1	2	1	2	2		2	3	19	10	20		2		2		2			1	3	2					2
纪王夏	A	1547	2	2	1990	4	27	1	4	6	1	4	1	2	1	2	2		2	1					1	2	2		2			2		2
吴萍	A	1548	2	2	1993	8	24	1	4	3	6	5	1	2	1	2	2		2	1					2		2		2			2		2					2
张毅	A	1549	1		1983	9	34	1	4	3	6		2	2	2	2	2		2	2	20	12			1	12	2		2			2		2					2
张家林	A	1550	1		1956	6	61	1	3	3	6		1	2	1	2	2		2	2	20	40	6		2		1	3	2			2		2
程守旭	A	1553	1		1985	9	32	1	2	3	3		1	2	1	2	2		2	1					2		2		2			2		2					2
程范婷	A	1558	2	2	1991	7	26	1	4	6	6	4	1	1	2	3	2		2	1					1	10	2		1	1		2		2					2
周润广	A	1559	1		1989	12	28	1	4	3	6		1	3	1	2	2		2	1					1	3	2		2			2		2					2
陈刚保	A	1561	1		1982	6	34	1	2	2	3	4	1	3	2	2	2		2	1					1		2		2			2		2					2
吴静	A	1562	2	2	1990	5	27	1	2	3	3	4	1	3	1	2	2		2	1					1	5	2		2			2		2					2
唐曦	A	1564	1		1982	8	35	1	5	1	6		1	3	1	1	2		2	1					2		1	1	2			1	3	2					2
陈吉	A	1569	2	2	1991	8	26	1	4	3	6	5	2	3	2	2	2		2	1					2		2		2			2		2					3
宋涛	A	1570	1		1976	10	41	1	4	3	6	4	1	3	2	2	2		2	1							2		2			2		2					2
李自涛	A	1573	1		1982	8	35	1	4	3	5		1	3	2	3	2		2	1					2		2		2			2		2
曾令文	A	1576	1		1963	4	54	1	4	6	4		1	3	1	2	2		2	1					2		1	1	2			1	4	1	1	5
吴柏清	A	1580	1		1978	3	39	1	2	6	6	4	1	1	2	3	2		2	3	15	24	40				2		2			2		2
陈钟献	A	1582	1		1980	10	37	1	3	3	2		1	3	1	2	2		2	3	25	12	3		2		2		2		2		2	2					2
陈昌蓉	A	1585	2	2	1989	12	27	1	4	3	2	5	1	2	2	2	2		2	1					1	10	1	1	2			2		2
梁定恩	A	1586	1		1976	7	41	1	2	4	1		1	2	2	3	2		2	3	31	10	20		2		2		2			2		2
黄守庆	A	1594	1		1980	12	37	1	4	3	3	4	1	2	2	2	2		2	1					2		2		2			2		2					2
符文兴	A	1596	1		1990	3	28	1	4	6	3		1	2	2	2	2		2	1					2		2		2			2		2					2
王开良	A	1597	1		1989	8	29	1	4	6	5	4	1	3	2	2	2		2	1					2		1	1	2			2		2					2
马心良	A	1599	1		1978	9	38	1	4	3	4		1	3	2	3	2		2	3	12	12	20		2		2		2			2		2					2
李高乐	A	1606	1		1985	12	32	1	4	6	4		1	3	1	2	2		2	1					2		2		2			2		2					2
许卫铠	A	1607	1		1980	6	37	1	2	2	3		1	3	2	2	2		2	1					1	30	2		2			1	4	2					2
吴坤河	A	1611	1		1977	12	39	1	3	3	4		1	2	2	2	2		2	2	20	40					2		2			1	3	2					2
何川	A	1620	1		1981	11	36	1	4	6	1		1	3	2	2	2		2	1					2		2		2			1	4	2					2
陈斌	A	1621	1		1981	9	36	1	4	3	5		1	2	2	2	2		2	1					2		2		2			2		2
苏魁范	A	1623	1		1983	1	34	1	5	6	6		1	1	2	2	2		2	3	20	15	20		1		2		2			2		2					2
罗盛洁	A	1626	2	2	1993	11	24	1	4	5	4	5	1	3	2	2	2		2	1					2		2		2			2		2
安清芝	B	1	2	1	1944	9	72	1	2	1	4	4	1	2	2	3	2		2	1					1	40	2		2			2		2
郑明亮	B	2	1		1942	2	75	1	1	1	4	4	1	2	2	3	2		2	3	25	50	3		2		2		2			2		2
吴海燕	B	3	2	2	1965	2	52	1	3	6	3	4	1	2	2	2	2		2	1					1		2		2			2		2					2
陈和梅	B	4	2	1	1962	12	55	1	3	6	3	4	1	3	2	2	2		2	1					1	30	2		2			1	45	1	2	2			2
汪玉琼	B	5	2	1	1965	2	52	6	3	3	3	4	1	2	1	1	2		2	1					1		1	4	2			2		2
张海云	B	6	2	2	1961	11	55	1	3	1	3	4	1	1	2	2	2		2	1					2		2		2			2		2
王少花	B	7	2	2	1961	2	53	6	2	6	2	4	1	3	2	2	2		2	1					1		2		2			2		2					2
王玉美	B	8	2	2	1965	8	52	6	3	3	2	4	1	2	2	2	2		2	1					1	2	2		2			2		2					2
郑燕军	B	9	1		1967	8	49	1	3	1	2		1	2	2	2	2		2	3	30	19	30		1	20	2		2			2		2					2
粱桂霞	B	10	2	1	1960	10	56	1	0	2	3	4	1	2	2	3	2		2	1					2		2		2			2		2
王庭春	B	11	1		1946	12	70	1	1	2	4	4	1	1	2	3	2		2	1					1	40	2		2			2		2					2
曲小燕	B	12	2	1	1960	2	57	6	3	1	3	4	1	1	2	2	2		2	1					2		2		2			2		2
杨大雄	B	13	1		1962	12	55	1	2	1	4	4	1	3	2	3	2		2	3	55	35	40				2		2			2		2
范海宾	B	14	2	1	1967	10	50	1	2	1	4	4	1	1	2	2	2		2	1					2	30	2		2			2		2
王丽霞	B	15	2	2	1978	2	39	1	3	6	2	4	1	3	2	3	2		2	1					1	10	2		2			2		2					2
陈朝南	B	16	1		1966	5	51	1	2	6	3	4	1	1	2	3	2		2	2	25	25	2				2		2			2		2
杨维娟	B	17	2	2	1964	1	53	1	2	6	3	4	1	2	2	3	2		2	1					1	20	2		2			2		2
冼月英	B	18	2	2	1957	4	60	6	0	6	5	4	1	2	2	3	2		2	3	9	49	10		2		2		2			2		2					2
王开雄	B	19	1		1957	10	59	6	3	1	3	4	1	2	1	2	2		2	1					1	30	2		2			2		2					2
莫雅	B	20	2	2	1981	5	36	1	3	4	2	4	1	2	2	1	2		2	1					1	20	2		1	6		2		2					2
符少娟	B	21	2	2	1966	4	51	6	2	6	3	4	1	2	2	3	2		2	1					1	28	1	6	2			2		2
符玉萍	B	22	2	1	1950	10	66	6	1	2	3	4	1	3	2	3	2		2	1					2		2		2			2		2					3
梁爱妹	B	23	2	1	1982	10	34	1	2	4	2	1	1	2	1	2	2		2	1					1	20	2		2			2		2					2
曾玉花	B	24	2	1	1948	6	69	1	1	4	2	4	1	2	2	2	2		2	1					2		2		2			2		2					2
杨明炎	B	25	1		1954	9	63	1	4	6	1	4	1	2	2	3	2		2	1					2		2		2			2		2					2
黄桂英	B	26	2	2	1965	5	52	6	3	1	4	4	1	2	2	3	2		2	2					2		2		2			2		2					2
叶大常	B	27	1		1961	7	56	1	2	1	4	4	1	3	2	3	2		2	3	20	40	20				2		2			2		2
郑燕莲	B	28	2	2	1962	5	55	1	3	6	4	4	1	3	2	3	2		2	1					2	30	2		2			2		2
刘菊花	B	29	2	1	1961	11	55	6	3	1	4	4	1	1	2	2	2		2	1					1	8	2		2			2		2					2
黄妚娟	B	30	2	2	1968	6	49	6	2	1	3	4	1	3	2	3	2		2	1					1	20	2		1	1		2		2
陈连旧	B	31	2	2	1972	4	45	1	1	2	3	4	1	1	2	1	2		2	1					1	25	2		1	1		2		2					2
凌亚燕	B	32	2	2	1967	12	49	6	3	6	3	4	1	3	2	3	2		2	1					1	20	2		2			2		2					2
张启忠	B	33	1		1972	8	44	1	2	2	4	4	1	2	1	1	2		2	1					2		1	1	2			2		2
吴尚奋	B	34	2	2	2000	11	16	1	3	5	2	4	1	2	2	2	2		2	1					2		2		1	3		2		2
吴媪婷	B	35	2	1	1980	6	37	1	2	2	3	4	1	3	2	3	2		2	1					1	10	1	7	2			2		2					2
陆原	B	36	2	2	1984	8	32	1	4	3	5	4	1	3	2	3	2		2	1					1	10	2		1	1		2		2					2
黄霞	B	37	2	2	1991	4	26	1	2	2	3	4	2	3	1	2	2		2	1					1	20	2		2			2		2
宋统雄	B	38	1		1960	9	56	1	4	6	5	4	1	1	2	2	2		2	3	18	40	20		2		2		1	1		2		2
宋统莲	B	39	2	1	1965	12	51	1	3	1	4	4	1	2	2	3	2		2	2					2		1	1	1	1		2		2					2
吴玉香	B	40	2	2	1965	2	52	1	3	3	3	4	1	3	2	2	2		2	1					1	20	2		1	1		2		2					2
刘南花	B	41	2	1	1960	12	56	1	2	1	3	4	1	2	2	2	2		2	1					1	10	2		2			2		2
陈必秀	B	42	1		1965	12	53	1	1	1	2	4	1	2	2	3	2		2	3	20	30	19		2		2		2			2		2
张玉兰	B	43	2	1	1950	4	67	1	0	2	2	1	1	3	2	3	2		2	3	50		10		1	15	2		2			2		2
黄万芳	B	44	2	2	1936	11	80	1	0	6	4	4	1	3	2	2	2		2	1					2		2		1	1		2		2
陈永妹	B	45	2	1	1936	4	81	1	0	6	4	4	1	1	2	3	2		2	1					2		2		2			2		2
杨桂梅	B	46	2	1	1946	1	71	1	1	1	3	4	1	2	2	2	2		2	1					1	50	2		2			2		2
陈来珍	B	47	1		1944	11	72	1	2	1	4		1	3	2	3	2		2	3	25	47	5		1	47	2		2			2		2					2
黄琼英	B	48	2	1	1948	6	69	6	0	1	3	4	1	3	2	3	2		2	1					1	40	2		1	1		2		2
黄美	B	49	2	1	1968	8	48	6	2	2	3	4	1	3	2	3	2		2	1					1	18	2		2			1	1	2					2
梁定荣	B	50	1		1965	6	54	1	3	1	3		1	1	2	3	2		2	3	20	33	20		1	33	2		2			1	5	2					2
王月	B	51	2	2	1958	9	59	1	2	1	5	4	1	1	2	2	2		2	1					2		2		2			2		1	1	2	3		2
黄建通	B	52	1		1961	12	55	1	3	1	4		1	2	1	2	2		2	1	22	33	40		1	33	2		2			2		2					2
高元兰	B	53	2	1	1960	8	58	1	2	1	3	4	1	2	2	2	2		2	1					1	40	2		2			2		2					2
杨亚迈	B	55	2	2	1938	1	79	1	1	6	4	4	1	2	2	2	2		2	1					2		2		2			2		2
李振飞	B	56	1		1958	9	58	1	3	1	5	4	1	3	1	1	2		2	3	8	50	40		2		2		2			2		2
苏菊娥	B	57	2	2	1960	12	56	1	2	4	2	1	1	2	2	2	2		2	1					1	3	2		2			2		2					2
符建国	B	58	1		1957	6	60	6	3	3	2		1	2	2	2	2		2	1					2		2		2			2		2
马杨彬	B	59	1		1936	11	80	1	0	6	1	4	1	2	2	3	2		2	3	25	50	1				2		2			2		2					2
曾芳蓝	B	60	2	2	1982	8	34	6	2	4	4	4	1	1	2	3	2		2	1					1	20	2		2			2		2					2
朱雪群	B	61	2	1	1958	11	58	1	0	2	3	4	1	2	2	2	2		2	1					2		2		2			2		2
王天明	B	62	1		1969	12	48	1	4	3	1		1	3	2	2	2		2	3	22	26	40		1	26	1	7	1	1		2		2					2
叶容君	B	63	2	2	1978	9	39	1	2		3	4	1	2	1	2	2		2	1					2		2		2			2		2
陈春兰	B	64	2	1	1966	11	51	6	3	1	3	4	1		2	3	2		2	1					1	5	2		2			2		2
林小霞	B	65	2	2	1982	2	35	1	3	2	4	4	1	3	2	2	2		2	1					1	10	2		2			2		2
陈洁	B	66	2	2	1994	7	23	1	3	3	3	5	1	2	1	2	2		2	1					2		2		1	23		2		2
李响春	B	67	1		1967	4	50	1	3	1	2		1	1	2	3	2		2	1					2		2		2			2		2					2
唐惠玲	B	68	2	2	1969	8	55	1	2	1	3	4	1	2	2	2	2		2	1					1	30	2		2			2		2
叶亚兰	B	69	2	1	1968	11	58	1	3	1	3	4	1	2	2	2	2		2	1					2		1	3	2			2		2
罗瑞娟	B	70	2	1	1939		78	1	1	2	4	4	1	1	2	3	2		2	1					1	50	2		2			2		2					2
陈桂花	B	71	2	2	1957	6	60	6	2	6	4	4	1	3	2	3	2		2	1					2	20	2		2			2		2					3
王昌莲	B	72	2	1	1956	6	61	1	3	1	4	4	1	3	2	2	2		2	1					1	30	2		2			2		2					2
李丽娟	B	73	2	1	1961	5	56	1	3	6	3	4	1	3	1	3	2		2	1					1	20	2		2			2		2					2
李恒瑞	B	74	2	2	1961	5	56	1	2	2	2	4	1	3	2	2	2		2	1					1	30	2		2			2		2					2
黄秀霞	B	75	2	2	1972	9	45	6	3	6	1	4	1	2	2	3	2		2	1					1	15	2		2			2		2					2
李花	B	77	2	2	1967	10	50	6	2	6	1	4	1	3	2	3	2		2	1					2		2		2			2		2					2
陈菊荣	B	78	2	1	1958	7	60	1	1	2	3	4	1	3	2	2	2		2	1					2		2		2			2		2
钟国强	B	79	1		1957	6	60	1	3	6	5	4	1	3	2	2	2		2	1					2		2		2			2		2					2
王海英	B	80	2	1	1967	11	50	6	3	6	3	4	1	2	2	3	2		2	1					1	1	2		1	1		2		2
杨桂英	B	81	2	1	1954	11	62	1	3	6	4	4	1	2	2	2	2		2	1					2		2		2			2		2					3
冯玲香	B	82	2	1	1955	6	62	1	3	1	4	4	1	1	2	2	2		2	1					2		2		2			2		2
蒋西岳	B	83	2	1	1963	9	53	1	2	1	3		1	1	2	2	2		2	1					1	20	2		2			2		2
郭亚美	B	84	2	1	1965	12	51	6	2	6	3	4	1	2	2	3	2		2	1					1	30	2		2			2		2					2
吴盛逋	B	85	1		1965	11	51	1	2	2	3	4	1	2	2	2	2		2	1					2		2		1	1		2		2
王昌菊	B	86	2	1	1958	5	59	1	3	1	4	4	1	1	2	2	2		2	1					2		2		2			2		2
李淑珍	B	87	2	2	1963	9	53	1	2	6	4	4	1	3	2	3	2		2	1					2		2		2			2		2
王昌夏	B	88	2	1	1964	8	52	1	2	2	3	4	1	2	2	2	2		2	1					2		2		2			2		2
黄和梅	B	89	2	1	1960	3	57	1	3	1	3	4	1	2	2	2	2		2	1					1	10	2		2			2		2
朱雪容	B	90	2	2	1958	6	59	1	2	1	4	4	1	3	2	3	2		2	1					1	20	2		2			2		2
叶永安	B	91	1		1965	4	52	6	3	6	4	4	1	3	2	2	2		2	1					1	10	2		1	1		2		2
叶必文	B	92	1		1953	12	63	6	3	1	3	4	1	2	2	3	2		2	3	38	20	20		2		2		2			2		2					2
吴梅花	B	93	2	1	1960	10	57	6	2	6	3	4	1	3	1	2	2		2	1					1	30	1	1	1	1		2		2					2
黄亚容	B	94	2	1	1967	6	50	1	2	1	3	4	1	3	2	2	2		2	1					1	15	2		2			2		2
杨连梅	B	95	2	2	1962	8	56	6	3	6	1	4	1	2	2	3	2		2	1					2		2		2			2		2					2
杨月莲	B	96	2	1	1935	11	78	1	0	1	3	4	1	2	2	3	2		2	1					2		2		2			2		2
郭亚燕	B	97	2	1	1963	8	53	6	2	1	3	4	1	2	2	2	2		2	1					2		2		1	1				2
肖远	B	98	1		1971	10	46	1	3	4	2	4	1	2	2	2	2		2	3	16	30	半				2		2			2		2					2
王明雄	B	99	1		1958	5	59	1	2	1	4	4	1	2	2	2	2		2	1					1	10	2		2			2		2
赖汝琼	B	100	2	2	1957	10	60	1	2	6	3	4	1	1	2	3	2		2	1					2		2		2			2		2
黄春美	B	101	2	2	1955	5	62	6	1	6	4	4	1	2	2	2	2		2	1					2		2		2			2		2
唐桂花	B	102	2	2	1958	4	59	6	2	6	4	4	1	3	2	3	2		2	1					1	10	2		2			2		2
符燕	B	103	2	1	1969	9	47	1	2	2	3	4	1	3	2	2	2		2	1					1	20	2		2			2		2					2
张文鸽	B	104	2	1	1967	6	50	1	3	6	5	4	1	2	2	2	2		2	1					2		2		2			2		2
梁爱云	B	105	2	2	1969	7	48	6	0	6	1	4	1	1	2	3	2		2	1					2		2		2			2		2					2
钟运清	B	106	1		1966	12	51	6	2	6	1	4	1	1	2	3	2		2	1					1	20	2		2			2		2					2
钟武文	B	107	1		1957	7	60	6	2	6	1		1	2	2	2	2		2	1					2		2		2			2		2					2
李春妹	B	108	2	1	1950	6	67	1	0	4	3	4	1	2	2	3	2		2	1					1	15	2		2			2		2
叶关桂	B	109	1		1948	6	70	1	1	2	3	4	1	3	2	3	2		2	1					2		2		2			2		2					2
叶金龙	B	110	1		1983	4	34	1	2	6	4	4	1	2	2	2	2		2	3	14	20	20		2		2		2			2		2
杨菊英	B	111	2	1	1966	2	50	1	2	6	2	1	1	1	2	2	2		2	1					2		2		2			2		2					2
王开国	B	112	1		1976	11	41	6	3	6	3	4	1	2	2	2	2		2	1					1	30	2		2			2		2
杨育英	B	113	2	2	1953	5	64	6	1	6	5	4	1	2	2	2	2		2	1					1	40	2		2			2		2
黄惠梅	B	114	2	2	1952	6	66	6	0	6	1	4	1	3	2	3	2		2	1							2		2			2		2
杨泽美	B	115	1		1938	6	79	1	0	2	4		1	3	2	3	2		2	1					1	20	2		2			2		2					2
曾祥美	B	116	2	1	1992	11	25	6	4	6	1	5	1	2	2	3	2		2	1					1	10	1	3	2			1	2	2					2
叶霞	B	117	2	2	1980	3	37	6	2	4	2	4	1	3	2	3	2		2	1					1	20	2		2			2		2					2
陈定忠	B	118	1		1942	6	75	1	2	6	4	4	1	2	2	2	2		2	1					2		2		2			2		2
张佩玲	B	119	2	1	1943	5	74	1	1	1	4	4	1	2	2	2	2		2	1					2		2		2			2		2
吴春才	B	120	1		1962	7	55	1	3	6	4	4	1	2	2	3	2		2	3	25	30	20				2		2			2		2
祁秀梅	B	121	2	1	1962	2	55	1	3	6	4	4	1	3	2	3	2		2	1					1	30	2		2			2		2
何亚海	B	122	1		1984	1	33	1	3	3	4	4	4	3	2	2	2		2	3	16	17	30		2		2		2			2		2
杨春燕	B	123	2	1	1961	9	56	1	3	6	2	1	1	1	2	1	2		2	1					1	30	2		2			2		2					2
赖将珠	B	124	2	1	1959	12	58	1	3	6	3	4	1	3	2	2	2		2	1					2		2		2			1	3	2					3
李燕	B	125	2	2	1964	6	53	1	2	6	1	4	1	2	2	3	2		2	1					2		2		2			2		2					2
苏德浮	B	126	1		1956	9	61	1	3	3	3		1	1	2	2	2		2	1					1	15	2		2			2		2					2
林桂妹	B	127	2	1	1953	2	64	1	2	6	3	1	1	2	2	2	2		2	1					2		2		2			2		2					2
詹亚荣	B	128	2	2	1964	4	53	1	2	1	4	4	1	3	2	2	2		2	1					1	34	2		2			2		2
兰芳英	B	129	2	1	1940	7	77	1	0	1	3	4	1	2	2	3	2		2	1					2		2		2			2		2
李碧奎	B	130	2	1	1951	10	66	1	2	2	3	4	1	2	2	3				1					1	20	2		1	4		2		2					2
黄志娇	B	131	2	1	1937	4	80	1	0	1	3	4	1	2	2	2	2		2	1					2		2		2			2		2
冯惠芬	B	132	2	1	1940	2	77	1	1	1	4	4	1	2	2	3	2		2	1					2		2		2			2		2
李世奕	B	133	1		1934	1	83	1	1	1	4	4	1	2	2	3	2		2	1					2		2		2			2		2
章春玲	B	134	2	1	1963	3	54	1	3	1	4	4	1	2	2	2	1	6	2	1					1	30	2		1	2		2		2
王海柳	B	135	2	2	1984	11	32	1	2	4	2	4	1	2	2	2	2		2	1					2		2		2			2		2
陈兴梅	B	136	2	1	1957	6	60	6	3	1	3	4	1	2	1	1	2		2	1					1	18	2		2			2		2					2
王金兰	B	137	2	2	1958	6	59	6	1	6	4	4	1	2	2	3	2		2	1					1	40	2		2			2		2
陈萍	B	138	2	1	1961	3	56	1	3	6	3	1	1	3	1	1	2		2	1					1	31	1	1	2			1	45	2					1	1
黄才就	B	139	1		1962	6	55	1	3	3	1		1	3	1	2	2		2	2	30	25	10		1	25	2		2			2		2					2
陈燕兰	B	140	2	1	1969	7	48	6	4	6	1	4	1	2	2	2	2		2	1					2		2		2			2		2					2
梁翠英	B	141	2	1	1941	4	77	1	0	1	4	4	1	1	2	2	2		2	1					2		2		2			2		2
朱茂英	B	142	2	2	1968	6	49	1	2	3	3	4	1	2	2	2	2		2	1					1	29	2		2			2		2					2
陈秀荣	B	143	2	1	1951	10	65	1	0	1	3	4	1	2	2	2	2		2	1					2		2		2			1	5	2					2
陆海英	B	144	2	1	1967	5	50	1	3	6	1	4	1	2	2	3	2		2	1					1	30	2		2			2		2					2
陈翠銮	B	145	2	2	1958	6	59	6	3	6	4	4	1	3	2	2	2		2	1					1	30	2		2			2		2
李进梅	B	146	2	1	1959	7	58	6	1	2	3	4	1	1	1	1	2			1					2		2		2			2		2
陈海容	B	147	2	2	1962	12	54	1	2	6	3	1	1	1	2	3	2		2	1					1	20	2		2			2		2					2
李汉云	B	148	1		1949	8	68	1	2	2	3	4	1	2	2	3	2		2	1							2		2			2		2
陈秋云	B	149	2	1	1953	1	64	1	1	2	4	4	1	2	2	3	2		2	1					1	30	2		2			1	5	2	1	5			2
陈体燕	B	150	2	2	1976	7	41	1	3	1	4	4	1	2	2	2	2		2	1					2		1	1	2			2		2
符建荣	B	151	1		1960	11	57	6	3	6	1		1	2	2	2	2		2	1					2		2		1	4		1	4	2					2
梁振勇	B	152	1		1981	6	36	6	2	2	3	4	1	1	2	3	2		2	1					2		2		2			1	3	2	3
李侨玉	B	153	2	2	1980	9	37	1	2	2	3	4	1	1	2	3	2		2	1					2		2		2			1	3	1	3	2
吴明辉	B	154	1		1944	12	73	1	1	2	3		1	2	2	3	2		1	1					2		2		2			2		2					1					1
冯美香	B	155	2	1	1970	10	47	1	2	1	4	4	1	2	2	2	2		2	1					2		2		2			2		2
王玉莲	B	156	2	2	1947	4	70	6	1	6	4	4	1	2	2	3	2		2	1					1		2		2			2		2
王粒燕	B	157	2	1	1963	6	54	1	1	2	3		1	3	2	3	2		2	1					2		2		2			2		1	3	2
吴玉菊	B	158	2	1	1958	2	59	6	1	2	3	4	1	3	2	3	2		2	1					2		2		2			2		2					1	1					1
黄良海	B	159	1		1960	12	57	6	3	3	2	4	1	2	2	3	2		2	3	25	30	2				2		2			2		2					2
蒋引弟	B	160	2	2	1974	4	43	1	2	2	3	4	1	1	2	2	2		2	3	28	17	40		1	6	2		2			2		2
王兰	B	161	2	2	1977	10	40	6	3	3	1	1	1	3	2	2	2		2	1					1	18	2		2			2		2					2
王亚妹	B	162	2	2	1963	5	54	6	3	2	3	4	1	3	2	3	2		2	1					2		2		2			1	5	1	3	2	5	1
王春兰	B	163	2	1	1975	8	44	6	4	1	1	1	1	3	2	2	2		1	1					1	21	2		2			2		2					2
陈花	B	166	2	2	1951	11	66	1	0	6	4	4	1	2	2	3	2		2	1					1	27	2		2			2		2					2
夏志莲	B	167	2	2	1979	8	37	1	3	1	4	4	1	2	1	1	2		2	1					2		2		2			2		2
王忠丽	B	168	2	2	1963	12	53	1		6	1	4	1	3	2	3	2		2	1					1	5	2		2			2		2					2
郭小燕	B	169	2	1	1964	6	53	6	3	6	1	4	1	2	1	2	2		2	1					1	31	2		2			2		2					2
黎升强	B	170	1		1957	12	60	6	1	2	3	4	1	1	2	2	2		2	3	25	35	20		1	40	2		2			2		2					2
陈远海	B	171	1		1968	7	49	1	3	1	4	4	1	2	1	1	2		2	1					2		2		2			2		2
吴兴旧	B	172	2	1	1945	6	71	6	1	2	3	4	1	2	2	3	2		2	1					2		2		2			2		2
陈丽	B	173	2	1	1962	2	55	6	2	2	2	4	1	2	2	2	2		2	1					2		2		2		2	2		2					2
吴燕霞	B	174	2	2	1963	3	54	1	3	6	5	4	1	3	2	2	2		2	1					1	30	2		2			1	5	1	2	2	2
林菊英	B	175	2	2	1968	4	51	6	1	2	1	1	1	1	2	3	1	6	2	1					2		2		2			2		2					2
梁燕	B	176	2	2	1970	11	47	1	3	6	1	4	1	2	2	2	2		2	1					2		1	7	2			1	3	2					2
莫惠霞	B	177	2	1	1953	6	66	1	1	6	1	1	1	2	2	2	2		2	1					1	43	2		2			2		2					2
欧先川	B	178	1		1968	10	49						1	3	2	3	2		2	3	20	30	20		2		2		2			1	3	2
符南花	B	179	2	1	1967	12	48	6	4	6	4	4	1	3	2	2	2		2	1					2		1	7	1	7		1		1	3	2			2
胡香丽	B	180	2	2	1978	3	20	6	2	2	1	4	1	2	2	2	2		2	1					1	10	2		2			2		2					2
陈卫	B	181	1		1971	12	45	1	1	1	1	4	1	2	2	2	2		2	2	20	25	1				2		2			2		2					2
梁友红	B	182	2	2	1936	8	81	1	0	6	4	4	1	2	2	2	2		2	1					1	30	2		2			2		2
杨丽花	B	183	2	2	1960	11	57	1	3	6	4	4	1	3	2	2	2		2	1					1	25	2		2			2		2
陈月霞	B	184	2	2	1960	1	57	6	0	2	2	4	1		2	3	2		1	1					1	20	2		2			2		2					2
韩玲	B	185	2	2	1965	3	52	6	3	1	3	1	1	2	2	3	2		2	1					1	30	2		1	1		2		2					2
刘艳华	B	186	1		1960	8	57	1	3	3	5	4	1	1	2	2	2		2	3		40	10				2		2			1		1	3	2	20	1
杨亚荣	B	187	1		1963	10	64	6	0	6	1	5	1	1	2	2	2		2	1					2		2		2			2		2
王琼珍	B	191	2	2	1952	9	18	1	3	6	4	4	1	2	2	2	2		2	1					1	40	2		1	1		2		1	3	2
罗成裕	B	192	1		1949	12	68	1	3	6	2	4	1	3	2	2	2		2	3	28		20		2		2		2			2		2					2
黄华权	B	193	1		1969	10	48	1	3	3	4		1	3	2	2	2		2	3	20	28	40		1		2		2			2		1	1	2	4	1	3
罗红	B	194	2	1	1957	10	60	1	3	6	3	4	1	3	2	2	2		2	1					2		2		2			2		2					2
张美英	B	195	2	1	1970	7	47	1	2	3	4	4	1	2	2	3	2		2	1					1	18	2		2			2		2
张咸艺	B	196	1		1977	6	44	1	4	3	3		1	2	2	2	2		1	3	16	24	10		2		2		1	4		2		2					2
欧永平	B	197	2	1	1940	10	77	1	1	1	3	4	1	1	2	3	2		2	1					1	10	1	1	1	1	5	2		1	1	2	5		1
刘星惠	B	198	2	1	1955	5	62	1	2	1	3	4	1	2	2	3	2		2	1					1	30	2		2			2		2
甘裕芬	B	199	1		1950	12	67	1	3	6	3		1		2	3	2		2	1					1	10	2		2			2		2	1	2		21
甘越文	B	200	1		1990	2	27	1	3	6	4		1	2	2	3	2		2	1					2		2		2			2		2					2
黄朝英	B	201	2	1	1950	3	67	1	1	1	3	4	1		2	3	2		2	1					1	20	2		2			2		2					2
蓝贵	B	203	2	2	1956	11	61	5	4	6	4	4	1	2	2	3	2		2	1					1		2		2			2		2					2
王仕莲	B	204	2	1	1953	9	64	1	2	6	5	4	1	2	2	3	2		2	1					2		2		1	1		2		2					2
李贞春	B	206	2	2	1980	10	36	1	2	2	3	4	1	3	2	2	2		2	1					1	25	2		2			2		2					2
陈凤孝	B	207	1		1957	9	60	1	4	6	4	4	1	1	2	3	2		2	1					1	38	2		2			2		2					2
徐容娟	B	208	2	1	1970	4	47	1	3	3	4	4	1	2	2	3	2		2	1					1	15	2	7	1	1	5	2		2					2
劳梅花	B	209	2	1	1972	7	45	1	4	3	5	4	1	3	2	2	2		1	1					1	35	2		2			2		2					2
李天君	B	210	1		1978	6	39	1	4	3	5	4	1		2	2	2		2	3	29	10	30				2		2			2		2
岑新霞	B	212	2	2	1979	1	38	1	1	3	3	4	1	2	2	2	2		2	1					2		2		1	1		2		2					2
郑敦三	B	213	1		1958	11	59	1	3	3	5	4	1	1	1	2	2		2	3	28	40	30		2		2		2			2		2					2
李世嘉	B	215	1		1987	4	30	1	4	3	4		1	2	2	2	2		2	2	44		5				2		2			2		2
徐容颜	B	216	2	2	1981	10	36	1	3	3	5	4	1	3	2	2	2		2	1					2		1	7	2			2		2
袁会健	B	217	1		1973	4	45	1	3	3	5	4	1	2	2	3	2		2	3	25	25	48		2		2		2			2		1	3	2
何鹏飞	B	218	1		1977	12	40	1	4	3	5	4	1	2	2	3	2		2	3		20	30		2		2		2			2		2
郑秋菊	B	219	2	2	1974	8	43	1	2	4	3	1	1	3	2	2	2		2	1					1	25	2		2			2		2					2
黄才	B	220	1		1984	10	33	1	4	3	3	4	1	3	2	2	2		2	3	26	7			2		2		2			2		2					3
李自光	B	221	1		1975	2	42	1	3	3	4	4	1	2	2	2	2		2	3	22	20	30				2		2			2		2
邱育强	B	222	1		1967	4	50	1	3	3	5		1	2	2	3	2		2	3	20	20	20				2		2			2		2					2
潘家师	B	223	1		1970	4	47	1	4	3	1	4	1	2	2	2	2		2	3	20	27	20		2		2		2			2		2
唐彩英	B	224	2	1	1969	10	48	1	1	1	3	1	1	2	2	2	2		2	1					1	1	2		2			2		2					2
陈贻梓	B	225	1		1959	10	58	1		3	2		1	2	2	2	2		2	2	27	20	10		1		2		2			2		2					2
李琴	B	226	2	1	1989	11	28	1	3	2	3	4	1	2	2	2	2		2	1					1	10	2		2			2		2
李小妹	B	227	2	2	1071	11	46	1	2	1	4	4	1	2	2	3	2		2	1					1		2		2			2		2					2
严金姑	B	228	2	1	1962	7	55	1	0	2	2	4	1	3	2	2	2		2	1					2		2		2			2		2					2
朱月珍	B	229	2	1	1971	9	46	1	2	1	3	4	1	2	2	2	2		2	1					1		2		2			2		2					2
谭安	B	230	1		1972	9	45	1	4	3	5	4	1	3	2	2	2		2	1					2		2		2			2		2					2
李受江	B	231	1		1960	7	57	1	2	2	3		1	2	2	2	2		2	1					2		2		2			2		2					2
陈科教	B	232	1		1978	10	39	1	4	3	5		1	1	2	2	2		2	1					2		2		2			2		2					2
李广兰	B	233	2	2	1971	2	46	1	2	1	3	4	1	3	2	2	2		2	1					2		2		2			2		2					2
王其祥	B	235	1		1989	7	28	1	3	6	1		1	3	2	2	2		2	3	18	10	15		2		2		2			2		2					2
郑性养	B	236	1		1944	9	69	1	2	2	1	4	1	2	2	2	2		2	1					2		2		2			2		2	3	5			2
朱兴健	B	237	1		1958	11	58	1	3	3	4		1	2	2	2	2		2	3	38	20	50				2		2			2		2
曾秋明	B	238	2	1	1985	2	38	1	2	6	6	4	1	1	2	2	2		2	1					1		2		2			2		2
王选坤	B	239	1		1977	10	40	1	3	2	3		1		2	2	2		2	2	20		1		1	2	2		2			2		2					2
王选武	B	240	1		1971	10	46	1	2	2	3		1	2	2	2	2		2	1					2		2		2			2		2					2
陈玲	B	241	2	1	1976	1	41	1	3	3	5	4	1	3	2	2	2		2	1					2				2					2
王选芳	B	242	1		1962	7	55	1	2	2	3	4	1	3	2	3	2		2	3	25	30	40				2		2			2		2
王丹	B	243	2	2	1995	8	22	1	3	2	4	5	1	1	2	3	2		2	1					1	15	2		2			2		2
王雪芳	B	244	2	1	1970	12	47	1	2	2	1	4	1	3	2	3	2		2	1					1	30	2		2			2		2					2
王友权	B	245	1		1965	10	51	1	2	2	5	4	1	2	2	2	2		2	2	36	15	5		1	10	2		2			2		2					2
符仙玲	B	246	2	2	1975	12	41	1	3	6	5	4	1	2	2	3	2		2						1	20	2		2			1	4	2					2
王霞	B	247	2	1	1986	10	31	1	2	6	2	4	1	2	2	2	2		2	1					1	5	2		2			2		2					3
冯梅芳	B	248	2	1	1978	6	39	1	2	2	4	4	1	2	2	2	2		2	1					1	20	2		2			2		2
王容	B	250	2	2	1977	4	40	1	2	2	3	4	1	2	2	3	2		2	1					1	15	2		2			2		2					2
吴坤波	B	252	2	1	1968	12	49	1	2	2	3	4	1	2	2	2	2		2	1					1	20	2		2			2		2
燕以香	B	253	2	2	1974	2	42	1	2	2	4	4	1	1	2	3	2		2	1					2		2		2			2		2					2
朱祥兴	B	255	2	2	1974	4	44	1	2	2	4	4	1	3	2	3	2		2	1					2		2		2			2		1	3	2
朱德英	B	256	1		1958	8	58	1	3	4	1		1	3	2	2	2		2	3	50	18	48		1	2	2		2			2		2					3
何氏娇	B	260	2	1	1955	1	62	1	0		5	4	1	2	2	2	2		2	1					1		2		2			2		2					2
张永英	B	261	2	1	1941	3	76	1	0	4	1	4	1	3	2	3	2		2	1					2		2		2			2		2					2
李自连	B	262	2	1	1954	1	63	1	0	2	3	4	1	2	2	3	2		2	1					2		2		1	1		2		2					2
林英风	B	264	2	2	1942	3	65	1	2	6	4	4	1	3	2	2	2		2	1					2		2		2			2		2					2
林尧	B	267	2	1	1986	9	30	1	4	6	5	4	1	2	2	3	2		2	1					1	10	2		2			2		2					2
徐华得	B	268	1		1975	1	42	1	4	6	5	4	1		2	2	2		2	3	32	10	20		1	30	2		2			2		2					2
吴英贤	B	269	1		1947	11	70	1	4	3	5		1	3	2	3	2		2	1					1		1	7	1	7		2		2					2
冯菊兰	B	270	2	1	1955	10	62	1	2	6	3	4	1	2	2	3	2		2	1					1	50	2		2			2		2					3
何鹏高	B	273	1		1970	6	47	1	2	3	2	4	1	2	1	2	2		2	3		27	1				2		2			2		2					3
吴乾录	B	274	1		1955	7	62	1	4	6	6		1	2	2	3	2		2	1							2		2			2		2					2
蔡香凤	B	275	2	2	1953	7	64	1	3	6	6	4	1	2	2	2	2		2	1					2		1	7	1	7		1	5	2					2
颜琼月	B	276	2	1	1944	10	73	1	0	6	4	4	1	3	2	3	2		2	1					2		2		2			2		2
黄海洪	B	280	1		1959	5	58	2	3	4	4	4	1	3	2	2	2		2	1					1	2	2		2			2		2					2
劳玉兰	B	281	2	1	1943	8	74	1	0	6	4	4	1	2	2	2	2		2	1					2		2		2			2		2
黄小惠	B	284	2	2	1986	12	30	1	4	3	5	5	1	2	2	2	2		2	1					1	5	2		2			2		2
冯春青	B	285	2	2	1988	8	29	1	2	6	5	4	1	3	2	3	2		2	3	25	3	2		2		2		2			2		2
朱梅	B	286	2	2	1969	8	48	1	0	6	4	4	1	2	2	2	2		2	1					1	35	2		2			2		2
廖厚忠	B	287	1		1963	10	54	1	3	1	3	4	1	2	2	2	2		2	3	25	30	20		2		2		2			2		2					2
徐金玲	B	291	2	2	1977	4	40	1	1	2	3	4	1	1	2	2	2		2	1					2		2		1	7		2		2					2
黄玉花	B	292	2	2	1953	8	64	1	0	2	3	4	1	2	2	2	2		2	1							2		2			2		2					2
廖光和	B	293	1		1953	9	64	1	1	2	3	4	1	2	2	3	2		2	3			30		1	40	2		2			2		2					2
李小燕	B	294	2	2	1957	9	60	1	1	6	4	4	1	3	2	2	2		2	1					2		2		2			2		2					3
刘亚萍	B	296	2	1	1954	6	63	1	1	2	2	4	1		2	3	2		2	1					2		2		2			2		2
李呈超	B	297	1		1953	9	64	1	3	6	2	4	1	2	2	3	2		2	2		10	1		2		2		2			2		2					2
李麒	B	299	1		1982	3	35	1	2	2	3	4	1	1	2	3	2		2	3	25	10	20		2		2		2			2		2
梁梅素	B	300	2	1	1981	11	35	1	2	2	3	4	1		1	2	2		2	1					1	12	2		2			2		2
何康珍	B	323	2	1	1964	7	52	1	4	6	5	4	2		2	3	2		2	1					1	20	1	7	1	7		2		2
祁秀珍	B	325	2	1	1959	2	58	1	3	1	2	4	1	2	2	2	2		2	1					2		2		1	1		2		2
黎玉兰	B	326	2	2	1978	1	38	6	2	6	3	4	1	2	2	2	2		2	1					1	20	2		1	1		2		2
杨菊容	B	327	2	1	1954	1	63	1	3	1	4	3	1	2	2	2	2		2	1					2		2		2			2		2					2
罗世英	B	328	2	1	1940	12	77	5	3	1	4	3	1	3	2	2	2		2	1					2		2		2			2		1	3	2	13	12	3
吴海英	B	329	2	1	1955	2	62	1	2	1	3	3	1	2	2	2	2		2	1					2		2		2			2		2					2
苏菊琼	B	330	2	2	1971	5	46	1	3	6	3	4	1	3	1	1	2		2	1					1	20	2		2			2		2					2
陈全雄	B	331	1		1964	5	53	1	4	3	3		1	3	2	3	2		2	3	25	28	40		1	28	2		2			2		2					2
朱秀芳	B	332	2	1	1968	6	48	1	4	6	5	4	1	2	2	2	2		2	1					2		2		2			2		2
叶世明	B	333	1		1949	12	68	1	3	1	3		1	3	2	2	2		2	3	20	30	20		2		2		2			2		2					2
朱秋霞	B	334	2	2	1969	11	48	1	2	6	3	4	1	1	2	2	1	6	2	1					1	20	2		2			2		2					3
黄凤英	B	335	2	2	1965	6	52	1	3	6	3	4	1	2	1	1	2		2	1					1	2	2		2			2		2					3
张诺凡	B	336	1		1966	12	51	1	4	1	3		1	1	2	2	2		2	1					2		2		2			2		2					2
许妚香	B	337	2	2	1967	12	49	1	2	1	3	4	1	2	2	2	1	6	2	1					2		2		2			2		2					3
曾秀琴	B	338	2	1	1953	2	64	1	2	1	3	4	1	3	2	2	2		2	1					2		2		2			2		2					2
邓芳英	B	339	2	1	1959	4	58	1	3	1	5	4	1	3	1	1	2		2	1					1	10	2		2			2		1	1	2		2	2
纪新裕	B	340	1		1961	2	56	1	3	1			1	2	2	2	1	6	2	3	19	37	20		2	20	2		2			2		2					2
祁香萍	B	341	2	2	1965	7	52	1	3	6	4	4	1	3	2	2	2		2	1					1	25	2		2			2		2
陈雄	B	342	1		1963	5	54	1	3	1	6		1	1	2	2	2		2	3	19	25	10		2	30	2		1	1		2		2					3
李振武	B	343	1		1963	12	54	1	4	3	4	4	1	3	2	3	2		2	3	18	36	10		1	36	2		2			1	3	2					2
祁小浩	B	344	1		1986	4	31	1	4	3	2		1	3	2	2	2		2	3	21	10	30		2		2		2			2		2					2
许忠华	B	345	1		1966	6	51	5	3	6	4	4	1	2	1	2	2		2	1					1	25	2		2			2		2
陈容	B	346	2	2	1958	5	59	6	2	6	3	4	1	2	2	2	2		2	1					1	30	2		2			2		2					2
彭源芳	B	347	1		1936	11	81	1	1	1	4	4	1	2	2	2	2		2	3	25	25	20				2		2			2		2
陈仲雄	B	348	1		1956	6	62	1	3	1	2	4	1	2	2	3	2		2	1					2		2		2			2		2					3
吴小锋	B	349	1		1982	8	35	1	4	6	5	4	1	3	1	2	2		2	3	15	20	20		2		2		2			2		2					2
叶志光	B	350	1		1965	7	51	6		1	3		1	2	1	1	2		2	1					2		2		2			2		2					2
林青茹	B	351	2	1	1986	4	31	6	4	3	3	4	1	2	2	2	2		1	1					2		2		2			2		2					2
蔡和燕	B	352	2	1	1967	10	49	1	3	1	3	4	1	2	2	2	2		2	1					2		2		1	14		2		2					2
陈文亮	B	353	1		1976	9	41	6	4	6	3		1	2	2	2	2		2	3	26		20		1	15	2		2			2		2					2
吴亚武	B	354	1		1961	11	55	1	3	1	4		1	2	2	2	2		2	3					1	20	2		2			2		2					2
张平贞	B	355	2	1	1950	11	67	1	2	1	4	4	1	2	2	1	2		2	1					2		2		2			2		2					2
梁少军	B	356	1		1957	7	60	6	3	1	4	4	1	2	2	2	2		2	3	19	40	20		1	20	2		2			2		2
林月香	B	357	2	1	1955	1	62	1	2	3	5	4	1	2	2	3	2		2	1					2		2		2			2		2
吴来金	B	358	1		1963	12	53	6	2	1	3		1	3	2	2	2		2	1					1	10	1	1	2			2		2					2
纪武	B	359	1		1962	4	55	1	3	1	4	4	1	2	2	2	1	6	2	1					2		2		2			1	3	2					2
方创光	B	360	1		1954	4	63	1	3	6	5		1	2	2	2	2		2	3	27		30		2		2		2			2		2
何亚芳	B	361	1		1970	9	47	1	4	6	3		1		2	2	2		2	3	18		60		1	20	1	1	2			2		2					2
陈东荣	B	362	1		1956	10	60	1	3	1	3		1	2	2	2	2		2	3	23	27	10		1	38	2		2			2		2
李海燕	B	363	2	2	1980	4	37	6	3	1	4	4	1	3	2	2	2		2	1					2		2		2			2		2					2
施良明	B	364	1		1962	7	55	6	4	3	3		1	3	2	2	2		2	3	22	33	50		2		2		2		2	1	2	2					2
黄玉妹	B	365	2	2	1970	2	47	1	2	2	4	4	1	2	2	2	1	6	2	1					2		2		2			2		2					3
卓育森	B	366	1		1976	5	41	1	3	1	3		1	2	2	2	2		2	3	18	23	20		1	23	1	1	1	1		1	4	1	2	2	2		3
李曼丹	B	367	2	2	1978	7	38	1	3	6	3	4	1	2	2	2	2		2	1					1	12	2		2			2		2					2
钟海英	B	368	2	2	1966	2	52	6	2	6	2	4	1		2	2	2		2	1					1	25	2		2			2		2					2
光珠	B	369	2	1	1967	4	50	1	2	1	3	4	1	3	2	2	2		2	1					2		2		2			2		2					2
杨亚莲	B	370	2	2	1960	9	57	1	3	6	3		1	2	1	3	1	6	2	1					2		2		2			2		2					2
黄卓娟	B	371	2	1	1966	3	51	1	3	3	3	3	1	1	2	2	2		2	1					1		2		2			2		2					3
韩琼花	B	372	2	1	1935	5	82	6	0	6	4	4	1	2	1	2	2		2	1					1	20	2		2			2		2					3
王天明	B	374	1		1969	12	48	1	4	1	4	4	1		2	2	2		2	3	23	25	30		1		1	1	1	1		2		2					2
黄泰勇	B	375	1		1962	8	55	1	3	6	5	4	1	1	2	2	2		2	3	22	33	40				2		2			2		2
黄翠霞	B	376	2	1	1964	2	53	6	3	6	3	4	1	1	2	2	2		2	1					1	20	2		2			2		2					2
林昌盛	B	377	1		1964	6	53	1	4	6	3	4	1	2	1	2	2		2	3	20	33	12				2		2			2		2
黄妹	B	378	2	1	1965	1	52	1	3	1	3	4	1	2	2	2	2		2	1					1	30	2		2			2		1	1	2	6	2	3
章俄标	B	379	1		1958	9	58	1	4	6	4	4	1	1	1	1	1	6	1	1					2		2		2			2		2
吴月娥	B	380	2	1	1961	1	66	6	2	6	2	4	1	3	2	2	2		2	1					2		2		2			2		2
周士程	B	381	1		1976	1	41	1	4	6	3		1	3	2	2	1	6	2	3	22	19	30				2		2			2	4	2
许明亮	B	382	1		1959	12	58	1	4	1	3		1	2	2	3	2		2	3	20	30	20		1	30	2		2			2		2	3	1			2
李萍	B	383	2	2	1974	2	42	1		2	1	4	1	3	2	2	2		2	1					2		2		2			2		2					2
李彩娟	B	384	2	2	1964	8	52	1	3	1	3	4	1	2	2	2	2		2	1					1	30	2		2			2		2					2
黄伟清	B	385	2	1	1943	9	75	1	2	1	3	4	1	2	2	2	2		2	2		60	5		2		1	7	2			2		2					2
朱小彪	B	386	1		1962	3	55	1	3	6	4		1	3	1	3	2		2		20		20		1	20	2		2			2		1	3	2			3
王桂春	B	387	1		1966	4	51	6	2	1	2	4	1	3	2	3	2		2	3	18	33			2		2		2			2		1	1	2		1	2
罗雪琼	B	388	2	1	1938	8	79	1	1	1	2	4	1	3	2	3	1	6	2	1					2		2		2			2		2
许志宁	B	389	1		1962	5	55	1	3	1	3	4	1	2	2	2	2		2	1					2		1	1	2			2		2
张启光	B	390	1		1963	3	54	1	3	1	3		1	2	2	2	2		2	3	24	30	20		1		1	1	2			2		2					2
催传玲	B	391	2	2	1971	4	46	6	4	6	4	4	1	2	2	2	2		2	1					2		2		2			1	3	2	3				3
邱美华	B	392	2	1	1961	5	56	1	2	1	3	4	1	2	1	2	2		2	1					2		2		2					2	3	3	12	13	1	1
陈亚清	B	393	1		1949	5	68	1	3	1	3		1	3	2	2	2		2	3	25	43	10		1	30	2		2			2		2
陈德光	B	394	1		1959	9	67	6	2	1	3		1	3	1	1	1	6	2	3	25	42	20		1	10	2		2			2		2					2
吴胜平	B	395	1		1962	2	55	6	3	6			1		2	2	2		2	3	25	26					2		2			2		2
吴木梅	B	396	2	1	1954	2	63	1	2	1	2	4	1	3	2	3	1	6	2	1					2		2		1	1		2		2
叶秀连	B	397	2	2	1958	1	59	1	3	1	2	4	1	3	2	2	1	6	2	1					2		2		2			2		2
欧翠华	B	398	2	1	1962	2	55	6	2	1	3	4	1	3	2	2	2		2	1					2		2		2			2		2					2
陈云燕	B	399	2	2	1976	11	40	1	3	1	4	4	1	2	2	2	2		1	1					2		2		2		2		2	2					2
王雪姬	B	400	2	2	1955	6	62	1	3	6	4	4	1	3	1	2	2		2	1					2		2		2			2		2
曾秀容	B	401	2	1	1964	12	53	6	2	6	2	4	1	3	2	1	1	6	2	1					1	2	2		2			1	4	2					2
何少琴	B	402	2	1	1969	1	48	1	3				1		2	2	1	6	2	1							2		2			2		2					2
唐燕珍	B	403	2	2	1968	11	48	1	3	1	3	4	1	3	2	1	2		1	1					2		2		2			2		2					2
杨月兰	B	404	2	1	1948	5	69	6	3	6	3	4	1	2	2	3	2		1	1					1	35	2		2			2		2
张晓珍	B	405	2	2	1984	8	33	1	4	3	4	4	1	3	2	2	2		2	1					2		2		2			2		2					2
郑燕平	B	406	1		1964	1	53	1	3	6	3		1	2	2	2	2		2	3	43	10	10		2		2		2			2		2					3
催传燕	B	408	2	1	1982	10	35	1	2	2	4	4	1	2	2	2	2		2	1					1	20	2		1	7		2		2
李若娟	B	409	2	2	1979	6	38	1	2	6	1	3	1	3	1	2	2		2	1					1	15	2		2			2		2					2
陈亚雄	B	410	1		1957	5	60	1	3	1	3		1	3	1	1	1	6	2	2		10	10		2		2		2			2		2					2
陈明芳	B	411	2	1	1964	12	53	1	3	1	2	4	1	3	1	1	2		2	1					2		1	1	1	1		2		2
邱俊花	B	412	2	2	1970	8	47	1	3	3	4	4	1	3	1	2	2		2	1					2		2		2			2		2					2
陈运兰	B	413	2	1	1966	4	51	1	3	2	3	4	1	2	1	2	2		2	1					1	5	2		2			2		2					3
岑亚兰	B	414	2	2	1952	10	65	6	1	2	4	4	1	2	2	2	2		2	1					1	30	2		2			2		2					2
顾贤春	B	415	1		1950	7	68	1	3	6	4		1	2	2	2	2		2	3	30		20				2		2			2		2					2
陈家文	B	416	1		1942	8	75	1	2	1	6		1	1	2	1	2		2	1					2		2		2			2		2
张惠珍	B	417	2	1	1931	4	82	1	0	2	3	4	1	2	2	2	2		2	1					2		2		2			2		2					3
候亚二	B	418	1		1963	1	54	1	3	6	5		1	2	1	2	2		2	3	20		80		1	10	2		2			2		2					2
梁少敏	B	419	1		1960	10	56	1	4	6	5		1	3	2	2	2		2	2					2		2		2			2		2					2
温少玲	B	420	2	2	1967	7	49	1	4	1	5	4	1	2	2	1	2		2	1					1		2		2			2		1	1	2	半		2
林勇	B	423	1		1961	11	56	1	3		5		1	3	2	1	2		2	3	21	30	20		2		2		2			2		1	1	2	9	3	1
黄志刚	B	424	1		1957	9	60	1	2	1	4		1	3	1	2	2		2	3	25	20	20		2		2		2			2		2					2
杨明浩	B	425	1		1957	5	60	6	2	1	4		1	3	2	2	2		2	1					2		2		2			2		2
刘玉美	B	426	2	1	1957	3	60	1	2	2	1	4	1	3	2	2	2		2	1					2		2		2			2		2					2
卓德武	B	427	1		1952	12	24	1	2	6	2		1	2	2	3	2		2	3	24	40	20		1	40	2		2			2		2					2
纪乙和	B	428	1		1950	8	66	6	3	1	4		1	2	2	2	2		2	3	28	38	10		2		2		2			2		2					2
黄连珍	B	429	2	1	1960	7	57	5	3	2	3	4	1	2	2	2	1	6	2	1					1	10	2		2		5	2		2		5			2
黎亚莲	B	430	2	1	1958	6	60	6	2	6	1	1								1					2		2		1	1		2		2
胡亚成	B	431	2	1	1946	5	71	1	1	2	1	4	1	2	1	1	1	5	2	1					2		2		2		5	2		1	1	1		1	1
朱亚海	B	432	1		1959	10	67	1	4		1		1	3	2	2	1	2	2	1					1	35	2		2			2		2															1
林英	B	433	2	1	1958	11	59	1	3	6	2	4	1	2	2	2	2		2	1					2		2		2			2		2					2
杨英容	B	434	2	1	1952	1	65	1	2	1	2	4	1	2	2	3	2		2	1					2		2		2			2		2
李菊连	B	435	2		1970	20	47																						2					2
欧美菊	B	436	2	1	1959	4	68	6	2	1	3	4	1	2	2	2	2		2	1					1	39	2		1	6		2		2
翁月芹	B	437	2	1	1962	3	55	1	2	1	3	4	1	3	2	2	2		2	1					1	28	2		2			2		2					2
梁召才	B	438	1		1933	11	83	1	2	1	3		1	3	2	2	2		2	1					2		2		2			2		1	1	2	6	12	3
顾梅英	B	439	2	1	1950	7	67	1	0	1	4	4	1	2	2	2	2		2	1					2		1	1	2			2		2					2
肖军	B	440	1		1962	5	55	1	3	3	4	4	1	2	2	2			2	3	20	35	20		2		2		2			2		2					2
王亚光	B	441	1		1948	3	69	1	3	6	4		1	3	2	2	2		2	1					2		2		2			2		2					2
邱菊妃	B	442	2		1973	4	44	1	2	2	1	4				2			2								2		2					2
陈晓蕾	B	443	2	2	1982	12	35	6	4	3	4	4	1	2	2	2	2		2	1					2		2		2			1	3	2					2
王云玲	B	444	2	2	1980	1	37	6	3	1	3	4	1	3	2	2	2		2	1					2		2		2			2		2					2
王梅花	B	445	2	1	1965	1	52	6	3	1	3	4	1	3	2	1	2		2	1					1	30	2		2			2		2					2
苏润菊	B	446	2	2	1960	1	55	6	2	6	2	4	1	2	2	3	2		2	1					2		2		2			2		2					3
陈玉兰	B	447	2	1	1954	9	62	6	2	6	1	4	1	3	2	2		2		1					2		2		2			2		2					2
黄娟梅	B	448	2	2	1969	2	48	6	2	1	2	4	1	2	2	2	2		2	1					2		2		2			2		2					2
王辉明	B	449	1		1951	6	66	1	4		1		1	2		2	2			3	16	50	10		2		2		2			1	5	2
陈祝容	B	450	2	1	1964	7	53	1	3	6	2	4	1	3	2	2	2		2	1					1		2		2			2		2					2
粱合女	B	451	2	1	1944	5	73	1	1	1	3	4	1	2	2	2	2		2	1					2		2		2			2		2					2
杨亚亿	B	452	2	1	1959	6	56	1	2	1	2	4	1	3	2	2	2		2	1					1	34	2		1	1		2		2					2
粱召瑞	B	454	2	2	1954	4	65	5	1	6	2	4	1	2	1	2	2		2	1					2		2		2			2		2					2
陈彩红	B	455	2	2	1967	9	50	1	2	1	2	4	1	2	2	2	2		2	1					2		2		2			2		2
陈健英	B	456	2	1	1954	6	62	1	1	1	4	4	1	3	2	1	2		2	1					2		2		2			2		2					2
陈其毓	B	457	2	1	1960	10	57	1	3	1	3	4	1	2	2	2	2		2						2		2		2			2		1	1	2			2
陈颂民	B	458	1		1964	7	53	1	3	1	3		1	3	2	2	2		2	2					2		2		2			2		2					2
黎锡凤	B	459	2	1	1962	6	55	1	2	6	1	4	1	3	2	3	2		2	1					2		2		2			2		2					2
莫妚荣	B	460	2		1958	9	50	6	4	1	5	4	1	3	2	2	2		2	1					1	40	2		1	4		2		2					2
张秋霞	B	462	2	2	1964	7	52	1	2	6	2	4	1	3	2	3	2		2	1					1	30	2		2			2		2					2
杨梅菊	B	463	2	2	1963	5	54	1	2	2	1	4	1	3	2	2	2		2	1					2		2		1	7		2		2
黄宏诚	B	465	1		1958	9	59	6	4	3	4		1	3	2	2	2		2	1					1		2		2			2		2					2
黎亚菊	B	466	2	2	1953	6	62	1	2	6	2	4	1	2	1	2	2		2	1							2		2			2		2					3
朱家良	B	467	1		1952	8	64	1	3	6	3		1	3	2	2	2		2	1					2		2		2			2		2					2
罗延玲	B	468	2	1	1964	10	53	1	3	1	2		1	2	2	2		6	2	1					2		2		2			2		2					2
林桂容	B	469	2	1	1953	2	64	1	2	6	3	4	1	3	2	2	2		2	1					2		2		2			2		2					2
王裕容	B	470	2	1	1954	1	63	6	3	1	2	4	1	3	2	2	2		2	1					2		2		2			1	45	1	1	2	19	1	3
林美	B	471	2	1	1965	3	52	6	2	1	2	4	1	3	2	3	2		2	1					2		2		2			2		2					3
莫玉兰	B	472	2	1	1943	6	74	6	1	1	2	4	1	2	2	3	2		2	1					2		2		2			2		2					3
林斯珍	B	473	2	2	1981	9	36	1	2	6	1	4	1	3	2	2	2		2	1					1		2		2			2		2					2
苏润英	B	474	2	1	1957	8	60	6	1	1	2	4	1	2	2	2	2		2	1					2		2		2			1	5	1	1	2	13	1	2
陈亚莲	B	475	2							6			1	3	2	2	2		2	1					2		2		2			2		1	1	2	1		3
冯美珍	B	476	2	1	1958	4	59	1	2	1	4	4	1	2	1	2											2		2			1	2	1	3	2
杨丰源	B	477	1		1993	3	24	6	4	1	3		1	2	2	2	2		2	3	15	9					2		1	24		1	1	2					3
黄和月	B	479	2	1	1962	4	55	1	3	6	2	4	1	3	2	2	2		2	1					2		2		2			2		2					2
黄文华	B	480	1		1959	2	57	1	3	6	4	4	1	2	2	2	2		2	3	25	32	4		1	30	2		2			2		2
崔传逛	B	481	1		1964	3	53	6	3	6	4	4	1	2	2	3	2		2	3	17	36	20		2		2		2			1	3	2					3
朱春容	B	482	2	1	1970	8	47	6	3	6	2	4	1	3	2	2	2		2	1					2		2		2			2		2					2
杨兴梅	B	483	2	1	1942	6	76	6	1	1	2	4	1	2	2	3	2		2	1					2		2		1	4		2		2					3
冯美琴	B	484	2	1	1963	3	54	6	2	1	2	4	1	3	1	2	2		2	1					1	35	2		1	4		2		2					2
杨玉兰	B	485	2	1	1956	2	61	6	2	1	3	4	1	2	2	2	2		2	1					2		2		2			2		1	3	2			2
梁秀英	B	486	2	2	1961	6	55	1	2	3	3	4	1	2	2	3	2		2	1					2		2		1	1		2		2
黄梅珍	B	487	2	1	1967	3	50	1	3	1	3	4	1	2	2	2	2		2	1					1	28		2	2			2		2					2
岑居文	B	488	2	1	1936	6	81	1	2	1	3	4	1	2	2	3	2		2	1					2		2		2			2		2					2
王明珍	B	489	1		1952	2	65	6	2	1	2		1	3	2	3	2		2	1							2		2			2		1	1	2			1
吴肖群	B	490	2	1	1955	9	62	1	2	1	2	4	1	2	2	3	2		2	1					2		1	5	2			2		1	1	2	7	17	1
赖汝琼	B	491	2	1	1957	10	59	1	2	1	5	4	1	3	2	2	2		2	1					2		2		2			1	2	2					2
郑礼明	B	492	1		1945	11	71	1	2	1	2		1	3	2	3	2		2	3	14	58	20		2		2		2			1	5	2					2
卓海慧	B	493	2	1	1978	10	39	1	3	6	2	4	1	2	2	2	2		2	1					2		2		2			1	4	2					2
纪海荣	B	494	2	2	1972	6	46	1	4	3	5	4	1	3	2	2	2		2	1					1	20	2		2			1	5	2					2
杨惠霞	B	495	2		1974	10	42	6	3	1	4		1	3	2	2	2		2	1					2		2		2			2		2					2
张春美	B	496	2	1	1965	4	52	6	2	6	3	4	1	2	2	3	2		2	1					1	20	2		2			2		2					2
李秋花	B	500	2	1	1964	2	53	6	3	6	1	4	1	2	2	2	2		2	1					1	27	2		2			2		2					2
周强	B	501	1		1964	1	53	1	2	1	1	4	1	2	2	2	2		2	1							2		2			2		2					3
吴桂芳	B	502	2	2	1966	2	51	6	2	1	3	5	1	3	2	1	2		2	1					1	7	2		2			2		1	1	2	1	2	3
严琼燕	B	503	2	1	1961	6	56	6	2	2	1	4	1	2	2	3	2		2	1					2		2		2			2		2					2
崔海玉	B	504	2	2	1983	4	34	1	1	6	3	4	1	3	2	3	2		2	1					2		2		2			1	4	2					3
陈雪容	B	505	2	1	1961	12	56	1	3	1	2	4	1	2	2	2	2		2	1					2		2		1	4		2		2					2
陈丽虹	B	506	2	1	1962	6	55	1	3	1	4	4	1	2	2	2	2		2	1					1		2		2			2		2					2
梁花	B	507	2	2	1962	4	55	1	3	1	3	4	1	3	2	2	2		2	1							2		2			2		2					2
文瑜	B	508	2	2	1991	11	25	6	4	6	3	5	1	3	2	1	2		2	1					2		2		2			2		2
卓妃燕	B	509	2	2	1977	12	40	1	3	4	1	4		2	2	3	2		2								2		2			1	4	2
陈梅	B	510	2	1	1963	11	53	1	3	6	5	4	1	2	2	3	2		2	1					2		2		2			2		2					2
黄梅兰	B	511	2	1	1968	12	49	1	2	1	3	4	1	3	2	2			2						1	10	2		2			2		2					2
杨琼花	B	512	2	1	1959	5	58	1	2	1	3	4	1	3	1	1	2		2	1					2		2		2			2		2					1
朱学友	B	513	1		1963	7	54	1	3	1	4	4	1	2	2	2	2		2	3	30	24	20				2		2			2		2					2
陈运浩	B	514	1		1957	9	59	6	4	6	4		1	3	2	2	2		2	1	33	8			1	8	2		2			2		2					2
符亚銮	B	515	2	1	1958	1	58	1	3	6	4	4	1	1	2	3	2		2	1					2		2		2			2		2					3
陈梅花	B	516	2	1	1956	8	61	1	3	1	1	1	1	3	2	2	2		2	1					1	7	2		2			2		1	1	2		12	2
苏德民	B	517	1		1961	2	55	1	3	1	2	4	1	3	2	2	2		2	3	20	30	1		2		2		2			2		2					2
翁月娥	B	518	2	1	1963	8	54	1	3	1	2	4	1	2	1	2	2		2	1					2		2		2			2		2					3
顾玉兰	B	519	2		1963	9	54	6	2	1	2	4	1	3	2	3	2		2	1					2		2		2			2		2					2
文孔	B	520	1		1963	8	54	1	4	3	4		1	1	2	2	2		2	3	18	39	20				2		2			2		2					2
肖琼花	B	521	2	2	1955	4	61	6	1	6	1	4	1	1	2	3	2		1	1					1	8			2					1	1	2			1
黄菊香	B	522	2	1	1966	7	51	1	2	1	1	4	1	3	2	2	2		2	1					2		2		2			2		2					3
黄玉	B	524	1		1968	5	49	6	4	1	5		1	3	2	2	2		2	1					2		2		2			2		2					2
林月珍	B	525	2	1	1962	10	55	1	2	6	3	4	1	3	2	3	2		2	1					1	30	2		2			2		2					3
岑昌山	B	526	1		1963	3	54	1	3	6	1		1	3	2	2	2		2	1					2		2		2			2		2					2
粱飞	B	527	2	1	1958	5	59	1	3	1	4	4	1	2	2	2	2		2	1					1	3	2		2			2		2					2
文小妹	B	528	2	1	1963	11	54	1	1	1	2	4	1	3	2	3	2		2	1					2		2		2			2		2					2
周杰	B	529	1		1974	3	43	6	3	6	2		1	3	2	2	2		2	1					2		2		2			2		2					3
翁素珍	B	530	2	1	1957	7	61	1	3	1	2	4	1	3	1	1	1	6	2	1					2		2		2			1	4	1	1	2			2
粱小翠	B	531	2	2	1969	5	48	6	4	3	1	4	1		2	3	2		2	1					1		2		2			2		2					2
李小妹	B	532	2	2	1971	12	46	1	3	2	3	4	1	3	2	3	2		2	1					2		2		2			2		2					3
许志广	B	533	1		1966	4	51						1	3	1	2	1	6	2	1									1		5	2		2					3
陈少军	B	534	1		1969	4	48	1	3	1	5		1	3	2	2	2		1	2	20	28	3		1	20	2		2			2		2					2
贺爱莲	B	535	2	1	1950	6	67	6	1	2	1	4	1	3	2	2	2		2	1					2		2		2			1	5	1	2	2			3
李进传	B	536	1		1946	12	70	1	2	1	3		1	1	2	2	2		2	1					2		2		2			2		2					2
杨泽川	B	537	1		1962	9	55	1	3	6	4	4	1	3	2	2	2		2	1					2		2		2			2		2					3
吴天平	B	538	1		1959	9	51	1	3	1	4		1	1	2	2	2		2	1					1	30	2		2			2		2					2
胡亚美	B	539	2	2	1968	7	47	6	2	4	4	4	1	3	1	2	2		2	1					2		2		2			2		2					2
黎道斌	B	540	1		1956	9	61	1	3	1	1	4	1	1	2	3	2		2	1					2		2		2			1	3	1	1	2	9	17	3
黄桂英	B	544	2	1	1945	7	75	5	1	2	1	4	1		2	2	2		2	1					2		2		2			2		1	1	2	1	1	2
粱亚娟	B	546	2	1	1954	4	63	1	2	1	2		1	2	2	2	2		2	1					1		2		2			2		1	2	2			2
李平	B	548	1		1952	4	65	1	2	2	4	4	1	1	2	2	2		2	3	20	20	2		2		1	4	1	24		1	34	1	3	2			2
李菊兰	B	549	2	1	1948	8	68	1	1	6	3	4	1	2	2	2	2		2	1					2		1	7	2			2		1	3	2
李金英	B	550	2	2	1974	1	43	6	2	4	5	4	1	3	2	2	2		2	1					1	20	2		2			2		2					2
吴天智	B	551	1		1970	5	47	1	3	4	3		1	2	2	2	2		2	3	25	15	10		2		2		2			2		2					2
肖兴连	B	554	2	1	1952	3	65	6	1	1	3	4	1	2	2	3	2		2	1					2		1	1	2			2		1	1	2
张广锐	B	555	1		1962	2	55	1	1	1	1	4	1	2	2	2	2		2	1					2		1	3	2			2		2					2
陈关育	B	557	1		1955	10	62	6	3	6	2		1	2	2	3	2		2	3	22	40	40		2		2		2			2		1	3	2		12
黄玉春	B	558	2	1	1957	11	60	1	2	1	1	4	1	1	2	3	2		2	1					2		2		2			2		1	1	2	4		1
黄乙珍	B	559	2	2	1963	1	53	1	2	2	1	4	1	3	1	2	2		2	1					2		2		2			2		2					3
曾亚妹	B	560	2	1	1953	9	64	1	0	6	2	4	1	3	2	2	2		2	1					2		2		2			2		1	1	2		1
林尤力	B	561	1		1952	10	65	1	2	6	4	4	1	1	2	2	2		2	3	25	40	20		2		2		2			1	5	1	1	2	3	125	1
林源	B	564	2	2	1983	6	34	1	4	6	4	4	1	2	1	2	2		2	1					1	11	2		2			2		2
廖光健	B	565	1		1980	4	37	1	2	1	4	4	1	1	1	2	2		2	1	15		20		1	37	1	1	2			1	4	2
冯丽梅	B	566	2	1	1956	10	60	1	3	3	5	4	1	2	2	2	2		2	1					2		2		1	5	5	2		1	2	2		12
徐海菊	B	567	2	2	1984	2	34	1	2	4	4	4	1	2	2	2	2		2	1					1	20	2		2			2		2					2
吴碧	B	568	2	1	1953	7	64	1	2	2	1	4	1	1	2	3	2		2	1					1	23	1	1	2			2		1	1	2	5	12	1
李月容	B	569	2	1	1967	12	49	1	2	2	3	4	1	3	2	3	2		2	1					1	20	2		2			2		2					2
朱月琼	B	571	2	2	1975	4	42	1	2	3	1	4	1	2	1	1	2		2	1					1	15	1	7	2			2		2					3
吴坤栋	B	572	1		1975	7	42	1	2	6	3	4	1	2	2	3	2		2	3	22		20		2		2		2			2		2					2
陈亚姑	B	575	2	1	1975	11	42	1	1	2	4	1	1	3	1	1	2		2	1					1	20	2		2			2		2					2
王功进	B	576	1		1946	8	71	1	2	2	3	4	1	1	2	3	2		2	1					2		2		2			2		2
何华梅	B	577	2	2	1977	9	39	1	2	2	3	4	1	2	2	1	2		2	1					1	5	2		2			2		2
吴多日	B	578	1		1962	3	55	1	0	2	5	4	1	2	2	2	2		2	3	30	25	30		1	10	2		2			2		2
王惠玲	B	579	2	1	1977	10	39	1	3	2	2	4	1	1	2	3	2		2	1					1	10	2		2			2		2
岑梅銮	B	580	2	2	1973	4	44	1	0	2	1	4	1	1	2	3	2		2	1					2		2		1	1		2		2					3
杨秀英	B	582	2	2	1957	6	60	1	2	2	3	4	1	2	2	3	2		2	1					2		2		2			2		1	2	2		1	2
廖孝新	B	584	1		1967	4	50		1	2	3		1	3	2	3	2		2	3	20	30	60		2		2		2			2		2					2
王仕连	B	585	1		1950	7	67	1	3	2	5	4	1	3	2	2	2		2	1					1	15	2		1	3		2		1	2	3			2
吴桂清	B	587	2	1	1956	9	60	1	3	2	4	4	1	1	2	3	2		2	1					1	15	2		2			2		1	2	3	7	1
朱鲜	B	588	2		1968	5	49	1	3	3	3	4	1	1	1	2	2		2	1					1	20	2		2			2		2
蔡兴仁	B	589	1		1957	10	69	1	3	2	4	4	1	2	2	3	2		2	1					2		2		2			2		1	3	2
陈丽新	B	590	2	1	1955	3	62	1	2	2	3	4	1	3	2	3	2		2	1					2		2		2			2		1	2	2			2
劳燕	B	591	2	2	1971	7	37	1	2	3	3	4	1	3	2	3	2		2	1					1	30	2		2			2		2
陈瑞珠	B	592	2	1	1960	7	57	1	3	6	3	4	1	3	2	3	2		2	1					1	2	2		2			2		2
李民	B	594	1		1978	9	39	1	3	2	3	4	1	2	2	3	2		2	1					1	25	2		2			2		2
廖光裕	B	595	1		1951	8	66						1	3	2	2	2		2	1					1	17	2		2			2		1	1	2	2
陈英兰	B	596	2	1	1954	6	63	1	2	2	3	4	1		2	2	2		2	1					1	10	2		2			2		1	1	2			3
李有江	B	597	1		1952	10	65	1	2	2	3		1	3	2	2	2		2	3	20	45	20		2		2		2			2		1	3	2	3	1
符福娇	B	598	2	2	1975	9	42	1	1	2	3	4	1	3	2	3	2		2	1					1	30	2		2			2		2					2
李爱来	B	599	1		1987	10	30	1	2	2	4		1	3	1	2	2		2	1					2		2		2			2		2					2
傅为英	B	601	2	1	1978	10	39	1	2	2	5	4	1	3	2	2	1	6	2	1					2		2		1	1		2		2
冼小霞	B	602	2	2	1969	7	48	1	0	2	1	4	1	1	2	3	2		2	1					2		2		2			2		2					3
王桂玉	B	603	2	1	1969	8	48	1	2	2	5	4	1	2	2	3	2		2	1					2		2		2	1		2		2
王美	B	604	2	2	1975	3	42	1	2	2	1	4	1	2	2	2	2		2	1					1	30	2		2			2		2
陈红容	B	605	2	2	1991	6	25	1	2	2	4	4	1	3	2	2	2		2	1					2		2		1	1		2		2					2
罗贻福	B	606	1		1958	10	59	1	3	1	4	4	1	1	2	2	2		2	2							2		2			2		2
王兰姑	B	607	2	2	1964	4	53	1	2	6	3	4	1	2	2	3	2		2	1					1	20	1	7	2			2		2					2
罗桂英	B	608	2	2	1959	4	58	1	1	6	1	4	1	2	2	2	2		2	1					1	5	1	7	2			2		2					2
李爱菊	B	609	2	1	1962	10	54	1	2	6	3	4	1	1	2	2	2		2	1					2		2		2			2		2					2
黄道生	B	610	1		1971	3	46	1	1	2	1	4	1	3	2	3	2		2	3		30	1				1	6	2			2		2					3
颜桂梅	B	611	2	2	1948	7	69	1	1	2			1	2	2		2		2	1					1		2	2	1	2		2		1	1	2			3
王兰英	B	612	2	1	1962	8	55	1	2	6	5	4	1	2	2	2	2		2	1							2		1	1		2		2
王昌和	B	613	1		1954	11	63	1	2	6	4	4	1	2	2	2	2		2	1					1	10	2		2			2		1	3	2			2
麦桂英	B	614	2	1	1959	4	58	1	0	6	3	4	1	1	2	3	2		2	1					1	30	2		2			2		2					2
林桂容	B	615	2	1	1947	4	70	1	1	6	1	4	1	3	2	3	2		2	1					1	30	1	1	2			2		2					3
符梅英	B	616	2	1	1965	6	52	1	2	6	4	4	1	3	2	3	2		2	1					1	35	2		2			2		2
陈月	B	617	2	2	1982	1	35	1	2	2	3	4	1	2	2	2	2		2	1					2		2		2			2		2
李明丹	B	618	1		1980	5	37	1	3	2	4	4	1	2	2	2	2		2	1					2		2		2			2		2
李世成	B	619	1		1954	10	63	1	3	2	3		1	3	2	2	2		2	2	55	8	10		1	8	2		2			1	5	1	1	2	12	2	3
李爱泽	B	620	1		1983	3	33	1	3	2	1	5	1	2	1	2	2		2	3		10	1				2		2			2		2					3
李儒青	B	621	1		1962	9	56	1	3	2	2	4	1	2	2	3	2		2	3		30	1				2		2			2		2					3
王选坚	B	622	1		1955	7	62				3		1	3	2	3	2		2	3	20	40	20		2		2		1	1		2		1	1	2	6
蔡笃花	B	623	2	2	1957	7	60	1	0	6	5	4	1	3	2	2	2		2	1					1	42	2		2			2		1	1	2	10	2	3
吴秀容	B	624	2	1	1962	9	55	1	1	2	3	4	1	3	2	3	2		2	1					2		2		2			2		2					2
周秀连	B	625	2	2	1976	11	41	1	2	1	4	4	1	1	2	3	2		2	1					1	16	2		2			2		2
杜国荣	B	626	1		1973	6	44	1	2	3	5	4	1	1	2	2	2		2	3	20	24	3				2		2			2		2
陈彦华	B	627	1		1958	9	59	1	3	3	3	4	1	2	2	2	2		2	3	30	28	10		2		1	7	2			2		2					2
[truncated: 65 more columns]
